# Supplementary material
Source: PubMed Central journal article supplement (PMC2718362)
Supplement: 0902790106_ST1_PDF.pdf [file 0902790106_ST1_PDF.pdf]

Table S1. A list of all the genes analyzed in the microarray analysis and whose signal ratios (-N/+N) are shown

| Gene number <sup>a</sup> | Gene product <sup>a</sup>                                       | Ratio (-N/+N) <sup>b</sup> |
|--------------------------|-----------------------------------------------------------------|----------------------------|
| <i>CMG018C</i>           | Nitrate transporter                                             | 7.64 ± 1.17                |
| <i>CMK117C</i>           | Similar to Protein phosphatase 2C                               | 6.41 ± 0.69                |
| <i>CMT527C</i>           | Hypothetical protein                                            | 4.97 ± 0.49                |
| <i>CMT526C</i>           | High affinity ammonium transporter                              | 4.92 ± 1.59                |
| <i>CMS301C</i>           | Hypothetical protein                                            | 4.51 ± 0.96                |
| <i>CME096C</i>           | Similar to RNA binding protein HUA1                             | 4.34 ± 0.44                |
| <i>CMN035C</i>           | Hypothetical protein                                            | 4.21 ± 0.66                |
| <i>CMS095C</i>           | Hypothetical protein                                            | 3.92 ± 0.17                |
| <i>CMJ282C</i>           | MYB-related protein                                             | 3.87 ± 0.23                |
| <i>CML236C</i>           | Hypothetical protein                                            | 3.32 ± 0.08                |
| <i>CMC183C</i>           | Hypothetical protein                                            | 3.29 ± 0.12                |
| <i>CMJ222C</i>           | Hypothetical protein                                            | 3.19 ± 0.34                |
| <i>CMQ313C</i>           | Hypothetical protein                                            | 3.04 ± 0.20                |
| <i>CMM277C</i>           | Hypothetical protein                                            | 3.02 ± 0.83                |
| <i>CMQ066C</i>           | Hypothetical protein                                            | 2.95 ± 0.19                |
| <i>CMD108C</i>           | Probable lactoylglutathione lyase                               | 2.83 ± 0.09                |
| <i>CMS246C</i>           | Hypothetical protein                                            | 2.79 ± 0.21                |
| <i>CMS149C</i>           | Hypothetical protein                                            | 2.78 ± 1.85                |
| <i>CME036C</i>           | Hypothetical protein                                            | 2.77 ± 0.50                |
| <i>CMQ191C</i>           | Citrate synthase, mitochondrial precursor                       | 2.74 ± 0.46                |
| <i>CMI233C</i>           | Glutamine synthetase                                            | 2.74 ± 0.35                |
| <i>CMI268C</i>           | Hypothetical protein                                            | 2.67 ± 0.22                |
| <i>CMF144C</i>           | Hypothetical protein                                            | 2.67 ± 0.07                |
| <i>CMC149C</i>           | Phosphoglycerate dehydrogenase                                  | 2.64 ± 0.45                |
| <i>CMI140C</i>           | 60S acidic ribosomal protein P1                                 | 2.59 ± 0.59                |
| <i>CMI066C</i>           | Hypothetical protein                                            | 2.55 ± 0.41                |
| <i>CMK296C</i>           | Ubiquitin with short C-terminal extension                       | 2.52 ± 0.29                |
| <i>CMQ064C</i>           | Acetylornithine transaminase                                    | 2.51 ± 0.60                |
| <i>CMI118C</i>           | Similar to cell death-regulatory protein GRIM19                 | 2.51 ± 0.24                |
| <i>CME180C</i>           | Hypothetical protein                                            | 2.42 ± 0.24                |
| <i>CMR492C</i>           | Similar to MAP kinase phosphatase                               | 2.35 ± 0.69                |
| <i>CML209C</i>           | Glycerol-3-phosphate dehydrogenase                              | 2.31 ± 0.55                |
| <i>CMH176C</i>           | Similar to synaptobrevin-type protein transport protein         | 2.30 ± 0.54                |
| <i>CMN082C</i>           | Similar to GTP pyrophosphokinase                                | 2.30 ± 0.67                |
| <i>CMI072C</i>           | Mitochondrial alternative oxidase                               | 2.28 ± 0.47                |
| <i>CMG021C</i>           | Nitrite reductase (ferredoxin)                                  | 2.28 ± 0.98                |
| <i>CMO028C</i>           | Hypothetical protein                                            | 2.27 ± 0.59                |
| <i>CMM034C</i>           | NADH dehydrogenase I Fe-S protein, 75kDa subunit                | 2.27 ± 0.32                |
| <i>CMP037C</i>           | Hypothetical protein                                            | 2.26 ± 0.05                |
| <i>CMQ079C</i>           | Similar to subunit of cleavage and polyadenylation factor Mpe1p | 2.25 ± 0.34                |
| <i>CML066C</i>           | Similar to phosphate starvation-inducible ATPase PhoH           | 2.24 ± 0.15                |

|                |                                                                                 |             |
|----------------|---------------------------------------------------------------------------------|-------------|
| <i>CMS432C</i> | Hypothetical protein                                                            | 2.22 ± 0.33 |
| <i>CMR143C</i> | Ribonuclease P subunit POP1                                                     | 2.13 ± 0.56 |
| <i>CML201C</i> | Hypothetical protein                                                            | 2.10 ± 0.21 |
| <i>CML203C</i> | Hypothetical protein                                                            | 2.08 ± 0.15 |
| <i>CMI163C</i> | Similar to TBP-associated factor TAF9                                           | 2.08 ± 0.32 |
| <i>CMK303C</i> | Similar to ADP ribosylation factor 1 GTPase activating protein                  | 2.07 ± 0.23 |
| <i>CMP179C</i> | 60S ribosomal protein L10A                                                      | 2.07 ± 0.20 |
| <i>CMJ068C</i> | Hypothetical protein                                                            | 2.06 ± 0.27 |
| <i>CMO230C</i> | Hypothetical protein                                                            | 2.06 ± 0.23 |
| <i>CMT454C</i> | Similar to chondroitin 4-sulfotransferase                                       | 2.05 ± 0.20 |
| <i>CMQ189C</i> | Small GTP-binding protein of Rab family                                         | 2.04 ± 0.33 |
| <i>CMF092C</i> | Hypothetical protein                                                            | 2.04 ± 0.74 |
| <i>CMM003C</i> | Eukaryotic translation elongation factor 1 gamma (eEF-1g)                       | 2.04 ± 0.20 |
| <i>CMH234C</i> | Hypothetical protein                                                            | 2.03 ± 0.16 |
| <i>CMT361C</i> | Mitochondrial phosphate carrier protein                                         | 2.01 ± 0.55 |
| <i>CMI266C</i> | Hypothetical protein                                                            | 1.98 ± 0.06 |
| <i>CMH032C</i> | Similar to protein phosphatase 2C (PP2C)                                        | 1.98 ± 0.72 |
| <i>CMQ413C</i> | Hypothetical protein                                                            | 1.96 ± 0.48 |
| <i>CMC021C</i> | Pyruvate kinase                                                                 | 1.95 ± 0.46 |
| <i>CMN011C</i> | Similar to ubiquinone/menaquinone biosynthesis methyltransferase family protein | 1.94 ± 0.23 |
| <i>CMA004C</i> | Hypothetical protein                                                            | 1.93 ± 0.07 |
| <i>CMR500C</i> | Membrane-associated calcium-independent phospholipase A2                        | 1.93 ± 0.11 |
| <i>CMN222C</i> | Similar to regulator of chloroplast RNA processing, CRP1 (Zea mays)             | 1.91 ± 0.47 |
| <i>CMN228C</i> | Anthranilate synthase component I                                               | 1.91 ± 0.27 |
| <i>CMN330C</i> | Hypothetical protein                                                            | 1.91 ± 0.19 |
| <i>CMD139C</i> | Similar to endonuclease III                                                     | 1.91 ± 0.27 |
| <i>CMH044C</i> | Hypothetical protein                                                            | 1.90 ± 0.14 |
| <i>CMO302C</i> | 60S ribosomal protein l18a                                                      | 1.90 ± 0.38 |
| <i>CML246C</i> | MYB-related protein                                                             | 1.89 ± 0.48 |
| <i>CMM061C</i> | Hypothetical protein                                                            | 1.89 ± 0.18 |
| <i>CMM332C</i> | Hypothetical protein                                                            | 1.89 ± 0.23 |
| <i>CMT397C</i> | Hypothetical protein                                                            | 1.89 ± 0.16 |
| <i>CMH080C</i> | Hypothetical protein                                                            | 1.87 ± 0.09 |
| <i>CMH199C</i> | Hypothetical protein                                                            | 1.85 ± 0.22 |
| <i>CMB077C</i> | Similar to mitochondrial inner membrane protease IMP1                           | 1.85 ± 0.25 |
| <i>CMC096C</i> | Cytoplasmic aminopeptidase P                                                    | 1.85 ± 0.20 |
| <i>CMS125C</i> | Alcohol dehydrogenase class III                                                 | 1.84 ± 0.22 |
| <i>CMS131C</i> | Unknown protein for iron-sulfur cluster formation sufe                          | 1.84 ± 0.23 |
| <i>CMB099C</i> | Similar to brain protein                                                        | 1.84 ± 0.09 |
| <i>CMK012C</i> | Hypothetical protein                                                            | 1.83 ± 0.04 |
| <i>CMP084C</i> | Mitochondrial phosphate translocator MIR1                                       | 1.83 ± 0.15 |
| <i>CMP181C</i> | Similar to ubiquitin conjugating enzyme E2                                      | 1.81 ± 0.04 |
| <i>CMR122C</i> | 60S ribosomal protein L13A                                                      | 1.81 ± 0.20 |

|                |                                                                               |             |
|----------------|-------------------------------------------------------------------------------|-------------|
| <i>CMI170C</i> | Hypothetical protein                                                          | 1.80 ± 0.38 |
| <i>CMM316C</i> | Homeotic gene regulator (BRAHMA protein)                                      | 1.80 ± 0.29 |
| <i>CMN188C</i> | Similar to steroid binding protein                                            | 1.80 ± 0.24 |
| <i>CML242C</i> | Hypothetical protein                                                          | 1.80 ± 0.31 |
| <i>CML049C</i> | Glutamate dehydrogenase (NADP <sup>+</sup> ) 1                                | 1.80 ± 0.02 |
| <i>CMR129C</i> | Probable rRNA (adenosine-N6,N6)-dimethyltransferase                           | 1.79 ± 0.21 |
| <i>CMF080C</i> | Hypothetical protein                                                          | 1.79 ± 0.03 |
| <i>CML244C</i> | Hypothetical protein                                                          | 1.79 ± 0.39 |
| <i>CMR158C</i> | Mitochondrial Mn superoxide dismutase                                         | 1.77 ± 0.31 |
| <i>CMB107C</i> | Hypothetical protein                                                          | 1.76 ± 0.35 |
| <i>CMG016C</i> | Hypothetical protein                                                          | 1.75 ± 0.12 |
| <i>CMM060C</i> | Hypothetical protein                                                          | 1.75 ± 0.30 |
| <i>CML016C</i> | Probable DNA-(apurinic or apyrimidinic site) lyase (ARP)                      | 1.75 ± 0.28 |
| <i>CMI134C</i> | Hypothetical protein                                                          | 1.74 ± 0.17 |
| <i>CMH265C</i> | Hypothetical protein                                                          | 1.74 ± 0.20 |
| <i>CMQ353C</i> | Similar to ring-box protein 1                                                 | 1.73 ± 0.25 |
| <i>CMT312C</i> | Membrane-associated calcium-independent phospholipase A2                      | 1.73 ± 0.52 |
| <i>CMT623C</i> | DnaJ (Hsp40) homolog, subfamily B                                             | 1.73 ± 0.24 |
| <i>CMK059C</i> | RNA polymerase I, III common subunit                                          | 1.73 ± 0.27 |
| <i>CMN079C</i> | Hypothetical protein                                                          | 1.73 ± 0.10 |
| <i>CMN126C</i> | 40S ribosomal protein S26                                                     | 1.73 ± 0.31 |
| <i>CMN084C</i> | ADP/ATP translocase                                                           | 1.73 ± 0.39 |
| <i>CMH065C</i> | 60S ribosomal protein L14                                                     | 1.73 ± 0.31 |
| <i>CMS025C</i> | Hypothetical protein                                                          | 1.72 ± 0.33 |
| <i>CMH135C</i> | Unknown transcriptional coactivator, ALY homolog                              | 1.72 ± 0.17 |
| <i>CMT631C</i> | Sphingosine-1-phosphate lyase                                                 | 1.72 ± 0.52 |
| <i>CMD127C</i> | Hypothetical protein                                                          | 1.72 ± 0.34 |
| <i>CMP287C</i> | Hypothetical protein                                                          | 1.72 ± 0.37 |
| <i>CMG075C</i> | Unknown kinase with aarF domain                                               | 1.71 ± 0.20 |
| <i>CMR309C</i> | Similar to mitochondrial carrier protein (Mrs1p)                              | 1.71 ± 0.20 |
| <i>CMN056C</i> | Hypothetical protein                                                          | 1.71 ± 0.08 |
| <i>CMO338C</i> | Hypothetical protein                                                          | 1.71 ± 0.07 |
| <i>CMM079C</i> | Unknown transcriptional regulator                                             | 1.71 ± 0.18 |
| <i>CMD063C</i> | Hypothetical protein                                                          | 1.71 ± 0.04 |
| <i>CMS197C</i> | Isoamylase                                                                    | 1.70 ± 0.12 |
| <i>CMM217C</i> | Similar to single-stranded telomeric DNA-binding protein Gbp1 (hnRNP M)       | 1.70 ± 0.25 |
| <i>CMH226C</i> | Eukaryotic translation elongation factor 1 alpha (eEF-1a)                     | 1.70 ± 0.31 |
| <i>CML170C</i> | Similar to phosphoribosylanthranilate transferase                             | 1.70 ± 0.10 |
| <i>CMT430C</i> | Zinc finger protein                                                           | 1.70 ± 0.09 |
| <i>CMN176C</i> | Histone H3                                                                    | 1.70 ± 0.16 |
| <i>CMP207C</i> | Hypothetical protein                                                          | 1.69 ± 0.19 |
| <i>CMN173C</i> | Histone H2B                                                                   | 1.69 ± 0.02 |
| <i>CMN332C</i> | Serine hydroxymethyltransferase, cytosolic (glycine hydroxymethyltransferase) | 1.69 ± 0.22 |

|                |                                                                                           |             |
|----------------|-------------------------------------------------------------------------------------------|-------------|
| <i>CML325C</i> | Hypothetical protein                                                                      | 1.69 ± 0.12 |
| <i>CMM087C</i> | Hypothetical protein                                                                      | 1.69 ± 0.08 |
| <i>CMT298C</i> | Large fused protein of putative glutamine amidotransferase and glutamate carboxypeptidase | 1.69 ± 0.25 |
| <i>CMQ461C</i> | Chloroplast ribosome releasing factor RRF                                                 | 1.68 ± 0.51 |
| <i>CMS163C</i> | Zinc-finger protein                                                                       | 1.68 ± 0.39 |
| <i>CMII13C</i> | Similar to peroxiredoxin Q                                                                | 1.68 ± 0.16 |
| <i>CMH275C</i> | Hypothetical protein                                                                      | 1.67 ± 0.19 |
| <i>CMR319C</i> | Unknown globin-like protein                                                               | 1.67 ± 0.23 |
| <i>CMR229C</i> | Hypothetical protein                                                                      | 1.67 ± 0.04 |
| <i>CMT163C</i> | Hypothetical protein                                                                      | 1.67 ± 0.01 |
| <i>CMM253C</i> | 60S ribosomal protein L3                                                                  | 1.67 ± 0.10 |
| <i>CMQ134C</i> | Similar to ubiquinone/menaquinone biosynthesis methyltransferase                          | 1.66 ± 0.06 |
| <i>CMT032C</i> | Hypothetical protein                                                                      | 1.66 ± 0.14 |
| <i>CML191C</i> | Hypothetical protein                                                                      | 1.66 ± 0.24 |
| <i>CMN197C</i> | Hypothetical protein                                                                      | 1.65 ± 0.05 |
| <i>CML172C</i> | Hypothetical protein                                                                      | 1.65 ± 0.24 |
| <i>CMG157C</i> | 60S ribosomal protein L26                                                                 | 1.65 ± 0.30 |
| <i>CMM296C</i> | Alcohol dehydrogenase [NADP <sup>+</sup> ] (aldehyde reductase)                           | 1.65 ± 0.18 |
| <i>CMD112C</i> | Unknown hydrolase                                                                         | 1.65 ± 0.27 |
| <i>CML322C</i> | dTMP kinase                                                                               | 1.64 ± 0.06 |
| <i>CMS272C</i> | Isocitrate dehydrogenase (NAD <sup>+</sup> ) subunit 2, mitochondrial precursor           | 1.64 ± 0.14 |
| <i>CMT188C</i> | Similar to KRR1-interacting protein                                                       | 1.64 ± 0.31 |
| <i>CMJ056C</i> | Similar to vesicle transport v-SNARE protein                                              | 1.63 ± 0.20 |
| <i>CMQ463C</i> | 60S ribosomal protein L17                                                                 | 1.63 ± 0.36 |
| <i>CMT048C</i> | Probable de-N-glycosylation enzyme Png1p                                                  | 1.63 ± 0.36 |
| <i>CMQ293C</i> | 60S ribosomal protein L4                                                                  | 1.63 ± 0.21 |
| <i>CML239C</i> | Hypothetical protein                                                                      | 1.63 ± 0.27 |
| <i>CMS462C</i> | Fusion protein of dihydrofolate reductase and thymidylate synthase                        | 1.63 ± 0.13 |
| <i>CMS441C</i> | Hypothetical protein                                                                      | 1.63 ± 0.08 |
| <i>CMJ171C</i> | Hypothetical protein                                                                      | 1.62 ± 0.25 |
| <i>CMT378C</i> | Mitochondrial ribosomal protein L11 precursor                                             | 1.62 ± 0.16 |
| <i>CMO167C</i> | Hypothetical protein                                                                      | 1.62 ± 0.05 |
| <i>CMJ070C</i> | Hypothetical protein                                                                      | 1.62 ± 0.29 |
| <i>CMS100C</i> | Hypothetical protein                                                                      | 1.62 ± 0.03 |
| <i>CMM002C</i> | Hypothetical protein                                                                      | 1.62 ± 0.06 |
| <i>CMN169C</i> | Histone H4                                                                                | 1.61 ± 0.06 |
| <i>CMS193C</i> | Hypothetical protein                                                                      | 1.61 ± 0.10 |
| <i>CMT366C</i> | Hypothetical protein                                                                      | 1.61 ± 0.17 |
| <i>CMD175C</i> | Hypothetical protein                                                                      | 1.61 ± 0.21 |
| <i>CMJ008C</i> | Similar to retinoblastoma-binding protein 5                                               | 1.61 ± 0.14 |
| <i>CMC022C</i> | Probable endoplasmic reticulum oxidoreductin 1-Lbeta (ERO1-L)                             | 1.61 ± 0.29 |
| <i>CMM088C</i> | Probable purine phosphoribosyltransferase                                                 | 1.61 ± 0.26 |
| <i>CMC136C</i> | Probable nucleotide binding protein                                                       | 1.60 ± 0.20 |

|                |                                                                          |             |
|----------------|--------------------------------------------------------------------------|-------------|
| <i>CMH122C</i> | Similar to DNA invertase                                                 | 1.60 ± 0.21 |
| <i>CMD102C</i> | Adaptor-related protein complex 3, sigma subunit                         | 1.60 ± 0.20 |
| <i>CML334C</i> | Hypothetical protein                                                     | 1.60 ± 0.25 |
| <i>CML189C</i> | Hypothetical protein                                                     | 1.59 ± 0.06 |
| <i>CMQ468C</i> | Hypothetical protein                                                     | 1.59 ± 0.29 |
| <i>CMS321C</i> | Probable non-canonical ubiquitin conjugating enzyme                      | 1.59 ± 0.23 |
| <i>CMQ024C</i> | Glutamate-5-semialdehyde dehydrogenase                                   | 1.59 ± 0.27 |
| <i>CMD005C</i> | Similar to Trithorax protein                                             | 1.59 ± 0.20 |
| <i>CMJ033C</i> | Hypothetical protein                                                     | 1.58 ± 0.06 |
| <i>CMT042C</i> | Hypothetical protein                                                     | 1.58 ± 0.21 |
| <i>CMT322C</i> | Chaperonin containing TCP1, subunit 2 (beta)                             | 1.58 ± 0.09 |
| <i>CMK118C</i> | 40S ribosomal protein S12                                                | 1.58 ± 0.07 |
| <i>CMG064C</i> | Cytochrome c oxidase (Complex IV) assembly protein                       | 1.58 ± 0.04 |
| <i>CMF161C</i> | Similar to cleavage and polyadenylation specific factor 4, 30kDa subunit | 1.57 ± 0.07 |
| <i>CMP126C</i> | Similar to 3-oxoacyl-(acyl-carrier-protein) reductase                    | 1.57 ± 0.21 |
| <i>CMP293C</i> | Hypothetical protein                                                     | 1.57 ± 0.07 |
| <i>CMN240C</i> | Hypothetical protein                                                     | 1.56 ± 0.26 |
| <i>CMQ349C</i> | Hypothetical protein                                                     | 1.56 ± 0.19 |
| <i>CMI107C</i> | Similar to 3'-5' exoribonuclease subunit Dis3                            | 1.56 ± 0.18 |
| <i>CMG022C</i> | Hypothetical protein                                                     | 1.56 ± 0.21 |
| <i>CMN267C</i> | Hypothetical protein                                                     | 1.56 ± 0.25 |
| <i>CMF107C</i> | Hypothetical protein                                                     | 1.56 ± 0.07 |
| <i>CMT447C</i> | Hypothetical protein                                                     | 1.56 ± 0.13 |
| <i>CMN018C</i> | Hypothetical protein                                                     | 1.56 ± 0.07 |
| <i>CMM298C</i> | Hypothetical protein                                                     | 1.56 ± 0.26 |
| <i>CMT260C</i> | Hypothetical protein                                                     | 1.56 ± 0.15 |
| <i>CME167C</i> | Hypothetical protein                                                     | 1.56 ± 0.17 |
| <i>CML176C</i> | Hypothetical protein                                                     | 1.55 ± 0.04 |
| <i>CMI030C</i> | Hypothetical protein                                                     | 1.55 ± 0.30 |
| <i>CMS109C</i> | Similar to geranylgeranyl hydrogenase                                    | 1.55 ± 0.36 |
| <i>CMB076C</i> | Similar to histidyl-tRNA synthetase                                      | 1.55 ± 0.09 |
| <i>CMK253C</i> | Probable ubiquitin conjugating enzyme E2                                 | 1.55 ± 0.13 |
| <i>CML161C</i> | Hypothetical protein                                                     | 1.55 ± 0.03 |
| <i>CMI204C</i> | Similar to UMP-CMP kinase                                                | 1.55 ± 0.15 |
| <i>CMI054C</i> | Similar to guanine nucleotide exchanging fractor                         | 1.55 ± 0.15 |
| <i>CMN175C</i> | Similar to cyclin C                                                      | 1.55 ± 0.25 |
| <i>CMM265C</i> | Gamma-glutamyltransferase                                                | 1.55 ± 0.15 |
| <i>CMS503C</i> | Probable ubiquitin-conjugating enzyme E2                                 | 1.54 ± 0.05 |
| <i>CMT380C</i> | tRNA (5-methylaminomethyl-2-thiouridylate)-methyltransferase             | 1.54 ± 0.11 |
| <i>CML219C</i> | Similar to cyclin E2                                                     | 1.54 ± 0.24 |
| <i>CMH197C</i> | Mitochondrial F-type ATPase F1 subunit beta, precursor                   | 1.54 ± 0.34 |
| <i>CMJ023C</i> | Hypothetical protein                                                     | 1.54 ± 0.24 |
| <i>CML162C</i> | Hypothetical protein                                                     | 1.54 ± 0.23 |

|                |                                                                  |             |
|----------------|------------------------------------------------------------------|-------------|
| <i>CMI299C</i> | Serine O-acetyltransferase                                       | 1.53 ± 0.12 |
| <i>CMS101C</i> | Probable proliferating cell nuclear antigen                      | 1.53 ± 0.39 |
| <i>CMQ159C</i> | Hypothetical protein                                             | 1.53 ± 0.20 |
| <i>CMB059C</i> | Aluminum resistance protein                                      | 1.53 ± 0.06 |
| <i>CMM100C</i> | Similar to nuclear receptor binding factor 1                     | 1.53 ± 0.28 |
| <i>CMO287C</i> | 40S ribosomal protein S11                                        | 1.53 ± 0.27 |
| <i>CMH165C</i> | Hypothetical protein                                             | 1.53 ± 0.01 |
| <i>CMT402C</i> | 40S ribosomal protein S17                                        | 1.52 ± 0.22 |
| <i>CMK013C</i> | Hypothetical protein                                             | 1.52 ± 0.31 |
| <i>CML175C</i> | Hypothetical protein                                             | 1.52 ± 0.26 |
| <i>CMB018C</i> | 60S ribosomal protein L18                                        | 1.52 ± 0.24 |
| <i>CMS040C</i> | Hypothetical protein                                             | 1.52 ± 0.26 |
| <i>CMR182C</i> | Hypothetical protein                                             | 1.52 ± 0.25 |
| <i>CMJ159C</i> | Hypothetical protein                                             | 1.52 ± 0.04 |
| <i>CMD174C</i> | Hypothetical protein                                             | 1.52 ± 0.22 |
| <i>CMR377C</i> | Hypothetical protein                                             | 1.52 ± 0.03 |
| <i>CMO149C</i> | 20S core proteasome subunit beta 5                               | 1.52 ± 0.08 |
| <i>CMJ054C</i> | Glutamyl-tRNA reductase                                          | 1.51 ± 0.38 |
| <i>CMS284C</i> | 60S ribosomal protein L12                                        | 1.51 ± 0.09 |
| <i>CMN156C</i> | Hypothetical protein                                             | 1.51 ± 0.33 |
| <i>CMM280C</i> | Hypothetical protein                                             | 1.51 ± 0.10 |
| <i>CMT450C</i> | Similar to nuclear transport factor 2                            | 1.50 ± 0.13 |
| <i>CMJ087C</i> | Probable beta-amylase                                            | 1.50 ± 0.21 |
| <i>CMP300C</i> | Probable pullulanase                                             | 1.50 ± 0.31 |
| <i>CMH021C</i> | Hypothetical protein                                             | 1.50 ± 0.06 |
| <i>CMM139C</i> | Probable arginine deiminase                                      | 1.50 ± 0.13 |
| <i>CML075C</i> | Hypothetical protein                                             | 1.50 ± 0.14 |
| <i>CMH237C</i> | Zinc finger protein                                              | 1.49 ± 0.23 |
| <i>CMP308C</i> | Mitochondrial ribosomal protein L27 precursor                    | 1.49 ± 0.20 |
| <i>CMG125C</i> | Similar to 22 kDa peroxisomal membrane protein PMP22             | 1.49 ± 0.13 |
| <i>CMH240C</i> | Hypothetical protein                                             | 1.49 ± 0.30 |
| <i>CMJ065C</i> | Hypothetical protein                                             | 1.49 ± 0.06 |
| <i>CMT293C</i> | Hypothetical protein                                             | 1.49 ± 0.10 |
| <i>CMC044C</i> | 60S ribosomal protein L44                                        | 1.49 ± 0.18 |
| <i>CMN024C</i> | Hypothetical protein                                             | 1.49 ± 0.31 |
| <i>CMK095C</i> | Hypothetical protein                                             | 1.48 ± 0.35 |
| <i>CME072C</i> | Hypothetical protein                                             | 1.48 ± 0.09 |
| <i>CMS130C</i> | Probable signal peptidase I                                      | 1.48 ± 0.11 |
| <i>CMD098C</i> | Hypothetical protein                                             | 1.48 ± 0.01 |
| <i>CMA082C</i> | 40S ribosomal protein S2                                         | 1.48 ± 0.21 |
| <i>CMK061C</i> | DNA repair and recombination protein reca, chloroplast precursor | 1.48 ± 0.29 |
| <i>CMI047C</i> | Hypothetical protein                                             | 1.48 ± 0.07 |
| <i>CMM252C</i> | Hypothetical protein                                             | 1.48 ± 0.10 |

|                |                                                                                         |             |
|----------------|-----------------------------------------------------------------------------------------|-------------|
| <i>CMK008C</i> | Similar to ubiquitin fusion-degradation protein 1                                       | 1.48 ± 0.22 |
| <i>CMS045C</i> | Proteasome regulatory particle subunit                                                  | 1.48 ± 0.12 |
| <i>CMS429C</i> | Serine-glyoxylate aminotransferase                                                      | 1.48 ± 0.12 |
| <i>CMO178C</i> | Similar to bacterial putative methyl transferase                                        | 1.48 ± 0.29 |
| <i>CMA125C</i> | Similar to Rab11-binding protein                                                        | 1.48 ± 0.24 |
| <i>CME166C</i> | Probable pre-mRNA splicing factor ATP-dependent RNA helicase PRP43                      | 1.47 ± 0.23 |
| <i>CMQ247C</i> | Plasma membrane H <sup>+</sup> -ATPase                                                  | 1.47 ± 0.14 |
| <i>CMJ110C</i> | 60S ribosomal protein L15                                                               | 1.47 ± 0.23 |
| <i>CMH218C</i> | 40S ribosomal protein S4                                                                | 1.47 ± 0.17 |
| <i>CMT234C</i> | Cysteine desulfurase IscS, mitochondrial precursor                                      | 1.47 ± 0.14 |
| <i>CMR096C</i> | Hypothetical protein                                                                    | 1.47 ± 0.08 |
| <i>CMG078C</i> | Hypothetical protein                                                                    | 1.47 ± 0.09 |
| <i>CMT553C</i> | Hypothetical protein                                                                    | 1.47 ± 0.16 |
| <i>CMR145C</i> | Hypothetical protein                                                                    | 1.47 ± 0.24 |
| <i>CMJ170C</i> | 60S ribosomal protein L38                                                               | 1.47 ± 0.02 |
| <i>CMM104C</i> | Mitochondrial processing peptidase beta subunit (Complex III core subunit 1), precursor | 1.47 ± 0.15 |
| <i>CMO111C</i> | Outer mitochondrial membrane protein porin                                              | 1.47 ± 0.09 |
| <i>CMJ219C</i> | Similar to component of oligomeric golgi complex 4                                      | 1.47 ± 0.16 |
| <i>CMK219C</i> | Calmodulin                                                                              | 1.47 ± 0.26 |
| <i>CME126C</i> | Similar to epidermal growth factor receptor substrate 15                                | 1.46 ± 0.06 |
| <i>CMN127C</i> | Mitochondrial F-type ATPase F1 subunit delta, precursor                                 | 1.46 ± 0.20 |
| <i>CMT504C</i> | Alpha-tubulin                                                                           | 1.46 ± 0.08 |
| <i>CMQ251C</i> | Hypothetical protein                                                                    | 1.46 ± 0.22 |
| <i>CMD061C</i> | Hypothetical protein                                                                    | 1.46 ± 0.20 |
| <i>CMM275C</i> | Hypothetical protein                                                                    | 1.46 ± 0.22 |
| <i>CMH036C</i> | O-acetylserine (thiol) lyase 2 (cysteine synthase)                                      | 1.46 ± 0.13 |
| <i>CMR442C</i> | Hypothetical protein                                                                    | 1.45 ± 0.07 |
| <i>CMI128C</i> | Hypothetical protein                                                                    | 1.45 ± 0.24 |
| <i>CMO062C</i> | 60S ribosomal protein L41                                                               | 1.45 ± 0.12 |
| <i>CMP159C</i> | U6 snRNA-associated Sm-like protein LSm5                                                | 1.45 ± 0.20 |
| <i>CMN263C</i> | Beta-tubulin                                                                            | 1.45 ± 0.16 |
| <i>CMR296C</i> | Hypothetical protein                                                                    | 1.45 ± 0.11 |
| <i>CMO304C</i> | Hypothetical protein                                                                    | 1.45 ± 0.21 |
| <i>CMH256C</i> | Squalene monooxygenase                                                                  | 1.45 ± 0.20 |
| <i>CMC176C</i> | Similar to HERC2                                                                        | 1.45 ± 0.08 |
| <i>CMT119C</i> | Inorganic pyrophosphatase fused with fructose-1,6-bisphosphatase                        | 1.45 ± 0.08 |
| <i>CMJ125C</i> | 40S ribosomal protein S9                                                                | 1.44 ± 0.16 |
| <i>CMT124C</i> | Hypothetical protein                                                                    | 1.44 ± 0.12 |
| <i>CML157C</i> | Chloroplast pre-mRNA splicing protein Mbb1                                              | 1.44 ± 0.18 |
| <i>CMC088C</i> | Hypothetical protein                                                                    | 1.44 ± 0.17 |
| <i>CMQ211C</i> | Adenylosuccinate lyase                                                                  | 1.44 ± 0.07 |
| <i>CMK291C</i> | Delta12 fatty acid desaturase, chloroplast or ER                                        | 1.44 ± 0.25 |
| <i>CMB015C</i> | Probable ubiquitin-conjugating enzyme E2                                                | 1.44 ± 0.03 |

|                |                                                                                     |             |
|----------------|-------------------------------------------------------------------------------------|-------------|
| <i>CMS144C</i> | TATA-box binding protein-associated factor 12                                       | 1.44 ± 0.05 |
| <i>CMM257C</i> | Hypothetical protein                                                                | 1.44 ± 0.10 |
| <i>CMM039C</i> | Hypothetical protein                                                                | 1.44 ± 0.29 |
| <i>CMI154C</i> | Hypothetical protein                                                                | 1.44 ± 0.17 |
| <i>CMI195C</i> | Hypothetical protein                                                                | 1.43 ± 0.13 |
| <i>CMJ279C</i> | Hypothetical protein                                                                | 1.43 ± 0.07 |
| <i>CMO305C</i> | Similar to adipocyte-specific protein 4                                             | 1.43 ± 0.17 |
| <i>CMM140C</i> | Similar to alpha-hemolysin                                                          | 1.43 ± 0.17 |
| <i>CMT131C</i> | Probable RNA helicase with DEAD box                                                 | 1.43 ± 0.32 |
| <i>CML264C</i> | Hypothetical protein                                                                | 1.43 ± 0.03 |
| <i>CMT197C</i> | 40S ribosomal protein S27                                                           | 1.43 ± 0.07 |
| <i>CMP012C</i> | 60S ribosomal protein L34                                                           | 1.43 ± 0.19 |
| <i>CMQ380C</i> | Similar to COPII coated vesicle component Sec24                                     | 1.43 ± 0.23 |
| <i>CMC076C</i> | Similar to Na <sup>+</sup> -translocating NADH:quinone oxidoreductase, subunit Nqr6 | 1.43 ± 0.04 |
| <i>CMP138C</i> | U6 snRNA-associated Sm-like protein LSm6                                            | 1.43 ± 0.13 |
| <i>CMQ148C</i> | Trehalose-phosphatase                                                               | 1.42 ± 0.21 |
| <i>CMR399C</i> | Similar to pyrazinamidase/nicotinamidase                                            | 1.42 ± 0.11 |
| <i>CMP031C</i> | Hypothetical protein                                                                | 1.42 ± 0.15 |
| <i>CMS304C</i> | Probable ubiquitin conjugating enzyme E2                                            | 1.42 ± 0.12 |
| <i>CMQ152C</i> | Hypothetical protein                                                                | 1.42 ± 0.31 |
| <i>CMR340C</i> | Similar to procollagen (type III) N-endopeptidase                                   | 1.42 ± 0.07 |
| <i>CMQ111C</i> | Meiotic DNA topoisomerase VI subunit A                                              | 1.42 ± 0.12 |
| <i>CMO238C</i> | Hypothetical protein                                                                | 1.42 ± 0.07 |
| <i>CMS015C</i> | Hypothetical protein                                                                | 1.42 ± 0.05 |
| <i>CMQ138C</i> | Hypothetical protein                                                                | 1.42 ± 0.06 |
| <i>CMQ074C</i> | Small GTP-binding protein Arf1                                                      | 1.42 ± 0.27 |
| <i>CMG215C</i> | Cytochrome c reductase (Complex III) hinge protein                                  | 1.42 ± 0.13 |
| <i>CMN208C</i> | 20S core proteasome subunit alpha 1                                                 | 1.42 ± 0.17 |
| <i>CMQ106C</i> | Hypothetical protein                                                                | 1.42 ± 0.16 |
| <i>CMF021C</i> | Hypothetical protein                                                                | 1.42 ± 0.02 |
| <i>CMJ078C</i> | Probable prohibitin                                                                 | 1.41 ± 0.22 |
| <i>CMF076C</i> | Similar to DnaJ protein                                                             | 1.41 ± 0.31 |
| <i>CMN315C</i> | 60S ribosomal protein L37A                                                          | 1.41 ± 0.18 |
| <i>CMP311C</i> | TBP-1 interacting protein                                                           | 1.41 ± 0.15 |
| <i>CMT227C</i> | Carboxyl-terminal processing protease                                               | 1.41 ± 0.13 |
| <i>CMT636C</i> | Similar to membrane-bound alpha-1,6-mannosyltransferase                             | 1.41 ± 0.23 |
| <i>CMK045C</i> | Pseudouridine synthase 3                                                            | 1.41 ± 0.12 |
| <i>CML299C</i> | Hypothetical protein                                                                | 1.41 ± 0.11 |
| <i>CMK136C</i> | Hypothetical protein                                                                | 1.41 ± 0.19 |
| <i>CML020C</i> | Hypothetical protein                                                                | 1.41 ± 0.07 |
| <i>CMM176C</i> | Hypothetical protein                                                                | 1.41 ± 0.30 |
| <i>CMS157C</i> | Hypothetical protein                                                                | 1.41 ± 0.40 |
| <i>CMA060C</i> | Hypothetical protein                                                                | 1.41 ± 0.26 |



|                |                                                                      |             |
|----------------|----------------------------------------------------------------------|-------------|
| <i>CMD031C</i> | Probable arginine methyltransferase (pam1)                           | 1.41 ± 0.23 |
| <i>CMB060C</i> | Hypothetical protein                                                 | 1.40 ± 0.19 |
| <i>CMM152C</i> | Similar to ribonuclease P subunit RPP1                               | 1.40 ± 0.03 |
| <i>CMI232C</i> | Hypothetical protein                                                 | 1.40 ± 0.30 |
| <i>CMT209C</i> | Succinate--CoA ligase (ADP- or GDP-forming), mitochondrial precursor | 1.40 ± 0.13 |
| <i>CMT492C</i> | Similar to 3-methyladenine DNA glycosylase alka                      | 1.40 ± 0.05 |
| <i>CMQ056C</i> | RNA polymerase I, II, III common subunit                             | 1.40 ± 0.13 |
| <i>CMO290C</i> | ssra RNA (tmRNA)-binding protein, small protein B                    | 1.40 ± 0.15 |
| <i>CME055C</i> | ATP-dependent Zn protease FtsH2                                      | 1.40 ± 0.14 |
| <i>CME114C</i> | Hypothetical protein                                                 | 1.40 ± 0.05 |
| <i>CMR210C</i> | Hypothetical protein                                                 | 1.40 ± 0.24 |
| <i>CMH024C</i> | Chloroplast peptide chain release factor RF-1                        | 1.40 ± 0.16 |
| <i>CMT034C</i> | Glyceraldehyde-3-phosphate dehydrogenase (GAPN)                      | 1.40 ± 0.25 |
| <i>CMO357C</i> | Similar to ER membrane protein; Hsd1p                                | 1.40 ± 0.05 |
| <i>CMG051C</i> | Similar to sucrose-phosphate synthase                                | 1.40 ± 0.15 |
| <i>CMM196C</i> | Pyrophosphate--fructose-6-phosphate 1-phosphotransferase             | 1.39 ± 0.09 |
| <i>CMG094C</i> | Hypothetical protein                                                 | 1.39 ± 0.09 |
| <i>CMQ014C</i> | Hypothetical protein                                                 | 1.39 ± 0.22 |
| <i>CMN213C</i> | Similar to molybdenum cofactor biosynthesis protein C (moac)         | 1.39 ± 0.04 |
| <i>CMC140C</i> | Hypothetical protein                                                 | 1.39 ± 0.22 |
| <i>CML153C</i> | Hypothetical protein                                                 | 1.39 ± 0.07 |
| <i>CMN048C</i> | N-acetyl-gamma-glutamyl-phosphate reductase                          | 1.39 ± 0.31 |
| <i>CML171C</i> | Hypothetical protein                                                 | 1.39 ± 0.23 |
| <i>CMH138C</i> | Pantoate--beta-alanine ligase                                        | 1.39 ± 0.08 |
| <i>CMA098C</i> | Deoxyhypusine synthase                                               | 1.39 ± 0.13 |
| <i>CMH261C</i> | Similar to ribose methyltransferase                                  | 1.38 ± 0.10 |
| <i>CMR502C</i> | Hypothetical protein                                                 | 1.38 ± 0.12 |
| <i>CMJ108C</i> | Hypothetical protein                                                 | 1.38 ± 0.26 |
| <i>CMK137C</i> | Hypothetical protein                                                 | 1.38 ± 0.13 |
| <i>CMM216C</i> | Hypothetical protein                                                 | 1.38 ± 0.16 |
| <i>CMR323C</i> | Hypothetical protein                                                 | 1.38 ± 0.14 |
| <i>CMQ181C</i> | Hypothetical protein                                                 | 1.38 ± 0.05 |
| <i>CMF152C</i> | 3-hydroxyanthranilate 3,4-dioxygenase                                | 1.38 ± 0.09 |
| <i>CML284C</i> | 4-hydroxy-3-methylbut-2-en-1-yl diphosphate synthase                 | 1.38 ± 0.14 |
| <i>CML052C</i> | Hypothetical protein                                                 | 1.38 ± 0.24 |
| <i>CML211C</i> | Hypothetical protein                                                 | 1.37 ± 0.19 |
| <i>CMQ388C</i> | Similar to DNA/RNA-binding protein translin/TB-RBP                   | 1.37 ± 0.12 |
| <i>CMQ234C</i> | Dihydrolipoamide dehydrogenase                                       | 1.37 ± 0.21 |
| <i>CMF016C</i> | Hypothetical protein                                                 | 1.37 ± 0.07 |
| <i>CML221C</i> | Hypothetical protein                                                 | 1.37 ± 0.19 |
| <i>CMS241C</i> | Hypothetical protein                                                 | 1.37 ± 0.05 |
| <i>CMR232C</i> | RNA polymerase I, II, III common subunit                             | 1.37 ± 0.22 |
| <i>CMF032C</i> | Hypothetical protein                                                 | 1.37 ± 0.15 |

|                |                                                                                                        |             |
|----------------|--------------------------------------------------------------------------------------------------------|-------------|
| <i>CMR175C</i> | Hypothetical protein                                                                                   | 1.37 ± 0.08 |
| <i>CME177C</i> | Hypothetical protein                                                                                   | 1.37 ± 0.04 |
| <i>CMI149C</i> | Hypothetical protein                                                                                   | 1.37 ± 0.04 |
| <i>CMC053C</i> | 60S ribosomal protein L35                                                                              | 1.37 ± 0.24 |
| <i>CME051C</i> | Hypothetical protein                                                                                   | 1.37 ± 0.25 |
| <i>CMT410C</i> | 40S ribosomal protein SA (P40)                                                                         | 1.37 ± 0.12 |
| <i>CMT264C</i> | Probable iron-sulfur cluster assembly protein IscA                                                     | 1.37 ± 0.11 |
| <i>CMN198C</i> | Galactokinase                                                                                          | 1.37 ± 0.17 |
| <i>CMI152C</i> | Hypothetical protein                                                                                   | 1.37 ± 0.03 |
| <i>CMO032C</i> | Hypothetical protein                                                                                   | 1.37 ± 0.18 |
| <i>CME185C</i> | Hypothetical protein                                                                                   | 1.36 ± 0.16 |
| <i>CMO191C</i> | Hypothetical protein                                                                                   | 1.36 ± 0.10 |
| <i>CMP314C</i> | Similar to tyrosine phosphatase Oca1p                                                                  | 1.36 ± 0.11 |
| <i>CMQ323C</i> | V-type ATPase V0 subunit c                                                                             | 1.36 ± 0.26 |
| <i>CMQ091C</i> | Hypothetical protein                                                                                   | 1.36 ± 0.20 |
| <i>CMS435C</i> | Hypothetical protein                                                                                   | 1.36 ± 0.02 |
| <i>CMS178C</i> | Trehalose-phosphatase                                                                                  | 1.36 ± 0.21 |
| <i>CME091C</i> | Hypothetical protein                                                                                   | 1.36 ± 0.10 |
| <i>CMS329C</i> | Similar to 3-beta hydroxysteroid dehydrogenase/isomerase family                                        | 1.36 ± 0.07 |
| <i>CMQ253C</i> | MYB-related protein                                                                                    | 1.36 ± 0.40 |
| <i>CMH128C</i> | Cyclin dependent kinase, B-type                                                                        | 1.36 ± 0.05 |
| <i>CMR383C</i> | Hypothetical protein                                                                                   | 1.36 ± 0.20 |
| <i>CMS283C</i> | Hypothetical protein                                                                                   | 1.36 ± 0.04 |
| <i>CMS296C</i> | Probable C-4 sterol methyl oxidase                                                                     | 1.36 ± 0.15 |
| <i>CMC145C</i> | 60S ribosomal protein L9                                                                               | 1.36 ± 0.20 |
| <i>CMK193C</i> | Smt3-conjugating enzyme E2                                                                             | 1.36 ± 0.17 |
| <i>CMN264C</i> | Phosphoribosylformylglycinamide cyclo-ligase (phosphoribosyl-aminoimidazole synthetase) (AIR synthase) | 1.36 ± 0.09 |
| <i>CMD080C</i> | Phosphatidylinositol polyphosphate 5-phosphatase                                                       | 1.36 ± 0.06 |
| <i>CMK204C</i> | Similar to iron-sulfur cluster scaffold protein                                                        | 1.35 ± 0.07 |
| <i>CMS211C</i> | Similar to D-aminoacid oxidoreductase, DadA                                                            | 1.35 ± 0.15 |
| <i>CMT407C</i> | Hypothetical protein                                                                                   | 1.35 ± 0.06 |
| <i>CMO131C</i> | Hypothetical protein                                                                                   | 1.35 ± 0.16 |
| <i>CML118C</i> | Hypothetical protein                                                                                   | 1.35 ± 0.09 |
| <i>CMO027C</i> | Hypothetical protein                                                                                   | 1.35 ± 0.20 |
| <i>CMC028C</i> | Similar to F-box only protein 9                                                                        | 1.35 ± 0.02 |
| <i>CMF155C</i> | Hypothetical protein                                                                                   | 1.35 ± 0.20 |
| <i>CMO101C</i> | DnaJ (Hsp40) homolog, subfamily B                                                                      | 1.35 ± 0.21 |
| <i>CMG012C</i> | Hypothetical protein                                                                                   | 1.35 ± 0.08 |
| <i>CMT199C</i> | Hypothetical protein                                                                                   | 1.35 ± 0.11 |
| <i>CMT282C</i> | Hypothetical protein                                                                                   | 1.34 ± 0.15 |
| <i>CMM305C</i> | Hypothetical protein                                                                                   | 1.34 ± 0.31 |
| <i>CMN059C</i> | Similar to COP9 signalosome subunit Csn5                                                               | 1.34 ± 0.18 |
| <i>CME179C</i> | Dihydrodipicolinate synthase                                                                           | 1.34 ± 0.12 |

|                |                                                                                              |             |
|----------------|----------------------------------------------------------------------------------------------|-------------|
| <i>CMH235C</i> | ATP-binding cassette, sub-family A                                                           | 1.34 ± 0.27 |
| <i>CMC146C</i> | Phospholipase A2-activating protein                                                          | 1.34 ± 0.04 |
| <i>CME145C</i> | Fructose-1,6-biphosphate aldolase                                                            | 1.34 ± 0.20 |
| <i>CMI156C</i> | 26S proteasome ATP-dependent regulatory subunit                                              | 1.34 ± 0.02 |
| <i>CML124C</i> | Similar to dual-specificity protein phosphatase                                              | 1.34 ± 0.16 |
| <i>CMQ414C</i> | Hypothetical protein                                                                         | 1.34 ± 0.12 |
| <i>CMG067C</i> | Similar to mitochondrial carrier Yel006N                                                     | 1.33 ± 0.09 |
| <i>CMS174C</i> | Hypothetical protein                                                                         | 1.33 ± 0.21 |
| <i>CMJ260C</i> | Similar to prenylated rab acceptor PRA1                                                      | 1.33 ± 0.19 |
| <i>CMM111C</i> | Eukaryotic petide chain release factor erf subunit 1                                         | 1.33 ± 0.32 |
| <i>CMH210C</i> | Similar to peptidyl-prolyl cis-trans isomerase Ess1p                                         | 1.33 ± 0.22 |
| <i>CMF025C</i> | Hypothetical protein                                                                         | 1.33 ± 0.01 |
| <i>CME019C</i> | Dynamin-related protein involved in mitochondrial division CmDnm1/DRP3                       | 1.33 ± 0.07 |
| <i>CMH266C</i> | Hypothetical protein                                                                         | 1.33 ± 0.03 |
| <i>CMT426C</i> | Similar to Bax inhibitor-1 (suppressor of BAX induced cell death)                            | 1.33 ± 0.10 |
| <i>CMO261C</i> | Hypothetical protein                                                                         | 1.33 ± 0.18 |
| <i>CMF078C</i> | 26S proteasome ATP-dependent regulatory subunit                                              | 1.33 ± 0.22 |
| <i>CMT156C</i> | Hypothetical protein                                                                         | 1.33 ± 0.09 |
| <i>CMC043C</i> | Glutathione reductase                                                                        | 1.33 ± 0.29 |
| <i>CMD024C</i> | Ribosomal large subunit pseudouridine synthase A                                             | 1.33 ± 0.06 |
| <i>CMJ188C</i> | Similar to probable RUBISCO expression protein cbby                                          | 1.33 ± 0.06 |
| <i>CMS457C</i> | Hypothetical protein                                                                         | 1.32 ± 0.06 |
| <i>CMR095C</i> | Similar to proline transport helper PTH1                                                     | 1.32 ± 0.20 |
| <i>CMT630C</i> | Hypothetical protein                                                                         | 1.32 ± 0.05 |
| <i>CMJ178C</i> | Similar to ribulose-1,5 bisphosphate carboxylase/oxygenase large subunit N-methyltransferase | 1.32 ± 0.17 |
| <i>CMC137C</i> | 3-hydroxybutyryl-CoA dehydrogenase                                                           | 1.32 ± 0.16 |
| <i>CMT198C</i> | NADH dehydrogenase I (Complex I) alpha subcomplex 5 (B13)                                    | 1.32 ± 0.05 |
| <i>CMC099C</i> | NADH dehydrogenase I (Complex I) beta subcomplex 7 (B18)                                     | 1.32 ± 0.07 |
| <i>CMS425C</i> | NADH-dependent hydroxypyruvate reductase                                                     | 1.32 ± 0.14 |
| <i>CML310C</i> | BTF3-like transcription factor                                                               | 1.32 ± 0.24 |
| <i>CML067C</i> | Hypothetical protein                                                                         | 1.32 ± 0.15 |
| <i>CME015C</i> | Methionine--tRNA ligase, chloroplast or mitochondrial                                        | 1.31 ± 0.16 |
| <i>CML300C</i> | Hypothetical protein                                                                         | 1.31 ± 0.10 |
| <i>CMP165C</i> | Hypothetical protein                                                                         | 1.31 ± 0.02 |
| <i>CMS368C</i> | DNA repair protein RAD52                                                                     | 1.31 ± 0.06 |
| <i>CMT539C</i> | Hypothetical protein                                                                         | 1.31 ± 0.25 |
| <i>CML055C</i> | Carbamoyl-phosphate synthase, pyrimidine-specific, large chain                               | 1.31 ± 0.36 |
| <i>CME065C</i> | Hypothetical protein                                                                         | 1.31 ± 0.04 |
| <i>CMP227C</i> | Probable ferritin, chloroplast precursor                                                     | 1.31 ± 0.12 |
| <i>CMJ167C</i> | Hypothetical protein                                                                         | 1.31 ± 0.09 |
| <i>CMS389C</i> | Hypothetical protein                                                                         | 1.31 ± 0.12 |
| <i>CMF127C</i> | Similar to DNA polymerase alpha subunit                                                      | 1.31 ± 0.13 |
| <i>CMN164C</i> | Hypothetical protein                                                                         | 1.31 ± 0.04 |

|                |                                                                            |             |
|----------------|----------------------------------------------------------------------------|-------------|
| <i>CMH239C</i> | Hypothetical protein                                                       | 1.31 ± 0.08 |
| <i>CMD155C</i> | Hypothetical protein                                                       | 1.31 ± 0.09 |
| <i>CMN293C</i> | Hypothetical protein                                                       | 1.31 ± 0.29 |
| <i>CMQ063C</i> | Hypothetical protein                                                       | 1.31 ± 0.09 |
| <i>CMP307C</i> | Similar to Reg receptor                                                    | 1.31 ± 0.10 |
| <i>CMI076C</i> | Hypothetical protein                                                       | 1.30 ± 0.03 |
| <i>CMT340C</i> | Hypothetical protein                                                       | 1.30 ± 0.05 |
| <i>CMC108C</i> | Hypothetical protein                                                       | 1.30 ± 0.19 |
| <i>CMT529C</i> | Similar to DNA repair protein Rad17-like protein                           | 1.30 ± 0.11 |
| <i>CMR433C</i> | Probable DEAD/DEAH box RNA helicase                                        | 1.30 ± 0.10 |
| <i>CMT086C</i> | Probable isopentenyl diphosphate isomerase                                 | 1.30 ± 0.17 |
| <i>CMS424C</i> | Glutamate N-acetyltransferase/amino-acid N-acetyltransferase               | 1.30 ± 0.19 |
| <i>CML308C</i> | Hypothetical protein                                                       | 1.30 ± 0.17 |
| <i>CMD113C</i> | Glycerol-3-phosphate dehydrogenase                                         | 1.30 ± 0.13 |
| <i>CMG076C</i> | Hypothetical protein                                                       | 1.30 ± 0.16 |
| <i>CMG071C</i> | Hypothetical protein                                                       | 1.30 ± 0.04 |
| <i>CME029C</i> | Chromosome condensation protein SMC4                                       | 1.30 ± 0.13 |
| <i>CMF053C</i> | Similar to hormone-sensitive lipase                                        | 1.30 ± 0.13 |
| <i>CMS362C</i> | 9-cis-epoxycarotenoid dioxygenase, neoxanthin cleavage enzyme-like protein | 1.29 ± 0.09 |
| <i>CMA005C</i> | Calcium-binding mitochondrial carrier Aralar                               | 1.29 ± 0.03 |
| <i>CMQ371C</i> | Hypothetical protein                                                       | 1.29 ± 0.13 |
| <i>CMQ453C</i> | Probable blue light photoreceptor cryptochrome                             | 1.29 ± 0.19 |
| <i>CML297C</i> | Hypothetical protein                                                       | 1.29 ± 0.15 |
| <i>CMS139C</i> | Hypothetical protein                                                       | 1.29 ± 0.10 |
| <i>CMT021C</i> | Similar to AKIN beta2 (protein kinase)                                     | 1.29 ± 0.14 |
| <i>CMO346C</i> | Similar to fatty acid hydroxylase (FAH1)                                   | 1.29 ± 0.15 |
| <i>CMF007C</i> | Hypothetical protein                                                       | 1.29 ± 0.07 |
| <i>CMK224C</i> | Hypothetical protein                                                       | 1.29 ± 0.14 |
| <i>CMA136C</i> | Hypothetical protein                                                       | 1.29 ± 0.07 |
| <i>CMT030C</i> | 40S ribosomal protein S30                                                  | 1.29 ± 0.07 |
| <i>CMH172C</i> | Hypothetical protein                                                       | 1.29 ± 0.08 |
| <i>CMJ085C</i> | Hypothetical protein                                                       | 1.29 ± 0.02 |
| <i>CMF030C</i> | Hypothetical protein                                                       | 1.29 ± 0.17 |
| <i>CMK196C</i> | Hypothetical protein                                                       | 1.29 ± 0.03 |
| <i>CMJ020C</i> | Hypothetical protein                                                       | 1.29 ± 0.12 |
| <i>CMB098C</i> | Hypothetical protein                                                       | 1.29 ± 0.19 |
| <i>CMP175C</i> | 60S ribosomal protein L31                                                  | 1.28 ± 0.14 |
| <i>CMJ185C</i> | NADH dehydrogenase I (Complex I) flavoprotein 51kDa subunit                | 1.28 ± 0.03 |
| <i>CMP133C</i> | Hypothetical protein                                                       | 1.28 ± 0.13 |
| <i>CMI112C</i> | Similar to peroxiredoxin Q                                                 | 1.28 ± 0.06 |
| <i>CML140C</i> | RNA helicase                                                               | 1.28 ± 0.18 |
| <i>CMJ265C</i> | Hypothetical protein                                                       | 1.28 ± 0.15 |
| <i>CME020C</i> | Hypothetical protein                                                       | 1.28 ± 0.19 |

|                |                                                                                         |             |
|----------------|-----------------------------------------------------------------------------------------|-------------|
| <i>CMN009C</i> | Hypothetical protein                                                                    | 1.28 ± 0.31 |
| <i>CME082C</i> | Similar to cell division cycle protein CDC6                                             | 1.28 ± 0.09 |
| <i>CMP080C</i> | Hypothetical protein                                                                    | 1.28 ± 0.29 |
| <i>CMO116C</i> | Hypothetical protein                                                                    | 1.28 ± 0.06 |
| <i>CMT383C</i> | Hypothetical protein                                                                    | 1.28 ± 0.04 |
| <i>CMT384C</i> | Adenylate kinase                                                                        | 1.28 ± 0.19 |
| <i>CMT434C</i> | Mitochondrial F-type ATPase F1 subunit alpha, precursor                                 | 1.27 ± 0.03 |
| <i>CMF122C</i> | Similar to nitrogen fixation associated protein HesB                                    | 1.27 ± 0.07 |
| <i>CMF079C</i> | Hypothetical protein                                                                    | 1.27 ± 0.04 |
| <i>CMR024C</i> | Transcription antiterminator protein, probably for organellar transcription             | 1.27 ± 0.04 |
| <i>CMR188C</i> | NADH dehydrogenase I (Complex I) flavoprotein 24kDa subunit                             | 1.27 ± 0.15 |
| <i>CMQ170C</i> | Hypothetical protein                                                                    | 1.27 ± 0.03 |
| <i>CMR285C</i> | Mitochondrial ribosomal protein L18                                                     | 1.27 ± 0.09 |
| <i>CMT582C</i> | Succinate dehydrogenase (Complex II) flavoprotein subunit precursor                     | 1.27 ± 0.05 |
| <i>CMT031C</i> | Hypothetical protein                                                                    | 1.27 ± 0.01 |
| <i>CMP286C</i> | Hypothetical protein                                                                    | 1.27 ± 0.07 |
| <i>CMS380C</i> | Hypothetical protein                                                                    | 1.27 ± 0.03 |
| <i>CMH022C</i> | Ruvb-like DNA/RNA helicase pontin                                                       | 1.27 ± 0.01 |
| <i>CMT392C</i> | Hypothetical protein                                                                    | 1.27 ± 0.18 |
| <i>CMS228C</i> | Similar to monoglyceride lipase                                                         | 1.27 ± 0.17 |
| <i>CMT468C</i> | Hypothetical protein                                                                    | 1.27 ± 0.24 |
| <i>CMK251C</i> | Probable DNA repair protein rada                                                        | 1.27 ± 0.23 |
| <i>CMB042C</i> | Hypothetical protein                                                                    | 1.27 ± 0.05 |
| <i>CMD157C</i> | Hypothetical protein                                                                    | 1.26 ± 0.18 |
| <i>CMQ221C</i> | Probable polyadenylation factor I subunit 2 Pfs2p                                       | 1.26 ± 0.03 |
| <i>CMJ057C</i> | 60S ribosomal protein L19                                                               | 1.26 ± 0.01 |
| <i>CMH254C</i> | Hypothetical protein                                                                    | 1.26 ± 0.05 |
| <i>CME095C</i> | Phosphoenolpyruvate carboxylase                                                         | 1.26 ± 0.11 |
| <i>CMN262C</i> | Dynammin-related protein involved in chloroplast division CmDnm2/DRP5                   | 1.26 ± 0.16 |
| <i>CMK220C</i> | Hypothetical protein                                                                    | 1.26 ± 0.11 |
| <i>CMJ013C</i> | Similar to CCR4-NOT transcription complex, subunit 2; NOT2                              | 1.26 ± 0.10 |
| <i>CMC106C</i> | Hypothetical protein                                                                    | 1.26 ± 0.17 |
| <i>CMT195C</i> | SWI/SNF related, matrix associated, actin dependent regulator of chromatin, subfamily d | 1.26 ± 0.24 |
| <i>CMJ211C</i> | NADH dehydrogenase I (Complex I) iron-sulfur protein 49kDa subunit                      | 1.26 ± 0.06 |
| <i>CMQ308C</i> | Hypothetical protein                                                                    | 1.26 ± 0.09 |
| <i>CML173C</i> | Hypothetical protein                                                                    | 1.26 ± 0.11 |
| <i>CMH025C</i> | Hypothetical protein                                                                    | 1.26 ± 0.05 |
| <i>CMR165C</i> | Sigma subunit for chloroplast RNA polymerase                                            | 1.26 ± 0.10 |
| <i>CMJ207C</i> | Similar to calcium-binding protein MO25                                                 | 1.26 ± 0.03 |
| <i>CME186C</i> | Long chain acyl-CoA synthetase                                                          | 1.26 ± 0.04 |
| <i>CMN202C</i> | Hypothetical protein                                                                    | 1.26 ± 0.15 |
| <i>CMI121C</i> | Similar to leucine-rich repeats containing F-box protein                                | 1.26 ± 0.23 |
| <i>CMS191C</i> | Similar to methyltransferase                                                            | 1.25 ± 0.23 |

|                |                                                                                     |             |
|----------------|-------------------------------------------------------------------------------------|-------------|
| <i>CMP171C</i> | Hypothetical protein                                                                | 1.25 ± 0.04 |
| <i>CMH017C</i> | RNA polymerase I, II, III common subunit                                            | 1.25 ± 0.25 |
| <i>CMN268C</i> | Probable carotenoid cis-trans isomerase, CrtH                                       | 1.25 ± 0.11 |
| <i>CMG009C</i> | Similar to glucose inhibited division protein B (gidB)                              | 1.25 ± 0.08 |
| <i>CMR439C</i> | Hypothetical protein                                                                | 1.25 ± 0.16 |
| <i>CMR153C</i> | Similar to BEL1-related homeotic protein                                            | 1.25 ± 0.16 |
| <i>CME034C</i> | Similar to calmodulin                                                               | 1.25 ± 0.02 |
| <i>CMR036C</i> | Myo-inositol 1-phosphate synthase                                                   | 1.25 ± 0.25 |
| <i>CMO159C</i> | Unknown WD repeat protein                                                           | 1.25 ± 0.11 |
| <i>CME038C</i> | Hypothetical protein                                                                | 1.25 ± 0.26 |
| <i>CMT391C</i> | Hypothetical protein                                                                | 1.25 ± 0.08 |
| <i>CML177C</i> | Hypothetical protein                                                                | 1.25 ± 0.19 |
| <i>CMI192C</i> | 14S cohesin SMC1 subunit; SMC protein                                               | 1.25 ± 0.12 |
| <i>CMC015C</i> | Similar to biotin carboxyl carrier protein of acetyl-CoA carboxylase                | 1.25 ± 0.23 |
| <i>CMC046C</i> | Hypothetical protein                                                                | 1.25 ± 0.04 |
| <i>CMM258C</i> | Similar to longevity assurance protein LAG1                                         | 1.24 ± 0.07 |
| <i>CMB073C</i> | Similar to ribosome assembly protein RRB1                                           | 1.24 ± 0.05 |
| <i>CMT023C</i> | Similar to nucleolar-matrix protein with nucleic-acid binding properties, subunit 6 | 1.24 ± 0.05 |
| <i>CMH045C</i> | Hypothetical protein                                                                | 1.24 ± 0.13 |
| <i>CMO125C</i> | Phosphomethylpyrimidine kinase (hmp-phosphate kinase) (hmp-P kinase)                | 1.24 ± 0.13 |
| <i>CMT113C</i> | Probable phosphoribosyl diphosphate synthetase; ribose-phosphate pyrophosphokinase  | 1.24 ± 0.32 |
| <i>CMT103C</i> | Probable glutathione-S-transferase                                                  | 1.24 ± 0.21 |
| <i>CMI067C</i> | 40S ribosomal protein S29                                                           | 1.24 ± 0.06 |
| <i>CMO160C</i> | Similar to archease                                                                 | 1.24 ± 0.19 |
| <i>CML040C</i> | Uroporphyrinogen III synthase                                                       | 1.24 ± 0.08 |
| <i>CMS501C</i> | Similar to mitochondrial carrier precursor                                          | 1.24 ± 0.13 |
| <i>CMO321C</i> | Hypothetical protein                                                                | 1.24 ± 0.04 |
| <i>CMR324C</i> | Hypothetical protein                                                                | 1.24 ± 0.18 |
| <i>CMK105C</i> | Hypothetical protein                                                                | 1.24 ± 0.11 |
| <i>CMT551C</i> | Hypothetical protein                                                                | 1.24 ± 0.05 |
| <i>CMT588C</i> | 4-hydroxybenzoate octaprenyltransferase                                             | 1.24 ± 0.06 |
| <i>CML222C</i> | Hypothetical protein                                                                | 1.24 ± 0.16 |
| <i>CML129C</i> | Similar to v-SNARE protein of ER-Golgi docking complex                              | 1.24 ± 0.13 |
| <i>CMM146C</i> | Probable inosine triphosphatase                                                     | 1.24 ± 0.09 |
| <i>CMN203C</i> | Cytochrome c reductase (Complex III) Rieske iron-sulfur subunit                     | 1.24 ± 0.15 |
| <i>CMM113C</i> | Similar to inorganic phosphate transporter                                          | 1.24 ± 0.11 |
| <i>CME171C</i> | Similar to ring finger protein                                                      | 1.24 ± 0.21 |
| <i>CMI059C</i> | 40S ribosomal protein S23                                                           | 1.24 ± 0.16 |
| <i>CMS112C</i> | Similar to origin recognition complex subunit 1                                     | 1.24 ± 0.13 |
| <i>CMI032C</i> | Hypothetical protein                                                                | 1.24 ± 0.17 |
| <i>CMO171C</i> | Hypothetical protein                                                                | 1.24 ± 0.22 |
| <i>CMM208C</i> | Hypothetical protein                                                                | 1.24 ± 0.18 |
| <i>CMQ118C</i> | 60S ribosomal protein L39                                                           | 1.24 ± 0.02 |

|                |                                                      |             |
|----------------|------------------------------------------------------|-------------|
| <i>CME071C</i> | Hypothetical protein                                 | 1.24 ± 0.09 |
| <i>CMO250C</i> | Phycocyanin-associated rod linker protein, fragment  | 1.24 ± 0.07 |
| <i>CMR014C</i> | Glucose-6-phosphate 1-dehydrogenase                  | 1.24 ± 0.12 |
| <i>CMI102C</i> | Hypothetical protein                                 | 1.24 ± 0.08 |
| <i>CMN218C</i> | Similar to maf protein                               | 1.24 ± 0.09 |
| <i>CMQ199C</i> | Diacyl-glycerol acyltransferase                      | 1.24 ± 0.03 |
| <i>CMM005C</i> | Probable protein kinase CK2 regulatory subunit CK2B1 | 1.23 ± 0.06 |
| <i>CMT270C</i> | Hypothetical protein                                 | 1.23 ± 0.16 |
| <i>CMJ014C</i> | Mercuric reductase                                   | 1.23 ± 0.11 |
| <i>CMN183C</i> | Similar to histone H1                                | 1.23 ± 0.04 |
| <i>CMQ447C</i> | Hypothetical protein                                 | 1.23 ± 0.11 |
| <i>CMG080C</i> | Hypothetical protein                                 | 1.23 ± 0.26 |
| <i>CMM288C</i> | Similar to magnesium transporter Mrs2p               | 1.23 ± 0.03 |
| <i>CMQ009C</i> | Hypothetical protein                                 | 1.23 ± 0.07 |
| <i>CMG195C</i> | Hypothetical protein                                 | 1.23 ± 0.05 |
| <i>CMI111C</i> | Probable phytochelatin synthase                      | 1.23 ± 0.16 |
| <i>CMM121C</i> | Hypothetical protein                                 | 1.23 ± 0.04 |
| <i>CMQ032C</i> | Hypothetical protein                                 | 1.23 ± 0.06 |
| <i>CMJ152C</i> | 4-hydroxy-3-methylbut-2-enyl diphosphate reductase   | 1.23 ± 0.17 |
| <i>CMS303C</i> | Hypothetical protein                                 | 1.23 ± 0.06 |
| <i>CMQ432C</i> | NADH dehydrogenase type II                           | 1.23 ± 0.15 |
| <i>CMP183C</i> | Probable 2-epi-valiolone synthase                    | 1.23 ± 0.07 |
| <i>CMT613C</i> | DnaJ (Hsp40) homolog, subfamily A                    | 1.23 ± 0.18 |
| <i>CMB139C</i> | Similar to signal peptidase                          | 1.23 ± 0.03 |
| <i>CMT252C</i> | Phosphoserine aminotransferase                       | 1.23 ± 0.22 |
| <i>CME187C</i> | Hypothetical protein                                 | 1.23 ± 0.05 |
| <i>CMP052C</i> | DNA mismatch repair (recognition) protein            | 1.23 ± 0.20 |
| <i>CMG171C</i> | Thiamin biosynthesis protein                         | 1.23 ± 0.09 |
| <i>CMQ412C</i> | Similar to O-linked glcnac transferase, Mbb1 protein | 1.23 ± 0.11 |
| <i>CMK032C</i> | Hypothetical protein                                 | 1.23 ± 0.08 |
| <i>CMH156C</i> | Hypothetical protein                                 | 1.23 ± 0.15 |
| <i>CMB040C</i> | Small GTP-binding protein of Sar1/Arf family         | 1.23 ± 0.05 |
| <i>CMR011C</i> | Probable choline kinase                              | 1.23 ± 0.06 |
| <i>CML313C</i> | Similar to ATP-dependent RNA helicase                | 1.22 ± 0.14 |
| <i>CMP328C</i> | Poly-A RNA export protein DBP5                       | 1.22 ± 0.12 |
| <i>CMQ215C</i> | Chromodomain helicase DNA binding protein CHD        | 1.22 ± 0.31 |
| <i>CME163C</i> | Hypothetical protein                                 | 1.22 ± 0.20 |
| <i>CMP318C</i> | Sphingolipid delta 4 desaturase protein DES-1        | 1.22 ± 0.25 |
| <i>CMM082C</i> | Alpha glucosidase 2, alpha neutral subunit           | 1.22 ± 0.25 |
| <i>CML046C</i> | Hypothetical protein                                 | 1.22 ± 0.14 |
| <i>CMR287C</i> | 60S ribosomal protein L8                             | 1.22 ± 0.04 |
| <i>CMO303C</i> | Similar to mitochondrial carrier protein             | 1.22 ± 0.08 |
| <i>CMJ232C</i> | Hypothetical protein                                 | 1.22 ± 0.08 |

|                |                                                                           |      |   |      |
|----------------|---------------------------------------------------------------------------|------|---|------|
| <i>CML237C</i> | Similar to ABI3-interacting protein 3                                     | 1.22 | ± | 0.03 |
| <i>CMM269C</i> | Farnesyl-diphosphate synthetase                                           | 1.22 | ± | 0.16 |
| <i>CMT584C</i> | Dihydroorotase                                                            | 1.22 | ± | 0.18 |
| <i>CMO289C</i> | Hypothetical protein                                                      | 1.22 | ± | 0.06 |
| <i>CMJ077C</i> | Hypothetical protein                                                      | 1.22 | ± | 0.08 |
| <i>CMG089C</i> | Similar to respiratory burst oxidase protein                              | 1.22 | ± | 0.08 |
| <i>CMT598C</i> | Similar to heterogeneous nuclear ribonucleoprotein                        | 1.22 | ± | 0.20 |
| <i>CMN012C</i> | Mitochondrial ribosomal protein L35 precursor                             | 1.22 | ± | 0.14 |
| <i>CMQ260C</i> | Unknown kinase with aarf domain                                           | 1.22 | ± | 0.13 |
| <i>CMS013C</i> | Hypothetical protein                                                      | 1.22 | ± | 0.17 |
| <i>CMQ117C</i> | Eukaryotic translation initiation factor eIF-1A                           | 1.22 | ± | 0.24 |
| <i>CMT393C</i> | Hypothetical protein                                                      | 1.22 | ± | 0.14 |
| <i>CMD067C</i> | Probable prohibitin protein                                               | 1.22 | ± | 0.23 |
| <i>CMM286C</i> | 3-oxoacyl-[acyl-carrier-protein] synthase I, precursor                    | 1.22 | ± | 0.19 |
| <i>CMM223C</i> | Hypothetical protein                                                      | 1.22 | ± | 0.09 |
| <i>CMD187C</i> | Hypothetical protein                                                      | 1.22 | ± | 0.07 |
| <i>CME068C</i> | Hypothetical protein                                                      | 1.22 | ± | 0.04 |
| <i>CMO272C</i> | Phosphoacetylglucosamine mutase                                           | 1.22 | ± | 0.12 |
| <i>CMQ450C</i> | Hypothetical protein                                                      | 1.22 | ± | 0.10 |
| <i>CMQ442C</i> | Similar to glycosyl transferase                                           | 1.22 | ± | 0.06 |
| <i>CMQ003C</i> | Hypothetical protein                                                      | 1.21 | ± | 0.03 |
| <i>CMJ184C</i> | Hypothetical protein                                                      | 1.21 | ± | 0.08 |
| <i>CMC130C</i> | Hypothetical protein                                                      | 1.21 | ± | 0.16 |
| <i>CMP168C</i> | Hypothetical protein                                                      | 1.21 | ± | 0.17 |
| <i>CMM271C</i> | Ubiquitin-protein isopeptide ligase E3                                    | 1.21 | ± | 0.06 |
| <i>CMJ095C</i> | NADH dehydrogenase I (Complex I) iron-sulfur protein 20kDa subunit (PSST) | 1.21 | ± | 0.15 |
| <i>CMQ258C</i> | Similar to mitochondrial carrier protein                                  | 1.21 | ± | 0.15 |
| <i>CMP128C</i> | Casein kinase II, alpha subunit                                           | 1.21 | ± | 0.15 |
| <i>CMJ153C</i> | Hypothetical protein                                                      | 1.21 | ± | 0.16 |
| <i>CMT055C</i> | Hypothetical protein                                                      | 1.21 | ± | 0.11 |
| <i>CMR047C</i> | Hypothetical protein                                                      | 1.21 | ± | 0.05 |
| <i>CMD023C</i> | Similar to ferripyochelin binding protein                                 | 1.21 | ± | 0.13 |
| <i>CMC147C</i> | Polypeptide chain releasing factor eRF3                                   | 1.21 | ± | 0.07 |
| <i>CMS270C</i> | Chaperonin containing TCP1, subunit 4 (delta)                             | 1.21 | ± | 0.29 |
| <i>CMJ061C</i> | Hypothetical protein                                                      | 1.21 | ± | 0.04 |
| <i>CMS306C</i> | Hypothetical protein                                                      | 1.21 | ± | 0.03 |
| <i>CMB003C</i> | Similar to GTP-binding protein                                            | 1.21 | ± | 0.03 |
| <i>CMD125C</i> | Similar to heat shock protein DnaJ                                        | 1.21 | ± | 0.10 |
| <i>CME148C</i> | Chloroplast peptide chain release factor RF-2                             | 1.21 | ± | 0.46 |
| <i>CMS262C</i> | 60S ribosomal protein L23                                                 | 1.21 | ± | 0.02 |
| <i>CMG106C</i> | Probable flap structure-specific endonuclease 1                           | 1.21 | ± | 0.03 |
| <i>CMO080C</i> | NADH dehydrogenase I (Complex I) iron-sulfur protein 18kDa subunit        | 1.21 | ± | 0.14 |
| <i>CMN265C</i> | Hypothetical protein                                                      | 1.21 | ± | 0.10 |



|                |                                                                        |             |
|----------------|------------------------------------------------------------------------|-------------|
| <i>CMP288C</i> | Hypothetical protein                                                   | 1.21 ± 0.13 |
| <i>CMI166C</i> | Hypothetical protein                                                   | 1.21 ± 0.11 |
| <i>CMT172C</i> | Rubisco expression protein cfxQ (cbbX)                                 | 1.20 ± 0.03 |
| <i>CMR495C</i> | Hypothetical protein                                                   | 1.20 ± 0.06 |
| <i>CMT524C</i> | Hypothetical protein                                                   | 1.20 ± 0.06 |
| <i>CMN247C</i> | Coatomer protein complex, subunit zeta                                 | 1.20 ± 0.07 |
| <i>CMS132C</i> | Mitochondrial intermediate peptidase                                   | 1.20 ± 0.01 |
| <i>CMJ169C</i> | Probable heat shock protein hsIV, proteasome-related peptidase subunit | 1.20 ± 0.14 |
| <i>CMK172C</i> | Probable steroid dehydrogenase SPM2                                    | 1.20 ± 0.09 |
| <i>CMO318C</i> | Similar to glutathione S-transferase family protein                    | 1.20 ± 0.02 |
| <i>CMC045C</i> | 60S ribosomal protein L40, ubiquitin fusion protein                    | 1.20 ± 0.04 |
| <i>CMI187C</i> | Hypothetical protein                                                   | 1.20 ± 0.03 |
| <i>CMS273C</i> | Hypothetical protein                                                   | 1.20 ± 0.04 |
| <i>CMT369C</i> | Similar to O-demethylpuromycin-O-methyltransferase                     | 1.20 ± 0.17 |
| <i>CMQ201C</i> | Similar to myo-inositol monophosphatase                                | 1.20 ± 0.07 |
| <i>CME056C</i> | Hypothetical protein                                                   | 1.20 ± 0.18 |
| <i>CMN196C</i> | CDP-diacylglycerol--glycerol-3-phosphate 3-phosphatidyltransferase     | 1.20 ± 0.19 |
| <i>CMS080C</i> | 60S ribosomal protein L22                                              | 1.20 ± 0.26 |
| <i>CMP098C</i> | Similar to A/G-specific adenine glycosylase                            | 1.20 ± 0.06 |
| <i>CMK053C</i> | Hypothetical protein                                                   | 1.20 ± 0.07 |
| <i>CMQ334C</i> | Hypothetical protein                                                   | 1.20 ± 0.09 |
| <i>CMQ048C</i> | Hypothetical protein                                                   | 1.20 ± 0.02 |
| <i>CMR268C</i> | Similar to heat shock protein Hsp33                                    | 1.20 ± 0.07 |
| <i>CML230C</i> | Hypothetical protein                                                   | 1.20 ± 0.21 |
| <i>CMQ360C</i> | Hypothetical protein                                                   | 1.20 ± 0.06 |
| <i>CMT533C</i> | Probable tyrosine aminotransferase                                     | 1.20 ± 0.15 |
| <i>CMI160C</i> | Hypothetical protein                                                   | 1.20 ± 0.06 |
| <i>CMB153C</i> | Hypothetical protein                                                   | 1.20 ± 0.19 |
| <i>CMN287C</i> | Hypothetical protein                                                   | 1.20 ± 0.14 |
| <i>CMB023C</i> | Hypothetical protein                                                   | 1.20 ± 0.19 |
| <i>CMS353C</i> | Hypothetical protein                                                   | 1.20 ± 0.06 |
| <i>CMI138C</i> | Hypothetical protein                                                   | 1.20 ± 0.09 |
| <i>CMM285C</i> | Hypothetical protein                                                   | 1.20 ± 0.09 |
| <i>CMK063C</i> | Hypothetical protein, putative membrane transporter                    | 1.19 ± 0.18 |
| <i>CMR484C</i> | Similar to 13S condensin XCAP-D2 subunit                               | 1.19 ± 0.12 |
| <i>CMT049C</i> | Hypothetical protein                                                   | 1.19 ± 0.13 |
| <i>CMD103C</i> | Hypothetical protein                                                   | 1.19 ± 0.06 |
| <i>CMR114C</i> | Hypothetical protein                                                   | 1.19 ± 0.23 |
| <i>CML198C</i> | Ribosomal large subunit pseudouridine synthase C                       | 1.19 ± 0.11 |
| <i>CML135C</i> | Probable CCR4-NOT transcription complex, subunit 3                     | 1.19 ± 0.11 |
| <i>CMT271C</i> | Similar to nascent-polypeptide-associated complex alpha polypeptide    | 1.19 ± 0.18 |
| <i>CMS257C</i> | Hypothetical protein                                                   | 1.19 ± 0.13 |
| <i>CMQ292C</i> | Chloroplast ribosomal protein L15 precursor                            | 1.19 ± 0.16 |

|                |                                                                               |             |
|----------------|-------------------------------------------------------------------------------|-------------|
| <i>CMO255C</i> | Similar to nuclear polyadenylated RNA-binding protein NAB3                    | 1.19 ± 0.14 |
| <i>CMJ283C</i> | Receptor for activated protein kinase C                                       | 1.19 ± 0.10 |
| <i>CMS067C</i> | Hypothetical protein                                                          | 1.19 ± 0.11 |
| <i>CMK039C</i> | Photoregulatory zinc-finger protein COP1                                      | 1.19 ± 0.10 |
| <i>CMS406C</i> | Probable proline synthetase associated protein                                | 1.19 ± 0.16 |
| <i>CMK176C</i> | Photosystem II protein Psb27                                                  | 1.19 ± 0.20 |
| <i>CMC055C</i> | Probable lathosterol oxidase                                                  | 1.19 ± 0.16 |
| <i>CMO240C</i> | Hypothetical protein                                                          | 1.19 ± 0.06 |
| <i>CMS332C</i> | V-type ATPase V0 subunit c                                                    | 1.19 ± 0.07 |
| <i>CMX002C</i> | Hypothetical protein                                                          | 1.19 ± 0.08 |
| <i>CMJ174C</i> | Hypothetical protein                                                          | 1.19 ± 0.10 |
| <i>CMN064C</i> | Hypothetical protein                                                          | 1.19 ± 0.13 |
| <i>CMK056C</i> | Hypothetical protein                                                          | 1.19 ± 0.04 |
| <i>CMT038C</i> | Similar to retinoblastoma-family protein                                      | 1.19 ± 0.13 |
| <i>CMJ180C</i> | Hypothetical protein                                                          | 1.19 ± 0.11 |
| <i>CMJ106C</i> | Homogentisate 1,2-dioxygenase                                                 | 1.19 ± 0.17 |
| <i>CMJ066C</i> | Phenylalanine hydroxylase                                                     | 1.18 ± 0.07 |
| <i>CMP005C</i> | Hypothetical protein                                                          | 1.18 ± 0.05 |
| <i>CMS181C</i> | Rubredoxin                                                                    | 1.18 ± 0.04 |
| <i>CMR130C</i> | Similar to 1-acylglycerol-3-phosphate O-acyltransferase                       | 1.18 ± 0.09 |
| <i>CMJ244C</i> | Plastid terminal oxidase                                                      | 1.18 ± 0.15 |
| <i>CMR371C</i> | Similar to rRNA processing protein 7                                          | 1.18 ± 0.05 |
| <i>CMG147C</i> | Probable long-chain acyl-CoA synthetase                                       | 1.18 ± 0.19 |
| <i>CMN087C</i> | Hypothetical protein                                                          | 1.18 ± 0.04 |
| <i>CMP154C</i> | Similar to cytochrome B5                                                      | 1.18 ± 0.13 |
| <i>CMH264C</i> | DNA replication licensing factor MCM3                                         | 1.18 ± 0.19 |
| <i>CMJ125C</i> | Phosphatidylinositol 4-kinase                                                 | 1.18 ± 0.12 |
| <i>CMK049C</i> | Similar to biotin synthase                                                    | 1.18 ± 0.13 |
| <i>CMB012C</i> | Similar to coiled-coil protein; putative spindle pole body associated protein | 1.18 ± 0.03 |
| <i>CMP329C</i> | Putrescine aminopropyltransferase (spermidine synthase)                       | 1.18 ± 0.08 |
| <i>CMD116C</i> | Hypothetical protein                                                          | 1.18 ± 0.07 |
| <i>CMJ289C</i> | 60S ribosomal protein L32                                                     | 1.18 ± 0.13 |
| <i>CMH260C</i> | WD-repeat protein                                                             | 1.18 ± 0.03 |
| <i>CMG143C</i> | Similar to anti-silencing factor                                              | 1.18 ± 0.09 |
| <i>CMG097C</i> | Hypothetical protein                                                          | 1.18 ± 0.24 |
| <i>CMK055C</i> | Hypothetical protein                                                          | 1.18 ± 0.09 |
| <i>CMQ409C</i> | Hypothetical protein                                                          | 1.18 ± 0.11 |
| <i>CMS143C</i> | Hypothetical protein                                                          | 1.18 ± 0.07 |
| <i>CMJ235C</i> | Mitochondrial ribosomal protein L1 precursor                                  | 1.18 ± 0.04 |
| <i>CMN294C</i> | Hypothetical protein                                                          | 1.18 ± 0.07 |
| <i>CMJ250C</i> | Glyceraldehyde 3-phosphate dehydrogenase                                      | 1.18 ± 0.10 |
| <i>CMS229C</i> | Similar to quinone oxidoreductase                                             | 1.18 ± 0.11 |
| <i>CMO117C</i> | Hypothetical protein                                                          | 1.18 ± 0.05 |

|                |                                                                                                                                               |             |
|----------------|-----------------------------------------------------------------------------------------------------------------------------------------------|-------------|
| <i>CMP350C</i> | Hypothetical protein                                                                                                                          | 1.18 ± 0.07 |
| <i>CMR201C</i> | Probable mitochondrial ribosomal protein S21                                                                                                  | 1.18 ± 0.12 |
| <i>CMR457C</i> | Histone H2A.Z variant                                                                                                                         | 1.18 ± 0.13 |
| <i>CMK062C</i> | Hypothetical protein                                                                                                                          | 1.18 ± 0.03 |
| <i>CMO207C</i> | GIN4-like protein kinase                                                                                                                      | 1.18 ± 0.03 |
| <i>CMS356C</i> | Hypothetical protein                                                                                                                          | 1.18 ± 0.10 |
| <i>CMT313C</i> | Cysteine synthase A (O-acetylserine sulfhydrylase A) (O-acetylserine (thiol)-lyase A) (csase A) (sulfate starvation-induced protein 5) (SSI5) | 1.17 ± 0.11 |
| <i>CMN159C</i> | Unknown kinase with aarf domain                                                                                                               | 1.17 ± 0.05 |
| <i>CMR131C</i> | Hypothetical protein                                                                                                                          | 1.17 ± 0.07 |
| <i>CMJ186C</i> | 26S proteasome ATP-dependent regulatory subunit                                                                                               | 1.17 ± 0.04 |
| <i>CMD152C</i> | Probable ubiquitin-conjugating enzyme E2                                                                                                      | 1.17 ± 0.14 |
| <i>CMO177C</i> | Hypothetical protein                                                                                                                          | 1.17 ± 0.09 |
| <i>CMN290C</i> | Oxygen-evolving complex 23K protein                                                                                                           | 1.17 ± 0.19 |
| <i>CMT606C</i> | Hypothetical protein                                                                                                                          | 1.17 ± 0.07 |
| <i>CMT305C</i> | Argininosuccinate synthase                                                                                                                    | 1.17 ± 0.03 |
| <i>CMT616C</i> | Hypothetical protein                                                                                                                          | 1.17 ± 0.16 |
| <i>CMS357C</i> | Hypothetical protein                                                                                                                          | 1.17 ± 0.09 |
| <i>CMR028C</i> | Probable replication factor C large subunit                                                                                                   | 1.17 ± 0.02 |
| <i>CMT085C</i> | UDP-N-acetylglucosamine pyrophosphorylase (N-acetylglucosamine-1-phosphate uridylyltransferase)                                               | 1.17 ± 0.10 |
| <i>CMC083C</i> | Glutamate--tRNA ligase, cytoplasmic                                                                                                           | 1.17 ± 0.19 |
| <i>CMQ424C</i> | Nuclear poly(A) polymerase                                                                                                                    | 1.17 ± 0.12 |
| <i>CMR424C</i> | Hypothetical protein                                                                                                                          | 1.17 ± 0.04 |
| <i>CMM052C</i> | Transcription factor APFI                                                                                                                     | 1.17 ± 0.05 |
| <i>CMF018C</i> | Probable nicotinamide mononucleotide adenylyl transferase                                                                                     | 1.17 ± 0.08 |
| <i>CMS269C</i> | Hypothetical protein                                                                                                                          | 1.17 ± 0.07 |
| <i>CMM324C</i> | Hypothetical protein                                                                                                                          | 1.17 ± 0.04 |
| <i>CMA017C</i> | Similar to 1-acyl-sn-glycerol-3-phosphate acyltransferase                                                                                     | 1.17 ± 0.10 |
| <i>CMO025C</i> | Hypothetical protein                                                                                                                          | 1.17 ± 0.20 |
| <i>CME175C</i> | 60S ribosomal protein L37                                                                                                                     | 1.17 ± 0.02 |
| <i>CMQ434C</i> | Hypothetical protein                                                                                                                          | 1.17 ± 0.13 |
| <i>CMK175C</i> | Hypothetical protein                                                                                                                          | 1.17 ± 0.04 |
| <i>CMP214C</i> | Thiamine-phosphate pyrophosphorylase                                                                                                          | 1.17 ± 0.08 |
| <i>CMG015C</i> | Hypothetical protein                                                                                                                          | 1.17 ± 0.04 |
| <i>CMQ363C</i> | SWI/SNF related, matrix associated, actin dependent regulator of chromatin, subfamily a                                                       | 1.17 ± 0.10 |
| <i>CMS061C</i> | Probable peptide methionine sulfoxide reductase                                                                                               | 1.17 ± 0.12 |
| <i>CML250C</i> | Hypothetical protein                                                                                                                          | 1.17 ± 0.10 |
| <i>CMH038C</i> | Hypothetical protein                                                                                                                          | 1.17 ± 0.11 |
| <i>CMH263C</i> | Cyclophilin-type peptidyl-prolyl cis-trans isomerase                                                                                          | 1.17 ± 0.07 |
| <i>CMT540C</i> | Hypothetical protein                                                                                                                          | 1.17 ± 0.09 |
| <i>CMT515C</i> | Chromatin assembly factor 1 55 kDa subunit                                                                                                    | 1.17 ± 0.22 |
| <i>CMG070C</i> | Hypothetical protein                                                                                                                          | 1.17 ± 0.08 |
| <i>CMN062C</i> | Hypothetical protein                                                                                                                          | 1.17 ± 0.06 |
| <i>CMH246C</i> | Probable DNA repair protein SPR18                                                                                                             | 1.17 ± 0.23 |

|                |                                                               |             |
|----------------|---------------------------------------------------------------|-------------|
| <i>CME150C</i> | Hypothetical protein                                          | 1.16 ± 0.17 |
| <i>CMM175C</i> | Similar to divalent cation tolerance protein                  | 1.16 ± 0.13 |
| <i>CMT045C</i> | Probable ATP-dependent Clp protease regulatory subunit CLPX   | 1.16 ± 0.18 |
| <i>CMH150C</i> | Hypothetical protein                                          | 1.16 ± 0.06 |
| <i>CMS483C</i> | Similar to DNA mismatch repair protein                        | 1.16 ± 0.16 |
| <i>CMP256C</i> | Hypothetical protein                                          | 1.16 ± 0.06 |
| <i>CMH023C</i> | Hypothetical protein                                          | 1.16 ± 0.04 |
| <i>CMQ373C</i> | Hypothetical protein                                          | 1.16 ± 0.05 |
| <i>CMN269C</i> | Hypothetical protein                                          | 1.16 ± 0.04 |
| <i>CMM292C</i> | DegP protease                                                 | 1.16 ± 0.34 |
| <i>CM1209C</i> | TATA-box binding protein-associated factor 5                  | 1.16 ± 0.05 |
| <i>CMS115C</i> | Hypothetical protein                                          | 1.16 ± 0.11 |
| <i>CMJ245C</i> | Hypothetical protein                                          | 1.16 ± 0.03 |
| <i>CMS113C</i> | Unknown cyanobacterial protein                                | 1.16 ± 0.07 |
| <i>CMB050C</i> | Hypothetical protein                                          | 1.16 ± 0.09 |
| <i>CMS231C</i> | Similar to carotenoid biosynthesis protein, crtk gene product | 1.16 ± 0.08 |
| <i>CME044C</i> | Unknown WD repeat protein                                     | 1.16 ± 0.13 |
| <i>CMP006C</i> | 60S ribosomal protein L13                                     | 1.16 ± 0.16 |
| <i>CMF086C</i> | Probable myo-inositol dehydrogenase                           | 1.16 ± 0.07 |
| <i>CMS251C</i> | Hypothetical protein                                          | 1.16 ± 0.08 |
| <i>CMO063C</i> | Similar to yeast chromosome segregation protein MLO2          | 1.16 ± 0.06 |
| <i>CMQ192C</i> | Hypothetical protein                                          | 1.16 ± 0.04 |
| <i>CMT135C</i> | Hypothetical protein                                          | 1.16 ± 0.08 |
| <i>CMS133C</i> | Hypothetical protein                                          | 1.16 ± 0.12 |
| <i>CMK306C</i> | Hypothetical protein                                          | 1.16 ± 0.12 |
| <i>CM1293C</i> | Alpha,alpha-trehalose-phosphate synthase (UDP-forming)        | 1.16 ± 0.08 |
| <i>CMG065C</i> | Hypothetical protein                                          | 1.16 ± 0.07 |
| <i>CMN066C</i> | Hypothetical protein                                          | 1.15 ± 0.06 |
| <i>CMH198C</i> | Box H/ACA snoRNP component Nop10p                             | 1.15 ± 0.10 |
| <i>CMS455C</i> | Hypothetical protein                                          | 1.15 ± 0.11 |
| <i>CMT196C</i> | Small GTP-binding protein Sar1                                | 1.15 ± 0.14 |
| <i>CMM156C</i> | Hypothetical protein                                          | 1.15 ± 0.16 |
| <i>CMN185C</i> | Hypothetical protein                                          | 1.15 ± 0.10 |
| <i>CMO126C</i> | Dutp pyrophosphatase                                          | 1.15 ± 0.17 |
| <i>CMR054C</i> | Similar to phosphatidic acid phosphatase type 2B              | 1.15 ± 0.02 |
| <i>CM1094C</i> | Methionine--tRNA ligase, cytoplasmic                          | 1.15 ± 0.12 |
| <i>CMB088C</i> | Probable nucleotide binding protein Maf                       | 1.15 ± 0.04 |
| <i>CMF058C</i> | Probable zinc transporter                                     | 1.15 ± 0.10 |
| <i>CMT010C</i> | Retroelement, alive                                           | 1.15 ± 0.13 |
| <i>CM1181C</i> | Similar to magnesium transporter Mrs2p                        | 1.15 ± 0.08 |
| <i>CMK248C</i> | Similar to phosphate/phosphoenolpyruvate translocator protein | 1.15 ± 0.07 |
| <i>CMQ246C</i> | Hypothetical protein                                          | 1.15 ± 0.08 |
| <i>CMR162C</i> | Similar to mitochondrial carrier protein                      | 1.15 ± 0.07 |

|                |                                                                           |             |
|----------------|---------------------------------------------------------------------------|-------------|
| <i>CMG028C</i> | Hypothetical protein                                                      | 1.15 ± 0.24 |
| <i>CML307C</i> | Probable replication factor C protein                                     | 1.15 ± 0.08 |
| <i>CMJ109C</i> | 60S ribosomal protein L10                                                 | 1.15 ± 0.03 |
| <i>CMS278C</i> | Hypothetical protein                                                      | 1.15 ± 0.16 |
| <i>CMJ160C</i> | Hypothetical protein                                                      | 1.15 ± 0.08 |
| <i>CMK247C</i> | Similar to 11-beta-hydroxysteroid dehydrogenase                           | 1.15 ± 0.09 |
| <i>CMP152C</i> | Cytochrome c reductase (Complex III) cytochrome c1 subunit                | 1.15 ± 0.11 |
| <i>CMC104C</i> | Hypothetical protein                                                      | 1.15 ± 0.06 |
| <i>CMH227C</i> | Probable ubiquitin conjugating enzyme E2                                  | 1.15 ± 0.17 |
| <i>CMI194C</i> | Similar to rubredoxin                                                     | 1.15 ± 0.31 |
| <i>CMS058C</i> | Similar to origin recognition complex subunit 2                           | 1.15 ± 0.10 |
| <i>CMT330C</i> | Mitochondrial ribosomal protein S2, mitochondrial precursor               | 1.15 ± 0.11 |
| <i>CMT511C</i> | Hypothetical protein                                                      | 1.15 ± 0.04 |
| <i>CMO211C</i> | Hypothetical protein                                                      | 1.15 ± 0.07 |
| <i>CMQ470C</i> | Similar to thioredoxin peroxidase Dot5p                                   | 1.15 ± 0.23 |
| <i>CMK155C</i> | Hypothetical protein                                                      | 1.15 ± 0.06 |
| <i>CMJ157C</i> | Hypothetical protein                                                      | 1.15 ± 0.03 |
| <i>CMT043C</i> | GTP-binding protein of Nug1 family                                        | 1.15 ± 0.10 |
| <i>CMA069C</i> | SOUL family heme-binding protein                                          | 1.15 ± 0.11 |
| <i>CMR010C</i> | Probable ubiquitin conjugating enzyme E2                                  | 1.14 ± 0.06 |
| <i>CMS428C</i> | Eukaryotic translation elongation factor 2 (eEF-2)                        | 1.14 ± 0.22 |
| <i>CMQ144C</i> | Hypothetical protein                                                      | 1.14 ± 0.16 |
| <i>CML196C</i> | 60S ribosomal protein L11                                                 | 1.14 ± 0.06 |
| <i>CME057C</i> | Hypothetical protein                                                      | 1.14 ± 0.11 |
| <i>CMQ329C</i> | Hypothetical protein                                                      | 1.14 ± 0.10 |
| <i>CMS145C</i> | Similar to shuttle craft like transcriptional regulator NFX1              | 1.14 ± 0.11 |
| <i>CMJ151C</i> | Similar to thylakoid lumenal 17.4 kDa protein, chloroplast precursor      | 1.14 ± 0.12 |
| <i>CMO196C</i> | Probable microtubule organization 1 protein                               | 1.14 ± 0.12 |
| <i>CMD007C</i> | V-type ATPase V1 subunit D                                                | 1.14 ± 0.06 |
| <i>CMM126C</i> | Similar to elongation of very long chain fatty acids Elo3p (Sur4p)        | 1.14 ± 0.18 |
| <i>CMJ229C</i> | Riboflavin kinase                                                         | 1.14 ± 0.08 |
| <i>CMN224C</i> | Hypothetical protein                                                      | 1.14 ± 0.03 |
| <i>CMQ382C</i> | Similar to U3 snoRNP component Utp15p                                     | 1.14 ± 0.19 |
| <i>CMJ060C</i> | Hypothetical protein                                                      | 1.14 ± 0.05 |
| <i>CME079C</i> | Serine/threonine protein phosphatase PP1 catalytic subunit                | 1.14 ± 0.14 |
| <i>CMT358C</i> | Similar to N-terminal acetyltransferase complex ARD1 subunit              | 1.14 ± 0.20 |
| <i>CMS223C</i> | NADH dehydrogenase I (Complex I) iron-sulfur protein 23kDa subunit (TYKY) | 1.14 ± 0.02 |
| <i>CMJ197C</i> | Similar to smooth muscle caldesmon                                        | 1.14 ± 0.05 |
| <i>CMR413C</i> | Hypothetical protein                                                      | 1.14 ± 0.15 |
| <i>CMJ096C</i> | Similar to thioredoxin h                                                  | 1.14 ± 0.05 |
| <i>CMC127C</i> | Probable tRNA methyltransferase Trm7                                      | 1.14 ± 0.03 |
| <i>CMH069C</i> | Conserved GTP binding protein of unknown function                         | 1.14 ± 0.16 |
| <i>CMK047C</i> | Hypothetical protein                                                      | 1.14 ± 0.11 |

|                |                                                                                                      |             |
|----------------|------------------------------------------------------------------------------------------------------|-------------|
| <i>CML260C</i> | Similar to ATPase with chaperone activity                                                            | 1.14 ± 0.11 |
| <i>CML138C</i> | Similar to farnesyltransferase alpha subunit                                                         | 1.14 ± 0.11 |
| <i>CMS204C</i> | Hypothetical protein                                                                                 | 1.14 ± 0.06 |
| <i>CMQ427C</i> | Carnitine carrier; Crc1p                                                                             | 1.14 ± 0.21 |
| <i>CME052C</i> | Hypothetical protein                                                                                 | 1.14 ± 0.07 |
| <i>CMR161C</i> | WD-repeat protein                                                                                    | 1.14 ± 0.06 |
| <i>CMT574C</i> | Hypothetical protein                                                                                 | 1.14 ± 0.02 |
| <i>CMD094C</i> | Hypothetical protein                                                                                 | 1.14 ± 0.03 |
| <i>CMJ228C</i> | Similar to mitochondrial carrier protein                                                             | 1.14 ± 0.05 |
| <i>CMR050C</i> | Similar to chitobiosyldiphosphodolichol beta-mannosyltransferase                                     | 1.14 ± 0.07 |
| <i>CMS190C</i> | Similar to sugar fermentation stimulation protein, Sfs1                                              | 1.14 ± 0.03 |
| <i>CMN138C</i> | Probable AAA protein spastin                                                                         | 1.14 ± 0.12 |
| <i>CMO124C</i> | Glucose-6-phosphate isomerase                                                                        | 1.14 ± 0.11 |
| <i>CMH006C</i> | Unknown protein involving with Iron-Sulfur proteins SufD                                             | 1.14 ± 0.27 |
| <i>CMQ149C</i> | RNA helicase                                                                                         | 1.14 ± 0.09 |
| <i>CMT262C</i> | U6 snRNA-associated Sm-like protein LSm3                                                             | 1.14 ± 0.08 |
| <i>CMJ195C</i> | Similar to outward rectifying potassium channel KCO                                                  | 1.13 ± 0.10 |
| <i>CMJ062C</i> | Similar to acetyltransferase, GNAT family                                                            | 1.13 ± 0.13 |
| <i>CMS328C</i> | Unknown protein of cyanobacteria                                                                     | 1.13 ± 0.04 |
| <i>CMM142C</i> | Hypothetical protein                                                                                 | 1.13 ± 0.13 |
| <i>CMT565C</i> | DNA recombination protein DMC1                                                                       | 1.13 ± 0.06 |
| <i>CMO077C</i> | Hypothetical protein                                                                                 | 1.13 ± 0.15 |
| <i>CMK076C</i> | Hypothetical protein                                                                                 | 1.13 ± 0.08 |
| <i>CMS165C</i> | Hypothetical protein                                                                                 | 1.13 ± 0.06 |
| <i>CMM300C</i> | Hypothetical protein                                                                                 | 1.13 ± 0.08 |
| <i>CMT046C</i> | Similar to a negative regulator of cell cycle, cullin 1                                              | 1.13 ± 0.08 |
| <i>CMC039C</i> | Probable 1-cys peroxiredoxin                                                                         | 1.13 ± 0.06 |
| <i>CMR421C</i> | Probable 4-nitrophenyl phosphatase                                                                   | 1.13 ± 0.10 |
| <i>CMB114C</i> | Hypothetical protein                                                                                 | 1.13 ± 0.17 |
| <i>CMG203C</i> | Similar to protein phosphatase 2C                                                                    | 1.13 ± 0.21 |
| <i>CMG162C</i> | Similar to ferredoxin component (biphenyl dioxygenase, Rieske iron-sulfur component related protein) | 1.13 ± 0.09 |
| <i>CMP244C</i> | Hypothetical protein                                                                                 | 1.13 ± 0.03 |
| <i>CMI245C</i> | Hypothetical protein                                                                                 | 1.13 ± 0.10 |
| <i>CMQ445C</i> | 60S acidic ribosomal protein P0                                                                      | 1.13 ± 0.10 |
| <i>CMK089C</i> | Hypothetical protein                                                                                 | 1.13 ± 0.12 |
| <i>CML184C</i> | Hypothetical protein                                                                                 | 1.13 ± 0.04 |
| <i>CMH173C</i> | Similar to mitochondrial uncoupling protein                                                          | 1.13 ± 0.03 |
| <i>CMR055C</i> | Similar to cationic amino acid transporter                                                           | 1.13 ± 0.04 |
| <i>CMT014C</i> | Hypothetical protein                                                                                 | 1.13 ± 0.06 |
| <i>CMJ221C</i> | Hypothetical protein                                                                                 | 1.13 ± 0.06 |
| <i>CMP201C</i> | Similar to transcriptional regulator                                                                 | 1.13 ± 0.02 |
| <i>CMM211C</i> | Hypothetical protein                                                                                 | 1.13 ± 0.07 |
| <i>CMS446C</i> | Thimet oligopeptidase                                                                                | 1.13 ± 0.07 |

|                |                                                               |             |
|----------------|---------------------------------------------------------------|-------------|
| <i>CMK292C</i> | Hypothetical protein                                          | 1.13 ± 0.09 |
| <i>CMP303C</i> | Similar to cell division control protein cdc45                | 1.13 ± 0.08 |
| <i>CML042C</i> | Ubiquitin-like protein Rub1                                   | 1.13 ± 0.06 |
| <i>CMS407C</i> | Hypothetical protein                                          | 1.13 ± 0.09 |
| <i>CMR193C</i> | Similar to ribosomal protein S6 kinase                        | 1.13 ± 0.03 |
| <i>CMQ010C</i> | Probable V-type ATPase V1 subunit E                           | 1.13 ± 0.11 |
| <i>CMQ240C</i> | Similar to DnaJ (Hsp40) homolog                               | 1.13 ± 0.13 |
| <i>CMN160C</i> | Hypothetical protein                                          | 1.13 ± 0.13 |
| <i>CMS411C</i> | Hypothetical protein                                          | 1.13 ± 0.05 |
| <i>CMT388C</i> | Unknown phosphatase CbbY                                      | 1.13 ± 0.06 |
| <i>CMO098C</i> | Threonine--tRNA ligase, chloroplast or mitochondrial          | 1.13 ± 0.15 |
| <i>CMM240C</i> | 40S ribosomal protein S25                                     | 1.13 ± 0.15 |
| <i>CML193C</i> | Hypothetical protein                                          | 1.13 ± 0.17 |
| <i>CMM259C</i> | Hypothetical protein                                          | 1.13 ± 0.05 |
| <i>CME094C</i> | Hypothetical protein                                          | 1.13 ± 0.03 |
| <i>CMS022C</i> | Hypothetical protein                                          | 1.13 ± 0.12 |
| <i>CMH008C</i> | Branched-chain alpha-keto acid dehydrogenase E1-alpha subunit | 1.13 ± 0.07 |
| <i>CMQ197C</i> | Similar to mitochondrial division protein Fis1p               | 1.12 ± 0.02 |
| <i>CMD100C</i> | Similar to ATP-dependent proteinase BsgA                      | 1.12 ± 0.09 |
| <i>CMP229C</i> | Probable alpha-soluble NSF attachment protein                 | 1.12 ± 0.03 |
| <i>CMR339C</i> | Threonine synthase                                            | 1.12 ± 0.26 |
| <i>CMG184C</i> | Similar to U3 snoRNP component Utp6p                          | 1.12 ± 0.11 |
| <i>CMH209C</i> | Heme oxygenase                                                | 1.12 ± 0.05 |
| <i>CMC057C</i> | Hypothetical protein                                          | 1.12 ± 0.14 |
| <i>CMC078C</i> | Hypothetical protein                                          | 1.12 ± 0.07 |
| <i>CMM281C</i> | Hypothetical protein                                          | 1.12 ± 0.06 |
| <i>CMT109C</i> | Similar to cyclin M2                                          | 1.12 ± 0.08 |
| <i>CMI042C</i> | Tyrosine--tRNA ligase                                         | 1.12 ± 0.11 |
| <i>CMS502C</i> | Mitochondrial translation elongation factor Tu (EF-Tu)        | 1.12 ± 0.16 |
| <i>CMB122C</i> | Hypothetical protein                                          | 1.12 ± 0.10 |
| <i>CMB105C</i> | Hypothetical protein                                          | 1.12 ± 0.01 |
| <i>CML285C</i> | Hypothetical protein                                          | 1.12 ± 0.04 |
| <i>CMI145C</i> | Hypothetical protein                                          | 1.12 ± 0.04 |
| <i>CMJ205C</i> | Probable iron-sulfur cluster scaffold protein                 | 1.12 ± 0.07 |
| <i>CML186C</i> | Hypothetical protein                                          | 1.12 ± 0.10 |
| <i>CMT268C</i> | Hypothetical protein                                          | 1.12 ± 0.13 |
| <i>CMR150C</i> | 60S ribosomal protein L21                                     | 1.12 ± 0.12 |
| <i>CMO201C</i> | Hypothetical protein                                          | 1.12 ± 0.03 |
| <i>CMT272C</i> | Eukaryotic translation initiation factor eIF-2B beta subunit  | 1.12 ± 0.05 |
| <i>CMB052C</i> | DNA polymerase delta small subunit                            | 1.12 ± 0.09 |
| <i>CMN226C</i> | Similar to N6-adenine-specific methylase                      | 1.12 ± 0.04 |
| <i>CMR269C</i> | Eukaryotic translation initiation factor eIF-2B alpha subunit | 1.12 ± 0.10 |
| <i>CMG114C</i> | Hypothetical protein                                          | 1.12 ± 0.05 |

|                |                                                                  |             |
|----------------|------------------------------------------------------------------|-------------|
| <i>CMO099C</i> | Similar to apoptosis-inducing factor AIF                         | 1.12 ± 0.08 |
| <i>CMT084C</i> | Hypothetical protein                                             | 1.12 ± 0.13 |
| <i>CMC027C</i> | Dihydroorotate oxidase                                           | 1.12 ± 0.17 |
| <i>CMN054C</i> | Similar to cell cycle checkpoint and DNA repair exonuclease RAD1 | 1.12 ± 0.06 |
| <i>CMR478C</i> | Similar to transcription factor IIA small subunit                | 1.12 ± 0.08 |
| <i>CMH220C</i> | Retromer component VPS35                                         | 1.12 ± 0.06 |
| <i>CMT466C</i> | Similar to transmembrane calcium/manganese transporter Ccc1p     | 1.12 ± 0.01 |
| <i>CMF168C</i> | Similar to autoantigen                                           | 1.12 ± 0.06 |
| <i>CMH273C</i> | Similar to nuclear import protein NPL4                           | 1.12 ± 0.03 |
| <i>CMR270C</i> | Similar to actin-related protein Arp4                            | 1.12 ± 0.04 |
| <i>CMS135C</i> | Hypothetical protein                                             | 1.12 ± 0.02 |
| <i>CMO096C</i> | Hypothetical protein                                             | 1.12 ± 0.25 |
| <i>CMP355C</i> | Similar to J-type co-chaperone HSC20                             | 1.11 ± 0.12 |
| <i>CMR112C</i> | Hypothetical protein                                             | 1.11 ± 0.05 |
| <i>CMQ358C</i> | Similar to candidate tumor suppressor                            | 1.11 ± 0.02 |
| <i>CMT118C</i> | Similar to bacterial peptide chain release factor                | 1.11 ± 0.03 |
| <i>CMQ318C</i> | Hypothetical protein                                             | 1.11 ± 0.05 |
| <i>CMC085C</i> | Hypothetical protein                                             | 1.11 ± 0.02 |
| <i>CMI202C</i> | 40S ribosomal protein S15A                                       | 1.11 ± 0.05 |
| <i>CMJ281C</i> | Hypothetical protein                                             | 1.11 ± 0.07 |
| <i>CMK128C</i> | Hypothetical protein                                             | 1.11 ± 0.12 |
| <i>CMT634C</i> | Similar to rRNA methylase SpoU                                   | 1.11 ± 0.03 |
| <i>CMI108C</i> | Hypothetical protein                                             | 1.11 ± 0.01 |
| <i>CME074C</i> | Hypothetical protein                                             | 1.11 ± 0.05 |
| <i>CMR452C</i> | Hypothetical protein                                             | 1.11 ± 0.02 |
| <i>CMH231C</i> | Hypothetical protein                                             | 1.11 ± 0.09 |
| <i>CMP004C</i> | Hypothetical protein                                             | 1.11 ± 0.07 |
| <i>CMC151C</i> | Probable V-type ATPase V1 subunit C                              | 1.11 ± 0.06 |
| <i>CMG007C</i> | Phosphatidylinositol transfer protein                            | 1.11 ± 0.10 |
| <i>CMN201C</i> | GTP-binding protein of Era family                                | 1.11 ± 0.06 |
| <i>CMP180C</i> | Hypothetical protein                                             | 1.11 ± 0.14 |
| <i>CMS008C</i> | Similar to 1-acyl-sn-glycerol-3-phosphate acyltransferase        | 1.11 ± 0.03 |
| <i>CMC013C</i> | Probable 26S proteasome, non-ATPase regulatory subunit           | 1.11 ± 0.07 |
| <i>CMR136C</i> | Hypothetical protein                                             | 1.11 ± 0.03 |
| <i>CMK232C</i> | Argininosuccinate lyase                                          | 1.11 ± 0.10 |
| <i>CMI215C</i> | Probable GDP dissociation inhibitor                              | 1.11 ± 0.09 |
| <i>CMO288C</i> | Hypothetical protein                                             | 1.11 ± 0.10 |
| <i>CMK072C</i> | Hypothetical protein                                             | 1.11 ± 0.22 |
| <i>CMP209C</i> | Hypothetical protein                                             | 1.11 ± 0.03 |
| <i>CMR375C</i> | Hypothetical protein                                             | 1.11 ± 0.04 |
| <i>CMG030C</i> | Similar to beta-tubulin folding cofactor E                       | 1.11 ± 0.07 |
| <i>CMO308C</i> | Probable homocysteine S-methyltransferase                        | 1.11 ± 0.05 |
| <i>CMT121C</i> | Similar to sphingosine kinase                                    | 1.11 ± 0.08 |



|                |                                                              |             |
|----------------|--------------------------------------------------------------|-------------|
| <i>CMS364C</i> | Hypothetical protein                                         | 1.11 ± 0.02 |
| <i>CMK273C</i> | 60S ribosomal protein L23A                                   | 1.11 ± 0.18 |
| <i>CMM192C</i> | Hypothetical protein                                         | 1.11 ± 0.17 |
| <i>CMP041C</i> | Hypothetical protein                                         | 1.11 ± 0.06 |
| <i>CMC162C</i> | Hypothetical protein                                         | 1.11 ± 0.17 |
| <i>CMQ320C</i> | Hypothetical protein                                         | 1.11 ± 0.13 |
| <i>CMO344C</i> | Similar to acetohydroxy acid synthase, large subunit         | 1.11 ± 0.18 |
| <i>CMF043C</i> | Probable glutathione synthetase                              | 1.11 ± 0.03 |
| <i>CMG093C</i> | Proteasome regulatory particle subunit                       | 1.10 ± 0.12 |
| <i>CML320C</i> | Similar to stromal cell derived factor 2 SDF2                | 1.10 ± 0.14 |
| <i>CMS444C</i> | 4-(cytidine 5'-diphospho)-2-C-methyl-D-erythritol kinase     | 1.10 ± 0.02 |
| <i>CMO309C</i> | Hypothetical protein                                         | 1.10 ± 0.18 |
| <i>CMH071C</i> | 60S ribosomal protein L5                                     | 1.10 ± 0.17 |
| <i>CMT453C</i> | Similar to nucleolar RNA-associated protein NRAP             | 1.10 ± 0.06 |
| <i>CMA035C</i> | Probable mRNA guanylyltransferase                            | 1.10 ± 0.10 |
| <i>CMM114C</i> | Calcium-transporting ATPase                                  | 1.10 ± 0.13 |
| <i>CMR231C</i> | Hypothetical protein                                         | 1.10 ± 0.05 |
| <i>CMS253C</i> | Similar to cytidine/deoxycytidylate deaminase family protein | 1.10 ± 0.14 |
| <i>CMK305C</i> | Similar to DnaJ (Hsp40) homolog, subfamily B                 | 1.10 ± 0.09 |
| <i>CML289C</i> | Hypothetical protein                                         | 1.10 ± 0.11 |
| <i>CML148C</i> | Hypothetical protein                                         | 1.10 ± 0.08 |
| <i>CMH027C</i> | Similar to transcriptional activator FHA1                    | 1.10 ± 0.12 |
| <i>CMS122C</i> | Probable farnesyl-protein transferase beta-subunit           | 1.10 ± 0.08 |
| <i>CMT059C</i> | Hypothetical protein                                         | 1.10 ± 0.04 |
| <i>CMT092C</i> | Hypothetical protein                                         | 1.10 ± 0.06 |
| <i>CMP018C</i> | Probable coclaurine N-methyltransferase                      | 1.10 ± 0.04 |
| <i>CMK207C</i> | Hypothetical protein                                         | 1.10 ± 0.09 |
| <i>CMH202C</i> | Probable isoprenylcysteine methyltransferase                 | 1.10 ± 0.24 |
| <i>CMS319C</i> | Cytochrome P450 involved in sterol biosynthesis              | 1.10 ± 0.08 |
| <i>CMT537C</i> | Hypothetical protein                                         | 1.10 ± 0.20 |
| <i>CMT611C</i> | Malate dehydrogenase, cytoplasmic                            | 1.10 ± 0.05 |
| <i>CMO296C</i> | Hypothetical protein                                         | 1.10 ± 0.04 |
| <i>CMR280C</i> | Hypothetical protein                                         | 1.10 ± 0.07 |
| <i>CMT356C</i> | Dynein light chain                                           | 1.10 ± 0.04 |
| <i>CMD141C</i> | Hypothetical protein                                         | 1.10 ± 0.05 |
| <i>CML029C</i> | Mitochondrial F-type ATPase F1 subunit gamma, precursor      | 1.10 ± 0.14 |
| <i>CMK067C</i> | Aquaporin 5                                                  | 1.10 ± 0.04 |
| <i>CML160C</i> | Hypothetical protein                                         | 1.10 ± 0.02 |
| <i>CMA138C</i> | Cell cycle switch protein                                    | 1.10 ± 0.04 |
| <i>CMP157C</i> | Similar to triacylglycerol lipase                            | 1.10 ± 0.06 |
| <i>CMM023C</i> | Hypothetical protein                                         | 1.10 ± 0.09 |
| <i>CMT477C</i> | 20S core proteasome subunit beta 6                           | 1.10 ± 0.03 |
| <i>CMM016C</i> | Hypothetical protein                                         | 1.10 ± 0.05 |

|                |                                                                                                                                                                         |             |
|----------------|-------------------------------------------------------------------------------------------------------------------------------------------------------------------------|-------------|
| <i>CMA122C</i> | 40S ribosomal protein S7                                                                                                                                                | 1.10 ± 0.02 |
| <i>CMF103C</i> | Clathrin heavy chain                                                                                                                                                    | 1.10 ± 0.19 |
| <i>CMM236C</i> | Hypothetical protein                                                                                                                                                    | 1.10 ± 0.08 |
| <i>CMO110C</i> | Hypothetical protein                                                                                                                                                    | 1.10 ± 0.05 |
| <i>CMN078C</i> | Hypothetical protein                                                                                                                                                    | 1.10 ± 0.06 |
| <i>CMR349C</i> | Actin interacting protein                                                                                                                                               | 1.10 ± 0.14 |
| <i>CMN245C</i> | Similar to mutator MutT protein                                                                                                                                         | 1.10 ± 0.05 |
| <i>CMR178C</i> | Cytochrome c reductase (Complex III) ubiquinone-binding protein                                                                                                         | 1.10 ± 0.09 |
| <i>CMG178C</i> | Squalene synthase                                                                                                                                                       | 1.10 ± 0.06 |
| <i>CMO311C</i> | Similar to mitochondrial presequence translocase subunit Tim23                                                                                                          | 1.10 ± 0.08 |
| <i>CMO020C</i> | Hypothetical protein                                                                                                                                                    | 1.09 ± 0.08 |
| <i>CMR335C</i> | Hypothetical protein                                                                                                                                                    | 1.09 ± 0.14 |
| <i>CMR291C</i> | ATP-binding cassette, sub-family G (WBC), member 2                                                                                                                      | 1.09 ± 0.02 |
| <i>CMR405C</i> | Similar to retromer component VPS29                                                                                                                                     | 1.09 ± 0.02 |
| <i>CMI159C</i> | Hypothetical protein                                                                                                                                                    | 1.09 ± 0.05 |
| <i>CMX010C</i> | Hypothetical protein                                                                                                                                                    | 1.09 ± 0.08 |
| <i>CMN248C</i> | Hypothetical protein                                                                                                                                                    | 1.09 ± 0.03 |
| <i>CMF136C</i> | Similar to UDP-N-acetylglucosamine pyrophosphorylase                                                                                                                    | 1.09 ± 0.06 |
| <i>CMJ086C</i> | Probable gamma hydroxybutyrate dehydrogenase                                                                                                                            | 1.09 ± 0.07 |
| <i>CMM169C</i> | Hypothetical protein                                                                                                                                                    | 1.09 ± 0.04 |
| <i>CMD161C</i> | Hypothetical protein                                                                                                                                                    | 1.09 ± 0.05 |
| <i>CMN284C</i> | Probable cinnamyl-alcohol dehydrogenase                                                                                                                                 | 1.09 ± 0.10 |
| <i>CME060C</i> | Similar to ER-derived vesicles protein Erv14                                                                                                                            | 1.09 ± 0.06 |
| <i>CMR039C</i> | Similar to cell surface protein that may regulate cell wall beta-glucan synthesis and bud site selection; <i>Hanenula mrakii</i> killer toxin-resistance protein; Hkr1p | 1.09 ± 0.07 |
| <i>CMN134C</i> | Hypothetical protein                                                                                                                                                    | 1.09 ± 0.03 |
| <i>CMP069C</i> | MYB-related protein                                                                                                                                                     | 1.09 ± 0.08 |
| <i>CMB143C</i> | Probable molybdenum cofactor biosynthesis protein Cnx1                                                                                                                  | 1.09 ± 0.15 |
| <i>CMM328C</i> | Similar to acid phosphatase 2, lysosomal                                                                                                                                | 1.09 ± 0.08 |
| <i>CMM090C</i> | Hypothetical protein                                                                                                                                                    | 1.09 ± 0.06 |
| <i>CMH183C</i> | Small GTP-binding protein of Rho family                                                                                                                                 | 1.09 ± 0.10 |
| <i>CMO242C</i> | Translational inhibitor protein p14.5                                                                                                                                   | 1.09 ± 0.08 |
| <i>CMD028C</i> | Hypothetical protein                                                                                                                                                    | 1.09 ± 0.13 |
| <i>CMT550C</i> | Unknown homeobox protein                                                                                                                                                | 1.09 ± 0.03 |
| <i>CMH189C</i> | Hypothetical protein                                                                                                                                                    | 1.09 ± 0.14 |
| <i>CMQ204C</i> | Ste20/SPS1-like serine/threonine kinase                                                                                                                                 | 1.09 ± 0.08 |
| <i>CMB016C</i> | Hypothetical protein                                                                                                                                                    | 1.09 ± 0.04 |
| <i>CMP191C</i> | Similar to high light inducible protein                                                                                                                                 | 1.09 ± 0.04 |
| <i>CMA087C</i> | Hypothetical protein                                                                                                                                                    | 1.09 ± 0.02 |
| <i>CMS047C</i> | Mitochondrial ribosomal protein L21 precursor                                                                                                                           | 1.09 ± 0.07 |
| <i>CMK038C</i> | Hypothetical protein                                                                                                                                                    | 1.09 ± 0.06 |
| <i>CMR366C</i> | Hypothetical protein                                                                                                                                                    | 1.09 ± 0.05 |
| <i>CMN192C</i> | MutS family DNA mismatch repair protein MSH5                                                                                                                            | 1.09 ± 0.03 |
| <i>CME076C</i> | Hypothetical protein                                                                                                                                                    | 1.09 ± 0.01 |

|                |                                                                                                     |             |
|----------------|-----------------------------------------------------------------------------------------------------|-------------|
| <i>CML188C</i> | Hypothetical protein                                                                                | 1.09 ± 0.09 |
| <i>CMD131C</i> | Hypothetical protein                                                                                | 1.09 ± 0.07 |
| <i>CMM228C</i> | Unknown hydrolase                                                                                   | 1.09 ± 0.02 |
| <i>CMP115C</i> | Similar to Ap-4-A phosphorylase II                                                                  | 1.09 ± 0.02 |
| <i>CMN324C</i> | Conserved GTP-binding protein of unknown function (Developmentally regulated GTP-binding protein 1) | 1.09 ± 0.05 |
| <i>CMB069C</i> | Hypothetical protein                                                                                | 1.09 ± 0.04 |
| <i>CMP167C</i> | Hypothetical protein                                                                                | 1.09 ± 0.18 |
| <i>CMP074C</i> | Hypothetical protein                                                                                | 1.09 ± 0.05 |
| <i>CML336C</i> | Similar to RNA helicase (RH16)                                                                      | 1.09 ± 0.05 |
| <i>CMJ019C</i> | Hypothetical protein                                                                                | 1.09 ± 0.15 |
| <i>CMT275C</i> | Valine--tRNA ligase                                                                                 | 1.09 ± 0.12 |
| <i>CMT317C</i> | Hypothetical protein                                                                                | 1.08 ± 0.23 |
| <i>CMR053C</i> | DNA repair protein RAD51                                                                            | 1.08 ± 0.04 |
| <i>CMD090C</i> | Hypothetical protein                                                                                | 1.08 ± 0.07 |
| <i>CMT476C</i> | Probable phosphate transporter Pht2                                                                 | 1.08 ± 0.09 |
| <i>CMQ101C</i> | Gamma-glutamyltransferase                                                                           | 1.08 ± 0.07 |
| <i>CMI199C</i> | Similar to ribosomal protein S1                                                                     | 1.08 ± 0.11 |
| <i>CMJ165C</i> | Hypothetical protein                                                                                | 1.08 ± 0.01 |
| <i>CMJ168C</i> | Hypothetical protein                                                                                | 1.08 ± 0.05 |
| <i>CMG095C</i> | Similar to 6-pyruvoyl tetrahydrobiopterin synthase                                                  | 1.08 ± 0.09 |
| <i>CMF063C</i> | Hypothetical protein                                                                                | 1.08 ± 0.06 |
| <i>CMK240C</i> | Hypothetical protein                                                                                | 1.08 ± 0.07 |
| <i>CMN171C</i> | Hypothetical protein                                                                                | 1.08 ± 0.03 |
| <i>CMQ438C</i> | Hypothetical protein                                                                                | 1.08 ± 0.06 |
| <i>CMQ058C</i> | Hypothetical protein                                                                                | 1.08 ± 0.04 |
| <i>CMK054C</i> | Nucleotide excision repair protein yeast rad23/human HHR23A homolog                                 | 1.08 ± 0.09 |
| <i>CMN057C</i> | Hypothetical protein                                                                                | 1.08 ± 0.03 |
| <i>CMR491C</i> | Hypothetical protein                                                                                | 1.08 ± 0.03 |
| <i>CMF125C</i> | Probable RNA helicase RH2                                                                           | 1.08 ± 0.06 |
| <i>CMT174C</i> | Similar to kynurenine 3-hydroxylase                                                                 | 1.08 ± 0.05 |
| <i>CMQ174C</i> | Hypothetical protein                                                                                | 1.08 ± 0.22 |
| <i>CMN043C</i> | Hypothetical protein                                                                                | 1.08 ± 0.09 |
| <i>CMH119C</i> | 20S core proteasome subunit beta 4                                                                  | 1.08 ± 0.13 |
| <i>CMP239C</i> | 14-3-3 protein                                                                                      | 1.08 ± 0.10 |
| <i>CMA133C</i> | Similar to syntaxin 6                                                                               | 1.08 ± 0.07 |
| <i>CMR176C</i> | Unknown homeobox protein                                                                            | 1.08 ± 0.05 |
| <i>CMD137C</i> | Hypothetical protein                                                                                | 1.08 ± 0.03 |
| <i>CMS370C</i> | Similar to rRNA methylase                                                                           | 1.08 ± 0.07 |
| <i>CMR468C</i> | Hypothetical protein                                                                                | 1.08 ± 0.05 |
| <i>CMR190C</i> | Probable ER lumen protein retaining receptor                                                        | 1.08 ± 0.06 |
| <i>CMP352C</i> | 4-alpha-glucanotransferase                                                                          | 1.08 ± 0.10 |
| <i>CML226C</i> | Hypothetical protein                                                                                | 1.08 ± 0.11 |
| <i>CMX011C</i> | Chloroplast ribosomal protein L10                                                                   | 1.08 ± 0.07 |

|                |                                                                              |             |
|----------------|------------------------------------------------------------------------------|-------------|
| <i>CMK178C</i> | Mitochondrial F-type ATPase F0 subunit d                                     | 1.08 ± 0.02 |
| <i>CMO007C</i> | Hypothetical protein                                                         | 1.08 ± 0.08 |
| <i>CMH187C</i> | Similar to shaggy-related protein kinase                                     | 1.08 ± 0.14 |
| <i>CML294C</i> | Hypothetical protein                                                         | 1.08 ± 0.02 |
| <i>CMQ167C</i> | Sulfate binding protein of chloroplast sulfate ABC transporter (SbpA)        | 1.08 ± 0.21 |
| <i>CMN211C</i> | Hypothetical protein                                                         | 1.08 ± 0.02 |
| <i>CMI022C</i> | Hypothetical protein                                                         | 1.08 ± 0.06 |
| <i>CMP251C</i> | Similar to Ras-related GTP-binding protein ragA                              | 1.08 ± 0.03 |
| <i>CMO001C</i> | Hypothetical protein                                                         | 1.08 ± 0.08 |
| <i>CMP234C</i> | Imidazoleglycerol-phosphate dehydratase (IGPD)                               | 1.08 ± 0.02 |
| <i>CMM294C</i> | Probable ferredoxin--NADP reductase                                          | 1.08 ± 0.04 |
| <i>CMD036C</i> | Similar to Membrane transporters of cations and cationic drugs               | 1.08 ± 0.07 |
| <i>CMR251C</i> | Hypothetical protein                                                         | 1.08 ± 0.16 |
| <i>CMR282C</i> | Glycine dehydrogenase (decarboxylating), mitochondrial precursor             | 1.08 ± 0.07 |
| <i>CMK101C</i> | Hypothetical protein                                                         | 1.08 ± 0.14 |
| <i>CMT367C</i> | Ankyrin-repeat protein                                                       | 1.08 ± 0.08 |
| <i>CMQ151C</i> | Hypothetical protein                                                         | 1.08 ± 0.05 |
| <i>CML131C</i> | ATPases of the AAA+ class                                                    | 1.08 ± 0.05 |
| <i>CMI114C</i> | AMP deaminase                                                                | 1.08 ± 0.16 |
| <i>CMD071C</i> | Unknown ribonuclease                                                         | 1.08 ± 0.12 |
| <i>CMS005C</i> | Similar to human p47 protein                                                 | 1.08 ± 0.08 |
| <i>CMF121C</i> | Alpha-xylosidase                                                             | 1.08 ± 0.12 |
| <i>CMI119C</i> | Similar to DNA repair protein rad16                                          | 1.08 ± 0.03 |
| <i>CMH042C</i> | Hypothetical protein                                                         | 1.08 ± 0.04 |
| <i>CMO013C</i> | Probable nicotinate-nucleotide pyrophosphorylase (carboxylating)             | 1.08 ± 0.05 |
| <i>CMP247C</i> | Methionyl aminopeptidase                                                     | 1.08 ± 0.04 |
| <i>CML050C</i> | Ribonucleoside-diphosphate reductase beta chain                              | 1.07 ± 0.03 |
| <i>CMR065C</i> | Hypothetical protein                                                         | 1.07 ± 0.05 |
| <i>CMG088C</i> | Hypothetical protein                                                         | 1.07 ± 0.04 |
| <i>CMS123C</i> | Hypothetical protein                                                         | 1.07 ± 0.11 |
| <i>CMN162C</i> | Similar to oxidoreductase                                                    | 1.07 ± 0.16 |
| <i>CMT134C</i> | MYB-related protein                                                          | 1.07 ± 0.07 |
| <i>CMS213C</i> | Hypothetical protein                                                         | 1.07 ± 0.07 |
| <i>CMO145C</i> | Probable replication factor C subunit 3                                      | 1.07 ± 0.03 |
| <i>CMO085C</i> | Hypothetical protein                                                         | 1.07 ± 0.09 |
| <i>CMM321C</i> | RNA polymerase III subunit                                                   | 1.07 ± 0.10 |
| <i>CML069C</i> | Hypothetical protein                                                         | 1.07 ± 0.09 |
| <i>CMO087C</i> | Hypothetical protein                                                         | 1.07 ± 0.09 |
| <i>CMQ394C</i> | Probable platelet activating factor acetylhydrolase                          | 1.07 ± 0.10 |
| <i>CMH258C</i> | Hypothetical protein                                                         | 1.07 ± 0.14 |
| <i>CMT076C</i> | Hypothetical protein                                                         | 1.07 ± 0.12 |
| <i>CML245C</i> | Hypothetical protein                                                         | 1.07 ± 0.17 |
| <i>CMM249C</i> | Phosphoribosylpyrophosphate synthetase or ribose-phosphate pyrophosphokinase | 1.07 ± 0.09 |

|                |                                                                                            |      |   |      |
|----------------|--------------------------------------------------------------------------------------------|------|---|------|
| <i>CMQ156C</i> | Similar to Polycomb-group developmental gene, enhancer of zeste                            | 1.07 | ± | 0.03 |
| <i>CMG033C</i> | Mitochondrial intermembrane space complex subunit Tim10                                    | 1.07 | ± | 0.05 |
| <i>CMH001C</i> | Similar to hedgehog protein                                                                | 1.07 | ± | 0.04 |
| <i>CMT546C</i> | Hypothetical protein                                                                       | 1.07 | ± | 0.15 |
| <i>CMT126C</i> | Hypothetical protein                                                                       | 1.07 | ± | 0.01 |
| <i>CMP170C</i> | Similar to formamidopyrimidine-DNA glycosylase                                             | 1.07 | ± | 0.04 |
| <i>CML146C</i> | Branched-chain alpha-keto acid dihydrolipoyl acyltransferase, E2 subunit                   | 1.07 | ± | 0.07 |
| <i>CMT239C</i> | Similar to palmitoyl-protein thioesterase precursor                                        | 1.07 | ± | 0.06 |
| <i>CMN178C</i> | Serine--tRNA ligase, cytoplasmic                                                           | 1.07 | ± | 0.12 |
| <i>CML167C</i> | GMP synthase (glutamine-hydrolysing)                                                       | 1.07 | ± | 0.06 |
| <i>CML317C</i> | 60S ribosomal protein L7A                                                                  | 1.07 | ± | 0.09 |
| <i>CMH251C</i> | Similar to tRNA-pseudouridine synthase I                                                   | 1.07 | ± | 0.07 |
| <i>CMIO27C</i> | Probable AAA ATPase associated with peroxisome biosynthesis PEX1                           | 1.07 | ± | 0.03 |
| <i>CMN258C</i> | Dihydrodipicolinate reductase                                                              | 1.07 | ± | 0.03 |
| <i>CMH208C</i> | Hypothetical protein                                                                       | 1.07 | ± | 0.21 |
| <i>CMC005C</i> | Similar to trefoil factor                                                                  | 1.07 | ± | 0.04 |
| <i>CMS052C</i> | Ethanolamine-phosphate cytidylyltransferase (CTP:phosphoethanolamine cytidylyltransferase) | 1.07 | ± | 0.17 |
| <i>CMT627C</i> | 40S ribosomal protein S5                                                                   | 1.07 | ± | 0.10 |
| <i>CMH245C</i> | Similar to DNA excision repair protein HAYWIRE (ERCC-3 homolog protein)                    | 1.07 | ± | 0.05 |
| <i>CMR217C</i> | Hypothetical protein                                                                       | 1.07 | ± | 0.07 |
| <i>CMQ172C</i> | Triose-phosphate isomerase                                                                 | 1.07 | ± | 0.09 |
| <i>CMP190C</i> | Myo-inositol 1-phosphate synthase                                                          | 1.07 | ± | 0.02 |
| <i>CMP204C</i> | Similar to bestrophin                                                                      | 1.07 | ± | 0.09 |
| <i>CMS346C</i> | Small GTP-binding protein of Rab family                                                    | 1.07 | ± | 0.06 |
| <i>CMC123C</i> | Probable replication protein A (RPA)                                                       | 1.07 | ± | 0.22 |
| <i>CMH090C</i> | Cysteine--tRNA ligase, cytoplasmic                                                         | 1.07 | ± | 0.14 |
| <i>CMR196C</i> | Hypothetical protein                                                                       | 1.07 | ± | 0.20 |
| <i>CMIO43C</i> | Hypothetical protein                                                                       | 1.06 | ± | 0.05 |
| <i>CMK229C</i> | Hypothetical protein                                                                       | 1.06 | ± | 0.02 |
| <i>CMO170C</i> | Hypothetical protein                                                                       | 1.06 | ± | 0.14 |
| <i>CMQ309C</i> | Similar to glucosyltransferase                                                             | 1.06 | ± | 0.05 |
| <i>CMT473C</i> | Hypothetical protein                                                                       | 1.06 | ± | 0.09 |
| <i>CMS263C</i> | Similar to ketohexokinase (fructokinase)                                                   | 1.06 | ± | 0.11 |
| <i>CMH012C</i> | Hypothetical protein                                                                       | 1.06 | ± | 0.04 |
| <i>CMS309C</i> | Similar to microsomal glutathione S-transferase                                            | 1.06 | ± | 0.08 |
| <i>CMN246C</i> | Hypothetical protein                                                                       | 1.06 | ± | 0.02 |
| <i>CMJ309C</i> | Hypothetical protein                                                                       | 1.06 | ± | 0.15 |
| <i>CMM007C</i> | Hypothetical protein                                                                       | 1.06 | ± | 0.12 |
| <i>CMH232C</i> | Probable adenylate kinase                                                                  | 1.06 | ± | 0.13 |
| <i>CMIO31C</i> | Similar to VAMP-associated protein                                                         | 1.06 | ± | 0.09 |
| <i>CMG118C</i> | 60S acidic ribosomal protein P2                                                            | 1.06 | ± | 0.12 |
| <i>CMA127C</i> | Cyclin-dependent kinase regulatory subunit                                                 | 1.06 | ± | 0.09 |
| <i>CMT182C</i> | Hypothetical protein                                                                       | 1.06 | ± | 0.09 |

|                |                                                                   |             |
|----------------|-------------------------------------------------------------------|-------------|
| <i>CMK112C</i> | Hypothetical protein                                              | 1.06 ± 0.09 |
| <i>CMQ100C</i> | Similar to DNA repair and recombination protein (Rad51-like) Trad | 1.06 ± 0.10 |
| <i>CMM026C</i> | Polyphosphate kinase                                              | 1.06 ± 0.04 |
| <i>CMG025C</i> | Unknown RNA binding protein                                       | 1.06 ± 0.08 |
| <i>CMS136C</i> | Probable N2,N2-dimethylguanosine tRNA methyltransferase           | 1.06 ± 0.14 |
| <i>CMM335C</i> | Similar to CCR4-NOT transcription complex, subunit 4              | 1.06 ± 0.02 |
| <i>CMK016C</i> | Probable adenosine kinase                                         | 1.06 ± 0.11 |
| <i>CME017C</i> | Unknown dehydrogenase                                             | 1.06 ± 0.12 |
| <i>CMQ062C</i> | Hypothetical protein                                              | 1.06 ± 0.09 |
| <i>CMN069C</i> | Hypothetical protein                                              | 1.06 ± 0.11 |
| <i>CMF065C</i> | Mitochondrial ribosomal protein L3 precursor                      | 1.06 ± 0.05 |
| <i>CMA065C</i> | Hypothetical protein                                              | 1.06 ± 0.06 |
| <i>CME075C</i> | Hypothetical protein                                              | 1.06 ± 0.08 |
| <i>CMF101C</i> | Similar to Muconate cycloisomerase related protein                | 1.06 ± 0.01 |
| <i>CML106C</i> | 60S ribosomal protein L36                                         | 1.06 ± 0.13 |
| <i>CMJ285C</i> | 40S ribosomal protein S10                                         | 1.06 ± 0.07 |
| <i>CMF131C</i> | Hypothetical protein                                              | 1.06 ± 0.14 |
| <i>CMA025C</i> | Hypothetical protein                                              | 1.06 ± 0.06 |
| <i>CMS331C</i> | Similar to inner centromere protein                               | 1.06 ± 0.05 |
| <i>CME008C</i> | Hypoxanthine phosphoribosyltransferase (HPRT)                     | 1.06 ± 0.10 |
| <i>CMF173C</i> | DNA replication licensing factor MCM5                             | 1.06 ± 0.14 |
| <i>CMM309C</i> | Similar to WD-repeat protein aladin                               | 1.06 ± 0.04 |
| <i>CMA114C</i> | 40S ribosomal protein S24                                         | 1.06 ± 0.09 |
| <i>CMH121C</i> | Cystathionine beta-lyase                                          | 1.06 ± 0.13 |
| <i>CMD037C</i> | Similar to prefoldin 2                                            | 1.06 ± 0.04 |
| <i>CMM227C</i> | Hypothetical protein                                              | 1.06 ± 0.17 |
| <i>CML164C</i> | DNA mismatch repair protein MutS, chloroplast precursor           | 1.06 ± 0.06 |
| <i>CMF128C</i> | Probable kynureninase                                             | 1.06 ± 0.06 |
| <i>CMT217C</i> | Rab geranylgeranyltransferase, beta subunit                       | 1.06 ± 0.07 |
| <i>CMC092C</i> | Hypothetical protein                                              | 1.06 ± 0.08 |
| <i>CME025C</i> | Hypothetical protein                                              | 1.06 ± 0.05 |
| <i>CMJ156C</i> | Similar to microtubule-associated protein, RP/EB family           | 1.06 ± 0.12 |
| <i>CME009C</i> | Hypothetical protein                                              | 1.06 ± 0.15 |
| <i>CMA086C</i> | Hypothetical protein                                              | 1.06 ± 0.10 |
| <i>CMM250C</i> | Hypothetical protein                                              | 1.06 ± 0.02 |
| <i>CMC098C</i> | Anthranilate phosphoribosyltransferase                            | 1.06 ± 0.15 |
| <i>CMF180C</i> | Hypothetical protein                                              | 1.06 ± 0.04 |
| <i>CMO322C</i> | Similar to S-adenosylmethionine tRNA ribosyltransferase           | 1.06 ± 0.12 |
| <i>CMJ175C</i> | Hypothetical protein                                              | 1.06 ± 0.06 |
| <i>CMS090C</i> | Hypothetical protein                                              | 1.06 ± 0.13 |
| <i>CMS170C</i> | Hypothetical protein                                              | 1.06 ± 0.06 |
| <i>CMN271C</i> | Hypothetical protein                                              | 1.05 ± 0.02 |
| <i>CMT597C</i> | Heat shock transcription factor                                   | 1.05 ± 0.08 |

|                |                                                                     |             |
|----------------|---------------------------------------------------------------------|-------------|
| <i>CMP045C</i> | Probable replication factor C                                       | 1.05 ± 0.13 |
| <i>CME104C</i> | Similar to protein phosphatase 2A regulatory subunit B'             | 1.05 ± 0.03 |
| <i>CMF099C</i> | Casein kinase-related protein                                       | 1.05 ± 0.04 |
| <i>CMI137C</i> | Hypothetical protein                                                | 1.05 ± 0.04 |
| <i>CMH233C</i> | Similar to tRNA intron endonuclease                                 | 1.05 ± 0.07 |
| <i>CMR289C</i> | NADH dehydrogenase I (Complex I) iron-sulfur protein 75kDa subunit  | 1.05 ± 0.08 |
| <i>CMP326C</i> | Hypothetical protein                                                | 1.05 ± 0.06 |
| <i>CMN212C</i> | Similar to diaphanous-related formin                                | 1.05 ± 0.08 |
| <i>CMD123C</i> | Probable ATP-dependent DNA helicase RecQ                            | 1.05 ± 0.04 |
| <i>CMO291C</i> | Ribose 5-phosphate isomerase                                        | 1.05 ± 0.03 |
| <i>CMQ378C</i> | Hypothetical protein                                                | 1.05 ± 0.03 |
| <i>CMB026C</i> | Hypothetical protein                                                | 1.05 ± 0.06 |
| <i>CMH221C</i> | Similar to PUA domain containing RNA binding protein MCT-1          | 1.05 ± 0.12 |
| <i>CMI240C</i> | (3R)-hydroxymyristoyl-ACP dehydratase, precursor                    | 1.05 ± 0.22 |
| <i>CMR238C</i> | Hypothetical protein                                                | 1.05 ± 0.05 |
| <i>CMT452C</i> | Twinkle (putative T7 phage-type DNA helicase for mitochondrial DNA) | 1.05 ± 0.06 |
| <i>CML082C</i> | Hypothetical protein                                                | 1.05 ± 0.05 |
| <i>CMI061C</i> | X-prolyl aminopeptidase, cytosolic aminopeptidase P                 | 1.05 ± 0.14 |
| <i>CMO278C</i> | Similar to nuclear receptor binding factor-like protein             | 1.05 ± 0.04 |
| <i>CMT510C</i> | Similar to O-linked glcnac transferase, Mbb1 protein                | 1.05 ± 0.23 |
| <i>CMI158C</i> | Probable pyrroline-5-carboxylate reductase                          | 1.05 ± 0.14 |
| <i>CMK066C</i> | L-arabinose permease                                                | 1.05 ± 0.05 |
| <i>CMM105C</i> | Similar to mutT (8-oxo-dGTPase)                                     | 1.05 ± 0.08 |
| <i>CMO175C</i> | Cell division protein pelota                                        | 1.05 ± 0.09 |
| <i>CMF111C</i> | Similar to putative vesicle transport protein                       | 1.05 ± 0.02 |
| <i>CMR041C</i> | Hypothetical protein                                                | 1.05 ± 0.06 |
| <i>CMB141C</i> | Similar to peroxisomal biogenesis factor 3                          | 1.05 ± 0.06 |
| <i>CMK096C</i> | Hypothetical protein                                                | 1.05 ± 0.06 |
| <i>CMI063C</i> | 4-hydroxyphenylpyruvate dioxygenase, 4HPPD                          | 1.05 ± 0.04 |
| <i>CMI200C</i> | NADH dehydrogenase I (Complex I) alpha subcomplex 2 (B8)            | 1.05 ± 0.07 |
| <i>CMT494C</i> | Similar to pheromone shutdown protein TraB                          | 1.05 ± 0.12 |
| <i>CMO079C</i> | Hypothetical protein                                                | 1.05 ± 0.08 |
| <i>CML125C</i> | Hypothetical protein                                                | 1.05 ± 0.07 |
| <i>CMM329C</i> | Similar to ATP-dependent RNA helicase                               | 1.05 ± 0.01 |
| <i>CML027C</i> | Structural maintenance of chromosome 3 (SMC3)                       | 1.05 ± 0.15 |
| <i>CMQ239C</i> | Hypothetical protein                                                | 1.05 ± 0.02 |
| <i>CMR488C</i> | Similar to phosphatidic acid phosphatase                            | 1.05 ± 0.10 |
| <i>CMP254C</i> | Similar to telomeric repeat binding factor 1 (TRF1)                 | 1.05 ± 0.04 |
| <i>CMC117C</i> | Similar to peptidylprolyl isomerase                                 | 1.05 ± 0.04 |
| <i>CMR124C</i> | MYB-related protein                                                 | 1.05 ± 0.07 |
| <i>CMK307C</i> | Probable thylakoid lumen rotamase                                   | 1.05 ± 0.07 |
| <i>CMP249C</i> | Probable endothelin converting enzyme-1                             | 1.05 ± 0.17 |
| <i>CML115C</i> | Similar to diphosphoinositol polyphosphate phosphohydrolase         | 1.05 ± 0.08 |

|                |                                                                           |             |
|----------------|---------------------------------------------------------------------------|-------------|
| <i>CML258C</i> | Hypothetical protein                                                      | 1.05 ± 0.08 |
| <i>CMK197C</i> | Probable dolichyl phosphate glucosyltransferase                           | 1.05 ± 0.05 |
| <i>CMP054C</i> | Probable tRNA splicing endonuclease positive effector Sen1p               | 1.05 ± 0.05 |
| <i>CMF017C</i> | Similar to glutaredoxin                                                   | 1.05 ± 0.10 |
| <i>CMT499C</i> | Hypothetical protein                                                      | 1.05 ± 0.04 |
| <i>CMM199C</i> | Hypothetical protein                                                      | 1.05 ± 0.06 |
| <i>CMF118C</i> | Similar to serine/threonine protein kinase AKT                            | 1.05 ± 0.06 |
| <i>CMT448C</i> | Hypothetical protein                                                      | 1.04 ± 0.01 |
| <i>CML265C</i> | Uracil phosphoribosyltransferase                                          | 1.04 ± 0.03 |
| <i>CME013C</i> | Hypothetical protein                                                      | 1.04 ± 0.04 |
| <i>CMG153C</i> | Small GTP-binding protein of Rab family                                   | 1.04 ± 0.05 |
| <i>CMJ072C</i> | Similar to ubiquinone/menaquinone biosynthesis methyl transferase         | 1.04 ± 0.05 |
| <i>CME101C</i> | RNA polymerase III second largest subunit                                 | 1.04 ± 0.18 |
| <i>CMD135C</i> | ATP-binding cassette, sub-family G                                        | 1.04 ± 0.32 |
| <i>CML077C</i> | TFIIB                                                                     | 1.04 ± 0.08 |
| <i>CMO218C</i> | Shaggy protein kinase                                                     | 1.04 ± 0.06 |
| <i>CMN125C</i> | 40S ribosomal protein S27A, ubiquitin fusion protein                      | 1.04 ± 0.06 |
| <i>CMH190C</i> | Similar to histidine triad (HIT) protein                                  | 1.04 ± 0.15 |
| <i>CMI109C</i> | Similar to glutenin low molecular weight chain precursor                  | 1.04 ± 0.20 |
| <i>CMS068C</i> | Histone deacetylase                                                       | 1.04 ± 0.05 |
| <i>CMS081C</i> | Hypothetical protein                                                      | 1.04 ± 0.08 |
| <i>CMR147C</i> | Hypothetical protein                                                      | 1.04 ± 0.06 |
| <i>CMS162C</i> | Hypothetical protein                                                      | 1.04 ± 0.08 |
| <i>CMD110C</i> | Probable telomerase reverse transcriptase                                 | 1.04 ± 0.09 |
| <i>CMR290C</i> | Hypothetical protein                                                      | 1.04 ± 0.09 |
| <i>CMK174C</i> | Hypothetical protein                                                      | 1.04 ± 0.11 |
| <i>CMA093C</i> | ATP-dependent DNA helicase                                                | 1.04 ± 0.03 |
| <i>CML267C</i> | Hypothetical protein                                                      | 1.04 ± 0.08 |
| <i>CMO084C</i> | Similar to C3HC4 zinc-binding integral peroxisomal membrane protein PEX12 | 1.04 ± 0.05 |
| <i>CMO104C</i> | Flavin-containing amine oxidase                                           | 1.04 ± 0.10 |
| <i>CMS453C</i> | Similar to mitochondrial carrier protein                                  | 1.04 ± 0.11 |
| <i>CMT357C</i> | Similar to splicing factor 3b subunit 2, 145kDa                           | 1.04 ± 0.02 |
| <i>CMF071C</i> | Hypothetical protein                                                      | 1.04 ± 0.04 |
| <i>CMB127C</i> | Amino-acid N-acetyltransferase                                            | 1.04 ± 0.08 |
| <i>CMM129C</i> | Hypothetical protein                                                      | 1.04 ± 0.06 |
| <i>CML195C</i> | Hypothetical protein                                                      | 1.04 ± 0.02 |
| <i>CML272C</i> | Hypothetical protein                                                      | 1.04 ± 0.14 |
| <i>CMT486C</i> | Similar to ribosome binding factor A                                      | 1.04 ± 0.04 |
| <i>CMJ011C</i> | Similar to 26S proteasome regulatory subunit RPN12                        | 1.04 ± 0.06 |
| <i>CMT240C</i> | Indole-3-glycerol phosphate synthase                                      | 1.04 ± 0.13 |
| <i>CME111C</i> | Polypeptide deformylase (formylmethionine deformylase)                    | 1.04 ± 0.08 |
| <i>CMI146C</i> | Similar to folate transporter/carrier                                     | 1.04 ± 0.08 |
| <i>CMO135C</i> | Probable catabolite repressor protein (CCR4)-associative factor 1         | 1.04 ± 0.06 |



|                 |                                                                                  |      |   |      |
|-----------------|----------------------------------------------------------------------------------|------|---|------|
| <i>CMIO16C</i>  | Similar to 3,4-dihydroxy-5-hexaprenylbenzoate methyltransferase, mitochondrial   | 1.04 | ± | 0.08 |
| <i>CMII27C</i>  | Hypothetical protein                                                             | 1.04 | ± | 0.03 |
| <i>CMM331C</i>  | Hypothetical protein                                                             | 1.04 | ± | 0.10 |
| <i>CML163C</i>  | Hypothetical protein                                                             | 1.04 | ± | 0.03 |
| <i>CMII64C</i>  | Hypothetical protein                                                             | 1.04 | ± | 0.02 |
| <i>CMN121C</i>  | Hypothetical protein                                                             | 1.04 | ± | 0.02 |
| <i>CMS485C</i>  | Unknown nucleolar protein                                                        | 1.04 | ± | 0.08 |
| <i>CMIO68C</i>  | Hypothetical protein                                                             | 1.04 | ± | 0.03 |
| <i>CMII300C</i> | Uracil-DNA-glycosylase                                                           | 1.04 | ± | 0.15 |
| <i>CMN296C</i>  | Hypothetical protein                                                             | 1.04 | ± | 0.10 |
| <i>CMT292C</i>  | Ribose-phosphate pyrophosphokinase                                               | 1.04 | ± | 0.11 |
| <i>CMP263C</i>  | Hypothetical protein                                                             | 1.04 | ± | 0.08 |
| <i>CMH250C</i>  | Cytochrome-b5 reductase                                                          | 1.04 | ± | 0.07 |
| <i>CMA067C</i>  | Mitochondrial ribosomal protein L32 precursor                                    | 1.04 | ± | 0.08 |
| <i>CMJ039C</i>  | ATP-binding cassette, sub-family A                                               | 1.04 | ± | 0.08 |
| <i>CMM256C</i>  | Similar to RNA polymerase I specific transcription initiation factor RRN3        | 1.04 | ± | 0.18 |
| <i>CMO269C</i>  | Probable glucose 6 phosphate/phosphate translocator                              | 1.04 | ± | 0.17 |
| <i>CMG146C</i>  | GTP-binding protein of Obg family                                                | 1.04 | ± | 0.09 |
| <i>CME134C</i>  | Hypothetical protein                                                             | 1.04 | ± | 0.04 |
| <i>CMM289C</i>  | Molybdopterin synthase sulphurylase MoeB                                         | 1.04 | ± | 0.04 |
| <i>CMQ331C</i>  | Similar to DEAH-box RNA helicase Dhr1                                            | 1.04 | ± | 0.22 |
| <i>CMJ261C</i>  | DNA replication licensing factor MCM6                                            | 1.04 | ± | 0.06 |
| <i>CMJ215C</i>  | Unknown homeobox protein                                                         | 1.04 | ± | 0.09 |
| <i>CMP345C</i>  | Valine--tRNA ligase, cytoplasmic                                                 | 1.04 | ± | 0.15 |
| <i>CMR389C</i>  | Hypothetical protein                                                             | 1.04 | ± | 0.02 |
| <i>CMR012C</i>  | Sulfolipid biosynthesis protein SQD1 (UDP-sulfoquinovose synthesis), chloroplast | 1.04 | ± | 0.05 |
| <i>CME004C</i>  | Ubiquitin-like protein Smt3                                                      | 1.04 | ± | 0.01 |
| <i>CMM197C</i>  | Hypothetical protein                                                             | 1.04 | ± | 0.09 |
| <i>CMS172C</i>  | Similar to ankyrin 1                                                             | 1.04 | ± | 0.17 |
| <i>CMT585C</i>  | Hypothetical protein                                                             | 1.04 | ± | 0.04 |
| <i>CMK284C</i>  | Similar to DNA primase large subunit                                             | 1.04 | ± | 0.04 |
| <i>CMM014C</i>  | Eukaryotic translation initiation factor eIF-2B gamma subunit                    | 1.04 | ± | 0.16 |
| <i>CMQ232C</i>  | Similar to GTP-binding protein                                                   | 1.04 | ± | 0.13 |
| <i>CMN285C</i>  | Phosphoenolpyruvate carboxykinase (ATP)                                          | 1.04 | ± | 0.10 |
| <i>CMP192C</i>  | Hypothetical protein                                                             | 1.04 | ± | 0.09 |
| <i>CMD085C</i>  | Hypothetical protein                                                             | 1.04 | ± | 0.07 |
| <i>CMA044C</i>  | Probable deoxyribodipyrimidine photolyase                                        | 1.03 | ± | 0.05 |
| <i>CMS486C</i>  | Hypothetical protein                                                             | 1.03 | ± | 0.08 |
| <i>CMC059C</i>  | GTP-binding protein of engA family                                               | 1.03 | ± | 0.02 |
| <i>CMO265C</i>  | Hypothetical protein                                                             | 1.03 | ± | 0.04 |
| <i>CMQ122C</i>  | Small GTP-binding protein of Rab family                                          | 1.03 | ± | 0.12 |
| <i>CML252C</i>  | Probable peroxisomal biogenesis factor 6                                         | 1.03 | ± | 0.15 |
| <i>CMO034C</i>  | Similar to postmeiotic segregation increased 2                                   | 1.03 | ± | 0.06 |

|                |                                                                          |             |
|----------------|--------------------------------------------------------------------------|-------------|
| <i>CMS011C</i> | Hypothetical protein                                                     | 1.03 ± 0.10 |
| <i>CMR015C</i> | Sulfoquinovosyldiacylglycerol biosynthesis protein                       | 1.03 ± 0.04 |
| <i>CME124C</i> | Hypothetical protein                                                     | 1.03 ± 0.05 |
| <i>CMM072C</i> | Sigma subunit for chloroplast RNA polymerase                             | 1.03 ± 0.02 |
| <i>CMD053C</i> | Hypothetical protein                                                     | 1.03 ± 0.02 |
| <i>CMH157C</i> | Hypothetical protein                                                     | 1.03 ± 0.16 |
| <i>CMT541C</i> | Similar to mitochondrial carrier protein precursor                       | 1.03 ± 0.16 |
| <i>CMC131C</i> | Hypothetical protein                                                     | 1.03 ± 0.04 |
| <i>CMA135C</i> | Similar to androgen-regulated short-chain dehydrogenase/reductase 1      | 1.03 ± 0.04 |
| <i>CMQ128C</i> | Conserved unknown protein                                                | 1.03 ± 0.01 |
| <i>CMJ091C</i> | Small GTP-binding protein of Rho family                                  | 1.03 ± 0.13 |
| <i>CMC048C</i> | Hypothetical protein                                                     | 1.03 ± 0.06 |
| <i>CMO164C</i> | Similar to acylphosphatase                                               | 1.03 ± 0.04 |
| <i>CMQ248C</i> | Hypothetical protein                                                     | 1.03 ± 0.04 |
| <i>CML101C</i> | MYB-related protein                                                      | 1.03 ± 0.02 |
| <i>CMT379C</i> | 20S core proteasome subunit alpha 4                                      | 1.03 ± 0.12 |
| <i>CML210C</i> | Biotin synthetase                                                        | 1.03 ± 0.11 |
| <i>CMM116C</i> | Hypothetical protein                                                     | 1.03 ± 0.07 |
| <i>CME063C</i> | Similar to splicing factor 3b subunit 4 (U2 snRNP)                       | 1.03 ± 0.10 |
| <i>CMK041C</i> | Pyruvate kinase                                                          | 1.03 ± 0.14 |
| <i>CMT451C</i> | RNA polymerase I, II, III common subunit                                 | 1.03 ± 0.05 |
| <i>CMQ160C</i> | Cytochrome c reductase (Complex III) subunit 10(XI)                      | 1.03 ± 0.05 |
| <i>CMR497C</i> | Kinesin-related protein                                                  | 1.03 ± 0.10 |
| <i>CMR127C</i> | Similar to putative v-snare binding protein                              | 1.03 ± 0.02 |
| <i>CMN085C</i> | Fructose-6-phosphate 2-kinase/fructose-2,6-bisphosphatase                | 1.03 ± 0.03 |
| <i>CME046C</i> | 60S ribosomal protein L29                                                | 1.03 ± 0.03 |
| <i>CMG197C</i> | Hypothetical protein                                                     | 1.03 ± 0.11 |
| <i>CMM325C</i> | Similar to RNA polymerase III transcription factor TFIIIC                | 1.03 ± 0.02 |
| <i>CMQ243C</i> | Vesicular-fusion protein NSF (N-ethylmaleimide sensitive fusion protein) | 1.03 ± 0.08 |
| <i>CMC148C</i> | Aspartate aminotransferase                                               | 1.03 ± 0.03 |
| <i>CMS311C</i> | Similar to bacterioferritin comigratory protein                          | 1.03 ± 0.08 |
| <i>CML263C</i> | Hypothetical protein                                                     | 1.03 ± 0.05 |
| <i>CMT294C</i> | Similar to apoptotic cell death regulator DAD1                           | 1.03 ± 0.08 |
| <i>CMN300C</i> | Similar to hedgehog protein                                              | 1.03 ± 0.08 |
| <i>CMI087C</i> | Hypothetical protein                                                     | 1.03 ± 0.00 |
| <i>CMT186C</i> | Hypothetical protein                                                     | 1.03 ± 0.06 |
| <i>CMS326C</i> | Chorismate mutase (CM)/prephenate dehydrogenase (PDH) (T-protein)        | 1.03 ± 0.07 |
| <i>CMP188C</i> | Hypothetical protein                                                     | 1.03 ± 0.21 |
| <i>CMS236C</i> | Probable excision repair protein (ERCC5)                                 | 1.03 ± 0.10 |
| <i>CMG079C</i> | Similar to DNA excision repair protein ERCC-1                            | 1.03 ± 0.07 |
| <i>CMT233C</i> | Hypothetical protein                                                     | 1.03 ± 0.11 |
| <i>CMS339C</i> | Probable pyridoxal kinase                                                | 1.03 ± 0.03 |
| <i>CMB135C</i> | Hypothetical protein                                                     | 1.03 ± 0.06 |

|                |                                                                                     |             |
|----------------|-------------------------------------------------------------------------------------|-------------|
| <i>CMQ301C</i> | Probable alcohol dehydrogenase                                                      | 1.03 ± 0.32 |
| <i>CMB156C</i> | Probable phosphoinositide phosphatase SAC1                                          | 1.03 ± 0.06 |
| <i>CMQ102C</i> | Hypothetical protein                                                                | 1.03 ± 0.05 |
| <i>CMN194C</i> | Cathepsin D precursor                                                               | 1.03 ± 0.05 |
| <i>CMG189C</i> | Chromosome assembly protein SMC2                                                    | 1.03 ± 0.06 |
| <i>CMS007C</i> | Similar to 4-methyl-5(beta-hydroxyethyl)-thiazol monophosphate biosynthesis protein | 1.03 ± 0.02 |
| <i>CMG019C</i> | Nitrate reductase                                                                   | 1.03 ± 0.05 |
| <i>CMK085C</i> | Hypothetical protein                                                                | 1.03 ± 0.03 |
| <i>CMN181C</i> | Branched-chain-amino-acid transaminase, mitochondrial precursor                     | 1.03 ± 0.08 |
| <i>CMO333C</i> | Hypothetical protein                                                                | 1.03 ± 0.07 |
| <i>CMG008C</i> | Unknown Zinc finger protein                                                         | 1.03 ± 0.02 |
| <i>CMC079C</i> | Hypothetical protein                                                                | 1.03 ± 0.04 |
| <i>CMS327C</i> | Pyruvate dehydrogenase E1 beta subunit, mitochondrial precursor                     | 1.02 ± 0.15 |
| <i>CMR037C</i> | Probable serine rich pumilio family rna binding domain protein                      | 1.02 ± 0.18 |
| <i>CME061C</i> | Similar to protein-tyrosine-phosphatase-like protein                                | 1.02 ± 0.18 |
| <i>CMP014C</i> | Hypothetical protein                                                                | 1.02 ± 0.10 |
| <i>CMP351C</i> | Hypothetical protein                                                                | 1.02 ± 0.06 |
| <i>CMM045C</i> | Stearoyl-CoA desaturase                                                             | 1.02 ± 0.09 |
| <i>CMM151C</i> | Probable histone acetyltransferase GCN5                                             | 1.02 ± 0.06 |
| <i>CMH087C</i> | Hypothetical protein                                                                | 1.02 ± 0.09 |
| <i>CMR476C</i> | Similar to glycerol-3-phosphate dehydrogenase                                       | 1.02 ± 0.04 |
| <i>CMP290C</i> | Hypothetical protein                                                                | 1.02 ± 0.05 |
| <i>CMT485C</i> | Mitochondrial ribosomal protein S7, precursor                                       | 1.02 ± 0.13 |
| <i>CMP162C</i> | Hypothetical protein                                                                | 1.02 ± 0.06 |
| <i>CMR489C</i> | Hypothetical protein                                                                | 1.02 ± 0.04 |
| <i>CMS417C</i> | Mitochondrial ribosomal protein L22 precursor                                       | 1.02 ± 0.02 |
| <i>CMS279C</i> | Transmembrane protein FT27/PFT27-like                                               | 1.02 ± 0.05 |
| <i>CMG084C</i> | Hypothetical protein                                                                | 1.02 ± 0.11 |
| <i>CMI207C</i> | Hypothetical protein                                                                | 1.02 ± 0.11 |
| <i>CMB043C</i> | Activity of bc1 complex ABC1                                                        | 1.02 ± 0.07 |
| <i>CMR183C</i> | WNK-like protein kinase                                                             | 1.02 ± 0.07 |
| <i>CMN311C</i> | Similar to phosphoglycerate mutase                                                  | 1.02 ± 0.25 |
| <i>CMP270C</i> | Hypothetical protein                                                                | 1.02 ± 0.07 |
| <i>CMI278C</i> | Hypothetical protein                                                                | 1.02 ± 0.03 |
| <i>CMH223C</i> | Hypothetical protein                                                                | 1.02 ± 0.08 |
| <i>CMD011C</i> | Probable MPBQ/MSBQ methyltransferase                                                | 1.02 ± 0.24 |
| <i>CMF178C</i> | Glutamyl-tRNA amidotransferase subunit B                                            | 1.02 ± 0.08 |
| <i>CMN199C</i> | DNA polymerase delta catalytic chain                                                | 1.02 ± 0.06 |
| <i>CMI291C</i> | Similar to replication protein A 30kDa                                              | 1.02 ± 0.08 |
| <i>CMR313C</i> | Probable oligoendopeptidase F                                                       | 1.02 ± 0.08 |
| <i>CMS493C</i> | Hypothetical protein, conserved in bacteria                                         | 1.02 ± 0.03 |
| <i>CMO215C</i> | Similar to RNA methyltransferase                                                    | 1.02 ± 0.04 |
| <i>CMH277C</i> | Hypothetical protein                                                                | 1.02 ± 0.02 |

|                |                                                                                      |             |
|----------------|--------------------------------------------------------------------------------------|-------------|
| <i>CMP161C</i> | Similar to dual specificity protein phosphatase                                      | 1.02 ± 0.07 |
| <i>CMQ153C</i> | Hypothetical protein                                                                 | 1.02 ± 0.06 |
| <i>CMD026C</i> | RNA polymerase II subunit G                                                          | 1.02 ± 0.03 |
| <i>CMK227C</i> | Hypothetical protein                                                                 | 1.02 ± 0.07 |
| <i>CMG027C</i> | Hypothetical protein                                                                 | 1.02 ± 0.11 |
| <i>CMT278C</i> | tRNA (5-methylaminomethyl-2-thiouridylate)-methyltransferase                         | 1.02 ± 0.02 |
| <i>CMR222C</i> | Hypothetical protein                                                                 | 1.02 ± 0.03 |
| <i>CMR180C</i> | ATP-binding subunit of unknown ABC transporter                                       | 1.02 ± 0.10 |
| <i>CMIO23C</i> | Hypothetical protein                                                                 | 1.02 ± 0.06 |
| <i>CMP309C</i> | Hypothetical protein                                                                 | 1.02 ± 0.06 |
| <i>CMT321C</i> | Protein translation factor Sui1 homolog                                              | 1.02 ± 0.27 |
| <i>CMJ103C</i> | Hypothetical protein                                                                 | 1.02 ± 0.19 |
| <i>CMN273C</i> | Hypothetical protein                                                                 | 1.02 ± 0.14 |
| <i>CMM241C</i> | Hypothetical protein                                                                 | 1.02 ± 0.09 |
| <i>CMT029C</i> | N-formylglutamate deformylase                                                        | 1.02 ± 0.18 |
| <i>CMQ105C</i> | Hypothetical protein                                                                 | 1.02 ± 0.06 |
| <i>CMG085C</i> | Similar to BET3 involved in targeting and fusion of ER to Golgi transport vesicles   | 1.02 ± 0.02 |
| <i>CMF181C</i> | Small GTP-binding protein of Rab family                                              | 1.02 ± 0.05 |
| <i>CMP160C</i> | Protease IV                                                                          | 1.02 ± 0.08 |
| <i>CMJ233C</i> | Hypothetical protein                                                                 | 1.02 ± 0.07 |
| <i>CMR440C</i> | Sulfite reductase (NADPH) flavoprotein alpha-component                               | 1.02 ± 0.18 |
| <i>CMR305C</i> | Similar to pleiotropic regulator 1 (PRL1)                                            | 1.02 ± 0.04 |
| <i>CMF129C</i> | Mitochondrial chaperonin hsp10, precursor                                            | 1.02 ± 0.04 |
| <i>CMP105C</i> | Hypothetical protein                                                                 | 1.02 ± 0.01 |
| <i>CMS023C</i> | Similar to ARE1-like protein                                                         | 1.02 ± 0.05 |
| <i>CME050C</i> | Similar to nuclear LIM interactor-interacting factor                                 | 1.02 ± 0.23 |
| <i>CMF022C</i> | tRNA pseudouridine 55 synthase                                                       | 1.02 ± 0.04 |
| <i>CMS315C</i> | Similar to electron-transfer-flavoprotein, beta polypeptide, mitochondrial precursor | 1.02 ± 0.07 |
| <i>CMD048C</i> | Cytochrome c reductase (Complex III) subunit 9(X)                                    | 1.02 ± 0.07 |
| <i>CMR425C</i> | Probable rRNA methyltransferase                                                      | 1.02 ± 0.14 |
| <i>CMC168C</i> | Hypothetical protein                                                                 | 1.02 ± 0.11 |
| <i>CMD058C</i> | Fumarate hydratase precursor                                                         | 1.01 ± 0.06 |
| <i>CMR406C</i> | Hypothetical protein                                                                 | 1.01 ± 0.02 |
| <i>CMH028C</i> | Probable alpha-1,3-glucosyltransferase ALG6                                          | 1.01 ± 0.04 |
| <i>CMG050C</i> | Alpha-galactosidase                                                                  | 1.01 ± 0.19 |
| <i>CMR200C</i> | Hypothetical protein                                                                 | 1.01 ± 0.09 |
| <i>CMS299C</i> | Biotin carboxylase, chloroplast precursor                                            | 1.01 ± 0.12 |
| <i>CMR308C</i> | Hypothetical protein                                                                 | 1.01 ± 0.04 |
| <i>CML182C</i> | Hypothetical protein                                                                 | 1.01 ± 0.02 |
| <i>CMM164C</i> | Hypothetical protein                                                                 | 1.01 ± 0.03 |
| <i>CMT482C</i> | Hypothetical protein                                                                 | 1.01 ± 0.02 |
| <i>CMR218C</i> | Hypothetical protein                                                                 | 1.01 ± 0.03 |
| <i>CMT220C</i> | Chlorophyll a synthase                                                               | 1.01 ± 0.03 |

|                |                                                          |             |
|----------------|----------------------------------------------------------|-------------|
| <i>CML035C</i> | Hypothetical protein                                     | 1.01 ± 0.12 |
| <i>CMP086C</i> | Hypothetical protein                                     | 1.01 ± 0.08 |
| <i>CMO204C</i> | Similar to retinoblastoma binding protein 2              | 1.01 ± 0.09 |
| <i>CMI060C</i> | Hypothetical protein                                     | 1.01 ± 0.09 |
| <i>CMO130C</i> | ATP-binding cassette, sub-family G                       | 1.01 ± 0.09 |
| <i>CMD118C</i> | Beta-ketoacyl-CoA synthase                               | 1.01 ± 0.07 |
| <i>CMM295C</i> | Hypothetical protein                                     | 1.01 ± 0.12 |
| <i>CMS049C</i> | Hypothetical protein                                     | 1.01 ± 0.04 |
| <i>CMT130C</i> | GTP-binding protein of Nug1 family                       | 1.01 ± 0.06 |
| <i>CMP081C</i> | Hypothetical protein                                     | 1.01 ± 0.10 |
| <i>CMG090C</i> | Hypothetical protein                                     | 1.01 ± 0.13 |
| <i>CMR044C</i> | Hypothetical protein                                     | 1.01 ± 0.19 |
| <i>CMN291C</i> | Hypothetical protein                                     | 1.01 ± 0.17 |
| <i>CMS102C</i> | Eukaryotic translation initiation factor eIF-3 subunit 6 | 1.01 ± 0.14 |
| <i>CMN275C</i> | Hypothetical protein                                     | 1.01 ± 0.09 |
| <i>CMQ103C</i> | Probable pantothenate kinase                             | 1.01 ± 0.09 |
| <i>CME086C</i> | Hypothetical protein                                     | 1.01 ± 0.05 |
| <i>CMS335C</i> | Hypothetical protein                                     | 1.01 ± 0.01 |
| <i>CML085C</i> | Similar to UDP-galactose transporter                     | 1.01 ± 0.09 |
| <i>CMT228C</i> | Similar to acylaminoacyl-peptidase                       | 1.01 ± 0.16 |
| <i>CMR148C</i> | 40S ribosomal protein S19                                | 1.01 ± 0.08 |
| <i>CMT602C</i> | Similar to lanthionine synthetase                        | 1.01 ± 0.07 |
| <i>CMQ195C</i> | Cyclin dependent kinase, C-type                          | 1.01 ± 0.03 |
| <i>CMR288C</i> | Probable molybdopterin synthase Cnx2                     | 1.01 ± 0.07 |
| <i>CMN136C</i> | Hypothetical protein                                     | 1.01 ± 0.05 |
| <i>CMO190C</i> | Hypothetical protein                                     | 1.01 ± 0.09 |
| <i>CMD021C</i> | GTP-binding protein of LepA family                       | 1.01 ± 0.04 |
| <i>CMK139C</i> | Enoyl-CoA hydratase, mitochondrial precursor             | 1.01 ± 0.11 |
| <i>CMN051C</i> | Similar to 6-pyruvoyltetrahydropterin synthase           | 1.01 ± 0.06 |
| <i>CMQ078C</i> | 60S ribosomal protein L6                                 | 1.01 ± 0.06 |
| <i>CMM010C</i> | Hypothetical protein                                     | 1.01 ± 0.06 |
| <i>CMS344C</i> | Probable O-sialoglycoprotein endopeptidase               | 1.01 ± 0.04 |
| <i>CMQ044C</i> | Aurora kinase                                            | 1.01 ± 0.06 |
| <i>CMJ298C</i> | Hypothetical protein                                     | 1.01 ± 0.07 |
| <i>CMO089C</i> | Plastid division protein FtsZ                            | 1.01 ± 0.11 |
| <i>CMG156C</i> | Probable nicotinate phosphoribosyltransferase            | 1.01 ± 0.05 |
| <i>CMO315C</i> | Similar to magnesium transporter Mrs2p                   | 1.01 ± 0.10 |
| <i>CMS385C</i> | Proline iminopeptidase                                   | 1.01 ± 0.03 |
| <i>CMB005C</i> | RNA polymerase III subunit C34                           | 1.01 ± 0.02 |
| <i>CML165C</i> | Hypothetical protein                                     | 1.01 ± 0.06 |
| <i>CMS408C</i> | Hypothetical protein                                     | 1.01 ± 0.07 |
| <i>CMT308C</i> | Hypothetical protein                                     | 1.01 ± 0.13 |
| <i>CMC034C</i> | Probable tyrosine aminotransferase                       | 1.01 ± 0.06 |

|                |                                                                     |             |
|----------------|---------------------------------------------------------------------|-------------|
| <i>CML200C</i> | Hypothetical protein                                                | 1.01 ± 0.09 |
| <i>CMQ359C</i> | Mannose-6-phosphate isomerase                                       | 1.01 ± 0.07 |
| <i>CMH018C</i> | Hypothetical protein                                                | 1.01 ± 0.03 |
| <i>CMR401C</i> | Transposon                                                          | 1.01 ± 0.11 |
| <i>CMS281C</i> | Hypothetical protein                                                | 1.01 ± 0.06 |
| <i>CMM042C</i> | Hypothetical protein                                                | 1.00 ± 0.06 |
| <i>CML073C</i> | Similar to actin-related protein                                    | 1.00 ± 0.02 |
| <i>CMB123C</i> | Similar to tRNA (1-methyladenosine) methyltransferase subunit GCD14 | 1.00 ± 0.04 |
| <i>CMT350C</i> | DNA polymerase delta, subunit D                                     | 1.00 ± 0.03 |
| <i>CMP346C</i> | Hypothetical protein                                                | 1.00 ± 0.01 |
| <i>CMQ162C</i> | Hypothetical protein                                                | 1.00 ± 0.04 |
| <i>CMI265C</i> | Hypothetical protein                                                | 1.00 ± 0.09 |
| <i>CMM173C</i> | Hypothetical protein                                                | 1.00 ± 0.05 |
| <i>CMT419C</i> | Mitochondrial ribosome releasing factor RRF                         | 1.00 ± 0.07 |
| <i>CMO342C</i> | Similar to Sm protein G                                             | 1.00 ± 0.04 |
| <i>CME118C</i> | Hypothetical protein                                                | 1.00 ± 0.03 |
| <i>CMD183C</i> | Small GTP-binding protein of Rab family                             | 1.00 ± 0.05 |
| <i>CMB112C</i> | Similar to nucleoporin                                              | 1.00 ± 0.06 |
| <i>CMP061C</i> | Hypothetical protein                                                | 1.00 ± 0.10 |
| <i>CMS249C</i> | Unknown protein (similar to predicted phosphoesterase)              | 1.00 ± 0.06 |
| <i>CMM136C</i> | Hypothetical protein                                                | 1.00 ± 0.04 |
| <i>CMB074C</i> | Hypothetical protein                                                | 1.00 ± 0.05 |
| <i>CMO314C</i> | Photosystem II stability/assembly factor HCF136                     | 1.00 ± 0.20 |
| <i>CMG057C</i> | 40S ribosomal protein S20                                           | 1.00 ± 0.08 |
| <i>CML065C</i> | Probable arginine-tRNA-protein transferase                          | 1.00 ± 0.11 |
| <i>CMC036C</i> | Similar to ATP-dependent RNA helicase                               | 1.00 ± 0.12 |
| <i>CMP315C</i> | Hypothetical protein                                                | 1.00 ± 0.06 |
| <i>CME168C</i> | Hypothetical protein                                                | 1.00 ± 0.00 |
| <i>CMC072C</i> | Similar to Transmembrane protein Tmp21 precursor                    | 1.00 ± 0.13 |
| <i>CMT373C</i> | GTP binding protein HflX                                            | 1.00 ± 0.07 |
| <i>CMK217C</i> | Similar to 1-acyl-sn-glycerol-3-phosphate acyltransferase           | 1.00 ± 0.11 |
| <i>CMO009C</i> | Similar to splicing factor RSp31                                    | 1.00 ± 0.06 |
| <i>CMK173C</i> | Hypothetical protein                                                | 1.00 ± 0.05 |
| <i>CMI271C</i> | MGDG synthase                                                       | 1.00 ± 0.08 |
| <i>CMT443C</i> | RING zinc finger protein                                            | 1.00 ± 0.13 |
| <i>CMM041C</i> | Hypothetical protein                                                | 1.00 ± 0.08 |
| <i>CMF061C</i> | Hypothetical protein                                                | 1.00 ± 0.06 |
| <i>CML034C</i> | Similar to vesicle docking protein SEC34                            | 1.00 ± 0.07 |
| <i>CMM203C</i> | Hypothetical protein                                                | 1.00 ± 0.05 |
| <i>CMO310C</i> | 60S ribosomal protein L7                                            | 1.00 ± 0.05 |
| <i>CMT562C</i> | Probable telomerase regulation-associated protein                   | 1.00 ± 0.09 |
| <i>CMI099C</i> | Hypothetical protein                                                | 1.00 ± 0.03 |
| <i>CMK124C</i> | Similar to peroxisomal targeting signal type 1 (PTS1) receptor PEX5 | 1.00 ± 0.09 |

|                |                                                                       |             |
|----------------|-----------------------------------------------------------------------|-------------|
| <i>CML338C</i> | Unknown rhomboid family protein                                       | 1.00 ± 0.09 |
| <i>CMG201C</i> | Hypothetical protein                                                  | 1.00 ± 0.24 |
| <i>CMQ444C</i> | Hypothetical protein                                                  | 1.00 ± 0.05 |
| <i>CMS152C</i> | Probable sodium/hydrogen antiporter                                   | 1.00 ± 0.06 |
| <i>CMK299C</i> | Hypothetical protein                                                  | 1.00 ± 0.08 |
| <i>CMC041C</i> | Hypothetical protein                                                  | 1.00 ± 0.08 |
| <i>CMJ073C</i> | Hypothetical protein                                                  | 1.00 ± 0.04 |
| <i>CMA099C</i> | Hypothetical protein                                                  | 1.00 ± 0.12 |
| <i>CMF185C</i> | 1-acylglycerol-3-phosphate O-acyltransferase                          | 1.00 ± 0.07 |
| <i>CMT165C</i> | 2-dehydro-3-deoxyphosphoheptonate aldolase                            | 1.00 ± 0.09 |
| <i>CMT493C</i> | Organelle division protein FtsZ                                       | 1.00 ± 0.05 |
| <i>CMK116C</i> | Hypothetical protein                                                  | 1.00 ± 0.06 |
| <i>CML149C</i> | Mitochondrial ribosomal protein L30 precursor                         | 1.00 ± 0.05 |
| <i>CMM147C</i> | Similar to signal recognition particle (SRP) receptor beta subunit    | 1.00 ± 0.02 |
| <i>CMT396C</i> | Similar to class 2 transcription repressor NC2 alpha subunit          | 1.00 ± 0.07 |
| <i>CMS182C</i> | Hypothetical protein                                                  | 1.00 ± 0.04 |
| <i>CMN232C</i> | Hypothetical protein                                                  | 1.00 ± 0.04 |
| <i>CMP026C</i> | Probable low-affinity phosphate transporter Pho91p                    | 1.00 ± 0.03 |
| <i>CMT184C</i> | GTP-binding protein                                                   | 1.00 ± 0.09 |
| <i>CMT019C</i> | Hypothetical protein                                                  | 1.00 ± 0.08 |
| <i>CMN200C</i> | Hypothetical protein                                                  | 1.00 ± 0.07 |
| <i>CMQ250C</i> | Probable phosphoserine phosphatase                                    | 1.00 ± 0.03 |
| <i>CMJ201C</i> | Delta 9 acyl-lipid fatty acid desaturase                              | 1.00 ± 0.08 |
| <i>CMK009C</i> | Hypothetical protein                                                  | 1.00 ± 0.08 |
| <i>CMQ266C</i> | Hypothetical protein                                                  | 1.00 ± 0.07 |
| <i>CMI254C</i> | Hypothetical protein                                                  | 1.00 ± 0.03 |
| <i>CMQ154C</i> | Fumarylacetoacetase                                                   | 1.00 ± 0.04 |
| <i>CMI262C</i> | NADH dehydrogenase I (Complex I) alpha subcomplex 6 (B14)             | 1.00 ± 0.03 |
| <i>CMH274C</i> | Similar to deoxyribodipyrimidine photolyase                           | 1.00 ± 0.06 |
| <i>CMK163C</i> | Hypothetical protein                                                  | 1.00 ± 0.05 |
| <i>CMK036C</i> | Hypothetical protein                                                  | 1.00 ± 0.04 |
| <i>CML122C</i> | Similar to oxysterol binding protein                                  | 0.99 ± 0.03 |
| <i>CMO312C</i> | Similar to pre-mRNA cleavage complex II protein Clp1                  | 0.99 ± 0.12 |
| <i>CMP253C</i> | Similar to ion transporter                                            | 0.99 ± 0.07 |
| <i>CMK060C</i> | Nucleoside-diphosphate kinase                                         | 0.99 ± 0.01 |
| <i>CMI051C</i> | Similar to thiamine triphosphatase                                    | 0.99 ± 0.11 |
| <i>CMG072C</i> | Hypothetical protein                                                  | 0.99 ± 0.09 |
| <i>CMS499C</i> | Hypothetical protein                                                  | 0.99 ± 0.05 |
| <i>CMT626C</i> | Probable ribonuclease H                                               | 0.99 ± 0.05 |
| <i>CMT412C</i> | Isocitrate dehydrogenase (NAD <sup>+</sup> ) subunit 1, mitochondrial | 0.99 ± 0.02 |
| <i>CME191C</i> | Hypothetical protein                                                  | 0.99 ± 0.07 |
| <i>CME069C</i> | Hypothetical protein                                                  | 0.99 ± 0.12 |
| <i>CMQ291C</i> | dCMP deaminase                                                        | 0.99 ± 0.02 |

|                |                                                                                     |             |
|----------------|-------------------------------------------------------------------------------------|-------------|
| <i>CMH030C</i> | Hypothetical protein                                                                | 0.99 ± 0.10 |
| <i>CMC080C</i> | Similar to biotin holocarboxylase synthetase                                        | 0.99 ± 0.08 |
| <i>CMS295C</i> | MAP kinase                                                                          | 0.99 ± 0.02 |
| <i>CMD073C</i> | Hypothetical protein                                                                | 0.99 ± 0.02 |
| <i>CMT522C</i> | Hypothetical protein                                                                | 0.99 ± 0.05 |
| <i>CMR284C</i> | Similar to arsenical pump-driving ATPase                                            | 0.99 ± 0.11 |
| <i>CML326C</i> | Hypothetical protein                                                                | 0.99 ± 0.06 |
| <i>CMQ082C</i> | Histidinol dehydrogenase                                                            | 0.99 ± 0.03 |
| <i>CMD121C</i> | Probable photolyase/blue-light receptor (PHR2)                                      | 0.99 ± 0.05 |
| <i>CMQ147C</i> | Hypothetical protein                                                                | 0.99 ± 0.07 |
| <i>CMP119C</i> | GTP cyclohydrolase II/3,4-dihydroxy-2-butanone 4-phosphate synthase (dhbp synthase) | 0.99 ± 0.03 |
| <i>CMT508C</i> | Mitochondrial ribosomal protein L17 precursor                                       | 0.99 ± 0.06 |
| <i>CMR226C</i> | Hypothetical protein                                                                | 0.99 ± 0.02 |
| <i>CMH011C</i> | Hypothetical protein                                                                | 0.99 ± 0.08 |
| <i>CMK050C</i> | Lycopene beta cyclase, chloroplast precursor                                        | 0.99 ± 0.10 |
| <i>CMB025C</i> | Protoporphyrinogen IX oxidase (PPO)                                                 | 0.99 ± 0.04 |
| <i>CMS337C</i> | Hypothetical protein                                                                | 0.99 ± 0.03 |
| <i>CML081C</i> | Hypothetical protein                                                                | 0.99 ± 0.04 |
| <i>CMD122C</i> | Hypothetical protein                                                                | 0.99 ± 0.04 |
| <i>CMS347C</i> | Probable mitotic spindle assembly checkpoint protein MAD2                           | 0.99 ± 0.05 |
| <i>CMS361C</i> | Organelle division protein FtsZ (AB032071)                                          | 0.99 ± 0.10 |
| <i>CMO256C</i> | Hypothetical protein                                                                | 0.99 ± 0.14 |
| <i>CMI162C</i> | Pyrophosphate-fructose-6-phosphate 1-phosphotransferase                             | 0.99 ± 0.07 |
| <i>CMC138C</i> | Similar to FUSCA protein FUS6                                                       | 0.99 ± 0.06 |
| <i>CML227C</i> | Hypothetical protein                                                                | 0.99 ± 0.08 |
| <i>CME117C</i> | ATP-binding cassette, sub-family D (PMP)                                            | 0.99 ± 0.07 |
| <i>CME040C</i> | Hypothetical protein                                                                | 0.99 ± 0.04 |
| <i>CMR350C</i> | Similar to CCAAT-binding transcription factor subunit A(CBF-A)                      | 0.99 ± 0.09 |
| <i>CMC008C</i> | NADH dehydrogenase I (Complex I) alpha subcomplex 7 (B14.5a)                        | 0.99 ± 0.04 |
| <i>CMA036C</i> | Similar to tubulin folding cofactor B                                               | 0.99 ± 0.03 |
| <i>CMA039C</i> | Hypothetical protein                                                                | 0.99 ± 0.01 |
| <i>CMO326C</i> | Hypothetical protein                                                                | 0.99 ± 0.07 |
| <i>CMF102C</i> | Similar to cell division cycle protein (CDC 16), TPR protein, APC6                  | 0.99 ± 0.06 |
| <i>CMS217C</i> | Hypothetical protein                                                                | 0.99 ± 0.05 |
| <i>CMQ350C</i> | Probable 1,4-benzoquinone reductase                                                 | 0.99 ± 0.15 |
| <i>CMT573C</i> | Hypothetical protein                                                                | 0.99 ± 0.02 |
| <i>CMH241C</i> | Hypothetical protein                                                                | 0.99 ± 0.06 |
| <i>CMH078C</i> | Hypothetical protein                                                                | 0.99 ± 0.02 |
| <i>CMG198C</i> | Methionyl-tRNA formyltransferase                                                    | 0.99 ± 0.03 |
| <i>CMG124C</i> | GTP-binding protein of Obg-family                                                   | 0.99 ± 0.15 |
| <i>CMC068C</i> | Hypothetical protein                                                                | 0.99 ± 0.03 |
| <i>CMP260C</i> | Pyruvate kinase I                                                                   | 0.99 ± 0.04 |
| <i>CMG056C</i> | DNA topoisomerase III alpha                                                         | 0.99 ± 0.02 |



|                |                                                                                                             |             |
|----------------|-------------------------------------------------------------------------------------------------------------|-------------|
| <i>CML329C</i> | 3-oxoacyl-[acyl-carrier-protein] synthase II                                                                | 0.99 ± 0.07 |
| <i>CMQ242C</i> | WD-repeat cell cycle regulatory protein                                                                     | 0.99 ± 0.09 |
| <i>CMR260C</i> | Similar to enhancer of rudimentaryp1 homolog                                                                | 0.99 ± 0.05 |
| <i>CMI230C</i> | Similar to endonuclease III                                                                                 | 0.99 ± 0.06 |
| <i>CML323C</i> | Ornithine aminotransferase                                                                                  | 0.99 ± 0.04 |
| <i>CMR093C</i> | Hypothetical protein                                                                                        | 0.99 ± 0.02 |
| <i>CMH126C</i> | Probable eukaryotic translation initiation factor 3, subunit 8                                              | 0.99 ± 0.08 |
| <i>CMS409C</i> | Similar to survival protein SurE                                                                            | 0.99 ± 0.07 |
| <i>CML224C</i> | Similar to flightless-I protein                                                                             | 0.99 ± 0.04 |
| <i>CMD097C</i> | Similar to Traf and Tnf receptor associated protein                                                         | 0.99 ± 0.03 |
| <i>CMQ137C</i> | Similar to chloroplast outer envelope protein Toc34                                                         | 0.99 ± 0.07 |
| <i>CMK265C</i> | Hypothetical protein                                                                                        | 0.99 ± 0.07 |
| <i>CMP282C</i> | Similar to ZIP Zinc transporter                                                                             | 0.99 ± 0.05 |
| <i>CMR070C</i> | SWI/SNF related, matrix associated, actin dependent regulator of chromatin, subfamily a-like                | 0.99 ± 0.07 |
| <i>CMH101C</i> | Hypothetical protein                                                                                        | 0.99 ± 0.05 |
| <i>CMP040C</i> | Hypothetical protein                                                                                        | 0.99 ± 0.10 |
| <i>CMH176C</i> | DNA polymerase alpha, subunit A                                                                             | 0.98 ± 0.04 |
| <i>CMT283C</i> | Hypothetical protein                                                                                        | 0.98 ± 0.06 |
| <i>CMS484C</i> | Similar to guanylate kinase (GMP kinase)                                                                    | 0.98 ± 0.06 |
| <i>CMR042C</i> | Similar to carbonyl reductase                                                                               | 0.98 ± 0.05 |
| <i>CMS082C</i> | Hypothetical protein                                                                                        | 0.98 ± 0.03 |
| <i>CMQ255C</i> | CAD complex (carbamoyl-phosphate synthase II/aspartate carbamoyltransferase catalytic chain/dihydroorotase) | 0.98 ± 0.05 |
| <i>CMH148C</i> | Hypothetical protein                                                                                        | 0.98 ± 0.07 |
| <i>CMS128C</i> | ATP-dependent Clp protease, ATP-binding subunit ClpB                                                        | 0.98 ± 0.04 |
| <i>CMM069C</i> | Hypothetical protein                                                                                        | 0.98 ± 0.06 |
| <i>CMP347C</i> | Similar to lipoic acid synthase                                                                             | 0.98 ± 0.10 |
| <i>CMS075C</i> | Hypothetical protein                                                                                        | 0.98 ± 0.05 |
| <i>CMQ068C</i> | Probable ubiquinone biosynthesis monooxygenase COQ6                                                         | 0.98 ± 0.04 |
| <i>CMS393C</i> | Chloroplast 3-oxoacyl-[acyl-carrier protein] reductase oreursor                                             | 0.98 ± 0.10 |
| <i>CMG130C</i> | Hypothetical protein                                                                                        | 0.98 ± 0.06 |
| <i>CMA056C</i> | Unknown kinase with aarF domain, fused with possible beta-lactamase                                         | 0.98 ± 0.13 |
| <i>CMB051C</i> | Mitochondrial translation elongation factor Ts (EF-Ts)                                                      | 0.98 ± 0.01 |
| <i>CMD025C</i> | DNA replication licensing factor MCM2                                                                       | 0.98 ± 0.14 |
| <i>CMO284C</i> | Probable 3-oxo-5-alpha-steroid 4-dehydrogenase                                                              | 0.98 ± 0.06 |
| <i>CMO030C</i> | Hypothetical protein                                                                                        | 0.98 ± 0.09 |
| <i>CMS192C</i> | Glutamate--tRNA ligase, chloroplast or mitochondrial                                                        | 0.98 ± 0.14 |
| <i>CMO092C</i> | DNA repair and recombination protein RAD26                                                                  | 0.98 ± 0.02 |
| <i>CMM029C</i> | Notchless                                                                                                   | 0.98 ± 0.10 |
| <i>CMO141C</i> | Probable adrenodoxin                                                                                        | 0.98 ± 0.07 |
| <i>CMG145C</i> | Hypothetical protein                                                                                        | 0.98 ± 0.10 |
| <i>CMD140C</i> | 60S ribosomal protein L27A                                                                                  | 0.98 ± 0.08 |
| <i>CMK082C</i> | Hypothetical protein                                                                                        | 0.98 ± 0.20 |
| <i>CMB101C</i> | Hypothetical protein                                                                                        | 0.98 ± 0.08 |

|                |                                                                        |             |
|----------------|------------------------------------------------------------------------|-------------|
| <i>CMQ107C</i> | Hypothetical protein                                                   | 0.98 ± 0.30 |
| <i>CMQ124C</i> | Hypothetical protein                                                   | 0.98 ± 0.05 |
| <i>CMD012C</i> | Hypothetical protein                                                   | 0.98 ± 0.04 |
| <i>CMT399C</i> | Hypothetical protein                                                   | 0.98 ± 0.07 |
| <i>CMP295C</i> | Similar to iron-sulfur cluster scaffold protein                        | 0.98 ± 0.05 |
| <i>CMO005C</i> | Hypothetical protein                                                   | 0.98 ± 0.01 |
| <i>CML072C</i> | Hypothetical protein                                                   | 0.98 ± 0.07 |
| <i>CMN061C</i> | Hypothetical protein                                                   | 0.98 ± 0.04 |
| <i>CMK051C</i> | Similar to frataxin                                                    | 0.98 ± 0.08 |
| <i>CMF176C</i> | Similar to lysophospholipase II                                        | 0.98 ± 0.05 |
| <i>CMR126C</i> | Probable sulfite oxidase                                               | 0.98 ± 0.08 |
| <i>CMP110C</i> | Similar to retinol dehydrogenase 8 (all-trans)                         | 0.98 ± 0.16 |
| <i>CME176C</i> | Hypothetical protein                                                   | 0.98 ± 0.05 |
| <i>CMO105C</i> | Unknown ABC transporter                                                | 0.98 ± 0.04 |
| <i>CMS141C</i> | Hypothetical protein                                                   | 0.98 ± 0.05 |
| <i>CMO266C</i> | Hypothetical protein                                                   | 0.98 ± 0.01 |
| <i>CMD041C</i> | Fructose-1,6-bisphosphatase                                            | 0.98 ± 0.10 |
| <i>CME192C</i> | Uridine kinase                                                         | 0.98 ± 0.04 |
| <i>CMO316C</i> | Hypothetical protein                                                   | 0.98 ± 0.08 |
| <i>CML023C</i> | Transitional endoplasmic reticulum ATPase (valosin-containing protein) | 0.98 ± 0.07 |
| <i>CMP070C</i> | Stress-inducible pyridoxine biosynthesis protein SOR                   | 0.98 ± 0.15 |
| <i>CMJ183C</i> | Mitochondrial ribosomal protein L33, precursor                         | 0.98 ± 0.13 |
| <i>CMK309C</i> | Unknown zinc-finger protein                                            | 0.98 ± 0.12 |
| <i>CMB055C</i> | Similar to uroporphyrin-III C-methyltransferase                        | 0.98 ± 0.04 |
| <i>CMN143C</i> | Similar to t-SNARE SED5                                                | 0.98 ± 0.11 |
| <i>CMQ316C</i> | Exonuclease                                                            | 0.98 ± 0.14 |
| <i>CMT548C</i> | Hypothetical protein                                                   | 0.98 ± 0.06 |
| <i>CMP016C</i> | Hypothetical protein                                                   | 0.98 ± 0.12 |
| <i>CMK073C</i> | Probable transcription factor Hap5a                                    | 0.98 ± 0.09 |
| <i>CMS206C</i> | Hypothetical protein                                                   | 0.98 ± 0.12 |
| <i>CMP173C</i> | Similar to protein-S-isoprenylcysteine O-methyltransferase             | 0.98 ± 0.11 |
| <i>CMB106C</i> | Hypothetical protein                                                   | 0.98 ± 0.04 |
| <i>CMH201C</i> | Hypothetical protein                                                   | 0.98 ± 0.08 |
| <i>CML147C</i> | Hypothetical protein                                                   | 0.98 ± 0.06 |
| <i>CMH252C</i> | Hypothetical protein                                                   | 0.98 ± 0.09 |
| <i>CMM051C</i> | Hypothetical protein                                                   | 0.98 ± 0.20 |
| <i>CMO285C</i> | Hypothetical protein                                                   | 0.98 ± 0.09 |
| <i>CML280C</i> | Hypothetical protein                                                   | 0.98 ± 0.07 |
| <i>CMR382C</i> | Similar to sodium/hydrogen antiporter                                  | 0.98 ± 0.04 |
| <i>CMT080C</i> | Hypothetical protein                                                   | 0.98 ± 0.11 |
| <i>CME012C</i> | Na <sup>+</sup> /glucose co-transporter                                | 0.98 ± 0.02 |
| <i>CMP246C</i> | Hypothetical protein                                                   | 0.98 ± 0.06 |
| <i>CMH048C</i> | Hypothetical protein                                                   | 0.98 ± 0.04 |

|                |                                                                          |             |
|----------------|--------------------------------------------------------------------------|-------------|
| <i>CMI015C</i> | L-asparaginase                                                           | 0.97 ± 0.11 |
| <i>CMM318C</i> | Glutamyl-tRNA amidotransferase subunit A                                 | 0.97 ± 0.15 |
| <i>CMS053C</i> | Hypothetical protein                                                     | 0.97 ± 0.04 |
| <i>CMD091C</i> | Hypothetical protein                                                     | 0.97 ± 0.10 |
| <i>CMI197C</i> | Hypothetical protein                                                     | 0.97 ± 0.15 |
| <i>CMC134C</i> | Probable constituent of 66S pre-ribosomal particles Nsa2p                | 0.97 ± 0.14 |
| <i>CMG154C</i> | Hypothetical protein                                                     | 0.97 ± 0.05 |
| <i>CMT481C</i> | Similar to p53-related protein kinase                                    | 0.97 ± 0.07 |
| <i>CMD014C</i> | Coatomer protein complex, subunit epsilon                                | 0.97 ± 0.07 |
| <i>CMK020C</i> | Similar to glycogenin                                                    | 0.97 ± 0.09 |
| <i>CMT338C</i> | Hypothetical protein                                                     | 0.97 ± 0.06 |
| <i>CMQ337C</i> | 2-isopropylmalate synthase                                               | 0.97 ± 0.04 |
| <i>CMJ210C</i> | Similar to tRNA dihydrouridine synthase Dus1p                            | 0.97 ± 0.05 |
| <i>CME047C</i> | Isoleucine--tRNA ligase                                                  | 0.97 ± 0.07 |
| <i>CML214C</i> | Ornithine carbamoyltransferase                                           | 0.97 ± 0.06 |
| <i>CMA077C</i> | Aspartate transaminase                                                   | 0.97 ± 0.09 |
| <i>CMS138C</i> | Hypothetical protein                                                     | 0.97 ± 0.07 |
| <i>CMQ325C</i> | Hypothetical protein                                                     | 0.97 ± 0.07 |
| <i>CMF038C</i> | Similar to sedlin                                                        | 0.97 ± 0.02 |
| <i>CMK294C</i> | 26S proteasome ATP-dependent regulatory subunit                          | 0.97 ± 0.04 |
| <i>CMT528C</i> | Hypothetical protein                                                     | 0.97 ± 0.05 |
| <i>CMK029C</i> | Similar to GTPase activating protein                                     | 0.97 ± 0.04 |
| <i>CMT610C</i> | Methylenetetrahydrofolate reductase                                      | 0.97 ± 0.05 |
| <i>CMB095C</i> | Similar to alpha-glucosidase                                             | 0.97 ± 0.08 |
| <i>CMS097C</i> | Hypothetical protein                                                     | 0.97 ± 0.08 |
| <i>CMS297C</i> | Similar to cleavage and polyadenylation specificity factor subunit       | 0.97 ± 0.07 |
| <i>CMT232C</i> | Protoheme IX farnesyltransferase (Complex IV)                            | 0.97 ± 0.05 |
| <i>CMQ042C</i> | UDP-glnac:dolichol phosphate N-acetylglucosamine-1-phosphate transferase | 0.97 ± 0.09 |
| <i>CMO313C</i> | DNA primase small subunit                                                | 0.97 ± 0.03 |
| <i>CMT491C</i> | Similar to thylakoidal sec-independent protein transporter Tha4          | 0.97 ± 0.08 |
| <i>CMT570C</i> | Hypothetical protein                                                     | 0.97 ± 0.07 |
| <i>CMJ284C</i> | Cytochrome p450                                                          | 0.97 ± 0.03 |
| <i>CMR216C</i> | Hypothetical protein                                                     | 0.97 ± 0.06 |
| <i>CMP225C</i> | Probable ATPase                                                          | 0.97 ± 0.02 |
| <i>CMS169C</i> | Probable dolichyl-phosphate mannosyltransferase                          | 0.97 ± 0.03 |
| <i>CMS286C</i> | Cytochrome-b5 reductase                                                  | 0.97 ± 0.13 |
| <i>CMH137C</i> | Similar to pyrroline-5-carboxylate reductase                             | 0.97 ± 0.04 |
| <i>CMP008C</i> | RNA polymerase II subunit                                                | 0.97 ± 0.02 |
| <i>CMS108C</i> | Immunophilin                                                             | 0.97 ± 0.03 |
| <i>CMT536C</i> | Similar to cation transport protein                                      | 0.97 ± 0.06 |
| <i>CMI260C</i> | Hypothetical protein                                                     | 0.97 ± 0.05 |
| <i>CMK102C</i> | Hypothetical protein                                                     | 0.97 ± 0.05 |
| <i>CMA090C</i> | NADH dehydrogenase I (Complex I) alpha subcomplex 8 (PGIV)               | 0.97 ± 0.01 |

|                |                                                                    |             |
|----------------|--------------------------------------------------------------------|-------------|
| <i>CMC160C</i> | Mitochondrial peptide chain release factor RF-2                    | 0.97 ± 0.02 |
| <i>CMG109C</i> | 40S ribosomal protein S15                                          | 0.97 ± 0.02 |
| <i>CMM297C</i> | Hypothetical protein                                               | 0.97 ± 0.04 |
| <i>CMT469C</i> | Probable tyrosyl-DNA phosphodiesterase                             | 0.97 ± 0.06 |
| <i>CMR018C</i> | Phosphatidylinositol 3-kinase                                      | 0.97 ± 0.05 |
| <i>CML305C</i> | 60S ribosomal protein L27                                          | 0.97 ± 0.18 |
| <i>CMK069C</i> | Diacylglycerol kinase                                              | 0.97 ± 0.01 |
| <i>CMQ381C</i> | Hypothetical protein                                               | 0.97 ± 0.09 |
| <i>CMB007C</i> | Hypothetical protein                                               | 0.97 ± 0.02 |
| <i>CME067C</i> | Exonuclease I                                                      | 0.97 ± 0.18 |
| <i>CMN206C</i> | Hypothetical protein                                               | 0.97 ± 0.08 |
| <i>CMS048C</i> | Hypothetical protein                                               | 0.97 ± 0.08 |
| <i>CMS334C</i> | Similar to regulator of nonsense transcripts                       | 0.97 ± 0.06 |
| <i>CML339C</i> | Steroid monooxygenase                                              | 0.97 ± 0.08 |
| <i>CMK122C</i> | Hypothetical protein                                               | 0.97 ± 0.03 |
| <i>CMR404C</i> | Cytochrome c oxidase (Complex IV) subunit VIb                      | 0.97 ± 0.12 |
| <i>CMI034C</i> | Ubiquitin-activating enzyme E1                                     | 0.97 ± 0.05 |
| <i>CMR354C</i> | Hypothetical protein                                               | 0.97 ± 0.09 |
| <i>CMR139C</i> | Hypothetical protein                                               | 0.97 ± 0.11 |
| <i>CMJ182C</i> | Hypothetical protein                                               | 0.97 ± 0.05 |
| <i>CMS271C</i> | Similar to thioredoxin                                             | 0.97 ± 0.12 |
| <i>CMI264C</i> | ATP-binding cassette, sub-family F (GCN), member 2                 | 0.97 ± 0.07 |
| <i>CMT489C</i> | Hypothetical protein                                               | 0.97 ± 0.02 |
| <i>CMR445C</i> | Oxygen independent coprophorphyrinogen III oxidase                 | 0.97 ± 0.08 |
| <i>CMN320C</i> | NADH dehydrogenase I (Complex I) iron-sulfur protein 13kDa subunit | 0.97 ± 0.04 |
| <i>CMO093C</i> | Hypothetical protein                                               | 0.97 ± 0.05 |
| <i>CMI196C</i> | Sedoheptulose-1,7-bisphosphatase                                   | 0.97 ± 0.10 |
| <i>CMC030C</i> | Hypothetical protein                                               | 0.97 ± 0.08 |
| <i>CMD162C</i> | Similar to DnaJ protein                                            | 0.97 ± 0.05 |
| <i>CMR262C</i> | Similar to conserved oligomeric Golgi complex component COG2       | 0.97 ± 0.12 |
| <i>CMJ262C</i> | Hypothetical protein                                               | 0.97 ± 0.08 |
| <i>CMT254C</i> | Hypothetical protein                                               | 0.97 ± 0.04 |
| <i>CMJ269C</i> | Similar to calcineurin B subunit                                   | 0.97 ± 0.08 |
| <i>CMR155C</i> | Similar to TATA element modulatory factor                          | 0.97 ± 0.03 |
| <i>CMT223C</i> | Similar to translation initiation factor IF-3                      | 0.97 ± 0.12 |
| <i>CMC105C</i> | Similar to angio-associated migratory cell protein                 | 0.97 ± 0.09 |
| <i>CMQ465C</i> | Similar to senescence-associated protein Din1                      | 0.97 ± 0.18 |
| <i>CMT628C</i> | Hypothetical protein                                               | 0.96 ± 0.12 |
| <i>CMO258C</i> | Hypothetical protein                                               | 0.96 ± 0.07 |
| <i>CMS035C</i> | Ferrochelataase                                                    | 0.96 ± 0.07 |
| <i>CMG052C</i> | MYB-related protein                                                | 0.96 ± 0.13 |
| <i>CMK040C</i> | Unknown TatD related DNase                                         | 0.96 ± 0.12 |
| <i>CMN295C</i> | ATP-binding cassette, sub-family G (WBC)                           | 0.96 ± 0.13 |

|                |                                                                                  |             |
|----------------|----------------------------------------------------------------------------------|-------------|
| <i>CMQ208C</i> | Similar to endoplasmic reticulum translocon component SEC63                      | 0.96 ± 0.10 |
| <i>CMC182C</i> | Hypothetical protein                                                             | 0.96 ± 0.05 |
| <i>CMS255C</i> | Similar to proteasome 26S subunit, non-ATPase, 10                                | 0.96 ± 0.07 |
| <i>CMM185C</i> | Similar to protein phosphatase 1, regulatory subunit                             | 0.96 ± 0.03 |
| <i>CMT523C</i> | Hypothetical protein                                                             | 0.96 ± 0.08 |
| <i>CMB038C</i> | Hypothetical protein                                                             | 0.96 ± 0.11 |
| <i>CMO298C</i> | Hypothetical protein                                                             | 0.96 ± 0.05 |
| <i>CMO221C</i> | Hypothetical protein                                                             | 0.96 ± 0.03 |
| <i>CMT078C</i> | Probable glutamate carboxypeptidase II                                           | 0.96 ± 0.04 |
| <i>CMQ226C</i> | Similar to sodium-dependent transporter                                          | 0.96 ± 0.15 |
| <i>CMQ420C</i> | Hypothetical protein                                                             | 0.96 ± 0.09 |
| <i>CMS449C</i> | Similar to molybdopterin biosynthesis CNX1 protein                               | 0.96 ± 0.09 |
| <i>CMB061C</i> | Hypothetical protein                                                             | 0.96 ± 0.06 |
| <i>CMC018C</i> | Similar to vesicle-associated membrane protein 7                                 | 0.96 ± 0.06 |
| <i>CMR098C</i> | Cell division control protein 5 (Cdc5)                                           | 0.96 ± 0.05 |
| <i>CMI276C</i> | Probable SAC1 (supressor of actin mutations 1) protein                           | 0.96 ± 0.07 |
| <i>CMH120C</i> | Hypothetical protein                                                             | 0.96 ± 0.04 |
| <i>CMT247C</i> | Hypothetical protein                                                             | 0.96 ± 0.03 |
| <i>CMR475C</i> | Probable inositol 2-dehydrogenase                                                | 0.96 ± 0.09 |
| <i>CMS167C</i> | Similar to N2,N2-dimethylguanosine tRNA methyltransferase                        | 0.96 ± 0.03 |
| <i>CMT106C</i> | Hypothetical protein                                                             | 0.96 ± 0.05 |
| <i>CMS391C</i> | Similar to leucine-rich repeat-containing G protein-coupled receptor             | 0.96 ± 0.03 |
| <i>CMH110C</i> | Hypothetical protein                                                             | 0.96 ± 0.10 |
| <i>CMA109C</i> | Hypothetical protein                                                             | 0.96 ± 0.08 |
| <i>CMM119C</i> | Glutamate dehydrogenase (NADP <sup>+</sup> ) 2                                   | 0.96 ± 0.05 |
| <i>CMN128C</i> | Hypothetical protein                                                             | 0.96 ± 0.10 |
| <i>CMM155C</i> | Probable pyridoxine 5'-phosphate oxidase                                         | 0.96 ± 0.03 |
| <i>CMO069C</i> | Hypothetical protein                                                             | 0.96 ± 0.02 |
| <i>CMO048C</i> | Hypothetical protein                                                             | 0.96 ± 0.06 |
| <i>CMB119C</i> | Similar to cell division control protein 48, AAA family (cdc48-1)                | 0.96 ± 0.05 |
| <i>CMT037C</i> | Similar to thioredoxin-like protein                                              | 0.96 ± 0.04 |
| <i>CMS388C</i> | Hypothetical protein                                                             | 0.96 ± 0.04 |
| <i>CMN158C</i> | Chloroplast ribosomal protein S15 precursor                                      | 0.96 ± 0.15 |
| <i>CMJ225C</i> | Probable dipeptidyl aminopeptidase                                               | 0.96 ± 0.06 |
| <i>CMO355C</i> | Guanine nucleotide exchange factor                                               | 0.96 ± 0.04 |
| <i>CMR470C</i> | Similar to adaptor-related protein complex 3, beta subunit                       | 0.96 ± 0.03 |
| <i>CMJ055C</i> | 2-oxoglutarate dehydrogenase E2 component (dihydrolipoamide succinyltransferase) | 0.96 ± 0.04 |
| <i>CMJ121C</i> | Hypothetical protein                                                             | 0.96 ± 0.06 |
| <i>CMG116C</i> | Hypothetical protein                                                             | 0.96 ± 0.05 |
| <i>CMT207C</i> | Chaperonin containing TCP1, subunit 1 (alpha)                                    | 0.96 ± 0.12 |
| <i>CMR471C</i> | Hypothetical protein                                                             | 0.96 ± 0.06 |
| <i>CMS448C</i> | Hypothetical protein                                                             | 0.96 ± 0.06 |
| <i>CMS195C</i> | 6-phosphogluconate dehydrogenase, decarboxylating                                | 0.96 ± 0.18 |

|                |                                                                                                |             |
|----------------|------------------------------------------------------------------------------------------------|-------------|
| <i>CMF081C</i> | Hypothetical protein                                                                           | 0.96 ± 0.04 |
| <i>CMQ200C</i> | NADH dehydrogenase I (Complex I) iron-sulfur protein 30kDa subunit (NADH-coenzyme Q reductase) | 0.96 ± 0.05 |
| <i>CME088C</i> | Hypothetical protein                                                                           | 0.96 ± 0.09 |
| <i>CMA008C</i> | ORF1050                                                                                        | 0.96 ± 0.02 |
| <i>CMJ154C</i> | Geranylgeranyl hydrogenase                                                                     | 0.96 ± 0.03 |
| <i>CMS261C</i> | Hypothetical protein                                                                           | 0.96 ± 0.09 |
| <i>CML249C</i> | Probable 8-oxoguanine-DNA-glycosylase                                                          | 0.96 ± 0.04 |
| <i>CMQ345C</i> | GTP-binding protein of Nug1 family                                                             | 0.96 ± 0.06 |
| <i>CMT251C</i> | Similar to light-inducible protein ATLS1-like                                                  | 0.96 ± 0.15 |
| <i>CML218C</i> | Similar to N-terminal acetyltransferase complex ARD1 subunit                                   | 0.96 ± 0.03 |
| <i>CML332C</i> | Protein phosphatase 2a                                                                         | 0.96 ± 0.05 |
| <i>CMO233C</i> | Hypothetical protein                                                                           | 0.96 ± 0.18 |
| <i>CMP228C</i> | Hypothetical protein                                                                           | 0.96 ± 0.06 |
| <i>CML130C</i> | Similar to transcription initiation factor TFIIE beta subunit                                  | 0.96 ± 0.06 |
| <i>CMC082C</i> | CCAAT-box-binding transcription factor                                                         | 0.96 ± 0.03 |
| <i>CMR075C</i> | Probable nucleotide sugar epimerase                                                            | 0.96 ± 0.02 |
| <i>CMM226C</i> | Hypothetical protein                                                                           | 0.96 ± 0.09 |
| <i>CMO263C</i> | Hypothetical protein                                                                           | 0.96 ± 0.15 |
| <i>CMT518C</i> | Similar to tetrapyrrole methylase                                                              | 0.96 ± 0.07 |
| <i>CME083C</i> | Similar to retromer component VPS5                                                             | 0.96 ± 0.05 |
| <i>CMR314C</i> | Hypothetical protein                                                                           | 0.96 ± 0.05 |
| <i>CMK278C</i> | Probable protein disulfide isomerase                                                           | 0.96 ± 0.07 |
| <i>CMM067C</i> | Hypothetical protein                                                                           | 0.96 ± 0.08 |
| <i>CMN276C</i> | Hypothetical protein                                                                           | 0.96 ± 0.15 |
| <i>CMN029C</i> | Hypothetical protein                                                                           | 0.96 ± 0.01 |
| <i>CMM153C</i> | Similar to mitochondrial RNA splicing protein Mrs2p                                            | 0.96 ± 0.02 |
| <i>CMO139C</i> | 2-amino-3-ketobutyrate CoA ligase (akb ligase) (glycine acetyltransferase)                     | 0.96 ± 0.03 |
| <i>CMF120C</i> | Hypothetical protein                                                                           | 0.96 ± 0.09 |
| <i>CMG035C</i> | Probable Ran GTPase activating protein                                                         | 0.96 ± 0.05 |
| <i>CMO068C</i> | Similar to glycolipid transfer protein                                                         | 0.95 ± 0.07 |
| <i>CMA050C</i> | Hypothetical protein                                                                           | 0.95 ± 0.01 |
| <i>CMF072C</i> | Glutamate decarboxylase                                                                        | 0.95 ± 0.11 |
| <i>CMG054C</i> | Hypothetical protein                                                                           | 0.95 ± 0.04 |
| <i>CMN302C</i> | Similar to Sm protein D2                                                                       | 0.95 ± 0.13 |
| <i>CMQ030C</i> | Galactose-1-phosphate uridylyltransferase                                                      | 0.95 ± 0.11 |
| <i>CMN041C</i> | Hypothetical protein                                                                           | 0.95 ± 0.04 |
| <i>CMB070C</i> | Ubiquitin protein ligase E3A                                                                   | 0.95 ± 0.07 |
| <i>CMT543C</i> | Similar to rRNA methylase                                                                      | 0.95 ± 0.04 |
| <i>CMT460C</i> | Similar to RAB geranylgeranyl transferase alpha subunit                                        | 0.95 ± 0.01 |
| <i>CMT090C</i> | Probable vacuolar protein-sorting protein VPS45                                                | 0.95 ± 0.05 |
| <i>CMT157C</i> | Small GTP-binding protein of Sar1/Arf family                                                   | 0.95 ± 0.10 |
| <i>CMR392C</i> | Probable heterogeneous nuclear RNP protein A                                                   | 0.95 ± 0.05 |
| <i>CMI284C</i> | Hypothetical protein                                                                           | 0.95 ± 0.10 |

|                |                                                                              |             |
|----------------|------------------------------------------------------------------------------|-------------|
| <i>CMH010C</i> | Similar to syntaxin protein                                                  | 0.95 ± 0.04 |
| <i>CMF015C</i> | Small GTP-binding protein of Sar1/Arf family                                 | 0.95 ± 0.08 |
| <i>CMO276C</i> | Glucokinase                                                                  | 0.95 ± 0.06 |
| <i>CMM261C</i> | Cation-transporting ATPase                                                   | 0.95 ± 0.05 |
| <i>CMD185C</i> | TATA-box binding protein-associated factor 13                                | 0.95 ± 0.13 |
| <i>CML314C</i> | Similar to RING zinc finger protein                                          | 0.95 ± 0.06 |
| <i>CMR315C</i> | CP12 protein, chloroplast precursor                                          | 0.95 ± 0.09 |
| <i>CML282C</i> | Hypothetical protein                                                         | 0.95 ± 0.05 |
| <i>CML304C</i> | 60S ribosomal protein L35A                                                   | 0.95 ± 0.05 |
| <i>CMN148C</i> | 40S ribosomal protein S3                                                     | 0.95 ± 0.05 |
| <i>CMJ242C</i> | Hypothetical protein                                                         | 0.95 ± 0.01 |
| <i>CMM273C</i> | Similar to alkane hydroxylase                                                | 0.95 ± 0.23 |
| <i>CMT514C</i> | Hypothetical protein                                                         | 0.95 ± 0.07 |
| <i>CME141C</i> | Similar to GTP-binding protein                                               | 0.95 ± 0.03 |
| <i>CMR064C</i> | Hypothetical protein                                                         | 0.95 ± 0.08 |
| <i>CMQ261C</i> | Hypothetical protein                                                         | 0.95 ± 0.07 |
| <i>CMO334C</i> | Similar to nucleolar RNA-binding protein                                     | 0.95 ± 0.23 |
| <i>CMI301C</i> | Similar to glycosyl transferase                                              | 0.95 ± 0.07 |
| <i>CMD049C</i> | Hypothetical protein                                                         | 0.95 ± 0.09 |
| <i>CML277C</i> | Similar to heat shock transcription factor                                   | 0.95 ± 0.01 |
| <i>CMO097C</i> | Imidazole glycerol phosphate synthase subunit (IGP synthase cyclase subunit) | 0.95 ± 0.08 |
| <i>CMJ146C</i> | Hypothetical protein                                                         | 0.95 ± 0.06 |
| <i>CML259C</i> | Eukaryotic polypeptide chain release factor 3                                | 0.95 ± 0.05 |
| <i>CMH105C</i> | Hypothetical protein                                                         | 0.95 ± 0.03 |
| <i>CMD095C</i> | V-type ATPase V0 subunit a                                                   | 0.95 ± 0.08 |
| <i>CMB079C</i> | MYB-related protein                                                          | 0.95 ± 0.08 |
| <i>CMM024C</i> | Similar to nuclear protein UKp68                                             | 0.95 ± 0.11 |
| <i>CMA105C</i> | Hypothetical protein                                                         | 0.95 ± 0.07 |
| <i>CMA075C</i> | Similar to quaking protein                                                   | 0.95 ± 0.05 |
| <i>CML054C</i> | Hypothetical protein                                                         | 0.95 ± 0.06 |
| <i>CMT560C</i> | Probable delta(24)-sterol C-methyltransferase                                | 0.95 ± 0.04 |
| <i>CMQ254C</i> | Hypothetical protein                                                         | 0.95 ± 0.07 |
| <i>CMM038C</i> | Hypothetical protein                                                         | 0.95 ± 0.05 |
| <i>CMT620C</i> | Hypothetical protein                                                         | 0.95 ± 0.04 |
| <i>CMH276C</i> | Hypothetical protein                                                         | 0.95 ± 0.02 |
| <i>CMS330C</i> | Probable metal-transporting ATPase                                           | 0.95 ± 0.05 |
| <i>CMJ226C</i> | Probable mRNA-decapping enzyme DCP2                                          | 0.95 ± 0.10 |
| <i>CMN266C</i> | Hypothetical protein                                                         | 0.95 ± 0.04 |
| <i>CME073C</i> | ATP-dependent RNA helicase p47                                               | 0.95 ± 0.03 |
| <i>CMS245C</i> | Phosphoribosylformimino-5-aminoimidazole carboxamide ribotide isomerase      | 0.95 ± 0.03 |
| <i>CMM299C</i> | Dihydrolipoamide dehydrogenase                                               | 0.95 ± 0.06 |
| <i>CML076C</i> | 3-methyl-2-oxobutanoate hydroxymethyltransferase                             | 0.95 ± 0.09 |
| <i>CMK132C</i> | Probable transcription initiation factor TFIID, subunit TAF10                | 0.95 ± 0.07 |

|                |                                                                              |             |
|----------------|------------------------------------------------------------------------------|-------------|
| <i>CMA053C</i> | Hypothetical protein                                                         | 0.95 ± 0.01 |
| <i>CML261C</i> | Hypothetical protein                                                         | 0.95 ± 0.03 |
| <i>CMS395C</i> | Probable electron transport flavoprotein                                     | 0.95 ± 0.06 |
| <i>CMJ049C</i> | Hypothetical protein                                                         | 0.95 ± 0.05 |
| <i>CMN146C</i> | Hypothetical protein                                                         | 0.95 ± 0.02 |
| <i>CMG165C</i> | Probable NOL1/NOP2/sun family protein (proliferating-cell nucleolar protein) | 0.95 ± 0.07 |
| <i>CMR254C</i> | Cytidine deaminase                                                           | 0.95 ± 0.03 |
| <i>CMF089C</i> | 1-deoxyxylulose-5-phosphate synthase                                         | 0.95 ± 0.05 |
| <i>CMJ144C</i> | Hypothetical protein                                                         | 0.95 ± 0.06 |
| <i>CMQ071C</i> | Probable U3 snoRNP component Imp4p                                           | 0.95 ± 0.11 |
| <i>CMI302C</i> | Hypothetical protein                                                         | 0.95 ± 0.06 |
| <i>CMI273C</i> | Dihydrolipoamide S-acetyltransferase, precursor                              | 0.95 ± 0.08 |
| <i>CMT191C</i> | Hypothetical protein                                                         | 0.95 ± 0.07 |
| <i>CMK079C</i> | Unknown zinc-finger protein                                                  | 0.95 ± 0.09 |
| <i>CMA033C</i> | Hypothetical protein                                                         | 0.95 ± 0.03 |
| <i>CMD151C</i> | Similar to transcription initiation protein SPT5                             | 0.95 ± 0.11 |
| <i>CMC135C</i> | Hypothetical protein                                                         | 0.95 ± 0.03 |
| <i>CMP047C</i> | Hypothetical protein                                                         | 0.95 ± 0.15 |
| <i>CMM086C</i> | Hypothetical protein                                                         | 0.95 ± 0.04 |
| <i>CMS099C</i> | Hypothetical protein                                                         | 0.95 ± 0.12 |
| <i>CMG137C</i> | Hypothetical protein                                                         | 0.95 ± 0.05 |
| <i>CMR257C</i> | Hypothetical protein                                                         | 0.95 ± 0.03 |
| <i>CMM224C</i> | Hypothetical protein                                                         | 0.95 ± 0.09 |
| <i>CMI169C</i> | Probable DNA mismatch repair protein                                         | 0.95 ± 0.12 |
| <i>CMC103C</i> | Hypothetical protein                                                         | 0.95 ± 0.05 |
| <i>CMO094C</i> | 3-isopropylmalate dehydratase small subunit                                  | 0.95 ± 0.10 |
| <i>CMA030C</i> | Pyruvate kinase, chloroplast precursor                                       | 0.95 ± 0.25 |
| <i>CMQ131C</i> | Hypothetical protein                                                         | 0.95 ± 0.05 |
| <i>CMQ051C</i> | 40S ribosomal protein S21                                                    | 0.95 ± 0.05 |
| <i>CMN144C</i> | Similar to lysyl oxidase                                                     | 0.95 ± 0.07 |
| <i>CMK109C</i> | Hypothetical protein                                                         | 0.95 ± 0.03 |
| <i>CML255C</i> | Similar to inositolphosphorylceramide synthase                               | 0.95 ± 0.13 |
| <i>CMO086C</i> | Similar to microsomal signal peptidase                                       | 0.95 ± 0.02 |
| <i>CMJ173C</i> | Glycerol kinase                                                              | 0.95 ± 0.08 |
| <i>CMH255C</i> | Similar to inositol-1(or 4)-monophosphatase                                  | 0.95 ± 0.03 |
| <i>CMM157C</i> | Similar to pterin-4-alpha-carbinolamine dehydratase                          | 0.95 ± 0.07 |
| <i>CMA081C</i> | Similar to protein kinase (AKINbetagamma-2 of maize)                         | 0.95 ± 0.07 |
| <i>CMB086C</i> | Hypothetical protein                                                         | 0.95 ± 0.02 |
| <i>CMF069C</i> | Condensin complex subunit 2                                                  | 0.95 ± 0.02 |
| <i>CMS093C</i> | Hypothetical protein                                                         | 0.94 ± 0.03 |
| <i>CMT315C</i> | Probable oligoribonuclease, mitochondrial precursor                          | 0.94 ± 0.10 |
| <i>CMM267C</i> | NADH dehydrogenase I (Complex I) alpha subcomplex 9, mitochondrial precursor | 0.94 ± 0.05 |
| <i>CMH046C</i> | 40S ribosomal protein S14                                                    | 0.94 ± 0.09 |



|                |                                                                  |             |
|----------------|------------------------------------------------------------------|-------------|
| <i>CMK301C</i> | Hypothetical protein                                             | 0.94 ± 0.05 |
| <i>CMT104C</i> | Probable tryptophan 2,3-dioxygenase                              | 0.94 ± 0.12 |
| <i>CMT414C</i> | Monodehydroascorbate reductase                                   | 0.94 ± 0.05 |
| <i>CMH039C</i> | Similar to PREG1-like negative regulator                         | 0.94 ± 0.18 |
| <i>CMB035C</i> | Probable Double-strand break repair protein MRE11                | 0.94 ± 0.04 |
| <i>CMK119C</i> | Hypothetical protein                                             | 0.94 ± 0.05 |
| <i>CMG212C</i> | Similar to iron transporter ferroportin 1                        | 0.94 ± 0.08 |
| <i>CMO317C</i> | Similar to carboxyphosphoenolpyruvate mutase                     | 0.94 ± 0.06 |
| <i>CMO108C</i> | Hypothetical protein                                             | 0.94 ± 0.08 |
| <i>CMK235C</i> | DNA ligase I                                                     | 0.94 ± 0.05 |
| <i>CMQ023C</i> | Similar to lipoate-protein ligase A                              | 0.94 ± 0.15 |
| <i>CMA078C</i> | Hypothetical protein                                             | 0.94 ± 0.04 |
| <i>CMD181C</i> | Similar to RNA polymerase III transcription factor IIIB chain B" | 0.94 ± 0.08 |
| <i>CML293C</i> | Probable chaperone protein DnaJ                                  | 0.94 ± 0.06 |
| <i>CMK071C</i> | Hypothetical protein                                             | 0.94 ± 0.09 |
| <i>CMS445C</i> | Hypothetical protein                                             | 0.94 ± 0.02 |
| <i>CMB054C</i> | Hypothetical protein                                             | 0.94 ± 0.05 |
| <i>CML223C</i> | GDP dissociation inhibitor                                       | 0.94 ± 0.05 |
| <i>CMH013C</i> | Hypothetical protein                                             | 0.94 ± 0.04 |
| <i>CMJ129C</i> | Histone deacetylase                                              | 0.94 ± 0.05 |
| <i>CMK182C</i> | Serine/arginine-rich protein specific kinase                     | 0.94 ± 0.08 |
| <i>CMF088C</i> | Hypothetical protein                                             | 0.94 ± 0.07 |
| <i>CMO300C</i> | Cyclophilin                                                      | 0.94 ± 0.02 |
| <i>CME110C</i> | Hypothetical protein                                             | 0.94 ± 0.02 |
| <i>CME127C</i> | Similar to fructose 1,6-bisphosphatase                           | 0.94 ± 0.05 |
| <i>CME113C</i> | Probable dolichol-phosphate mannosyltransferase                  | 0.94 ± 0.09 |
| <i>CMT096C</i> | Nuclear transport factor importin alpha                          | 0.94 ± 0.04 |
| <i>CMG206C</i> | Hypothetical protein                                             | 0.94 ± 0.16 |
| <i>CMH016C</i> | Similar to thiamin pyrophosphokinase                             | 0.94 ± 0.10 |
| <i>CMO331C</i> | Probable cohesin subunit SA                                      | 0.94 ± 0.04 |
| <i>CMM308C</i> | Hypothetical protein                                             | 0.94 ± 0.12 |
| <i>CMQ354C</i> | Phenylalanine--tRNA ligase, mt?                                  | 0.94 ± 0.19 |
| <i>CMK022C</i> | Similar to Sm protein B                                          | 0.94 ± 0.02 |
| <i>CMG014C</i> | Similar to G10 protein                                           | 0.94 ± 0.06 |
| <i>CMT050C</i> | Unknown transporter                                              | 0.94 ± 0.04 |
| <i>CMR408C</i> | Hypothetical protein                                             | 0.94 ± 0.06 |
| <i>CMQ219C</i> | Probable tRNA/rRNA cytosine-C5-methylase                         | 0.94 ± 0.05 |
| <i>CMT297C</i> | Ribosomal protein S6 kinase RSK-1                                | 0.94 ± 0.10 |
| <i>CMK279C</i> | Hypothetical protein                                             | 0.94 ± 0.19 |
| <i>CMM132C</i> | Mitochondrial propionyl-CoA carboxylase, beta subunit, precursor | 0.94 ± 0.01 |
| <i>CMR449C</i> | Hypothetical protein                                             | 0.94 ± 0.04 |
| <i>CME064C</i> | Chorismate synthase                                              | 0.94 ± 0.11 |
| <i>CMO037C</i> | Hypothetical protein                                             | 0.94 ± 0.02 |

|                |                                                                    |             |
|----------------|--------------------------------------------------------------------|-------------|
| <i>CMM099C</i> | Hypothetical protein                                               | 0.94 ± 0.08 |
| <i>CMR006C</i> | Hypothetical protein                                               | 0.94 ± 0.05 |
| <i>CMJ164C</i> | Cell differentiation protein rcd1                                  | 0.94 ± 0.11 |
| <i>CMN106C</i> | Similar to regulator of nonsense transcript stability              | 0.94 ± 0.14 |
| <i>CMC089C</i> | Unknown DUF21 containing protein                                   | 0.94 ± 0.02 |
| <i>CMO162C</i> | Similar to ring zinc finger protein                                | 0.94 ± 0.04 |
| <i>CMS375C</i> | Phospholipid-transporting ATPase IIA, E1-E2 ATPase                 | 0.94 ± 0.10 |
| <i>CMR327C</i> | Hypothetical protein                                               | 0.94 ± 0.17 |
| <i>CMH076C</i> | Similar to FKBP-type peptidyl-prolyl cis-trans isomerase           | 0.94 ± 0.08 |
| <i>CMT362C</i> | Sedoheptulose-1,7-bisphosphatase                                   | 0.94 ± 0.07 |
| <i>CMP129C</i> | Fructose-1,6-bisphosphatase                                        | 0.94 ± 0.08 |
| <i>CMS442C</i> | Hypothetical protein                                               | 0.94 ± 0.10 |
| <i>CMO082C</i> | Similar to nuclear LIM interactor-interacting factor               | 0.94 ± 0.12 |
| <i>CMT155C</i> | Hypothetical protein                                               | 0.94 ± 0.04 |
| <i>CMJ101C</i> | Similar to heat shock protein                                      | 0.94 ± 0.08 |
| <i>CMR215C</i> | Hypothetical protein                                               | 0.94 ± 0.08 |
| <i>CMT566C</i> | TATA-box binding protein-associated factor 2                       | 0.94 ± 0.02 |
| <i>CMK185C</i> | Hypothetical protein                                               | 0.94 ± 0.18 |
| <i>CMK183C</i> | 23S RNA pseudouridine 2633 synthase                                | 0.94 ± 0.04 |
| <i>CMQ198C</i> | Similar to prenylated Rab receptor 2                               | 0.94 ± 0.07 |
| <i>CMF039C</i> | Similar to hypothetical protein, conserved in cyanobacteria        | 0.94 ± 0.05 |
| <i>CMN260C</i> | Hypothetical protein                                               | 0.94 ± 0.05 |
| <i>CMG117C</i> | Hypothetical protein                                               | 0.94 ± 0.06 |
| <i>CMP149C</i> | Probable Mg <sup>2+</sup> transporter MgtE                         | 0.94 ± 0.02 |
| <i>CMC186C</i> | Similar to trefoil factor                                          | 0.94 ± 0.05 |
| <i>CML090C</i> | Probable degp protease precursor                                   | 0.94 ± 0.10 |
| <i>CMM212C</i> | Hypothetical protein                                               | 0.94 ± 0.09 |
| <i>CMT279C</i> | Similar to prostatic acid phosphatase precursor                    | 0.94 ± 0.02 |
| <i>CMR454C</i> | Hypothetical protein                                               | 0.94 ± 0.04 |
| <i>CMF052C</i> | Hypothetical protein                                               | 0.94 ± 0.08 |
| <i>CMM334C</i> | Similar to mitochondrial carrier protein                           | 0.94 ± 0.16 |
| <i>CMP072C</i> | Hypothetical protein                                               | 0.94 ± 0.14 |
| <i>CMT415C</i> | Similar to psbb mRNA maturation factor Mbb1, chloroplast precursor | 0.94 ± 0.10 |
| <i>CMJ102C</i> | Adaptor-related protein complex 1, mu subunit                      | 0.94 ± 0.06 |
| <i>CMC114C</i> | 26S proteasome ATP-dependent regulatory subunit                    | 0.94 ± 0.04 |
| <i>CMS420C</i> | Hypothetical protein                                               | 0.94 ± 0.06 |
| <i>CMQ178C</i> | Hypothetical protein                                               | 0.94 ± 0.09 |
| <i>CMP334C</i> | DnaJ (Hsp40) homolog, subfamily D                                  | 0.94 ± 0.05 |
| <i>CMP284C</i> | Similar to chloroplast outer membrane protein Toc34                | 0.94 ± 0.06 |
| <i>CMX012C</i> | 6-phosphogluconate dehydrogenase                                   | 0.94 ± 0.08 |
| <i>CMI082C</i> | Hypothetical protein                                               | 0.94 ± 0.08 |
| <i>CMI186C</i> | Cytochrome c-type biogenesis protein ccmE                          | 0.94 ± 0.03 |
| <i>CMM049C</i> | Hypothetical protein                                               | 0.94 ± 0.13 |

|                |                                                                        |             |
|----------------|------------------------------------------------------------------------|-------------|
| <i>CMO206C</i> | Similar to ribosomal RNA processing exonuclease RRP41                  | 0.94 ± 0.03 |
| <i>CMP066C</i> | Hypothetical protein                                                   | 0.94 ± 0.05 |
| <i>CMK140C</i> | Hypothetical protein                                                   | 0.94 ± 0.07 |
| <i>CMT074C</i> | AU-specific RNA-binding enoyl-CoA hydratase                            | 0.94 ± 0.04 |
| <i>CMM074C</i> | Hypothetical protein                                                   | 0.94 ± 0.05 |
| <i>CMG202C</i> | Hypothetical protein                                                   | 0.94 ± 0.11 |
| <i>CMP233C</i> | Hypothetical protein                                                   | 0.94 ± 0.08 |
| <i>CMN157C</i> | Hypothetical protein                                                   | 0.94 ± 0.03 |
| <i>CMT222C</i> | Unknown ring-finger protein                                            | 0.93 ± 0.01 |
| <i>CMQ070C</i> | Hypothetical protein                                                   | 0.93 ± 0.04 |
| <i>CME070C</i> | Unknown [2Fe-2S] ferredoxin                                            | 0.93 ± 0.15 |
| <i>CMG121C</i> | Hypothetical protein                                                   | 0.93 ± 0.08 |
| <i>CMN151C</i> | Probable ribonuclease R                                                | 0.93 ± 0.20 |
| <i>CMR318C</i> | Similar to nifu-like iron-sulfur cluster protein Isu1                  | 0.93 ± 0.02 |
| <i>CMB115C</i> | Hypothetical protein                                                   | 0.93 ± 0.06 |
| <i>CML155C</i> | ATP-dependent Clp protease proteolytic subunit                         | 0.93 ± 0.12 |
| <i>CMJ114C</i> | Hypothetical protein                                                   | 0.93 ± 0.11 |
| <i>CMQ209C</i> | MAP kinase                                                             | 0.93 ± 0.05 |
| <i>CMP096C</i> | Similar to C-methyltransferase                                         | 0.93 ± 0.17 |
| <i>CMI038C</i> | Mg-protoporphyrin O-methyltransferase                                  | 0.93 ± 0.11 |
| <i>CMS438C</i> | Similar to pre-mRNA splicing factor U2AF large chain                   | 0.93 ± 0.08 |
| <i>CMP032C</i> | Hypothetical protein                                                   | 0.93 ± 0.05 |
| <i>CMR069C</i> | Hypothetical protein                                                   | 0.93 ± 0.04 |
| <i>CMM174C</i> | Hypothetical protein                                                   | 0.93 ± 0.01 |
| <i>CMB008C</i> | Hypothetical protein                                                   | 0.93 ± 0.13 |
| <i>CMR330C</i> | Hypothetical protein                                                   | 0.93 ± 0.05 |
| <i>CMN286C</i> | Sodium/hydrogen antiporter NHE8                                        | 0.93 ± 0.04 |
| <i>CMQ125C</i> | Probable transcriptional regulator, SIN3                               | 0.93 ± 0.09 |
| <i>CMJ112C</i> | Vesicle coat complex COPII, subunit Sec13                              | 0.93 ± 0.06 |
| <i>CMO036C</i> | Probable ATP dependent RNA helicase                                    | 0.93 ± 0.05 |
| <i>CMF059C</i> | Hypothetical protein                                                   | 0.93 ± 0.09 |
| <i>CMD096C</i> | Similar to cytochrome P450 monooxygenase                               | 0.93 ± 0.10 |
| <i>CMS014C</i> | Hypothetical protein                                                   | 0.93 ± 0.09 |
| <i>CMH177C</i> | Similar to fructose-2,6-bisphosphatase                                 | 0.93 ± 0.06 |
| <i>CMI212C</i> | Similar to polyribonucleotide nucleotidyltransferase                   | 0.93 ± 0.10 |
| <i>CMQ283C</i> | 26S proteasome regulatory subunit                                      | 0.93 ± 0.06 |
| <i>CMR140C</i> | Similar to selenocysteine-specific elongation factor                   | 0.93 ± 0.08 |
| <i>CMH052C</i> | Pyrophosphate--fructose-6-phosphate 1-phosphotransferase, beta subunit | 0.93 ± 0.19 |
| <i>CMQ410C</i> | Hypothetical protein                                                   | 0.93 ± 0.04 |
| <i>CMT147C</i> | Similar to protein N-methyltransferase                                 | 0.93 ± 0.08 |
| <i>CMA101C</i> | Probable maintenance of ploidy protein MOB1                            | 0.93 ± 0.06 |
| <i>CML058C</i> | Excinuclease ABC subunit C                                             | 0.93 ± 0.11 |
| <i>CMT530C</i> | Similar to phenylamine binding protein, sterol isomerase               | 0.93 ± 0.11 |

|                |                                                                               |             |
|----------------|-------------------------------------------------------------------------------|-------------|
| <i>CMD106C</i> | Hypothetical protein                                                          | 0.93 ± 0.10 |
| <i>CMQ252C</i> | Nitrilase                                                                     | 0.93 ± 0.04 |
| <i>CMS290C</i> | Hypothetical protein                                                          | 0.93 ± 0.04 |
| <i>CMN205C</i> | Hypothetical protein                                                          | 0.93 ± 0.14 |
| <i>CMT311C</i> | Hypothetical protein                                                          | 0.93 ± 0.04 |
| <i>CMQ473C</i> | Transmembrane 9 superfamily protein                                           | 0.93 ± 0.03 |
| <i>CMK065C</i> | Hypothetical protein                                                          | 0.93 ± 0.03 |
| <i>CMA068C</i> | Hydroxymethylglutaryl-CoA lyase, mitochondrial precursor                      | 0.93 ± 0.03 |
| <i>CML102C</i> | Histone acetyltransferase HAC108/MYST                                         | 0.93 ± 0.05 |
| <i>CME106C</i> | Hypothetical protein                                                          | 0.93 ± 0.06 |
| <i>CMB126C</i> | Dehydrololichyl diphosphate synthase                                          | 0.93 ± 0.08 |
| <i>CMH139C</i> | Hypothetical protein                                                          | 0.93 ± 0.03 |
| <i>CMO024C</i> | 40S ribosomal protein S28                                                     | 0.93 ± 0.02 |
| <i>CMI172C</i> | Unknown cyanobacterial protein                                                | 0.93 ± 0.02 |
| <i>CMF159C</i> | AAA-metalloprotease ftsh, mitochondrial precursor                             | 0.93 ± 0.08 |
| <i>CMT168C</i> | Probable alpha-1,3-mannosyltransferase ALG2                                   | 0.93 ± 0.04 |
| <i>CMS275C</i> | Hypothetical protein                                                          | 0.93 ± 0.04 |
| <i>CMT012C</i> | Similar to C3HC4 zinc-binding integral peroxisomal membrane protein PEX10     | 0.93 ± 0.06 |
| <i>CMF024C</i> | Hypothetical protein                                                          | 0.93 ± 0.07 |
| <i>CMN321C</i> | Hypothetical protein                                                          | 0.93 ± 0.05 |
| <i>CMR135C</i> | Hypothetical protein                                                          | 0.93 ± 0.09 |
| <i>CMT193C</i> | Hypothetical protein                                                          | 0.93 ± 0.11 |
| <i>CMS079C</i> | Hypothetical protein                                                          | 0.93 ± 0.03 |
| <i>CMQ129C</i> | Unknown methyltransferase                                                     | 0.93 ± 0.02 |
| <i>CMN118C</i> | Hypothetical protein                                                          | 0.93 ± 0.05 |
| <i>CMO088C</i> | Hypothetical protein                                                          | 0.93 ± 0.02 |
| <i>CMM028C</i> | Hypothetical protein                                                          | 0.93 ± 0.10 |
| <i>CMP310C</i> | Probable WD repeat domain protein                                             | 0.93 ± 0.06 |
| <i>CMT204C</i> | 4-alpha-glucanotransferase                                                    | 0.93 ± 0.08 |
| <i>CMM103C</i> | Hypothetical protein                                                          | 0.93 ± 0.03 |
| <i>CMI088C</i> | ATP-binding cassette, sub-family G                                            | 0.93 ± 0.04 |
| <i>CMM150C</i> | Similar to I kappa B kinase complex-associated protein                        | 0.93 ± 0.08 |
| <i>CMC155C</i> | Hypothetical protein                                                          | 0.93 ± 0.08 |
| <i>CMT463C</i> | Hypothetical protein                                                          | 0.93 ± 0.10 |
| <i>CMR271C</i> | Hypothetical protein                                                          | 0.93 ± 0.08 |
| <i>CMI227C</i> | Probable G2/mitotic-specific cyclin 1                                         | 0.93 ± 0.04 |
| <i>CMB158C</i> | Similar to trehalose synthase                                                 | 0.93 ± 0.04 |
| <i>CMJ044C</i> | Phycocyanobilin lyase beta subunit                                            | 0.93 ± 0.03 |
| <i>CMK210C</i> | Cysteine--tRNA ligase, mitochondrial or chloroplast                           | 0.93 ± 0.05 |
| <i>CMO142C</i> | Serine hydroxymethyltransferase, cytosolic (glycine hydroxymethyltransferase) | 0.93 ± 0.04 |
| <i>CMI049C</i> | Fructose-1,6-biphosphate aldolase, chloroplast precursor                      | 0.93 ± 0.16 |
| <i>CMH179C</i> | Similar to nucleoporin 155kDa                                                 | 0.93 ± 0.01 |
| <i>CMQ397C</i> | Probable S-formylglutathione hydrolase                                        | 0.93 ± 0.08 |

|                |                                                                              |             |
|----------------|------------------------------------------------------------------------------|-------------|
| <i>CMT381C</i> | Enoyl-[acyl-carrier-protein] reductase [NADH]                                | 0.92 ± 0.09 |
| <i>CMS471C</i> | Mitochondrial presequence translocase subunit Tim17                          | 0.92 ± 0.04 |
| <i>CMT269C</i> | Probable MAP kinase kinase (MAP2K)                                           | 0.92 ± 0.15 |
| <i>CME080C</i> | Hypothetical protein                                                         | 0.92 ± 0.14 |
| <i>CME109C</i> | Probable 1-acylglycerol-3-phosphate O-acyltransferase                        | 0.92 ± 0.07 |
| <i>CMO340C</i> | Hypothetical protein                                                         | 0.92 ± 0.01 |
| <i>CMN325C</i> | ATP-binding cassette, sub-family B (TAP), member 10, mitochondrial precursor | 0.92 ± 0.08 |
| <i>CMQ177C</i> | Similar to ribosome biogenesis protein SSF1                                  | 0.92 ± 0.06 |
| <i>CMS164C</i> | Unknown kinase with aarF domain                                              | 0.92 ± 0.02 |
| <i>CMR234C</i> | DNA replication licensing factor MCM7                                        | 0.92 ± 0.07 |
| <i>CMQ405C</i> | Unknown protease                                                             | 0.92 ± 0.05 |
| <i>CMD165C</i> | Hypothetical protein                                                         | 0.92 ± 0.09 |
| <i>CMI258C</i> | Hypothetical protein                                                         | 0.92 ± 0.09 |
| <i>CMT171C</i> | Hypothetical protein                                                         | 0.92 ± 0.06 |
| <i>CMF166C</i> | Hypothetical protein                                                         | 0.92 ± 0.07 |
| <i>CMC049C</i> | Similar to dtdp-4-dehydrorhamnose reductase                                  | 0.92 ± 0.15 |
| <i>CMD015C</i> | Raf-related MAP kinase kinase kinase (MAP3K), theta-type                     | 0.92 ± 0.04 |
| <i>CMR089C</i> | Similar to Raf/ATN-like protein kinase                                       | 0.92 ± 0.13 |
| <i>CMI219C</i> | Hypothetical protein                                                         | 0.92 ± 0.16 |
| <i>CMR455C</i> | Similar to serine dehydratase                                                | 0.92 ± 0.07 |
| <i>CMB009C</i> | Asparagine synthase                                                          | 0.92 ± 0.04 |
| <i>CMQ257C</i> | Hypothetical protein                                                         | 0.92 ± 0.08 |
| <i>CMD068C</i> | Hypothetical protein                                                         | 0.92 ± 0.05 |
| <i>CMM284C</i> | Similar to DNA-damage-inducible protein P                                    | 0.92 ± 0.05 |
| <i>CMQ355C</i> | Hypothetical protein                                                         | 0.92 ± 0.05 |
| <i>CMQ016C</i> | Hypothetical protein                                                         | 0.92 ± 0.11 |
| <i>CML098C</i> | Cytochrome c oxidase (Complex IV) subunit Vb                                 | 0.92 ± 0.08 |
| <i>CMT159C</i> | 40S ribosomal protein S8                                                     | 0.92 ± 0.01 |
| <i>CMS092C</i> | Hypothetical protein                                                         | 0.92 ± 0.11 |
| <i>CMM163C</i> | Hypothetical protein                                                         | 0.92 ± 0.04 |
| <i>CMT411C</i> | Hypothetical protein                                                         | 0.92 ± 0.05 |
| <i>CMR474C</i> | Undecaprenyl pyrophosphate synthetase                                        | 0.92 ± 0.02 |
| <i>CMJ163C</i> | Hypothetical protein                                                         | 0.92 ± 0.01 |
| <i>CMT287C</i> | Unknown zinc-finger protein                                                  | 0.92 ± 0.04 |
| <i>CMC133C</i> | Similar to oxygen-evolving complex component psbQ                            | 0.92 ± 0.06 |
| <i>CMN326C</i> | Similar to MAP kinase phosphatase-1                                          | 0.92 ± 0.05 |
| <i>CML180C</i> | Similar to 3'-5' exoribonuclease CSL4                                        | 0.92 ± 0.07 |
| <i>CMN120C</i> | Similar to Vacuolar protein sorting-associated protein VPS28                 | 0.92 ± 0.09 |
| <i>CMS254C</i> | Similar to triacylglycerol lipase                                            | 0.92 ± 0.13 |
| <i>CML104C</i> | Similar to nuclear prelamin A recognition factor                             | 0.92 ± 0.06 |
| <i>CMH007C</i> | Hypothetical protein                                                         | 0.92 ± 0.07 |
| <i>CMI165C</i> | Similar to endoplasmic reticulum resident protein                            | 0.92 ± 0.05 |
| <i>CML056C</i> | Hypothetical protein                                                         | 0.92 ± 0.06 |

|                |                                                           |             |
|----------------|-----------------------------------------------------------|-------------|
| <i>CMS308C</i> | Unknown suger epimerase                                   | 0.92 ± 0.07 |
| <i>CMS436C</i> | Hypothetical protein                                      | 0.92 ± 0.07 |
| <i>CMN251C</i> | ATP-binding cassette, sub-family C (MRP), member 1        | 0.92 ± 0.05 |
| <i>CMF174C</i> | Similar to tight junction plaque protein Symplekin        | 0.92 ± 0.05 |
| <i>CMS323C</i> | Hypothetical protein                                      | 0.92 ± 0.02 |
| <i>CMI292C</i> | Branchpoint bridging protein Msl5p                        | 0.92 ± 0.04 |
| <i>CMP017C</i> | Probable CGI-27 protein                                   | 0.92 ± 0.14 |
| <i>CMS320C</i> | Similar to inositol 1,3,4-trisphosphate 5/6-kinase        | 0.92 ± 0.06 |
| <i>CML150C</i> | Prokaryote-type translation initiation factor IF-2        | 0.92 ± 0.05 |
| <i>CMO297C</i> | Hypothetical protein                                      | 0.92 ± 0.07 |
| <i>CMC132C</i> | Mitochondrial ribosomal protein L15 precursor             | 0.92 ± 0.04 |
| <i>CMJ097C</i> | Hypothetical protein                                      | 0.92 ± 0.07 |
| <i>CMM015C</i> | Hypothetical protein                                      | 0.92 ± 0.05 |
| <i>CMN068C</i> | Similar to U3 snoRNP protein Utp20p                       | 0.92 ± 0.10 |
| <i>CMB124C</i> | Hypothetical protein                                      | 0.92 ± 0.08 |
| <i>CMR316C</i> | Hypothetical protein                                      | 0.92 ± 0.06 |
| <i>CMM048C</i> | Pre-mRNA splicing factor ATP-dependent RNA helicase PRP43 | 0.92 ± 0.04 |
| <i>CMT255C</i> | Hypothetical protein                                      | 0.92 ± 0.08 |
| <i>CMT549C</i> | Hypothetical protein                                      | 0.92 ± 0.08 |
| <i>CML133C</i> | 26S proteasome regulatory module subunit                  | 0.92 ± 0.04 |
| <i>CMR244C</i> | Probable dehydrogenase                                    | 0.92 ± 0.19 |
| <i>CMT088C</i> | Hypothetical protein                                      | 0.92 ± 0.05 |
| <i>CMN283C</i> | Hypothetical protein                                      | 0.92 ± 0.08 |
| <i>CMI157C</i> | ATP-dependent zinc protease                               | 0.92 ± 0.04 |
| <i>CMI177C</i> | Hypothetical protein                                      | 0.92 ± 0.04 |
| <i>CMO186C</i> | Hypothetical protein                                      | 0.92 ± 0.10 |
| <i>CMP237C</i> | Similar to UDP N-acetylglucosamine transporter            | 0.92 ± 0.02 |
| <i>CMI290C</i> | Manganese-stabilizing protein precursor                   | 0.92 ± 0.03 |
| <i>CMT257C</i> | Small GTP-binding protein of Ran family                   | 0.92 ± 0.07 |
| <i>CMM290C</i> | Hypothetical protein                                      | 0.92 ± 0.02 |
| <i>CMO184C</i> | Similar to hedgehog protein                               | 0.92 ± 0.02 |
| <i>CMN297C</i> | Hypothetical protein                                      | 0.92 ± 0.06 |
| <i>CMB028C</i> | Unknown bromodomain-containing protein                    | 0.91 ± 0.10 |
| <i>CMP019C</i> | Hypothetical protein                                      | 0.91 ± 0.07 |
| <i>CMQ072C</i> | Hypothetical protein                                      | 0.91 ± 0.07 |
| <i>CMT035C</i> | Hypothetical protein                                      | 0.91 ± 0.02 |
| <i>CMN086C</i> | Hypothetical protein                                      | 0.91 ± 0.01 |
| <i>CMQ365C</i> | Phosphoribosylformylglycinamide synthase                  | 0.91 ± 0.04 |
| <i>CMQ268C</i> | Hypothetical protein                                      | 0.91 ± 0.05 |
| <i>CMJ067C</i> | Hypothetical protein                                      | 0.91 ± 0.17 |
| <i>CMQ421C</i> | Mitochondrial ribosomal protein L4 precursor              | 0.91 ± 0.03 |
| <i>CMT376C</i> | Exosome complex exonuclease Rrp4                          | 0.91 ± 0.06 |
| <i>CMJ115C</i> | Hypothetical protein                                      | 0.91 ± 0.02 |

|                |                                                                                                                                                        |      |   |      |
|----------------|--------------------------------------------------------------------------------------------------------------------------------------------------------|------|---|------|
| <i>CMN072C</i> | Similar to mitochondrial distribution and morphology mutant Mdm38                                                                                      | 0.91 | ± | 0.12 |
| <i>CMQ290C</i> | Probable DNA mismatch repair protein MLH1                                                                                                              | 0.91 | ± | 0.06 |
| <i>CMA085C</i> | Hypothetical protein                                                                                                                                   | 0.91 | ± | 0.02 |
| <i>CMH146C</i> | Polyribonucleotide nucleotidyltransferase                                                                                                              | 0.91 | ± | 0.15 |
| <i>CMN150C</i> | Probable adenylate kinase                                                                                                                              | 0.91 | ± | 0.04 |
| <i>CMP320C</i> | Hypothetical protein                                                                                                                                   | 0.91 | ± | 0.04 |
| <i>CMD017C</i> | Hypothetical protein                                                                                                                                   | 0.91 | ± | 0.03 |
| <i>CMS076C</i> | Hypothetical protein                                                                                                                                   | 0.91 | ± | 0.04 |
| <i>CMR479C</i> | P68 RNA helicase                                                                                                                                       | 0.91 | ± | 0.13 |
| <i>CMM058C</i> | Hypothetical protein                                                                                                                                   | 0.91 | ± | 0.03 |
| <i>CMS208C</i> | Threonine--tRNA ligase, cytoplasmic                                                                                                                    | 0.91 | ± | 0.01 |
| <i>CMD117C</i> | Similar to enhancer of polycomb                                                                                                                        | 0.91 | ± | 0.08 |
| <i>CMR358C</i> | Hypothetical protein                                                                                                                                   | 0.91 | ± | 0.08 |
| <i>CME190C</i> | Mitochondrial ribosomal protein L19 precursor                                                                                                          | 0.91 | ± | 0.08 |
| <i>CMN334C</i> | Hypothetical protein                                                                                                                                   | 0.91 | ± | 0.02 |
| <i>CMS348C</i> | Hypothetical protein                                                                                                                                   | 0.91 | ± | 0.06 |
| <i>CMM040C</i> | 60S ribosomal protein L30                                                                                                                              | 0.91 | ± | 0.10 |
| <i>CMR378C</i> | Hypothetical protein                                                                                                                                   | 0.91 | ± | 0.07 |
| <i>CMT405C</i> | Unknown hydrolase                                                                                                                                      | 0.91 | ± | 0.03 |
| <i>CMB032C</i> | Chloroplast ribosomal protein S21 precursor                                                                                                            | 0.91 | ± | 0.02 |
| <i>CMC010C</i> | Similar to U3 snoRNP component Imp3p                                                                                                                   | 0.91 | ± | 0.14 |
| <i>CMT110C</i> | Sulfate adenylyltransferase                                                                                                                            | 0.91 | ± | 0.16 |
| <i>CMC020C</i> | Probable cytosolic IMP-GMP specific 5'-nucleotidase                                                                                                    | 0.91 | ± | 0.04 |
| <i>CMF147C</i> | Hypothetical protein                                                                                                                                   | 0.91 | ± | 0.11 |
| <i>CMS386C</i> | Anaphase promoting complex subunit 11                                                                                                                  | 0.91 | ± | 0.01 |
| <i>CMC102C</i> | Similar to anaphase-promoting complex subunit 2                                                                                                        | 0.91 | ± | 0.04 |
| <i>CM1218C</i> | Hypothetical protein                                                                                                                                   | 0.91 | ± | 0.04 |
| <i>CMD146C</i> | Similar to 3-oxo-5-alpha-steroid 4-dehydrogenase                                                                                                       | 0.91 | ± | 0.02 |
| <i>CMP118C</i> | E3 ubiquitin ligase SCF complex SKP1 subunit                                                                                                           | 0.91 | ± | 0.05 |
| <i>CMB094C</i> | Similar to membrane protein                                                                                                                            | 0.91 | ± | 0.09 |
| <i>CMF105C</i> | Similar to mtn3-like protein                                                                                                                           | 0.91 | ± | 0.02 |
| <i>CMK263C</i> | Plastid envelope protein CRUMPLED LEAF                                                                                                                 | 0.91 | ± | 0.08 |
| <i>CMG063C</i> | Similar to RNA helicase II binding protein                                                                                                             | 0.91 | ± | 0.04 |
| <i>CMA107C</i> | Probable proline aminopeptidase P                                                                                                                      | 0.91 | ± | 0.07 |
| <i>CMS034C</i> | Probable structure specific recognition protein, recombination signal sequence recognition protein, chromatin-specific transcription elongation factor | 0.91 | ± | 0.09 |
| <i>CMT578C</i> | Similar to methylated-DNA--protein-cysteine methyltransferase                                                                                          | 0.91 | ± | 0.03 |
| <i>CMO029C</i> | Hypothetical protein                                                                                                                                   | 0.91 | ± | 0.09 |
| <i>CMS194C</i> | Similar to cell polarity protein alp13                                                                                                                 | 0.91 | ± | 0.07 |
| <i>CMR088C</i> | Hypothetical protein                                                                                                                                   | 0.91 | ± | 0.07 |
| <i>CMN112C</i> | Mitochondrial ribosomal protein L23 precursor                                                                                                          | 0.91 | ± | 0.03 |
| <i>CMK070C</i> | Hypothetical protein                                                                                                                                   | 0.91 | ± | 0.07 |
| <i>CMS029C</i> | Similar to RNA guanylyltransferase and 5'-phosphatase                                                                                                  | 0.91 | ± | 0.06 |
| <i>CMO152C</i> | Signal recognition particle recognition component SRP54                                                                                                | 0.91 | ± | 0.10 |

|                |                                                                                |             |
|----------------|--------------------------------------------------------------------------------|-------------|
| <i>CMT339C</i> | Hypothetical protein                                                           | 0.91 ± 0.04 |
| <i>CMO325C</i> | Hypothetical protein                                                           | 0.91 ± 0.09 |
| <i>CMA116C</i> | Hypothetical protein                                                           | 0.91 ± 0.12 |
| <i>CMQ286C</i> | DNA primase, bacterial-type                                                    | 0.91 ± 0.03 |
| <i>CMS360C</i> | Hypothetical protein                                                           | 0.91 ± 0.04 |
| <i>CMG194C</i> | Similar to phosphoribosylanthranilate isomerase                                | 0.91 ± 0.04 |
| <i>CMA028C</i> | Hypothetical protein                                                           | 0.91 ± 0.08 |
| <i>CME147C</i> | Hypothetical protein                                                           | 0.91 ± 0.09 |
| <i>CME031C</i> | Hypothetical protein                                                           | 0.91 ± 0.03 |
| <i>CMT117C</i> | Probable hydroxyacylglutathione hydrolase cytoplasmic (glyoxalase II) (GLX II) | 0.91 ± 0.06 |
| <i>CMM134C</i> | Hypothetical protein                                                           | 0.91 ± 0.18 |
| <i>CMR295C</i> | Hypothetical protein                                                           | 0.91 ± 0.05 |
| <i>CMQ230C</i> | Diaminopimelate epimerase                                                      | 0.91 ± 0.02 |
| <i>CMO210C</i> | Hypothetical protein                                                           | 0.91 ± 0.09 |
| <i>CMR412C</i> | Hypothetical protein                                                           | 0.91 ± 0.02 |
| <i>CMD163C</i> | Probable molybdopterin converting factor small subunit Moad                    | 0.91 ± 0.01 |
| <i>CMS377C</i> | Casein kinase I                                                                | 0.91 ± 0.02 |
| <i>CMN031C</i> | Similar to glucosamine-phosphate N-acetyltransferase                           | 0.91 ± 0.04 |
| <i>CMS116C</i> | Similar to protein transport protein SEC61 gamma subunit                       | 0.91 ± 0.04 |
| <i>CMP178C</i> | Similar to ubiquitin conjugating enzyme E2                                     | 0.91 ± 0.07 |
| <i>CMT154C</i> | 40S ribosomal protein S6                                                       | 0.91 ± 0.01 |
| <i>CMN039C</i> | Probable endopeptidase IV, signal peptide peptidase, SppA                      | 0.91 ± 0.03 |
| <i>CMH075C</i> | Similar to mitochondrial carrier protein                                       | 0.91 ± 0.08 |
| <i>CMM070C</i> | Similar to decapping enzyme complex component DCP1                             | 0.91 ± 0.06 |
| <i>CMH050C</i> | Hypothetical protein                                                           | 0.91 ± 0.05 |
| <i>CMI007C</i> | Hypothetical protein                                                           | 0.91 ± 0.07 |
| <i>CMT041C</i> | Hypothetical protein                                                           | 0.91 ± 0.04 |
| <i>CMK058C</i> | Geranylgeranyl diphosphate synthase, chloroplast precursor                     | 0.91 ± 0.02 |
| <i>CMR211C</i> | Similar to DnaJ-like protein Jem1p                                             | 0.91 ± 0.03 |
| <i>CMM206C</i> | Similar to trefoil factor                                                      | 0.91 ± 0.03 |
| <i>CMK282C</i> | Hypothetical protein                                                           | 0.91 ± 0.02 |
| <i>CMH115C</i> | 2-C-methyl-D-erythritol 4-phosphate cytidyltransferase                         | 0.91 ± 0.02 |
| <i>CMH026C</i> | Similar to (N6-adenosine)-methyltransferase                                    | 0.91 ± 0.02 |
| <i>CMD062C</i> | Small GTP-binding protein of Rab family                                        | 0.91 ± 0.09 |
| <i>CMD104C</i> | Delta-aminolevulinic acid dehydratase (porphobilinogen synthase)               | 0.91 ± 0.09 |
| <i>CMP164C</i> | Similar to ribonuclease III (rnc)                                              | 0.91 ± 0.16 |
| <i>CMN014C</i> | Probable serine palmitoyltransferase                                           | 0.91 ± 0.05 |
| <i>CML137C</i> | ATP-dependent RNA helicase                                                     | 0.91 ± 0.09 |
| <i>CMD143C</i> | Hypothetical protein                                                           | 0.91 ± 0.04 |
| <i>CMK205C</i> | RNA lariat debranching enzyme                                                  | 0.91 ± 0.05 |
| <i>CMR021C</i> | Adaptor-related protein complex 2, beta subunit                                | 0.91 ± 0.02 |
| <i>CMT286C</i> | Hypothetical protein                                                           | 0.91 ± 0.03 |
| <i>CMJ100C</i> | Similar to heat shock protein, low molecular weight                            | 0.91 ± 0.03 |



|                |                                                                              |             |
|----------------|------------------------------------------------------------------------------|-------------|
| <i>CMO040C</i> | Hypothetical protein                                                         | 0.91 ± 0.15 |
| <i>CMS146C</i> | Similar to receptor lectin kinase 3                                          | 0.91 ± 0.07 |
| <i>CMC077C</i> | Probable 1-aminocyclopropane-1-carboxylate deaminase                         | 0.91 ± 0.08 |
| <i>CMH107C</i> | Ubiquinone biosynthesis protein COQ7                                         | 0.91 ± 0.04 |
| <i>CMR117C</i> | 4-aminobutyrate aminotransferase                                             | 0.91 ± 0.09 |
| <i>CMD081C</i> | Probable O-sialoglycoprotein endopeptidase                                   | 0.91 ± 0.04 |
| <i>CMK154C</i> | Hypothetical protein                                                         | 0.91 ± 0.07 |
| <i>CMP321C</i> | Similar to anaphase-promoting complex subunit 10                             | 0.91 ± 0.02 |
| <i>CMP022C</i> | Hypothetical protein                                                         | 0.91 ± 0.02 |
| <i>CMB092C</i> | Flavin-dependent tRNA:m5U methyltransferase trmFO                            | 0.91 ± 0.05 |
| <i>CMJ244C</i> | Hypothetical protein                                                         | 0.91 ± 0.09 |
| <i>CMG214C</i> | Hypothetical protein                                                         | 0.91 ± 0.03 |
| <i>CMT503C</i> | Hypothetical protein                                                         | 0.91 ± 0.05 |
| <i>CME142C</i> | Similar to retinoblastoma binding protein 2                                  | 0.90 ± 0.04 |
| <i>CMQ245C</i> | Hypothetical protein                                                         | 0.90 ± 0.09 |
| <i>CMC091C</i> | NADH dehydrogenase I (Complex I) alpha subcomplex 9                          | 0.90 ± 0.05 |
| <i>CMT564C</i> | Hypothetical protein                                                         | 0.90 ± 0.06 |
| <i>CMJ177C</i> | Hypothetical protein                                                         | 0.90 ± 0.03 |
| <i>CMS118C</i> | Hypothetical protein                                                         | 0.90 ± 0.07 |
| <i>CMJ247C</i> | Hypothetical protein                                                         | 0.90 ± 0.08 |
| <i>CMT568C</i> | Hypothetical protein                                                         | 0.90 ± 0.06 |
| <i>CMT343C</i> | Unknown methyl transferase                                                   | 0.90 ± 0.07 |
| <i>CMJ217C</i> | Hypothetical protein                                                         | 0.90 ± 0.13 |
| <i>CMS234C</i> | Hypothetical protein                                                         | 0.90 ± 0.00 |
| <i>CMJ248C</i> | Photosystem II 12 kDa extrinsic protein                                      | 0.90 ± 0.06 |
| <i>CMJ257C</i> | Hypothetical protein                                                         | 0.90 ± 0.06 |
| <i>CMQ249C</i> | Hypothetical protein                                                         | 0.90 ± 0.07 |
| <i>CMQ472C</i> | Similar to chromatin accessibility complex 1                                 | 0.90 ± 0.03 |
| <i>CMK269C</i> | Fusion protein of 3-dehydroquinate dehydratase and shikimate 5-dehydrogenase | 0.90 ± 0.04 |
| <i>CMF090C</i> | Probable phosphatidylethanolamine methyltransferase                          | 0.90 ± 0.09 |
| <i>CMP044C</i> | Hypothetical protein                                                         | 0.90 ± 0.02 |
| <i>CMH074C</i> | Ubiquitin-specific protease UBP15                                            | 0.90 ± 0.05 |
| <i>CMK237C</i> | Hypothetical protein                                                         | 0.90 ± 0.08 |
| <i>CMH083C</i> | Similar to mutator MutT protein                                              | 0.90 ± 0.09 |
| <i>CMJ272C</i> | Phosphoglucomutase                                                           | 0.90 ± 0.10 |
| <i>CME048C</i> | Hypothetical protein                                                         | 0.90 ± 0.02 |
| <i>CMQ306C</i> | Similar to ribosomal protein L11 methyltransferase                           | 0.90 ± 0.05 |
| <i>CMF060C</i> | Similar to dishevelled associated activator of morphogenesis                 | 0.90 ± 0.06 |
| <i>CMR255C</i> | Probable inorganic pyrophosphatase precursor                                 | 0.90 ± 0.07 |
| <i>CMT224C</i> | Probable ubiquitin-specific protease                                         | 0.90 ± 0.05 |
| <i>CMA009C</i> | NAD-dependent sorbitol dehydrogenase                                         | 0.90 ± 0.01 |
| <i>CME005C</i> | Hypothetical protein                                                         | 0.90 ± 0.04 |
| <i>CMR113C</i> | Hypothetical protein                                                         | 0.90 ± 0.09 |

|                |                                                                   |             |
|----------------|-------------------------------------------------------------------|-------------|
| <i>CMN016C</i> | Hypothetical protein                                              | 0.90 ± 0.02 |
| <i>CMJ095C</i> | Hypothetical protein                                              | 0.90 ± 0.07 |
| <i>CMK255C</i> | Hypothetical protein                                              | 0.90 ± 0.03 |
| <i>CMJ199C</i> | Similar to UMP/CMP kinase                                         | 0.90 ± 0.04 |
| <i>CMR062C</i> | Hypothetical protein                                              | 0.90 ± 0.04 |
| <i>CMR391C</i> | Hypothetical protein                                              | 0.90 ± 0.06 |
| <i>CMN081C</i> | Hypothetical protein                                              | 0.90 ± 0.05 |
| <i>CMM201C</i> | Hypothetical protein                                              | 0.90 ± 0.01 |
| <i>CMF042C</i> | Similar to programmed cell death protein 5 (TFAR19)               | 0.90 ± 0.07 |
| <i>CMS366C</i> | Hypothetical protein                                              | 0.90 ± 0.08 |
| <i>CMK120C</i> | Hypothetical protein                                              | 0.90 ± 0.01 |
| <i>CMJ141C</i> | ATP-dependent Clp protease proteolytic subunit                    | 0.90 ± 0.06 |
| <i>CMH142C</i> | Hypothetical protein                                              | 0.90 ± 0.03 |
| <i>CMD171C</i> | Probable N-ethylmethylamine chlorohydrolase                       | 0.90 ± 0.03 |
| <i>CMR105C</i> | Hypothetical protein                                              | 0.90 ± 0.09 |
| <i>CMQ053C</i> | 5-amino-6-(5-phosphoribosylamino)uracil reductase                 | 0.90 ± 0.05 |
| <i>CML318C</i> | Hypothetical protein                                              | 0.90 ± 0.08 |
| <i>CMK272C</i> | Hypothetical protein                                              | 0.90 ± 0.02 |
| <i>CMA083C</i> | Hypothetical protein                                              | 0.90 ± 0.06 |
| <i>CMQ362C</i> | Hypothetical protein                                              | 0.90 ± 0.04 |
| <i>CMH166C</i> | DNA gyrase subunit B                                              | 0.90 ± 0.10 |
| <i>CMN309C</i> | Hypothetical protein                                              | 0.90 ± 0.07 |
| <i>CMT087C</i> | Similar to DNA replication licensing factor MCM8                  | 0.90 ± 0.08 |
| <i>CMN231C</i> | Similar to tRNA intron endonuclease                               | 0.90 ± 0.08 |
| <i>CMD057C</i> | Hypothetical protein                                              | 0.90 ± 0.12 |
| <i>CML232C</i> | RIM15-like serine/threonine kinase                                | 0.90 ± 0.11 |
| <i>CMH064C</i> | Similar to guanine nucleotide exchange factor                     | 0.90 ± 0.15 |
| <i>CMP002C</i> | Similar to hedgehog protein                                       | 0.90 ± 0.11 |
| <i>CMM205C</i> | Hypothetical protein                                              | 0.90 ± 0.05 |
| <i>CMJ223C</i> | Retroelement                                                      | 0.90 ± 0.03 |
| <i>CMP339C</i> | Similar to Golgi vesicular membrane trafficking protein Bet1p     | 0.90 ± 0.05 |
| <i>CMS226C</i> | Hypothetical protein                                              | 0.90 ± 0.06 |
| <i>CMS077C</i> | Hypothetical protein                                              | 0.90 ± 0.05 |
| <i>CMQ001C</i> | Similar to dolichyl-phosphate-mannose:protein mannosyltransferase | 0.90 ± 0.06 |
| <i>CMT201C</i> | Hypothetical protein                                              | 0.90 ± 0.14 |
| <i>CMS267C</i> | Phosphatidylinositol 4-kinase                                     | 0.90 ± 0.05 |
| <i>CMM274C</i> | Lysine--tRNA ligase, cytoplasmic                                  | 0.90 ± 0.07 |
| <i>CMT115C</i> | Similar to transcriptional coactivator p100                       | 0.90 ± 0.07 |
| <i>CMD142C</i> | Hypothetical protein                                              | 0.90 ± 0.05 |
| <i>CMK283C</i> | Hypothetical protein                                              | 0.90 ± 0.05 |
| <i>CMG087C</i> | Similar to lysosomal sphingomyelin phosphodiesterase              | 0.90 ± 0.03 |
| <i>CMS394C</i> | Hypothetical protein                                              | 0.90 ± 0.09 |
| <i>CMT382C</i> | Hypothetical protein                                              | 0.90 ± 0.08 |

|                |                                                                                              |             |
|----------------|----------------------------------------------------------------------------------------------|-------------|
| <i>CMT285C</i> | Phosphoglucomutase                                                                           | 0.90 ± 0.18 |
| <i>CMN046C</i> | Sporulation-induced transcript 4-associated protein SAPLb                                    | 0.90 ± 0.05 |
| <i>CMP274C</i> | Hypothetical protein                                                                         | 0.90 ± 0.13 |
| <i>CMQ017C</i> | Hypothetical protein                                                                         | 0.90 ± 0.03 |
| <i>CMM012C</i> | Ring finger protein                                                                          | 0.90 ± 0.06 |
| <i>CMT583C</i> | RNA polymerase II subunit                                                                    | 0.90 ± 0.07 |
| <i>CMG129C</i> | MYB-related protein                                                                          | 0.90 ± 0.07 |
| <i>CMP186C</i> | Hypothetical protein                                                                         | 0.90 ± 0.04 |
| <i>CMC069C</i> | Hypothetical protein                                                                         | 0.90 ± 0.02 |
| <i>CMR100C</i> | Similar to mannose-P-dolichol utilization defect 1 protein                                   | 0.90 ± 0.07 |
| <i>CML117C</i> | Hypothetical protein                                                                         | 0.90 ± 0.04 |
| <i>CMH072C</i> | Hypothetical protein                                                                         | 0.90 ± 0.04 |
| <i>CMD008C</i> | Hypothetical protein                                                                         | 0.90 ± 0.04 |
| <i>CML126C</i> | Similar to indoleglycerol phosphate synthase                                                 | 0.90 ± 0.03 |
| <i>CMT331C</i> | Hypothetical protein                                                                         | 0.90 ± 0.07 |
| <i>CMN030C</i> | Hypothetical protein                                                                         | 0.90 ± 0.04 |
| <i>CMD167C</i> | Hypothetical protein                                                                         | 0.90 ± 0.05 |
| <i>CMJ036C</i> | Cytochrome c oxidase (Complex IV) subunit VIa                                                | 0.90 ± 0.06 |
| <i>CMG188C</i> | 20S core proteasome subunit beta 3                                                           | 0.90 ± 0.11 |
| <i>CMI013C</i> | Hypothetical protein                                                                         | 0.90 ± 0.02 |
| <i>CMO202C</i> | Coatomer protein complex, subunit delta                                                      | 0.90 ± 0.02 |
| <i>CMR141C</i> | Hypothetical protein                                                                         | 0.90 ± 0.09 |
| <i>CMJ076C</i> | Similar to coenzyme F420-reducing hydrogenase, beta subunit                                  | 0.90 ± 0.06 |
| <i>CMA007C</i> | Serine acetyltransferase (SAT)                                                               | 0.90 ± 0.12 |
| <i>CMG066C</i> | Aspartate aminotransferase, HisC in bacteria                                                 | 0.89 ± 0.03 |
| <i>CMR030C</i> | Probable membrane-associated zinc metalloprotease                                            | 0.89 ± 0.04 |
| <i>CMF050C</i> | Similar to ribulose-1,5 bisphosphate carboxylase/oxygenase large subunit N-methyltransferase | 0.89 ± 0.07 |
| <i>CMO281C</i> | Vacuolar protein sorting-associated protein Vps4p                                            | 0.89 ± 0.07 |
| <i>CMR213C</i> | Mitochondrial intermembrane space complex subunit Tim9                                       | 0.89 ± 0.13 |
| <i>CMN049C</i> | Similar to formin                                                                            | 0.89 ± 0.02 |
| <i>CMR038C</i> | Hypothetical protein                                                                         | 0.89 ± 0.07 |
| <i>CML144C</i> | Hypothetical protein                                                                         | 0.89 ± 0.04 |
| <i>CMQ175C</i> | Mitochondrial ribosomal protein S9 precursor                                                 | 0.89 ± 0.02 |
| <i>CMR033C</i> | Hypothetical protein                                                                         | 0.89 ± 0.03 |
| <i>CMQ225C</i> | 20S core proteasome subunit alpha 5                                                          | 0.89 ± 0.06 |
| <i>CMT166C</i> | Hypothetical protein                                                                         | 0.89 ± 0.03 |
| <i>CMO137C</i> | Probable DNA replication licensing factor MCM2                                               | 0.89 ± 0.03 |
| <i>CMR351C</i> | Hypothetical protein                                                                         | 0.89 ± 0.05 |
| <i>CML064C</i> | Hypothetical protein                                                                         | 0.89 ± 0.03 |
| <i>CMB004C</i> | 40S ribosomal protein S18                                                                    | 0.89 ± 0.06 |
| <i>CMA091C</i> | Hypothetical protein                                                                         | 0.89 ± 0.05 |
| <i>CMR204C</i> | Hypothetical protein                                                                         | 0.89 ± 0.10 |
| <i>CMD044C</i> | Hypothetical protein                                                                         | 0.89 ± 0.06 |

|                |                                                                   |             |
|----------------|-------------------------------------------------------------------|-------------|
| <i>CMA011C</i> | Probable aminoacylase I                                           | 0.89 ± 0.06 |
| <i>CMB085C</i> | Hypothetical protein                                              | 0.89 ± 0.13 |
| <i>CME058C</i> | Hypothetical protein                                              | 0.89 ± 0.03 |
| <i>CMJ241C</i> | Hypothetical protein                                              | 0.89 ± 0.06 |
| <i>CMM209C</i> | Hypothetical protein                                              | 0.89 ± 0.08 |
| <i>CMJ256C</i> | Hypothetical protein                                              | 0.89 ± 0.05 |
| <i>CMG169C</i> | Probable RNA polymerase II subunit I                              | 0.89 ± 0.08 |
| <i>CMQ018C</i> | Hypothetical protein                                              | 0.89 ± 0.07 |
| <i>CMH106C</i> | Hypothetical protein                                              | 0.89 ± 0.09 |
| <i>CMR077C</i> | Ubiquitin-protein ligase E3                                       | 0.89 ± 0.02 |
| <i>CMA103C</i> | Raf-related MAP kinase kinase kinase (MAP3K), theta-type          | 0.89 ± 0.11 |
| <i>CMA046C</i> | Hypothetical protein                                              | 0.89 ± 0.04 |
| <i>CMF108C</i> | Similar to cleavage stimulation factor subunit 2                  | 0.89 ± 0.05 |
| <i>CMT180C</i> | Manganese transport protein                                       | 0.89 ± 0.09 |
| <i>CML093C</i> | Similar to TPR (tetratricopeptide repeat) protein                 | 0.89 ± 0.03 |
| <i>CMM097C</i> | Hypothetical protein                                              | 0.89 ± 0.03 |
| <i>CMO189C</i> | Similar to ubiquinone biosynthesis protein COQ4                   | 0.89 ± 0.02 |
| <i>CMR462C</i> | Hypothetical protein                                              | 0.89 ± 0.04 |
| <i>CMG187C</i> | Hypothetical protein                                              | 0.89 ± 0.06 |
| <i>CMB154C</i> | Unknown alpha/beta hydrolase                                      | 0.89 ± 0.04 |
| <i>CMM222C</i> | Similar to mitochondrial carrier protein                          | 0.89 ± 0.05 |
| <i>CMJ276C</i> | Hypothetical protein                                              | 0.89 ± 0.08 |
| <i>CMQ457C</i> | Raf-related MAP kinase kinase kinase (MAP3K), delta-type          | 0.89 ± 0.02 |
| <i>CMT437C</i> | Hypothetical protein                                              | 0.89 ± 0.04 |
| <i>CMS387C</i> | Similar to PRIP-interacting protein with methyltransferase domain | 0.89 ± 0.05 |
| <i>CM1288C</i> | Hypothetical protein                                              | 0.89 ± 0.02 |
| <i>CMO351C</i> | Hypothetical protein                                              | 0.89 ± 0.05 |
| <i>CMK256C</i> | Hypothetical protein                                              | 0.89 ± 0.10 |
| <i>CMQ332C</i> | Unknown heme-binding protein                                      | 0.89 ± 0.09 |
| <i>CMJ149C</i> | Hypothetical protein                                              | 0.89 ± 0.14 |
| <i>CMT218C</i> | Temperature sensitive supressor Bem46                             | 0.89 ± 0.09 |
| <i>CMQ182C</i> | Hypothetical protein                                              | 0.89 ± 0.04 |
| <i>CMK134C</i> | Hypothetical protein                                              | 0.89 ± 0.03 |
| <i>CMQ287C</i> | Hypothetical protein                                              | 0.89 ± 0.03 |
| <i>CMS383C</i> | Similar to methyl transferase                                     | 0.89 ± 0.05 |
| <i>CMO055C</i> | Unknown nucleotide sugar transporter                              | 0.89 ± 0.04 |
| <i>CMK156C</i> | Similar to rRNA methylase SpoU                                    | 0.89 ± 0.12 |
| <i>CMP122C</i> | Unknown kinase with aarF domain                                   | 0.89 ± 0.04 |
| <i>CMP280C</i> | Hypothetical protein                                              | 0.89 ± 0.02 |
| <i>CMS046C</i> | Hypothetical protein                                              | 0.89 ± 0.07 |
| <i>CMC052C</i> | Hypothetical protein                                              | 0.89 ± 0.09 |
| <i>CMM263C</i> | DNA topoisomerase                                                 | 0.89 ± 0.04 |
| <i>CMR191C</i> | Hypothetical protein                                              | 0.89 ± 0.08 |

|                |                                                                            |             |
|----------------|----------------------------------------------------------------------------|-------------|
| <i>CMR072C</i> | Hypothetical protein                                                       | 0.89 ± 0.07 |
| <i>CMQ237C</i> | V-type ATPase V1 subunit F                                                 | 0.89 ± 0.04 |
| <i>CMQ452C</i> | Hypothetical protein                                                       | 0.89 ± 0.07 |
| <i>CMQ168C</i> | Similar to glutathione-S-transferase                                       | 0.89 ± 0.08 |
| <i>CML080C</i> | Acyl-CoA dehydrogenase, mitochondrial precursor                            | 0.89 ± 0.02 |
| <i>CMR087C</i> | Hypothetical protein                                                       | 0.89 ± 0.06 |
| <i>CMC150C</i> | Cytosolic ascorbate hydrogen peroxidase                                    | 0.89 ± 0.08 |
| <i>CMF169C</i> | Hypothetical protein                                                       | 0.89 ± 0.03 |
| <i>CMP007C</i> | 40S ribosomal protein S16                                                  | 0.89 ± 0.03 |
| <i>CMF114C</i> | Probable calcium/calmodulin-dependent protein kinase kinase                | 0.89 ± 0.04 |
| <i>CMA070C</i> | Hypothetical protein                                                       | 0.89 ± 0.12 |
| <i>CMM229C</i> | 3-isopropylmalate dehydrogenase                                            | 0.89 ± 0.15 |
| <i>CMP057C</i> | Hypothetical protein                                                       | 0.89 ± 0.07 |
| <i>CMH092C</i> | Hypothetical protein                                                       | 0.89 ± 0.08 |
| <i>CMQ038C</i> | Similar to ubiquitin conjugating enzyme E2                                 | 0.89 ± 0.03 |
| <i>CMS124C</i> | Valosin-containing protein                                                 | 0.89 ± 0.02 |
| <i>CMM078C</i> | Similar to Gbp1p protein                                                   | 0.89 ± 0.09 |
| <i>CMP235C</i> | Probable arsenite translocating ATPase                                     | 0.89 ± 0.08 |
| <i>CML128C</i> | tRNA nucleotidyltransferase                                                | 0.89 ± 0.12 |
| <i>CMS189C</i> | 40S ribosomal protein S3A                                                  | 0.89 ± 0.03 |
| <i>CMM036C</i> | Hypothetical protein                                                       | 0.89 ± 0.03 |
| <i>CMG180C</i> | Similar to key negative regulator of the Notch pathway SEL1L               | 0.89 ± 0.07 |
| <i>CMJ080C</i> | Similar to tRNA modification enzyme Trm5                                   | 0.89 ± 0.10 |
| <i>CMC125C</i> | Heat shock protein 101                                                     | 0.89 ± 0.12 |
| <i>CMQ210C</i> | Chorismate mutase                                                          | 0.89 ± 0.08 |
| <i>CMA132C</i> | Unknown metallopeptidase                                                   | 0.89 ± 0.06 |
| <i>CMC067C</i> | Hypothetical protein                                                       | 0.89 ± 0.09 |
| <i>CMK144C</i> | Hypothetical protein                                                       | 0.89 ± 0.06 |
| <i>CMS248C</i> | DEAD/H box protein                                                         | 0.89 ± 0.17 |
| <i>CMM080C</i> | Similar to trefoil factor                                                  | 0.89 ± 0.07 |
| <i>CMR487C</i> | Hypothetical protein                                                       | 0.89 ± 0.03 |
| <i>CMO341C</i> | Similar to protease                                                        | 0.89 ± 0.09 |
| <i>CMT284C</i> | Similar to permease involved in the uptake of glycerophosphoinositol Git1p | 0.89 ± 0.06 |
| <i>CMH073C</i> | Hypothetical protein                                                       | 0.89 ± 0.03 |
| <i>CMF057C</i> | Hypothetical protein                                                       | 0.89 ± 0.09 |
| <i>CMP102C</i> | Hypothetical protein                                                       | 0.89 ± 0.03 |
| <i>CMI205C</i> | 60S ribosomal protein L24                                                  | 0.89 ± 0.05 |
| <i>CMK181C</i> | Hypothetical protein                                                       | 0.89 ± 0.04 |
| <i>CMA079C</i> | Similar to actin-binding protein frabin                                    | 0.89 ± 0.04 |
| <i>CMP155C</i> | Hypothetical protein                                                       | 0.88 ± 0.03 |
| <i>CMJ139C</i> | Tyrosine--tRNA ligase                                                      | 0.88 ± 0.12 |
| <i>CMJ050C</i> | Hypothetical protein                                                       | 0.88 ± 0.06 |
| <i>CMP291C</i> | Hypothetical protein                                                       | 0.88 ± 0.09 |

|                |                                                                           |             |
|----------------|---------------------------------------------------------------------------|-------------|
| <i>CMT498C</i> | Hypothetical protein                                                      | 0.88 ± 0.07 |
| <i>CMB071C</i> | Bromodomain protein 103                                                   | 0.88 ± 0.04 |
| <i>CMO163C</i> | Similar to initiator tRNA phosphoribosyl-transferase                      | 0.88 ± 0.14 |
| <i>CMI261C</i> | Hypothetical protein                                                      | 0.88 ± 0.12 |
| <i>CMP236C</i> | Hypothetical protein                                                      | 0.88 ± 0.07 |
| <i>CMS488C</i> | Similar to glucose-6-phosphate/phosphate translocator                     | 0.88 ± 0.04 |
| <i>CMT328C</i> | Serine/threonine kinase KIN82                                             | 0.88 ± 0.03 |
| <i>CMQ059C</i> | Hypothetical protein                                                      | 0.88 ± 0.02 |
| <i>CMQ183C</i> | Hypothetical protein                                                      | 0.88 ± 0.06 |
| <i>CMS324C</i> | Hypothetical protein                                                      | 0.88 ± 0.03 |
| <i>CMK288C</i> | Probable potassium transporter                                            | 0.88 ± 0.09 |
| <i>CML087C</i> | Hypothetical protein                                                      | 0.88 ± 0.05 |
| <i>CME193C</i> | Hypothetical protein                                                      | 0.88 ± 0.08 |
| <i>CMK233C</i> | Hypothetical protein                                                      | 0.88 ± 0.05 |
| <i>CMP046C</i> | Probable mycolic acid methyl transferase                                  | 0.88 ± 0.09 |
| <i>CMF115C</i> | Hypothetical protein                                                      | 0.88 ± 0.03 |
| <i>CMG179C</i> | RNA polymerase III largest subunit                                        | 0.88 ± 0.08 |
| <i>CMR083C</i> | Similar to NADH:ubiquinone oxidoreductase b17.2 subunit                   | 0.88 ± 0.08 |
| <i>CMR374C</i> | Similar to RNA helicase with DEAD motif                                   | 0.88 ± 0.03 |
| <i>CMM154C</i> | Unknown metalloprotease                                                   | 0.88 ± 0.05 |
| <i>CMM031C</i> | Hypothetical protein                                                      | 0.88 ± 0.03 |
| <i>CMT467C</i> | Probable GDP-fucose transporter                                           | 0.88 ± 0.12 |
| <i>CMC032C</i> | Hypothetical protein                                                      | 0.88 ± 0.02 |
| <i>CMH248C</i> | Hypothetical protein                                                      | 0.88 ± 0.06 |
| <i>CMH019C</i> | Similar to UVB-resistance protein UVR8                                    | 0.88 ± 0.08 |
| <i>CMM221C</i> | Hypothetical protein                                                      | 0.88 ± 0.02 |
| <i>CMP335C</i> | Box C/D snoRNP and U4 snRNP component Snu13p                              | 0.88 ± 0.13 |
| <i>CMP275C</i> | Probable 24-sterol C-methyltransferase                                    | 0.88 ± 0.01 |
| <i>CMK151C</i> | Phytoene desaturase                                                       | 0.88 ± 0.06 |
| <i>CMF170C</i> | Vesicle coat complex COPII, subunit Sec23                                 | 0.88 ± 0.05 |
| <i>CMM245C</i> | Similar to RING finger-like protein                                       | 0.88 ± 0.02 |
| <i>CMR400C</i> | Unknown kinase with aarF domain                                           | 0.88 ± 0.02 |
| <i>CMM138C</i> | Similar to cyclin dependent kinase                                        | 0.88 ± 0.07 |
| <i>CMA124C</i> | Probable cell division protein glsA                                       | 0.88 ± 0.08 |
| <i>CMS026C</i> | Hypothetical protein                                                      | 0.88 ± 0.04 |
| <i>CMQ185C</i> | Box C/D snoRNP component Nop56                                            | 0.88 ± 0.15 |
| <i>CMT608C</i> | SEC14 protein (PI/PC transfer protein)                                    | 0.88 ± 0.08 |
| <i>CMI139C</i> | Hypothetical protein                                                      | 0.88 ± 0.06 |
| <i>CMT368C</i> | Similar to oxygen-evolving complex component psbP                         | 0.88 ± 0.08 |
| <i>CMG043C</i> | Tryptophane--tRNA ligase, cytoplasmic                                     | 0.88 ± 0.02 |
| <i>CMG152C</i> | Hypothetical protein                                                      | 0.88 ± 0.03 |
| <i>CMH063C</i> | Similar to Surfeit 1, a protein involved in cytochrome c oxidase assembly | 0.88 ± 0.05 |
| <i>CME030C</i> | Unknown RING finger protein                                               | 0.88 ± 0.15 |

|                |                                                                                                            |             |
|----------------|------------------------------------------------------------------------------------------------------------|-------------|
| <i>CMQ264C</i> | Glycerol-3-phosphate transporter                                                                           | 0.88 ± 0.14 |
| <i>CMS117C</i> | Similar to alpha-1,2 glucosyltransferase                                                                   | 0.88 ± 0.02 |
| <i>CMD084C</i> | Chloroplast translation initiation factor IF-1                                                             | 0.88 ± 0.04 |
| <i>CMK033C</i> | Hypothetical protein                                                                                       | 0.88 ± 0.08 |
| <i>CMP050C</i> | Hypothetical protein                                                                                       | 0.88 ± 0.10 |
| <i>CMQ035C</i> | Similar to exosome complex exonuclease RRP45                                                               | 0.88 ± 0.10 |
| <i>CML139C</i> | Hypothetical protein                                                                                       | 0.88 ± 0.03 |
| <i>CMM237C</i> | Actin                                                                                                      | 0.88 ± 0.03 |
| <i>CMC025C</i> | Succinyl-diaminopimelate desuccinylase                                                                     | 0.88 ± 0.06 |
| <i>CMJ230C</i> | Similar to GTPase activating protein                                                                       | 0.88 ± 0.03 |
| <i>CMG213C</i> | Probable proline dehydrogenase                                                                             | 0.88 ± 0.06 |
| <i>CMT470C</i> | Hypothetical protein                                                                                       | 0.88 ± 0.11 |
| <i>CMQ026C</i> | Ubiquitin carboxy-terminal hydrolase (UCH) L3                                                              | 0.88 ± 0.04 |
| <i>CMT273C</i> | Type II DNA topoisomerase VI subunit B                                                                     | 0.88 ± 0.04 |
| <i>CMO248C</i> | Hypothetical protein                                                                                       | 0.88 ± 0.03 |
| <i>CMI173C</i> | Hypothetical protein                                                                                       | 0.88 ± 0.05 |
| <i>CMI295C</i> | Phenylalanine--tRNA ligase alpha subunit                                                                   | 0.88 ± 0.07 |
| <i>CMR329C</i> | Similar to 67 kDa integral membrane protein; Rft1p                                                         | 0.88 ± 0.09 |
| <i>CMQ236C</i> | Hypothetical protein                                                                                       | 0.88 ± 0.08 |
| <i>CMH164C</i> | Hypothetical protein                                                                                       | 0.88 ± 0.03 |
| <i>CMQ395C</i> | Proteasome regulatory particle subunit                                                                     | 0.88 ± 0.06 |
| <i>CMS416C</i> | ATP-dependent RNA helicase                                                                                 | 0.88 ± 0.03 |
| <i>CMH238C</i> | Similar to glucose-6-phosphate/phosphate translocator                                                      | 0.88 ± 0.17 |
| <i>CMI062C</i> | Hypothetical protein                                                                                       | 0.88 ± 0.01 |
| <i>CMT561C</i> | Aconitate hydratase                                                                                        | 0.88 ± 0.02 |
| <i>CMM143C</i> | Hypothetical protein                                                                                       | 0.88 ± 0.03 |
| <i>CMR159C</i> | Similar to COP9 signalosome subunit Csn2                                                                   | 0.88 ± 0.06 |
| <i>CMA001C</i> | Similar to trefoil factor                                                                                  | 0.88 ± 0.07 |
| <i>CMS221C</i> | Similar to nuclear receptor binding factor 1                                                               | 0.88 ± 0.05 |
| <i>CML302C</i> | Hypothetical protein                                                                                       | 0.88 ± 0.06 |
| <i>CMO070C</i> | Kinesin-related protein                                                                                    | 0.88 ± 0.05 |
| <i>CMJ029C</i> | Hypothetical protein                                                                                       | 0.88 ± 0.07 |
| <i>CMT169C</i> | Methionyl aminopeptidase                                                                                   | 0.88 ± 0.09 |
| <i>CMR490C</i> | Hypothetical protein                                                                                       | 0.88 ± 0.01 |
| <i>CMR380C</i> | Fusion protein of glyoxysomal fatty acid oxidation tetrafunctional protein, and acetyl-CoA acyltransferase | 0.88 ± 0.03 |
| <i>CMO018C</i> | Ubiquitin carboxy-terminal hydrolase (UCH) L5                                                              | 0.88 ± 0.06 |
| <i>CMR359C</i> | Hypothetical protein                                                                                       | 0.88 ± 0.07 |
| <i>CMF104C</i> | Similar to Tsi1-interacting protein TSIP1                                                                  | 0.88 ± 0.05 |
| <i>CMP099C</i> | Hypothetical protein                                                                                       | 0.88 ± 0.04 |
| <i>CML079C</i> | Valine-pyruvate transaminase                                                                               | 0.88 ± 0.05 |
| <i>CMB039C</i> | Hypothetical protein                                                                                       | 0.88 ± 0.04 |
| <i>CMT093C</i> | Shikimate kinase                                                                                           | 0.88 ± 0.05 |
| <i>CMQ312C</i> | Hypothetical protein                                                                                       | 0.88 ± 0.05 |

|                |                                                                       |             |
|----------------|-----------------------------------------------------------------------|-------------|
| <i>CMG131C</i> | Hypothetical protein                                                  | 0.88 ± 0.05 |
| <i>CMK166C</i> | Glucosamine--fructose-6-phosphate aminotransferase                    | 0.88 ± 0.03 |
| <i>CMM214C</i> | Hypothetical protein                                                  | 0.88 ± 0.08 |
| <i>CME024C</i> | DNA-directed RNA polymerase I subunit                                 | 0.88 ± 0.02 |
| <i>CMM282C</i> | Rub1-activating enzyme E1 C subunit                                   | 0.88 ± 0.10 |
| <i>CMQ098C</i> | DNA polymerase epsilon homolog                                        | 0.88 ± 0.08 |
| <i>CMB102C</i> | Hypothetical protein                                                  | 0.87 ± 0.08 |
| <i>CMH131C</i> | Similar to basal transcription factor ABT1                            | 0.87 ± 0.01 |
| <i>CMS119C</i> | Similar to Stat3-interacting protein                                  | 0.87 ± 0.08 |
| <i>CMM093C</i> | Hypothetical protein                                                  | 0.87 ± 0.04 |
| <i>CMR027C</i> | Hypothetical protein                                                  | 0.87 ± 0.04 |
| <i>CMT054C</i> | Hypothetical protein                                                  | 0.87 ± 0.03 |
| <i>CMT151C</i> | Similar to triacylglycerol lipase                                     | 0.87 ± 0.05 |
| <i>CMO173C</i> | Similar to Raf-related MAP kinase kinase kinase (MAP3K)               | 0.87 ± 0.04 |
| <i>CMF073C</i> | Probable high-affinity potassium transporter                          | 0.87 ± 0.03 |
| <i>CMQ176C</i> | ATP-binding cassette, sub-family B, member 7, mitochondrial precursor | 0.87 ± 0.03 |
| <i>CMJ037C</i> | Probable GTP-binding protein                                          | 0.87 ± 0.10 |
| <i>CMF142C</i> | Hypothetical protein                                                  | 0.87 ± 0.07 |
| <i>CMT068C</i> | Hypothetical protein                                                  | 0.87 ± 0.02 |
| <i>CMK081C</i> | TATA-box binding protein-associated factor 6                          | 0.87 ± 0.11 |
| <i>CMH153C</i> | Probable leucine aminopeptidase                                       | 0.87 ± 0.03 |
| <i>CMS472C</i> | Hypothetical protein                                                  | 0.87 ± 0.04 |
| <i>CMB113C</i> | Hypothetical protein                                                  | 0.87 ± 0.10 |
| <i>CMT083C</i> | Similar to uridine-monophosphate kinase (uridylate kinase); Ura6p     | 0.87 ± 0.03 |
| <i>CMK090C</i> | Hypothetical protein                                                  | 0.87 ± 0.08 |
| <i>CMQ133C</i> | Probable CLC-type chloride channel                                    | 0.87 ± 0.05 |
| <i>CMJ237C</i> | Hypothetical protein                                                  | 0.87 ± 0.21 |
| <i>CMR312C</i> | Hypothetical protein                                                  | 0.87 ± 0.06 |
| <i>CMS492C</i> | Hypothetical protein                                                  | 0.87 ± 0.01 |
| <i>CMF083C</i> | Adaptor-related protein complex 1, gamma subunit                      | 0.87 ± 0.10 |
| <i>CMG155C</i> | Hypothetical protein                                                  | 0.87 ± 0.09 |
| <i>CMM307C</i> | Similar to DNA binding protein, dead ringer                           | 0.87 ± 0.03 |
| <i>CML185C</i> | Serine protease                                                       | 0.87 ± 0.05 |
| <i>CMG166C</i> | Fructokinase                                                          | 0.87 ± 0.06 |
| <i>CMD133C</i> | ATP-binding cassette, sub-family C (MRP), member 2                    | 0.87 ± 0.05 |
| <i>CMQ222C</i> | Zn-dependent peptidase                                                | 0.87 ± 0.08 |
| <i>CMB093C</i> | Magnesium chelatase subunit H                                         | 0.87 ± 0.04 |
| <i>CMO106C</i> | Hypothetical protein                                                  | 0.87 ± 0.03 |
| <i>CMG167C</i> | Cell cycle controlling protein kinase RIO                             | 0.87 ± 0.04 |
| <i>CMA037C</i> | Hypothetical protein                                                  | 0.87 ± 0.08 |
| <i>CMP151C</i> | Unknown DNA-binding protein                                           | 0.87 ± 0.02 |
| <i>CMB072C</i> | Similar to cell polarity protein tea1p                                | 0.87 ± 0.05 |
| <i>CMO075C</i> | RNA polymerase III subunit                                            | 0.87 ± 0.04 |



|                |                                                                                         |             |
|----------------|-----------------------------------------------------------------------------------------|-------------|
| <i>CMIO44C</i> | Similar to vacuolar sorting protein SNF7                                                | 0.87 ± 0.04 |
| <i>CMO128C</i> | Transketolase                                                                           | 0.87 ± 0.11 |
| <i>CMO227C</i> | Hypothetical protein                                                                    | 0.87 ± 0.07 |
| <i>CMM037C</i> | Hypothetical protein                                                                    | 0.87 ± 0.08 |
| <i>CMN108C</i> | Similar to 60S ribosomal subunit biogenesis protein Nip7p                               | 0.87 ± 0.11 |
| <i>CMO187C</i> | Heat shock transcription factor                                                         | 0.87 ± 0.08 |
| <i>CMH005C</i> | Hypothetical protein                                                                    | 0.87 ± 0.04 |
| <i>CMK149C</i> | Hypothetical protein                                                                    | 0.87 ± 0.03 |
| <i>CMT249C</i> | Similar to S-M checkpoint control protein Rad4p                                         | 0.87 ± 0.06 |
| <i>CMK092C</i> | Hypothetical protein                                                                    | 0.87 ± 0.03 |
| <i>CMG133C</i> | Excinuclease ABC subunit B                                                              | 0.87 ± 0.07 |
| <i>CMS176C</i> | Hypothetical protein                                                                    | 0.87 ± 0.13 |
| <i>CMP136C</i> | Hypothetical protein                                                                    | 0.87 ± 0.10 |
| <i>CMK212C</i> | Similar to bromodomain containing transcription factor                                  | 0.87 ± 0.03 |
| <i>CMA080C</i> | Hypothetical protein                                                                    | 0.87 ± 0.06 |
| <i>CMD016C</i> | Hypothetical protein                                                                    | 0.87 ± 0.03 |
| <i>CMM009C</i> | Hypothetical protein                                                                    | 0.87 ± 0.03 |
| <i>CMR118C</i> | Similar to polynucleotide phosphorylase                                                 | 0.87 ± 0.15 |
| <i>CMT395C</i> | Methionyl aminopeptidase                                                                | 0.87 ± 0.06 |
| <i>CMP187C</i> | Hypothetical protein                                                                    | 0.87 ± 0.05 |
| <i>CMII98C</i> | Probable ubiquitin fusion degradation protein Ufd4p                                     | 0.87 ± 0.09 |
| <i>CMO115C</i> | Hypothetical protein                                                                    | 0.87 ± 0.06 |
| <i>CMB014C</i> | Similar to ubiquitin-conjugating enzyme E2                                              | 0.87 ± 0.06 |
| <i>CMD033C</i> | Similar to periplasmic alpha-amylase precursor                                          | 0.87 ± 0.05 |
| <i>CMR059C</i> | Hypothetical protein                                                                    | 0.87 ± 0.06 |
| <i>CMN256C</i> | Reverse transcriptase                                                                   | 0.87 ± 0.08 |
| <i>CMT265C</i> | Hypothetical protein                                                                    | 0.87 ± 0.03 |
| <i>CMP034C</i> | Hypothetical protein                                                                    | 0.87 ± 0.08 |
| <i>CMF040C</i> | Hypothetical protein                                                                    | 0.87 ± 0.02 |
| <i>CMO274C</i> | V-type ATPase V0 subunit d                                                              | 0.87 ± 0.07 |
| <i>CMQ228C</i> | Similar to intermediate filament binding protein, plectin (human), trichohyalin (sheep) | 0.87 ± 0.03 |
| <i>CMG039C</i> | Aspartyl aminopeptidase                                                                 | 0.87 ± 0.08 |
| <i>CMR361C</i> | Hypothetical protein                                                                    | 0.87 ± 0.11 |
| <i>CMD034C</i> | Hypothetical protein                                                                    | 0.87 ± 0.05 |
| <i>CMII30C</i> | Probable zinc protease                                                                  | 0.87 ± 0.06 |
| <i>CMT441C</i> | Hypothetical protein                                                                    | 0.87 ± 0.04 |
| <i>CMQ462C</i> | Hypothetical protein                                                                    | 0.87 ± 0.05 |
| <i>CMS497C</i> | Hypothetical protein                                                                    | 0.87 ± 0.04 |
| <i>CMP135C</i> | Hypothetical protein                                                                    | 0.87 ± 0.05 |
| <i>CMIO18C</i> | Similar to U3 snoRNP component Utp14p                                                   | 0.87 ± 0.08 |
| <i>CMF148C</i> | Hypothetical protein                                                                    | 0.87 ± 0.05 |
| <i>CMN130C</i> | Similar to chaperone protein DnaK                                                       | 0.87 ± 0.05 |
| <i>CMN233C</i> | Dihydrolipoamide S-acetyltransferase, chloroplast precursor                             | 0.87 ± 0.15 |

|                |                                                                                                           |             |
|----------------|-----------------------------------------------------------------------------------------------------------|-------------|
| <i>CMQ020C</i> | Hypothetical protein                                                                                      | 0.87 ± 0.10 |
| <i>CMC174C</i> | Hypothetical protein                                                                                      | 0.87 ± 0.05 |
| <i>CMG036C</i> | Similar to WD-repeat protein                                                                              | 0.87 ± 0.06 |
| <i>CMK260C</i> | Probable mitochondrial processing peptidase alpha subunit                                                 | 0.87 ± 0.05 |
| <i>CMQ295C</i> | Cell division protein FtsH                                                                                | 0.87 ± 0.07 |
| <i>CMQ415C</i> | Hypothetical protein                                                                                      | 0.87 ± 0.03 |
| <i>CMC075C</i> | Similar to cation efflux system protein (zinc/cadmium); Cef                                               | 0.87 ± 0.09 |
| <i>CMH154C</i> | 20S core proteasome subunit beta 1                                                                        | 0.87 ± 0.08 |
| <i>CMF048C</i> | Similar to E3 ubiquitin protein ligase Itch                                                               | 0.87 ± 0.04 |
| <i>CMK245C</i> | ATP phosphoribosyl transferase                                                                            | 0.87 ± 0.11 |
| <i>CMJ046C</i> | Similar to kinetoplast-associated protein                                                                 | 0.87 ± 0.07 |
| <i>CMO026C</i> | Hypothetical protein                                                                                      | 0.87 ± 0.03 |
| <i>CMT309C</i> | Zinc finger protein                                                                                       | 0.87 ± 0.03 |
| <i>CMS050C</i> | Hypothetical protein                                                                                      | 0.87 ± 0.10 |
| <i>CMS352C</i> | Diaminohydroxyphosphoribosylaminopyrimidine deaminase / 5-amino-6-(5-phosphoribosylamino)uracil reductase | 0.87 ± 0.09 |
| <i>CME132C</i> | Porphobilinogen deaminase                                                                                 | 0.87 ± 0.09 |
| <i>CMI079C</i> | ATP-binding cassette, sub-family G                                                                        | 0.87 ± 0.03 |
| <i>CMG042C</i> | Ubiquitin-specific protease                                                                               | 0.87 ± 0.06 |
| <i>CMR396C</i> | Hypothetical protein                                                                                      | 0.87 ± 0.09 |
| <i>CMD119C</i> | Hypothetical protein                                                                                      | 0.87 ± 0.06 |
| <i>CMQ011C</i> | Hypothetical protein                                                                                      | 0.87 ± 0.08 |
| <i>CMT471C</i> | UDP-glucose dehydrogenase                                                                                 | 0.87 ± 0.05 |
| <i>CMH170C</i> | Probable class II DNA photolyase                                                                          | 0.87 ± 0.03 |
| <i>CMM160C</i> | Similar to TFIIF subunit TFB2                                                                             | 0.87 ± 0.07 |
| <i>CMB030C</i> | Unknown WD repeat protein                                                                                 | 0.86 ± 0.08 |
| <i>CMC095C</i> | Hypothetical protein                                                                                      | 0.86 ± 0.06 |
| <i>CMH062C</i> | Hypothetical protein                                                                                      | 0.86 ± 0.05 |
| <i>CML240C</i> | Hypothetical protein                                                                                      | 0.86 ± 0.06 |
| <i>CMA045C</i> | Hypothetical protein                                                                                      | 0.86 ± 0.11 |
| <i>CMH055C</i> | Hypothetical protein                                                                                      | 0.86 ± 0.04 |
| <i>CMM145C</i> | Asparagine synthase (glutamine-hydrolysing)                                                               | 0.86 ± 0.14 |
| <i>CMJ238C</i> | Mitochondrial ribosomal protein L28 precursor                                                             | 0.86 ± 0.12 |
| <i>CMA129C</i> | Hypothetical protein                                                                                      | 0.86 ± 0.07 |
| <i>CMJ259C</i> | Hypothetical protein                                                                                      | 0.86 ± 0.08 |
| <i>CMS083C</i> | Similar to histone acetyltransferase; Hat1p                                                               | 0.86 ± 0.12 |
| <i>CMP349C</i> | Similar to RNA methyltransferase                                                                          | 0.86 ± 0.02 |
| <i>CMJ203C</i> | Similar to transposase                                                                                    | 0.86 ± 0.04 |
| <i>CMD018C</i> | Probable ubiquitin                                                                                        | 0.86 ± 0.03 |
| <i>CMG172C</i> | Similar to Glu-tRNA <sup>Gln</sup> amidotransferase subunit A                                             | 0.86 ± 0.02 |
| <i>CML213C</i> | Hypothetical protein                                                                                      | 0.86 ± 0.05 |
| <i>CMQ121C</i> | Hypothetical protein                                                                                      | 0.86 ± 0.08 |
| <i>CML168C</i> | Branched-chain alpha-keto acid decarboxylase E1 beta subunit                                              | 0.86 ± 0.04 |
| <i>CMH111C</i> | Similar to 4-hydroxybenzoyl-CoA thioesterase                                                              | 0.86 ± 0.05 |

|                |                                                                                                          |             |
|----------------|----------------------------------------------------------------------------------------------------------|-------------|
| <i>CMK097C</i> | Serine--tRNA ligase, chloroplast or mitochondrial                                                        | 0.86 ± 0.10 |
| <i>CMA089C</i> | Hypothetical protein                                                                                     | 0.86 ± 0.08 |
| <i>CMD182C</i> | Hypothetical protein                                                                                     | 0.86 ± 0.12 |
| <i>CMS065C</i> | Hypothetical protein                                                                                     | 0.86 ± 0.09 |
| <i>CMH127C</i> | Hypothetical protein                                                                                     | 0.86 ± 0.30 |
| <i>CMJ089C</i> | Similar to DNA Helicase                                                                                  | 0.86 ± 0.06 |
| <i>CMI167C</i> | Hypothetical protein                                                                                     | 0.86 ± 0.03 |
| <i>CMO083C</i> | Similar to processing protease                                                                           | 0.86 ± 0.08 |
| <i>CMO150C</i> | Hypothetical protein                                                                                     | 0.86 ± 0.04 |
| <i>CMO205C</i> | Hypothetical protein                                                                                     | 0.86 ± 0.04 |
| <i>CMJ136C</i> | Similar to poly(A)-binding protein dependent poly(A)-ribonuclease subunit                                | 0.86 ± 0.03 |
| <i>CMS372C</i> | Mitochondrial acyl carrier protein precursor, NADH-ubiquinone oxidoreductase (Complex I) 9.6 kDa subunit | 0.86 ± 0.05 |
| <i>CMT173C</i> | ATP-dependent RNA helicase                                                                               | 0.86 ± 0.09 |
| <i>CMD156C</i> | Coatomer protein complex, subunit alpha                                                                  | 0.86 ± 0.03 |
| <i>CMG210C</i> | Unknown zinc finger protein                                                                              | 0.86 ± 0.02 |
| <i>CMO328C</i> | Similar to sucrose transporter                                                                           | 0.86 ± 0.05 |
| <i>CMN155C</i> | Probable beta-alanine synthase, closer                                                                   | 0.86 ± 0.03 |
| <i>CMM254C</i> | Hypothetical protein                                                                                     | 0.86 ± 0.06 |
| <i>CMI298C</i> | Thioredoxin reductase (NADPH)                                                                            | 0.86 ± 0.05 |
| <i>CMG046C</i> | Hypothetical protein                                                                                     | 0.86 ± 0.09 |
| <i>CMB062C</i> | Isopentenyl-diphosphate delta isomerase                                                                  | 0.86 ± 0.03 |
| <i>CMR472C</i> | Hypothetical protein                                                                                     | 0.86 ± 0.09 |
| <i>CMP062C</i> | Similar to TGF beta receptor associated protein-1                                                        | 0.86 ± 0.07 |
| <i>CMR198C</i> | Similar to 3(2),5-bisphosphate nucleotidase                                                              | 0.86 ± 0.12 |
| <i>CML145C</i> | Mannose-1-phosphate guanylyltransferase                                                                  | 0.86 ± 0.05 |
| <i>CMG191C</i> | Hypothetical protein                                                                                     | 0.86 ± 0.09 |
| <i>CMS358C</i> | Chromatin-specific transcription elongation factor                                                       | 0.86 ± 0.04 |
| <i>CMO121C</i> | Transketolase                                                                                            | 0.86 ± 0.10 |
| <i>CMH109C</i> | Raptor                                                                                                   | 0.86 ± 0.07 |
| <i>CMS456C</i> | Hypothetical protein                                                                                     | 0.86 ± 0.08 |
| <i>CME116C</i> | Similar to (N6-adenosine)-methyltransferase                                                              | 0.86 ± 0.02 |
| <i>CMS091C</i> | Probable mitochondrial carrier protein                                                                   | 0.86 ± 0.08 |
| <i>CMT208C</i> | Hypothetical protein                                                                                     | 0.86 ± 0.04 |
| <i>CMH058C</i> | Eukaryotic translation initiation factor eIF-5                                                           | 0.86 ± 0.20 |
| <i>CMF084C</i> | Sm protein D1                                                                                            | 0.86 ± 0.04 |
| <i>CMT478C</i> | Hypothetical protein                                                                                     | 0.86 ± 0.01 |
| <i>CMB091C</i> | Similar to eukaryotic translation elongation factor 1 alpha (eEF-1a)                                     | 0.86 ± 0.07 |
| <i>CMT592C</i> | Similar to mitochondrial calcium-dependent solute carrier                                                | 0.86 ± 0.08 |
| <i>CMG053C</i> | Hypothetical protein                                                                                     | 0.86 ± 0.05 |
| <i>CMM233C</i> | SWI/SNF related, matrix associated, actin dependent regulator of chromatin, subfamily c                  | 0.86 ± 0.02 |
| <i>CMG193C</i> | Hypothetical protein                                                                                     | 0.86 ± 0.07 |
| <i>CMO140C</i> | Mitochondrial translation elongation factor G2 (EF-G2)                                                   | 0.86 ± 0.03 |
| <i>CMM098C</i> | Asparagine--tRNA ligase, cytoplasmic                                                                     | 0.86 ± 0.06 |

|                |                                                                       |             |
|----------------|-----------------------------------------------------------------------|-------------|
| <i>CMK259C</i> | Hypothetical protein                                                  | 0.86 ± 0.08 |
| <i>CMS500C</i> | Similar to cyclin H                                                   | 0.86 ± 0.07 |
| <i>CMJ051C</i> | NADP-dependent malic enzyme                                           | 0.86 ± 0.06 |
| <i>CMR267C</i> | Similar to U3 snoRNP-associated 55-kDa protein RRP9                   | 0.86 ± 0.13 |
| <i>CMS307C</i> | Hypothetical protein                                                  | 0.86 ± 0.06 |
| <i>CMO109C</i> | Pre-rRNA processing protein bystin                                    | 0.86 ± 0.09 |
| <i>CMT594C</i> | Hypothetical protein                                                  | 0.86 ± 0.03 |
| <i>CMS316C</i> | Similar to rotamase/parvulin-type peptidyl-prolyl cis-trans isomerase | 0.86 ± 0.06 |
| <i>CMO253C</i> | Similar to 22 kDa peroxisomal membrane protein                        | 0.86 ± 0.02 |
| <i>CMN180C</i> | Similar to methyl transferase                                         | 0.86 ± 0.05 |
| <i>CMK147C</i> | Similar to GTP pyrophosphokinase                                      | 0.86 ± 0.12 |
| <i>CME136C</i> | Dtdp-glucose 4,6-dehydratase                                          | 0.86 ± 0.08 |
| <i>CMA095C</i> | Similar to MADS box transcription enhancer factor                     | 0.86 ± 0.05 |
| <i>CMO229C</i> | Ribulose-5-phosphate 3-epimerase                                      | 0.86 ± 0.07 |
| <i>CMT075C</i> | Degp protease precursor                                               | 0.86 ± 0.05 |
| <i>CMJ203C</i> | Probable mitotic cyclin a2-type                                       | 0.86 ± 0.07 |
| <i>CML324C</i> | Similar to SUMO-1-specific protease                                   | 0.86 ± 0.07 |
| <i>CMR032C</i> | Hypothetical protein                                                  | 0.86 ± 0.02 |
| <i>CMM171C</i> | Hypothetical protein                                                  | 0.86 ± 0.02 |
| <i>CMR026C</i> | Probable DNA (cytosine-5)-methyltransferase 3                         | 0.86 ± 0.04 |
| <i>CMS187C</i> | Similar to TIA1 cytotoxic granule-associated RNA-binding protein      | 0.86 ± 0.03 |
| <i>CMR356C</i> | Hypothetical protein                                                  | 0.86 ± 0.11 |
| <i>CMK138C</i> | Hypothetical protein                                                  | 0.86 ± 0.10 |
| <i>CMC158C</i> | Unknown WD-repeat protein WDS                                         | 0.86 ± 0.08 |
| <i>CMJ090C</i> | Hypothetical protein                                                  | 0.86 ± 0.01 |
| <i>CMP139C</i> | Hypothetical protein                                                  | 0.86 ± 0.04 |
| <i>CMQ361C</i> | Hypothetical protein                                                  | 0.86 ± 0.01 |
| <i>CMC090C</i> | Hypothetical protein                                                  | 0.86 ± 0.08 |
| <i>CMP219C</i> | Alpha,alpha-Trehalose-phosphate synthase (UDP-forming)                | 0.86 ± 0.06 |
| <i>CMT586C</i> | Probable eukaryotic translation initiation factor eIF-2A              | 0.86 ± 0.03 |
| <i>CMG059C</i> | Hypothetical protein                                                  | 0.86 ± 0.06 |
| <i>CMJ253C</i> | Hypothetical protein                                                  | 0.86 ± 0.07 |
| <i>CMS247C</i> | Hypothetical protein                                                  | 0.86 ± 0.13 |
| <i>CMM127C</i> | Hypothetical protein                                                  | 0.86 ± 0.11 |
| <i>CMJ214C</i> | Hypothetical protein                                                  | 0.85 ± 0.04 |
| <i>CMH043C</i> | Unknown RNA-binding protein                                           | 0.85 ± 0.04 |
| <i>CMS064C</i> | Hypothetical protein                                                  | 0.85 ± 0.03 |
| <i>CMG136C</i> | Probable ubiquitin-conjugating enzyme E2                              | 0.85 ± 0.02 |
| <i>CMN100C</i> | Unknown hydrolase                                                     | 0.85 ± 0.02 |
| <i>CML111C</i> | Hypothetical protein                                                  | 0.85 ± 0.04 |
| <i>CMO090C</i> | Probable 3-phosphoinositide-dependent protein kinase                  | 0.85 ± 0.05 |
| <i>CMA074C</i> | Hypothetical protein                                                  | 0.85 ± 0.04 |
| <i>CMO197C</i> | 20S core proteasome subunit alpha 7                                   | 0.85 ± 0.01 |

|                |                                                                                                      |             |
|----------------|------------------------------------------------------------------------------------------------------|-------------|
| <i>CMIO35C</i> | Hypothetical protein                                                                                 | 0.85 ± 0.03 |
| <i>CMO232C</i> | Hypothetical protein                                                                                 | 0.85 ± 0.02 |
| <i>CMD170C</i> | Similar to methylthioadenosine phosphorylase mtaP                                                    | 0.85 ± 0.01 |
| <i>CMD006C</i> | Probable serine protease                                                                             | 0.85 ± 0.09 |
| <i>CMQ285C</i> | Hypothetical protein                                                                                 | 0.85 ± 0.02 |
| <i>CMS434C</i> | Hypothetical protein                                                                                 | 0.85 ± 0.09 |
| <i>CMH095C</i> | Similar to inositol monophosphatase                                                                  | 0.85 ± 0.05 |
| <i>CMQ319C</i> | Hypothetical protein                                                                                 | 0.85 ± 0.03 |
| <i>CMT177C</i> | Unknown kinase with aarF domain                                                                      | 0.85 ± 0.14 |
| <i>CMI110C</i> | Hypothetical protein                                                                                 | 0.85 ± 0.12 |
| <i>CMP053C</i> | Coatomer protein complex, subunit gamma                                                              | 0.85 ± 0.11 |
| <i>CMX007C</i> | Similar to dolichyl-phosphate-mannose:protein mannosyltransferase                                    | 0.85 ± 0.11 |
| <i>CMF094C</i> | Hypothetical protein                                                                                 | 0.85 ± 0.06 |
| <i>CMQ392C</i> | Hypothetical protein                                                                                 | 0.85 ± 0.08 |
| <i>CMM017C</i> | Dtdp-glucose 4,6-dehydratase                                                                         | 0.85 ± 0.03 |
| <i>CMP111C</i> | Similar to second and third steps of methylation pathway for phosphatidylcholine biosynthesis; Opi3p | 0.85 ± 0.09 |
| <i>CMN021C</i> | Similar to UDP-sugar transporter                                                                     | 0.85 ± 0.04 |
| <i>CMI126C</i> | Hypothetical protein                                                                                 | 0.85 ± 0.06 |
| <i>CMC159C</i> | Probable mitochondrial 2-oxoglutarate/malate carrier protein                                         | 0.85 ± 0.05 |
| <i>CMR322C</i> | Hypothetical protein                                                                                 | 0.85 ± 0.07 |
| <i>CMN195C</i> | Probable glycosylasparaginase precursor                                                              | 0.85 ± 0.10 |
| <i>CME001C</i> | Similar to trefoil factor                                                                            | 0.85 ± 0.04 |
| <i>CMS426C</i> | Hypothetical protein                                                                                 | 0.85 ± 0.00 |
| <i>CMM220C</i> | Hypothetical protein                                                                                 | 0.85 ± 0.09 |
| <i>CMT143C</i> | Similar to inorganic polyphosphate/ATP-NAD kinase                                                    | 0.85 ± 0.04 |
| <i>CMC180C</i> | Probable protein disulfide-isomerase                                                                 | 0.85 ± 0.07 |
| <i>CMR302C</i> | 20S core proteasome subunit alpha 3                                                                  | 0.85 ± 0.05 |
| <i>CMJ181C</i> | Probable diphthine synthase                                                                          | 0.85 ± 0.03 |
| <i>CMI267C</i> | Similar to L-isoaspartate (D-aspartate) O-methyltransferase                                          | 0.85 ± 0.08 |
| <i>CMN313C</i> | Similar to histone methyltransferase Set2p                                                           | 0.85 ± 0.07 |
| <i>CMD134C</i> | ATP-binding cassette, sub-family G                                                                   | 0.85 ± 0.09 |
| <i>CMT359C</i> | Hypothetical protein                                                                                 | 0.85 ± 0.04 |
| <i>CMO332C</i> | Similar to micrococcal nuclease, mitochondrial precursor                                             | 0.85 ± 0.05 |
| <i>CMI117C</i> | ATP-binding protein of ABC transporter                                                               | 0.85 ± 0.12 |
| <i>CMR465C</i> | Sulfate ABC transporter ATP-binding subunit cysA                                                     | 0.85 ± 0.07 |
| <i>CMK042C</i> | Hypothetical protein                                                                                 | 0.85 ± 0.13 |
| <i>CMQ238C</i> | Hypothetical protein                                                                                 | 0.85 ± 0.05 |
| <i>CMR220C</i> | DNA-directed RNA polymerase II largest subunit                                                       | 0.85 ± 0.05 |
| <i>CME159C</i> | Hypothetical protein                                                                                 | 0.85 ± 0.04 |
| <i>CMC054C</i> | Glycine--tRNA ligase                                                                                 | 0.85 ± 0.04 |
| <i>CMJ179C</i> | Similar to Nedd4 binding protein 1                                                                   | 0.85 ± 0.03 |
| <i>CMI294C</i> | Isoamylase                                                                                           | 0.85 ± 0.04 |
| <i>CMD148C</i> | ATP-binding cassette, sub-family B (MDR/TAP), member 1                                               | 0.85 ± 0.04 |

|                |                                                                       |             |
|----------------|-----------------------------------------------------------------------|-------------|
| <i>CMS369C</i> | Similar to translin-associated factor X                               | 0.85 ± 0.06 |
| <i>CMS036C</i> | Similar to syntaxin-binding protein, UNC-18 homolog                   | 0.85 ± 0.03 |
| <i>CMM270C</i> | Magnesium chelatase subunits I and D                                  | 0.85 ± 0.07 |
| <i>CMJ012C</i> | Hypothetical protein                                                  | 0.85 ± 0.06 |
| <i>CMJ030C</i> | Hypothetical protein                                                  | 0.85 ± 0.05 |
| <i>CMC120C</i> | 6-Phospho-gluconolactonase                                            | 0.85 ± 0.02 |
| <i>CMM172C</i> | Hypothetical protein                                                  | 0.85 ± 0.02 |
| <i>CMR046C</i> | Similar to COP9 signalosome subunit Csn12                             | 0.85 ± 0.02 |
| <i>CMP113C</i> | Hypothetical protein                                                  | 0.85 ± 0.01 |
| <i>CMF051C</i> | Probable calcium/calmodulin-dependent protein kinase                  | 0.85 ± 0.04 |
| <i>CMD186C</i> | Similar to small multidrug export protein qacE                        | 0.85 ± 0.04 |
| <i>CMI136C</i> | Similar to protein with DnaJ domain                                   | 0.85 ± 0.04 |
| <i>CMI103C</i> | Hypothetical protein                                                  | 0.85 ± 0.06 |
| <i>CMR160C</i> | Similar to polyadenylation factor I complex subunit FIP1              | 0.85 ± 0.02 |
| <i>CMD055C</i> | Similar to mitotic check point protein BUB2                           | 0.85 ± 0.09 |
| <i>CMT060C</i> | Hypothetical protein                                                  | 0.85 ± 0.09 |
| <i>CMI096C</i> | Hypothetical protein                                                  | 0.85 ± 0.08 |
| <i>CMF012C</i> | Phosphoenolpyruvate synthase                                          | 0.85 ± 0.05 |
| <i>CMP231C</i> | Similar to tetracycline resistance protein                            | 0.85 ± 0.05 |
| <i>CMM165C</i> | Similar to adenylyl cyclase-associated protein CAP2                   | 0.85 ± 0.06 |
| <i>CME128C</i> | 20S core proteasome subunit alpha 6                                   | 0.85 ± 0.05 |
| <i>CMJ083C</i> | Similar to midasin Mdn1p                                              | 0.85 ± 0.06 |
| <i>CMK274C</i> | Mitochondrial ribosomal protein S5 precursor                          | 0.85 ± 0.04 |
| <i>CML181C</i> | Hypothetical protein                                                  | 0.85 ± 0.13 |
| <i>CMK228C</i> | Mitochondrial translation initiation factor IF-2                      | 0.85 ± 0.03 |
| <i>CMP208C</i> | Hypothetical protein                                                  | 0.85 ± 0.04 |
| <i>CMP117C</i> | Block of proliferation 1                                              | 0.85 ± 0.04 |
| <i>CMB029C</i> | Similar to GATA transcription factor areB gamma                       | 0.85 ± 0.09 |
| <i>CMM202C</i> | Probable glycosyl hydrolase, family 31                                | 0.85 ± 0.03 |
| <i>CMQ132C</i> | Hypothetical protein                                                  | 0.85 ± 0.02 |
| <i>CMT280C</i> | Isoleucine--tRNA ligase, cytoplasmic                                  | 0.85 ± 0.03 |
| <i>CMS298C</i> | Hypothetical protein                                                  | 0.85 ± 0.10 |
| <i>CMG126C</i> | Similar to zinc finger protein                                        | 0.85 ± 0.08 |
| <i>CMQ123C</i> | Hypothetical protein                                                  | 0.85 ± 0.02 |
| <i>CMN131C</i> | Similar to monooxygenase                                              | 0.85 ± 0.09 |
| <i>CMP142C</i> | Similar to acyltransferase Tafazzin                                   | 0.85 ± 0.12 |
| <i>CMB120C</i> | Similar to rotamase/parvulin-type peptidyl-prolyl cis-trans isomerase | 0.85 ± 0.06 |
| <i>CMQ019C</i> | Hypothetical protein                                                  | 0.85 ± 0.06 |
| <i>CMD129C</i> | Similar to BRCA1-binding helicase-like protein BACH1                  | 0.85 ± 0.06 |
| <i>CMT461C</i> | Probable retinoblastoma-binding protein 2                             | 0.85 ± 0.05 |
| <i>CMR372C</i> | Hypothetical protein                                                  | 0.85 ± 0.06 |
| <i>CMN167C</i> | RIO-like serine/threonine protein kinase                              | 0.85 ± 0.06 |
| <i>CMB118C</i> | ATP citrate lyase                                                     | 0.85 ± 0.09 |

|                |                                                                                   |             |
|----------------|-----------------------------------------------------------------------------------|-------------|
| <i>CMM122C</i> | Similar to 3-oxoacyl-(acyl carrier protein) reductase                             | 0.85 ± 0.02 |
| <i>CML225C</i> | Probable 8-amino-7-oxononanoate synthase                                          | 0.85 ± 0.05 |
| <i>CMM055C</i> | Hypothetical protein                                                              | 0.85 ± 0.03 |
| <i>CMA016C</i> | Similar to transcription factor IIA large subunit                                 | 0.85 ± 0.09 |
| <i>CMP301C</i> | Mitochondrial ribosomal protein L36 precursor                                     | 0.85 ± 0.08 |
| <i>CMK088C</i> | Hypothetical protein                                                              | 0.85 ± 0.08 |
| <i>CMN075C</i> | Similar to DNA damage checkpoint kinase RAD3                                      | 0.84 ± 0.05 |
| <i>CMP123C</i> | V-type ATPase V1 subunit B                                                        | 0.84 ± 0.06 |
| <i>CMK031C</i> | Cytochrome c reductase (Complex III) subunit 7(VI)                                | 0.84 ± 0.07 |
| <i>CMK108C</i> | Probable dolichyl-diphosphooligosaccharide--protein glycosyltransferase           | 0.84 ± 0.09 |
| <i>CMS293C</i> | Hypothetical protein                                                              | 0.84 ± 0.04 |
| <i>CMT025C</i> | Probable exodeoxyribonuclease V, alpha subunit                                    | 0.84 ± 0.02 |
| <i>CMR067C</i> | Similar to vegetative incompatibility protein HET-E-1                             | 0.84 ± 0.06 |
| <i>CMS004C</i> | Plastid division protein FtsZ (AB032072)                                          | 0.84 ± 0.10 |
| <i>CMB116C</i> | Probable nuclear movement protein NudC                                            | 0.84 ± 0.06 |
| <i>CME143C</i> | Smt3-activating enzyme E1 C subunit                                               | 0.84 ± 0.05 |
| <i>CMD115C</i> | Hypothetical protein                                                              | 0.84 ± 0.01 |
| <i>CMT394C</i> | Similar to Sm-like protein LSm1                                                   | 0.84 ± 0.03 |
| <i>CMQ300C</i> | Mitochondrial peptide chain release factor RF-1                                   | 0.84 ± 0.05 |
| <i>CMB146C</i> | Conserved GTP-binding protein of unknown function (Nucleolar GTP-binding protein) | 0.84 ± 0.13 |
| <i>CMT479C</i> | Similar to transcription initiation factor TFIID, subunit TAF7                    | 0.84 ± 0.10 |
| <i>CMA027C</i> | Hypothetical protein                                                              | 0.84 ± 0.12 |
| <i>CMO283C</i> | Unknown ABC anion transporter                                                     | 0.84 ± 0.08 |
| <i>CML100C</i> | Nuclear receptor co-repressor/HDAC3 complex subunit                               | 0.84 ± 0.05 |
| <i>CMM102C</i> | Probable ATP-dependent DNA helicase                                               | 0.84 ± 0.02 |
| <i>CMP222C</i> | Probable ATP-dependent RNA helicase ROK1                                          | 0.84 ± 0.08 |
| <i>CMS480C</i> | Hypothetical protein                                                              | 0.84 ± 0.05 |
| <i>CMA062C</i> | Similar to DNA polymerase iota, RAD30                                             | 0.84 ± 0.06 |
| <i>CMJ088C</i> | Hypothetical protein                                                              | 0.84 ± 0.03 |
| <i>CMT102C</i> | Unknown aldo/keto reductase                                                       | 0.84 ± 0.05 |
| <i>CMO161C</i> | Hypothetical protein                                                              | 0.84 ± 0.07 |
| <i>CMP078C</i> | Probable beta-galactosidase                                                       | 0.84 ± 0.07 |
| <i>CMP112C</i> | 5-oxo-L-prolinase                                                                 | 0.84 ± 0.06 |
| <i>CMG161C</i> | Unknown kinase with aarF domain                                                   | 0.84 ± 0.04 |
| <i>CMP265C</i> | Eukaryotic translation initiation factor eIF-3 subunit 5                          | 0.84 ± 0.04 |
| <i>CMS154C</i> | Probable sodium/hydrogen antiporter                                               | 0.84 ± 0.09 |
| <i>CMR411C</i> | Hypothetical protein                                                              | 0.84 ± 0.06 |
| <i>CMN124C</i> | Hypothetical protein                                                              | 0.84 ± 0.05 |
| <i>CMT502C</i> | Hypothetical protein                                                              | 0.84 ± 0.04 |
| <i>CMT371C</i> | Small GTP-binding protein of Ras family                                           | 0.84 ± 0.06 |
| <i>CMO114C</i> | Hypothetical protein                                                              | 0.84 ± 0.04 |
| <i>CMB002C</i> | Probable splicing factor 3b subunit 1                                             | 0.84 ± 0.08 |
| <i>CMA041C</i> | UDP-glucose 4-epimerase                                                           | 0.84 ± 0.12 |

|                |                                                                                         |             |
|----------------|-----------------------------------------------------------------------------------------|-------------|
| <i>CMH116C</i> | Similar to indigoidine synthesis protein IdgA                                           | 0.84 ± 0.05 |
| <i>CMH020C</i> | Cleavage and polyadenylation specificity factor protein                                 | 0.84 ± 0.06 |
| <i>CML092C</i> | Hypothetical protein                                                                    | 0.84 ± 0.01 |
| <i>CMT484C</i> | Probable flavin-linked sulfhydryl oxidase ERV1                                          | 0.84 ± 0.02 |
| <i>CMS041C</i> | Probable ubiquitin-fusion degradation protein (ubiquitination factor E4B)               | 0.84 ± 0.05 |
| <i>CMJ111C</i> | Similar to ethylene-responsive transcription coactivator                                | 0.84 ± 0.01 |
| <i>CMN088C</i> | Hypothetical protein                                                                    | 0.84 ± 0.06 |
| <i>CMR435C</i> | Hypothetical protein                                                                    | 0.84 ± 0.04 |
| <i>CMO012C</i> | S-adenosylmethionine decarboxylase                                                      | 0.84 ± 0.13 |
| <i>CMA115C</i> | Hypothetical protein                                                                    | 0.84 ± 0.01 |
| <i>CMN182C</i> | Queuine tRNA-ribosyltransferase                                                         | 0.84 ± 0.03 |
| <i>CMA072C</i> | RNA helicase                                                                            | 0.84 ± 0.06 |
| <i>CMT629C</i> | Glutaredoxin type 1                                                                     | 0.84 ± 0.05 |
| <i>CMK243C</i> | Phosphatidylserine decarboxylase                                                        | 0.84 ± 0.03 |
| <i>CMP217C</i> | Probable NAD(P) dependent 3-beta-hydroxysteroid dehydrogenase                           | 0.84 ± 0.05 |
| <i>CMH278C</i> | Hypothetical protein                                                                    | 0.84 ± 0.06 |
| <i>CMS054C</i> | Hypothetical protein                                                                    | 0.84 ± 0.12 |
| <i>CMS463C</i> | Similar to serine/threonine protein kinase                                              | 0.84 ± 0.03 |
| <i>CMT472C</i> | Similar to FKBP-type peptidyl-prolyl cis-trans isomerase                                | 0.84 ± 0.03 |
| <i>CMS199C</i> | U3 snoRNP component PWP2                                                                | 0.84 ± 0.06 |
| <i>CMS057C</i> | Hypothetical protein                                                                    | 0.84 ± 0.06 |
| <i>CMJ074C</i> | Probable carbon catabolite repressor Ccr4p                                              | 0.84 ± 0.08 |
| <i>CMH014C</i> | Cysteine desulfurase for iron-sulfur cluster formation sufS                             | 0.84 ± 0.05 |
| <i>CMR049C</i> | Similar to nucleolar complex Nop3                                                       | 0.84 ± 0.04 |
| <i>CMK068C</i> | Hypothetical protein                                                                    | 0.84 ± 0.11 |
| <i>CMT590C</i> | CDK tyrosine kinase WEE1                                                                | 0.84 ± 0.05 |
| <i>CMD083C</i> | Probable serine/threonine protein phosphatase                                           | 0.84 ± 0.03 |
| <i>CMS062C</i> | Similar to chromosome segregation protein SepB                                          | 0.84 ± 0.05 |
| <i>CML231C</i> | Similar to multidrug resistance protein                                                 | 0.84 ± 0.12 |
| <i>CMJ200C</i> | SWI/SNF related, matrix associated, actin dependent regulator of chromatin, subfamily a | 0.84 ± 0.18 |
| <i>CME121C</i> | Probable kynurenine aminotransferase                                                    | 0.84 ± 0.09 |
| <i>CMS418C</i> | Hypothetical protein                                                                    | 0.84 ± 0.12 |
| <i>CMS224C</i> | Hypothetical protein                                                                    | 0.84 ± 0.05 |
| <i>CMG211C</i> | Lipid-A-disaccharide synthase                                                           | 0.84 ± 0.05 |
| <i>CMT635C</i> | Hypothetical protein                                                                    | 0.84 ± 0.03 |
| <i>CMQ206C</i> | Hypothetical protein                                                                    | 0.84 ± 0.08 |
| <i>CMQ379C</i> | Probable Ca <sup>2+</sup> -transporting ATPase                                          | 0.84 ± 0.03 |
| <i>CMG142C</i> | Similar to DNA-(apurinic or apyrimidinic site) lyase ARP                                | 0.84 ± 0.03 |
| <i>CMQ013C</i> | Hypothetical protein                                                                    | 0.84 ± 0.09 |
| <i>CMO337C</i> | Similar to J-domain protein D3                                                          | 0.84 ± 0.05 |
| <i>CMR091C</i> | Probable signal recognition particle targeting component SRP19                          | 0.84 ± 0.11 |
| <i>CMT341C</i> | Similar to RNA binding protein                                                          | 0.84 ± 0.09 |
| <i>CMP325C</i> | Hypothetical protein                                                                    | 0.84 ± 0.05 |



|                |                                                                      |             |
|----------------|----------------------------------------------------------------------|-------------|
| <i>CM1236C</i> | Unknown WD-repeat protein                                            | 0.84 ± 0.13 |
| <i>CMX009C</i> | Hypothetical protein                                                 | 0.84 ± 0.04 |
| <i>CMS185C</i> | Probable actin-related protein Arp6                                  | 0.84 ± 0.01 |
| <i>CMQ433C</i> | Hypothetical protein                                                 | 0.84 ± 0.02 |
| <i>CMT387C</i> | Hypothetical protein                                                 | 0.84 ± 0.06 |
| <i>CMT098C</i> | Probable ubiquitin isopeptidase T                                    | 0.84 ± 0.07 |
| <i>CMP065C</i> | DNA excision repair protein ERCC2/XPD                                | 0.84 ± 0.06 |
| <i>CMF163C</i> | Similar to heterogeneous nuclear ribonucleoprotein H3, isoform a     | 0.84 ± 0.03 |
| <i>CMF123C</i> | Similar to maleylacetoacetate isomerase                              | 0.84 ± 0.04 |
| <i>CMT261C</i> | Similar to Pfam GTP-CDC domain protein                               | 0.84 ± 0.03 |
| <i>CML311C</i> | Hypothetical protein                                                 | 0.84 ± 0.08 |
| <i>CMN210C</i> | Eukaryotic translation initiation factor eIF-2 alpha subunit         | 0.84 ± 0.02 |
| <i>CM1014C</i> | Hypothetical protein                                                 | 0.84 ± 0.03 |
| <i>CMH163C</i> | Hypothetical protein                                                 | 0.84 ± 0.14 |
| <i>CMS460C</i> | Similar to endo-beta-N-acetylglucosaminidase                         | 0.84 ± 0.05 |
| <i>CM1263C</i> | Similar to atrer1a (Arabidopsis)                                     | 0.84 ± 0.05 |
| <i>CMS009C</i> | Hypothetical protein                                                 | 0.84 ± 0.07 |
| <i>CMK127C</i> | Hypothetical protein                                                 | 0.84 ± 0.05 |
| <i>CMD077C</i> | Similar to methionine--tRNA ligase, partial                          | 0.84 ± 0.03 |
| <i>CM1234C</i> | Similar to PABP1-dependent poly A-specific ribonuclease subunit PAN3 | 0.84 ± 0.07 |
| <i>CMT206C</i> | Hypothetical protein                                                 | 0.83 ± 0.08 |
| <i>CMT456C</i> | Hypothetical protein                                                 | 0.83 ± 0.02 |
| <i>CMT256C</i> | Pyruvate dehydrogenase E1 alpha subunit, mitochondrial precursor     | 0.83 ± 0.08 |
| <i>CMO144C</i> | Branched-chain-amino-acid transaminase                               | 0.83 ± 0.07 |
| <i>CMM125C</i> | CDP-diacylglycerol--Inositol 3-phosphatidyltransferase               | 0.83 ± 0.07 |
| <i>CMJ027C</i> | Glycerol-3-phosphate O-acyltransferase                               | 0.83 ± 0.03 |
| <i>CMA029C</i> | Hypothetical protein                                                 | 0.83 ± 0.03 |
| <i>CMR362C</i> | Hypothetical protein                                                 | 0.83 ± 0.05 |
| <i>CMR428C</i> | Similar to telomere-binding protein alpha subunit (TEBP alpha)       | 0.83 ± 0.08 |
| <i>CMT363C</i> | Similar to glycogenin-interacting protein                            | 0.83 ± 0.04 |
| <i>CMM276C</i> | Hypothetical protein                                                 | 0.83 ± 0.01 |
| <i>CMJ126C</i> | Hypothetical protein                                                 | 0.83 ± 0.09 |
| <i>CMK297C</i> | Probable ribonuclease HI large subunit                               | 0.83 ± 0.11 |
| <i>CMF035C</i> | Hypothetical protein                                                 | 0.83 ± 0.08 |
| <i>CMG164C</i> | Hypothetical protein                                                 | 0.83 ± 0.05 |
| <i>CMQ356C</i> | Hypothetical protein                                                 | 0.83 ± 0.06 |
| <i>CMN141C</i> | Hypothetical protein                                                 | 0.83 ± 0.06 |
| <i>CML197C</i> | Probable long-chain fatty acid coenzyme A ligase                     | 0.83 ± 0.04 |
| <i>CMO200C</i> | Similar to nucleolar ribosome transport complex component Noc2p      | 0.83 ± 0.09 |
| <i>CMO324C</i> | 4-amino-4-deoxychorismate (ADC) synthase                             | 0.83 ± 0.04 |
| <i>CMR410C</i> | Similar to translational repressor pumilio                           | 0.83 ± 0.06 |
| <i>CMK199C</i> | MutS family DNA mismatch repair protein MSH4                         | 0.83 ± 0.03 |
| <i>CMC126C</i> | Similar to PRLI-interacting factor N                                 | 0.83 ± 0.15 |

|                |                                                          |             |
|----------------|----------------------------------------------------------|-------------|
| <i>CMM320C</i> | Hypothetical protein                                     | 0.83 ± 0.12 |
| <i>CMT300C</i> | Similar to origin recognition complex subunit 4          | 0.83 ± 0.07 |
| <i>CMH049C</i> | Unknown homeobox protein                                 | 0.83 ± 0.03 |
| <i>CMM317C</i> | Similar to glycogen synthase                             | 0.83 ± 0.10 |
| <i>CMM242C</i> | Hypothetical protein                                     | 0.83 ± 0.08 |
| <i>CMQ161C</i> | Hypothetical protein                                     | 0.83 ± 0.05 |
| <i>CMT316C</i> | Apospory-associated protein C                            | 0.83 ± 0.07 |
| <i>CMI286C</i> | Hypothetical protein                                     | 0.83 ± 0.04 |
| <i>CMN091C</i> | Similar to iron-sulfur cluster-binding protein           | 0.83 ± 0.08 |
| <i>CMO348C</i> | Cryptochrome                                             | 0.83 ± 0.07 |
| <i>CMK015C</i> | Similar to protein disulfide isomerase                   | 0.83 ± 0.04 |
| <i>CMT375C</i> | Hypothetical protein                                     | 0.83 ± 0.07 |
| <i>CMJ301C</i> | 2-hydroxyhepta-2,4-diene-1,7-dioate isomerase            | 0.83 ± 0.10 |
| <i>CMD088C</i> | Hypothetical protein                                     | 0.83 ± 0.07 |
| <i>CMJ064C</i> | Hypothetical protein                                     | 0.83 ± 0.07 |
| <i>CMS012C</i> | Hypothetical protein                                     | 0.83 ± 0.01 |
| <i>CMM235C</i> | Hypothetical protein                                     | 0.83 ± 0.06 |
| <i>CMT576C</i> | Hypothetical protein                                     | 0.83 ± 0.04 |
| <i>CMQ267C</i> | Hypothetical protein                                     | 0.83 ± 0.08 |
| <i>CMP332C</i> | Similar to fibrillin                                     | 0.83 ± 0.04 |
| <i>CMI281C</i> | Cytochrome b6/f complex iron-sulfur subunit, precursor   | 0.83 ± 0.05 |
| <i>CMI270C</i> | Similar to carbonic anhydrase precursor                  | 0.83 ± 0.02 |
| <i>CMS452C</i> | Similar to TFIIH subunit TFB4                            | 0.83 ± 0.01 |
| <i>CMD168C</i> | Similar to elongin C                                     | 0.83 ± 0.03 |
| <i>CMN333C</i> | Phosphatidylinositol-4-phosphate 5-kinase                | 0.83 ± 0.02 |
| <i>CMQ256C</i> | Unknown cyanobacterial protein                           | 0.83 ± 0.08 |
| <i>CMI064C</i> | Hypothetical protein                                     | 0.83 ± 0.07 |
| <i>CMI242C</i> | Hypothetical protein                                     | 0.83 ± 0.08 |
| <i>CMH059C</i> | Similar to RNA polymerase I-associated factor PAF67      | 0.83 ± 0.05 |
| <i>CMQ275C</i> | Tyrosine--tRNA ligase, mitochondrial or chloroplast      | 0.83 ± 0.03 |
| <i>CMP087C</i> | Probable dehydrogenase                                   | 0.83 ± 0.05 |
| <i>CMH114C</i> | Similar to FKBP-type peptidyl-prolyl cis-trans isomerase | 0.83 ± 0.07 |
| <i>CMH182C</i> | Similar to ubiquitin specific protease                   | 0.83 ± 0.02 |
| <i>CMK087C</i> | Aspartate--tRNA ligase, mitochondrial and chloroplast?   | 0.83 ± 0.09 |
| <i>CMO155C</i> | Probable protein phosphatase 2A regulatory subunit       | 0.83 ± 0.03 |
| <i>CMF157C</i> | Probable U3 snoRNP component Utp7p                       | 0.83 ± 0.02 |
| <i>CMR460C</i> | Similar to transparent testa glabra 1                    | 0.83 ± 0.06 |
| <i>CMK179C</i> | Hypothetical protein                                     | 0.83 ± 0.06 |
| <i>CMJ248C</i> | Similar to cytochrome c-type biogenesis protein          | 0.83 ± 0.04 |
| <i>CMS412C</i> | Actin-like protein                                       | 0.83 ± 0.04 |
| <i>CML276C</i> | Chaperonin containing TCP1, subunit 5 (epsilon)          | 0.83 ± 0.16 |
| <i>CMQ008C</i> | Hypothetical protein                                     | 0.83 ± 0.01 |
| <i>CMH222C</i> | TATA-box binding protein-associated factor 11            | 0.83 ± 0.01 |

|                |                                                                  |             |
|----------------|------------------------------------------------------------------|-------------|
| <i>CMR031C</i> | Hypothetical protein                                             | 0.83 ± 0.05 |
| <i>CMR108C</i> | Hypothetical protein                                             | 0.83 ± 0.04 |
| <i>CMK280C</i> | MYB-related protein                                              | 0.83 ± 0.05 |
| <i>CMT440C</i> | Hypothetical protein                                             | 0.83 ± 0.04 |
| <i>CMJ239C</i> | Glucose-1-phosphate adenylyltransferase                          | 0.83 ± 0.05 |
| <i>CMQ443C</i> | Similar to alkane 1-monoxygenase                                 | 0.83 ± 0.02 |
| <i>CMG115C</i> | Hypothetical protein                                             | 0.83 ± 0.03 |
| <i>CMQ057C</i> | Hypothetical protein                                             | 0.83 ± 0.08 |
| <i>CMK203C</i> | Hypothetical protein                                             | 0.83 ± 0.04 |
| <i>CML279C</i> | Hypothetical protein                                             | 0.83 ± 0.06 |
| <i>CME092C</i> | Similar to ankirin                                               | 0.83 ± 0.01 |
| <i>CMF066C</i> | Glucose inhibited division protein A                             | 0.83 ± 0.06 |
| <i>CME059C</i> | Conserved unknown protein RtcB                                   | 0.83 ± 0.04 |
| <i>CMP089C</i> | Hypothetical protein                                             | 0.83 ± 0.04 |
| <i>CMC157C</i> | Kinesin-related protein, BimC subfamily                          | 0.83 ± 0.03 |
| <i>CMT389C</i> | Cystathionine gamma-lyase                                        | 0.83 ± 0.02 |
| <i>CMQ028C</i> | Adaptor-related protein complex 3, delta subunit                 | 0.83 ± 0.04 |
| <i>CMT406C</i> | Hypothetical protein                                             | 0.83 ± 0.03 |
| <i>CMQ227C</i> | Hypothetical protein                                             | 0.83 ± 0.05 |
| <i>CMN147C</i> | Actin depolymerizing factor                                      | 0.83 ± 0.09 |
| <i>CMC178C</i> | Hypothetical protein                                             | 0.83 ± 0.11 |
| <i>CMT421C</i> | Hypothetical protein                                             | 0.83 ± 0.04 |
| <i>CMP042C</i> | Similar to U3 snoRNP component Utp13p                            | 0.83 ± 0.04 |
| <i>CML086C</i> | Probable signal recognition particle targeting component SRP68   | 0.83 ± 0.04 |
| <i>CMM287C</i> | Similar to magnesium transporter Mrs2p                           | 0.83 ± 0.14 |
| <i>CMP067C</i> | UDP-3-O-[3-hydroxymyristoyl] glucosamine N-acyltransferase       | 0.83 ± 0.03 |
| <i>CMA059C</i> | Probable viral mRNA translation inhibitor SKI2                   | 0.83 ± 0.11 |
| <i>CMJ302C</i> | Hypothetical protein                                             | 0.83 ± 0.06 |
| <i>CMP075C</i> | Protein phosphatase 5                                            | 0.83 ± 0.08 |
| <i>CMP030C</i> | Probable chromatin assembly factor 1 subunit B                   | 0.83 ± 0.02 |
| <i>CME018C</i> | Hypothetical protein                                             | 0.83 ± 0.07 |
| <i>CMT600C</i> | Probable NAD-dependent histone deacetylase SIR2                  | 0.83 ± 0.05 |
| <i>CMS342C</i> | V-type ATPase V1 subunit A                                       | 0.83 ± 0.03 |
| <i>CMI048C</i> | Hypothetical protein                                             | 0.83 ± 0.04 |
| <i>CMG170C</i> | Proteasome regulatory particle subunit                           | 0.83 ± 0.07 |
| <i>CMD010C</i> | Hypothetical protein                                             | 0.83 ± 0.05 |
| <i>CMS037C</i> | Cystathionine beta-synthase                                      | 0.83 ± 0.05 |
| <i>CMN322C</i> | Hypothetical protein                                             | 0.83 ± 0.03 |
| <i>CMB057C</i> | Hypothetical protein                                             | 0.83 ± 0.01 |
| <i>CMM071C</i> | Hypothetical protein                                             | 0.83 ± 0.02 |
| <i>CMS256C</i> | Similar to transcriptional activator GCN5, a bromodomain protein | 0.83 ± 0.05 |
| <i>CMO072C</i> | Unknown WD-40 protein                                            | 0.83 ± 0.12 |
| <i>CMA111C</i> | Probable transitional endoplasmic reticulum ATPase               | 0.83 ± 0.04 |

|                |                                                                       |             |
|----------------|-----------------------------------------------------------------------|-------------|
| <i>CMT097C</i> | Kinesin-related protein, C-terminal motor subfamily                   | 0.83 ± 0.05 |
| <i>CMO225C</i> | Hypothetical protein                                                  | 0.83 ± 0.05 |
| <i>CMN234C</i> | Similar to chlorophyll a/b-binding protein, CP24                      | 0.83 ± 0.09 |
| <i>CMP220C</i> | Similar to actin-binding protein, profilin                            | 0.82 ± 0.04 |
| <i>CMO147C</i> | Unknown permease                                                      | 0.82 ± 0.06 |
| <i>CMQ187C</i> | Rad50                                                                 | 0.82 ± 0.05 |
| <i>CMF146C</i> | Similar to phosphate/phosphoenolpyruvate translocator precursor       | 0.82 ± 0.10 |
| <i>CMR456C</i> | Ribosomal RNA assembly protein mis3/dribble/Krr1p                     | 0.82 ± 0.07 |
| <i>CMN163C</i> | Similar to variable flagellar number protein                          | 0.82 ± 0.06 |
| <i>CMR144C</i> | Adaptor-related protein complex 1, sigma subunit                      | 0.82 ± 0.06 |
| <i>CMQ045C</i> | ATP-dependent Clp protease proteolytic subunit                        | 0.82 ± 0.04 |
| <i>CMD060C</i> | 20S core proteasome subunit beta 7                                    | 0.82 ± 0.02 |
| <i>CMM115C</i> | Similar to glycosyltransferase                                        | 0.82 ± 0.10 |
| <i>CMA134C</i> | Similar to phosphatidyl-N-methylethanolamine N-methyltransferase      | 0.82 ± 0.05 |
| <i>CMO102C</i> | Vacuolar-type H <sup>+</sup> -translocating inorganic pyrophosphatase | 0.82 ± 0.04 |
| <i>CMJ277C</i> | Hypothetical protein                                                  | 0.82 ± 0.05 |
| <i>CMF110C</i> | Probable replication factor C/activator 1 subunit                     | 0.82 ± 0.04 |
| <i>CMI073C</i> | Hypothetical protein                                                  | 0.82 ± 0.05 |
| <i>CMX001C</i> | Hypothetical protein                                                  | 0.82 ± 0.21 |
| <i>CMR317C</i> | Hypothetical protein                                                  | 0.82 ± 0.04 |
| <i>CMH132C</i> | Succinyl-CoA synthetase alpha chain                                   | 0.82 ± 0.04 |
| <i>CMQ077C</i> | Cleavage and polyadenylation specific factor 2, 100kDa subunit        | 0.82 ± 0.04 |
| <i>CMB075C</i> | Unknown transporter                                                   | 0.82 ± 0.09 |
| <i>CMP169C</i> | Similar to expression regulator of ATP synthase Nca2p                 | 0.82 ± 0.05 |
| <i>CMB010C</i> | Tryptophane--tRNA ligase, chloroplast or mitochondrial                | 0.82 ± 0.07 |
| <i>CMM190C</i> | Chloroplast ribosomal protein L17 precursor                           | 0.82 ± 0.02 |
| <i>CMN027C</i> | Probable chromosome segregation protein CSE1                          | 0.82 ± 0.07 |
| <i>CMC172C</i> | Hypothetical protein                                                  | 0.82 ± 0.05 |
| <i>CMQ375C</i> | Hypothetical protein                                                  | 0.82 ± 0.05 |
| <i>CMH057C</i> | Hypothetical protein                                                  | 0.82 ± 0.06 |
| <i>CMO003C</i> | Mannose-1-phosphate guanylyltransferase                               | 0.82 ± 0.04 |
| <i>CMP261C</i> | Similar to small conductance mechanosensitive ion channel             | 0.82 ± 0.03 |
| <i>CMT120C</i> | ABC transporter, LktB-related                                         | 0.82 ± 0.07 |
| <i>CMJ162C</i> | Similar to diacylglycerol acyltransferase type 2B                     | 0.82 ± 0.09 |
| <i>CMK164C</i> | Similar to mitochondrial carrier protein                              | 0.82 ± 0.04 |
| <i>CMT386C</i> | Hypothetical protein                                                  | 0.82 ± 0.06 |
| <i>CMT140C</i> | Hypothetical protein                                                  | 0.82 ± 0.03 |
| <i>CMO239C</i> | Hypothetical protein                                                  | 0.82 ± 0.09 |
| <i>CME119C</i> | Cyclin dependent kinase, A-type                                       | 0.82 ± 0.02 |
| <i>CMT462C</i> | DNA polymerase I (POL I)                                              | 0.82 ± 0.03 |
| <i>CMD042C</i> | Hypothetical protein                                                  | 0.82 ± 0.08 |
| <i>CME022C</i> | Hypothetical protein                                                  | 0.82 ± 0.05 |
| <i>CML290C</i> | Hypothetical protein                                                  | 0.82 ± 0.07 |

|                |                                                                                                 |             |
|----------------|-------------------------------------------------------------------------------------------------|-------------|
| <i>CMB157C</i> | S-adenosyl-L-homocysteine hydrolase                                                             | 0.82 ± 0.12 |
| <i>CMQ110C</i> | Similar to nuclear LIM interactor-interacting factor                                            | 0.82 ± 0.08 |
| <i>CMJ009C</i> | Cycloartenol synthase                                                                           | 0.82 ± 0.14 |
| <i>CMC122C</i> | Hypothetical protein                                                                            | 0.82 ± 0.04 |
| <i>CMI179C</i> | Probable fibronectin-binding protein                                                            | 0.82 ± 0.06 |
| <i>CMT513C</i> | Hypothetical protein                                                                            | 0.82 ± 0.05 |
| <i>CMF177C</i> | Similar to polymyositis-scleroderma overlap syndrome associated autoantigen                     | 0.82 ± 0.03 |
| <i>CMR090C</i> | Hypothetical protein                                                                            | 0.82 ± 0.05 |
| <i>CMH009C</i> | Probable adenosine deaminase                                                                    | 0.82 ± 0.09 |
| <i>CMC121C</i> | Phosphoglucomutase                                                                              | 0.82 ± 0.08 |
| <i>CMT094C</i> | Similar to 2-dehydropantoate 2-reductase                                                        | 0.82 ± 0.05 |
| <i>CMA034C</i> | Hypothetical protein                                                                            | 0.82 ± 0.08 |
| <i>CMP257C</i> | Hypothetical protein                                                                            | 0.82 ± 0.07 |
| <i>CMN288C</i> | Hypothetical protein                                                                            | 0.82 ± 0.14 |
| <i>CMF020C</i> | Probable NADPH-dependent FMN and FAD containing oxidoreductase, NADPH-cytochrome P450 reductase | 0.82 ± 0.03 |
| <i>CME016C</i> | Signal recognition particle (SRP) receptor alpha subunit                                        | 0.82 ± 0.01 |
| <i>CMS496C</i> | Hypothetical protein                                                                            | 0.82 ± 0.08 |
| <i>CMQ338C</i> | Similar to ATP-dependent RNA helicase dead                                                      | 0.82 ± 0.04 |
| <i>CMO078C</i> | Hypothetical protein                                                                            | 0.82 ± 0.10 |
| <i>CMK044C</i> | Sigma subunit for chloroplast RNA polymerase, precursor                                         | 0.82 ± 0.15 |
| <i>CMK086C</i> | Hypothetical protein                                                                            | 0.82 ± 0.03 |
| <i>CMS359C</i> | Similar to putative mitochondrial carrier protein                                               | 0.82 ± 0.08 |
| <i>CMH097C</i> | Hypothetical protein                                                                            | 0.82 ± 0.05 |
| <i>CMS384C</i> | MAP kinase kinase kinase (MAP3K), cdc15-like epsilon-type                                       | 0.82 ± 0.04 |
| <i>CMQ393C</i> | Chloroplast preprotein translocase SecA subunit                                                 | 0.82 ± 0.09 |
| <i>CMO045C</i> | Hypothetical protein                                                                            | 0.82 ± 0.09 |
| <i>CMC019C</i> | Vesicle transport protein Rop                                                                   | 0.82 ± 0.06 |
| <i>CMR370C</i> | Probable bile acid sodium symporter                                                             | 0.82 ± 0.12 |
| <i>CME156C</i> | Similar to mitochondrial ribosome small subunit component Rsm22                                 | 0.82 ± 0.04 |
| <i>CMM326C</i> | Serine/threonine-protein kinase IRE1                                                            | 0.82 ± 0.08 |
| <i>CMN304C</i> | Gamma-tubulin                                                                                   | 0.82 ± 0.05 |
| <i>CMJ257C</i> | Single subunit mitochondrial RNA polymerase                                                     | 0.82 ± 0.01 |
| <i>CMS134C</i> | Hypothetical protein                                                                            | 0.82 ± 0.04 |
| <i>CMR061C</i> | Hypothetical protein                                                                            | 0.82 ± 0.13 |
| <i>CME085C</i> | Probable XPA-binding protein 1                                                                  | 0.82 ± 0.08 |
| <i>CMS032C</i> | Similar to nuclear mitotic apparatus protein                                                    | 0.82 ± 0.12 |
| <i>CMP182C</i> | Hypothetical protein                                                                            | 0.82 ± 0.05 |
| <i>CMP077C</i> | Hypothetical protein                                                                            | 0.82 ± 0.05 |
| <i>CMA066C</i> | DNA repair protein SMC6                                                                         | 0.82 ± 0.07 |
| <i>CMR009C</i> | Probable Na <sup>+</sup> driven anion exchanger NDAE1                                           | 0.82 ± 0.11 |
| <i>CMJ015C</i> | Hypothetical protein                                                                            | 0.82 ± 0.03 |
| <i>CML319C</i> | Hypothetical protein                                                                            | 0.82 ± 0.01 |
| <i>CMT497C</i> | Glucose-6-phosphate isomerase                                                                   | 0.82 ± 0.03 |

|                |                                                                               |             |
|----------------|-------------------------------------------------------------------------------|-------------|
| <i>CMP116C</i> | Similar to transposase                                                        | 0.82 ± 0.03 |
| <i>CMC071C</i> | N-myristoyltransferase                                                        | 0.82 ± 0.04 |
| <i>CMR443C</i> | Hypothetical protein                                                          | 0.82 ± 0.04 |
| <i>CMR286C</i> | Hypothetical protein                                                          | 0.82 ± 0.04 |
| <i>CMA019C</i> | RNA polymerase III transcription factor IIIB                                  | 0.82 ± 0.03 |
| <i>CMT122C</i> | ATP-dependent Hsl protease ATP-binding subunit HslU, heat shock protein HslU  | 0.82 ± 0.02 |
| <i>CMT071C</i> | Methylcrotonyl-CoA carboxylase                                                | 0.82 ± 0.06 |
| <i>CMO350C</i> | Hypothetical protein                                                          | 0.81 ± 0.04 |
| <i>CMM260C</i> | Hypothetical protein                                                          | 0.81 ± 0.03 |
| <i>CMT563C</i> | Hypothetical protein                                                          | 0.81 ± 0.03 |
| <i>CML274C</i> | Betaine aldehyde dehydrogenase                                                | 0.81 ± 0.06 |
| <i>CMI091C</i> | Serine hydroxymethyltransferase, cytosolic (glycine hydroxymethyltransferase) | 0.81 ± 0.12 |
| <i>CMT185C</i> | Probable MAP kinase kinase kinase (MAP3K)                                     | 0.81 ± 0.09 |
| <i>CMI020C</i> | Hypothetical protein                                                          | 0.81 ± 0.06 |
| <i>CMH242C</i> | Oxysterol binding protein                                                     | 0.81 ± 0.06 |
| <i>CMF068C</i> | 2-oxoglutarate dehydrogenase, E1 component                                    | 0.81 ± 0.02 |
| <i>CMP193C</i> | Malate dehydrogenase, mitochondrial precursor                                 | 0.81 ± 0.13 |
| <i>CML166C</i> | Hypothetical protein                                                          | 0.81 ± 0.06 |
| <i>CMM065C</i> | Sm protein D3                                                                 | 0.81 ± 0.03 |
| <i>CML112C</i> | Hypothetical protein                                                          | 0.81 ± 0.05 |
| <i>CMH143C</i> | Hypothetical protein                                                          | 0.81 ± 0.04 |
| <i>CMO073C</i> | Hypothetical protein                                                          | 0.81 ± 0.03 |
| <i>CMJ296C</i> | Hypothetical protein                                                          | 0.81 ± 0.12 |
| <i>CMM166C</i> | Phytoene synthase                                                             | 0.81 ± 0.09 |
| <i>CMO059C</i> | Unknown heatshock protein                                                     | 0.81 ± 0.05 |
| <i>CMT325C</i> | Serine/threonine kinase 11                                                    | 0.81 ± 0.03 |
| <i>CMR398C</i> | Similar to dehydrogenase                                                      | 0.81 ± 0.04 |
| <i>CMR194C</i> | Hypothetical protein                                                          | 0.81 ± 0.06 |
| <i>CMP281C</i> | Similar to guanine nucleotide exchange factor                                 | 0.81 ± 0.08 |
| <i>CMG205C</i> | Hypothetical protein                                                          | 0.81 ± 0.03 |
| <i>CMI077C</i> | Probable mRNA-associated protein MRNP 41, RAE1 homolog                        | 0.81 ± 0.08 |
| <i>CMP216C</i> | CTP synthase                                                                  | 0.81 ± 0.08 |
| <i>CMR438C</i> | Hypothetical protein                                                          | 0.81 ± 0.02 |
| <i>CMN092C</i> | Similar to calcium-activated potassium channel                                | 0.81 ± 0.07 |
| <i>CMP297C</i> | Probable carboxyl-terminal protease                                           | 0.81 ± 0.06 |
| <i>CMS341C</i> | Puromycin-sensitive aminopeptidase                                            | 0.81 ± 0.06 |
| <i>CMG032C</i> | Hypothetical protein                                                          | 0.81 ± 0.07 |
| <i>CMT203C</i> | Similar to aspartyl protease                                                  | 0.81 ± 0.06 |
| <i>CMM182C</i> | Hypothetical protein                                                          | 0.81 ± 0.07 |
| <i>CMF055C</i> | GTP cyclohydrolase I                                                          | 0.81 ± 0.04 |
| <i>CMS030C</i> | Hypothetical protein                                                          | 0.81 ± 0.06 |
| <i>CMP356C</i> | DNA replication licensing factor MCM4                                         | 0.81 ± 0.11 |
| <i>CMD052C</i> | Hypothetical protein                                                          | 0.81 ± 0.02 |

|                |                                                                     |             |
|----------------|---------------------------------------------------------------------|-------------|
| <i>CMC060C</i> | Hypothetical protein                                                | 0.81 ± 0.07 |
| <i>CMT495C</i> | Similar to 5'-AMP-activated protein kinase, gamma-1 subunit         | 0.81 ± 0.06 |
| <i>CMK159C</i> | Hypothetical protein                                                | 0.81 ± 0.10 |
| <i>CMN223C</i> | Mitochondrial F-type ATPase F1 subunit epsilon, precursor           | 0.81 ± 0.07 |
| <i>CMH047C</i> | Similar to mRNA binding protein CSP41 precursor                     | 0.81 ± 0.02 |
| <i>CMN219C</i> | Hypothetical protein                                                | 0.81 ± 0.19 |
| <i>CMK230C</i> | Hypothetical protein                                                | 0.81 ± 0.03 |
| <i>CMG110C</i> | Probable phycocyanobilin:ferredoxin oxidoreductase                  | 0.81 ± 0.03 |
| <i>CMS400C</i> | Unknown ABC transporter permease subunit                            | 0.81 ± 0.02 |
| <i>CMQ374C</i> | Similar to chaperone DnaJ                                           | 0.81 ± 0.12 |
| <i>CMG073C</i> | Probable clathrin coat assembly protein AP180                       | 0.81 ± 0.02 |
| <i>CMO120C</i> | Hypothetical protein                                                | 0.81 ± 0.03 |
| <i>CMT267C</i> | Similar to glycosyl transferase                                     | 0.81 ± 0.06 |
| <i>CMT487C</i> | Similar to DNA cross-link repair protein SNM1                       | 0.81 ± 0.05 |
| <i>CMQ104C</i> | Hypothetical protein                                                | 0.81 ± 0.11 |
| <i>CME099C</i> | Histone H3 variant                                                  | 0.81 ± 0.02 |
| <i>CML103C</i> | Similar to splicing factor 3b subunit 3                             | 0.81 ± 0.08 |
| <i>CMR264C</i> | UV-damaged DNA binding protein                                      | 0.81 ± 0.15 |
| <i>CMO222C</i> | Hypothetical protein                                                | 0.81 ± 0.10 |
| <i>CMS292C</i> | Hypothetical protein                                                | 0.81 ± 0.04 |
| <i>CME102C</i> | Similar to GATA transcription factor                                | 0.81 ± 0.07 |
| <i>CMR045C</i> | Similar to protein phosphatase 1, regulatory (inhibitor) subunit 11 | 0.81 ± 0.08 |
| <i>CME014C</i> | Hypothetical protein                                                | 0.81 ± 0.04 |
| <i>CMS421C</i> | Hypothetical protein                                                | 0.81 ± 0.01 |
| <i>CMO181C</i> | Hypothetical protein                                                | 0.81 ± 0.01 |
| <i>CMB149C</i> | Hypothetical protein                                                | 0.81 ± 0.12 |
| <i>CMK236C</i> | Hypothetical protein                                                | 0.81 ± 0.04 |
| <i>CMJ079C</i> | Hypothetical protein                                                | 0.81 ± 0.04 |
| <i>CMJ018C</i> | Hypothetical protein                                                | 0.81 ± 0.09 |
| <i>CMK254C</i> | Similar to tRNA-splicing endonuclease subunit                       | 0.81 ± 0.01 |
| <i>CMR469C</i> | Hypothetical protein                                                | 0.81 ± 0.03 |
| <i>CMP343C</i> | Hypothetical protein                                                | 0.81 ± 0.04 |
| <i>CMP043C</i> | RNA polymerase II third large subunit                               | 0.81 ± 0.03 |
| <i>CMO053C</i> | Alpha,alpha-trehalose-phosphate synthase (UDP-forming)              | 0.81 ± 0.07 |
| <i>CMR390C</i> | Hypothetical protein                                                | 0.81 ± 0.02 |
| <i>CMR407C</i> | Cell division cycle protein cdc27, TPR protein, APC3                | 0.81 ± 0.05 |
| <i>CMS160C</i> | Hypothetical protein                                                | 0.81 ± 0.09 |
| <i>CMJ069C</i> | Small GTP-binding protein (Rho+Ras, tandemly repeated)              | 0.81 ± 0.01 |
| <i>CMN252C</i> | Similar to cpce-related prtein                                      | 0.81 ± 0.03 |
| <i>CMJ208C</i> | Hypothetical protein                                                | 0.81 ± 0.04 |
| <i>CMT024C</i> | Arsenic methyltransferase Cyt19                                     | 0.81 ± 0.07 |
| <i>CMB109C</i> | Similar to polyphosphoinositide binding protein Ssh2                | 0.81 ± 0.05 |
| <i>CMII84C</i> | Box H/ACA snoRNP component GAR1                                     | 0.81 ± 0.04 |

|                |                                                                  |      |   |      |
|----------------|------------------------------------------------------------------|------|---|------|
| <i>CMS498C</i> | Similar to thiamine phosphate pyrophosphorylase                  | 0.81 | ± | 0.06 |
| <i>CMJ052C</i> | Hypothetical protein                                             | 0.81 | ± | 0.07 |
| <i>CMJ217C</i> | Hypothetical protein                                             | 0.81 | ± | 0.04 |
| <i>CMG037C</i> | Hypothetical protein                                             | 0.81 | ± | 0.09 |
| <i>CMM247C</i> | Hypothetical protein                                             | 0.81 | ± | 0.08 |
| <i>CMS371C</i> | MYB-related protein                                              | 0.81 | ± | 0.06 |
| <i>CMP212C</i> | Hypothetical protein                                             | 0.81 | ± | 0.03 |
| <i>CMB083C</i> | Chaperonin containing TCP1, subunit 3 (gamma)                    | 0.81 | ± | 0.03 |
| <i>CMM194C</i> | Hypothetical protein                                             | 0.81 | ± | 0.06 |
| <i>CMR236C</i> | Similar to tRNA-specific adenosine-34 deaminase subunit Tad3p    | 0.81 | ± | 0.07 |
| <i>CMF130C</i> | Hypothetical protein                                             | 0.81 | ± | 0.01 |
| <i>CMB081C</i> | Hypothetical protein                                             | 0.81 | ± | 0.02 |
| <i>CMJ213C</i> | Calnexin                                                         | 0.81 | ± | 0.15 |
| <i>CMF139C</i> | Serine/threonine protein kinase SNF1                             | 0.81 | ± | 0.07 |
| <i>CMR259C</i> | Probable DNA repair protein RAD5                                 | 0.81 | ± | 0.03 |
| <i>CMO132C</i> | Probable DNA mismatch repair protein MutS                        | 0.81 | ± | 0.03 |
| <i>CMR344C</i> | Hypothetical protein                                             | 0.81 | ± | 0.15 |
| <i>CMI151C</i> | Nucleotide excision repair protein XP-D                          | 0.81 | ± | 0.07 |
| <i>CMQ441C</i> | Probable lipoic acid synthase, mitochondrial precursor           | 0.81 | ± | 0.11 |
| <i>CMT047C</i> | Eukaryotic translation initiation factor eIF-2B delta subunit    | 0.81 | ± | 0.10 |
| <i>CMB037C</i> | Hypothetical protein                                             | 0.81 | ± | 0.02 |
| <i>CMR473C</i> | Hypothetical protein                                             | 0.81 | ± | 0.09 |
| <i>CMO015C</i> | Hypothetical protein                                             | 0.81 | ± | 0.04 |
| <i>CMM062C</i> | Probable aminobutyraldehyde dehydrogenase                        | 0.81 | ± | 0.07 |
| <i>CMP015C</i> | Similar to Raf/ATN-like protein kinase, with ankyrin repeats     | 0.81 | ± | 0.06 |
| <i>CMH262C</i> | TATA-box binding protein-associated factor 1                     | 0.81 | ± | 0.04 |
| <i>CMJ221C</i> | Diaminopimelate decarboxylase                                    | 0.81 | ± | 0.12 |
| <i>CMI135C</i> | Single strand binding protein, SSB                               | 0.81 | ± | 0.03 |
| <i>CMT245C</i> | Retroelement                                                     | 0.80 | ± | 0.08 |
| <i>CMS351C</i> | Eukaryotic translation initiation factor eIF-5A                  | 0.80 | ± | 0.09 |
| <i>CMI017C</i> | Similar to exosome complex exonuclease RRP40                     | 0.80 | ± | 0.04 |
| <i>CMF031C</i> | Hypothetical protein                                             | 0.80 | ± | 0.01 |
| <i>CMG151C</i> | Hypothetical protein                                             | 0.80 | ± | 0.03 |
| <i>CMO061C</i> | Hypothetical protein                                             | 0.80 | ± | 0.06 |
| <i>CMN184C</i> | Hypothetical protein                                             | 0.80 | ± | 0.04 |
| <i>CMB013C</i> | Topoisomerase II                                                 | 0.80 | ± | 0.06 |
| <i>CMH091C</i> | Hypothetical protein                                             | 0.80 | ± | 0.02 |
| <i>CMO246C</i> | Probable RNA binding protein Mrd1p                               | 0.80 | ± | 0.08 |
| <i>CMG096C</i> | Similar to ribonuclease P subunit POP4                           | 0.80 | ± | 0.10 |
| <i>CMQ194C</i> | Similar to signal recognition particle targeting component SRP72 | 0.80 | ± | 0.06 |
| <i>CMP177C</i> | Transposon                                                       | 0.80 | ± | 0.06 |
| <i>CMD047C</i> | Hypothetical protein                                             | 0.80 | ± | 0.08 |
| <i>CML330C</i> | DNA topoisomerase II                                             | 0.80 | ± | 0.08 |



|                |                                                                       |             |
|----------------|-----------------------------------------------------------------------|-------------|
| <i>CMB078C</i> | Similar to suppressor of lin12 SEL1                                   | 0.80 ± 0.05 |
| <i>CMF046C</i> | Similar to beta-tubulin folding cofactor D                            | 0.80 ± 0.05 |
| <i>CML074C</i> | Similar to trithorax protein ash2                                     | 0.80 ± 0.05 |
| <i>CMN074C</i> | Box C/D snoRNP rRNA methylase component fibrillar                     | 0.80 ± 0.14 |
| <i>CMM291C</i> | E3 ubiquitin ligase SCF complex Cullin subunit                        | 0.80 ± 0.02 |
| <i>CMC129C</i> | Similar to nuclear pore complex protein NUP107                        | 0.80 ± 0.12 |
| <i>CMK113C</i> | Alpha-1,3-mannosyltransferase                                         | 0.80 ± 0.06 |
| <i>CMA015C</i> | Hypothetical protein                                                  | 0.80 ± 0.03 |
| <i>CMN329C</i> | Hypothetical protein                                                  | 0.80 ± 0.13 |
| <i>CMN090C</i> | Similar to syntaxin binding protein                                   | 0.80 ± 0.02 |
| <i>CML028C</i> | Hypothetical protein                                                  | 0.80 ± 0.08 |
| <i>CMQ297C</i> | Hypothetical protein                                                  | 0.80 ± 0.02 |
| <i>CML143C</i> | Hypothetical protein                                                  | 0.80 ± 0.08 |
| <i>CML247C</i> | Riboflavin synthase alpha chain                                       | 0.80 ± 0.04 |
| <i>CMQ041C</i> | Pseudouridylate synthase I                                            | 0.80 ± 0.09 |
| <i>CMT459C</i> | Long-chain-fatty-acid CoA ligase                                      | 0.80 ± 0.04 |
| <i>CMK180C</i> | Probable transcription regulator exsB                                 | 0.80 ± 0.05 |
| <i>CMG141C</i> | Gamma-glutamylcysteine synthetase                                     | 0.80 ± 0.02 |
| <i>CMN305C</i> | Hypothetical protein                                                  | 0.80 ± 0.06 |
| <i>CMM243C</i> | Hypothetical protein                                                  | 0.80 ± 0.05 |
| <i>CMJ231C</i> | Similar to 2-hydroxy-6-oxohepta-2,4-dienoate hydrolase                | 0.80 ± 0.02 |
| <i>CMP145C</i> | Probable 70kDa heat shock cognate protein                             | 0.80 ± 0.14 |
| <i>CMR266C</i> | Hypothetical protein                                                  | 0.80 ± 0.00 |
| <i>CMS276C</i> | Exportin 1 (Xpo1)                                                     | 0.80 ± 0.07 |
| <i>CME062C</i> | Probable cationic amino acid transporter ctra                         | 0.80 ± 0.04 |
| <i>CMO268C</i> | Hypothetical protein                                                  | 0.80 ± 0.05 |
| <i>CMG086C</i> | Aminomethyltransferase                                                | 0.80 ± 0.13 |
| <i>CMP232C</i> | Hypothetical protein                                                  | 0.80 ± 0.06 |
| <i>CMP277C</i> | Mitochondrial ribosomal protein L2 precursor                          | 0.80 ± 0.09 |
| <i>CMB155C</i> | Similar to uncharacterized hematopoietic stem/progenitor cell protein | 0.80 ± 0.13 |
| <i>CMK106C</i> | Hypothetical protein                                                  | 0.80 ± 0.10 |
| <i>CME135C</i> | Probable purple acid phosphatase                                      | 0.80 ± 0.02 |
| <i>CMJ238C</i> | 6,7-dimethyl-8-ribityllumazine (DMRL/Lumazine/Riboflavin) synthase    | 0.80 ± 0.04 |
| <i>CMQ075C</i> | Hypothetical protein                                                  | 0.80 ± 0.08 |
| <i>CMT444C</i> | Hypothetical protein                                                  | 0.80 ± 0.05 |
| <i>CMR432C</i> | Similar to cation transporting ATPase                                 | 0.80 ± 0.02 |
| <i>CMS031C</i> | Similar to peroxisomal membrane protein PMP22                         | 0.80 ± 0.07 |
| <i>CMT409C</i> | Hypothetical protein                                                  | 0.80 ± 0.05 |
| <i>CMP223C</i> | Mitochondrial ribosomal protein S18 precursor                         | 0.80 ± 0.03 |
| <i>CMJ056C</i> | Hypothetical protein                                                  | 0.80 ± 0.04 |
| <i>CMP114C</i> | Mismatch repair protein Msh2                                          | 0.80 ± 0.08 |
| <i>CMS239C</i> | Hypothetical protein                                                  | 0.80 ± 0.03 |
| <i>CMJ305C</i> | Phosphoglycerate kinase                                               | 0.80 ± 0.05 |

|                |                                                                       |             |
|----------------|-----------------------------------------------------------------------|-------------|
| <i>CMC115C</i> | Hypothetical protein                                                  | 0.80 ± 0.03 |
| <i>CMJ246C</i> | Trans-prenyltransferase                                               | 0.80 ± 0.02 |
| <i>CMN038C</i> | Hypothetical protein                                                  | 0.80 ± 0.01 |
| <i>CML025C</i> | Similar to CBL-interacting protein kinase                             | 0.80 ± 0.11 |
| <i>CMT061C</i> | Zeta-carotene desaturase                                              | 0.80 ± 0.08 |
| <i>CMM141C</i> | Similar to zinc finger protein                                        | 0.80 ± 0.03 |
| <i>CMT066C</i> | ATP-binding cassette, sub-family B (MDR/TAP), member 6                | 0.80 ± 0.05 |
| <i>CMQ095C</i> | Hypothetical protein                                                  | 0.80 ± 0.05 |
| <i>CMT067C</i> | Transcription factor E2F                                              | 0.80 ± 0.09 |
| <i>CME108C</i> | Similar to protein phosphatase 2A regulatory subunit B                | 0.80 ± 0.05 |
| <i>CMO247C</i> | Hypothetical protein                                                  | 0.80 ± 0.04 |
| <i>CMQ022C</i> | Probable peptidyl-tRNA hydrolase                                      | 0.80 ± 0.03 |
| <i>CMT202C</i> | Hypothetical protein                                                  | 0.80 ± 0.05 |
| <i>CMS422C</i> | Probable chromosome condensation protein G                            | 0.80 ± 0.05 |
| <i>CMJ082C</i> | Hypothetical protein                                                  | 0.80 ± 0.03 |
| <i>CMN053C</i> | Similar to DNA repair and recombination protein Rad57p/XRCC2          | 0.80 ± 0.04 |
| <i>CMM195C</i> | Hypothetical protein                                                  | 0.80 ± 0.07 |
| <i>CMA021C</i> | Similar to DnaJ (Hsp40) homolog                                       | 0.80 ± 0.13 |
| <i>CMR227C</i> | Hypothetical protein                                                  | 0.80 ± 0.08 |
| <i>CMS345C</i> | Sps1-like serine/threonine kinase                                     | 0.80 ± 0.04 |
| <i>CMG045C</i> | Hypothetical protein                                                  | 0.80 ± 0.07 |
| <i>CMT534C</i> | Hypothetical protein                                                  | 0.80 ± 0.13 |
| <i>CMR017C</i> | Hypothetical protein                                                  | 0.80 ± 0.03 |
| <i>CMH096C</i> | Hypothetical protein                                                  | 0.80 ± 0.09 |
| <i>CMJ145C</i> | Hypothetical protein                                                  | 0.80 ± 0.02 |
| <i>CMG127C</i> | Hypothetical protein                                                  | 0.80 ± 0.04 |
| <i>CMS285C</i> | Hypothetical protein                                                  | 0.80 ± 0.03 |
| <i>CMR363C</i> | Hypothetical protein                                                  | 0.80 ± 0.08 |
| <i>CMJ120C</i> | Similar to 26S proteasome associated protein                          | 0.80 ± 0.06 |
| <i>CMR057C</i> | Ubiquitin-specific protease                                           | 0.80 ± 0.05 |
| <i>CMJ128C</i> | Phenylalanine--tRNA ligase beta-subunit                               | 0.80 ± 0.02 |
| <i>CMD184C</i> | Glycogen phosphorylase                                                | 0.80 ± 0.05 |
| <i>CMI105C</i> | Hypothetical protein                                                  | 0.80 ± 0.04 |
| <i>CMI241C</i> | Similar to carboxy-terminal proteinase                                | 0.80 ± 0.06 |
| <i>CMA052C</i> | Probable ornithine decarboxylase                                      | 0.80 ± 0.10 |
| <i>CME081C</i> | Hypothetical protein                                                  | 0.80 ± 0.04 |
| <i>CMO260C</i> | Eukaryotic translation initiation factor eIF-3 subunit 7              | 0.80 ± 0.12 |
| <i>CMK135C</i> | Similar to NADH dehydrogenase I (Complex I) alpha subcomplex 1 (MWFE) | 0.80 ± 0.05 |
| <i>CMI250C</i> | Similar to Golgi SNARE protein                                        | 0.80 ± 0.05 |
| <i>CMK275C</i> | Hypothetical protein                                                  | 0.80 ± 0.06 |
| <i>CMG168C</i> | Probable purple acid phosphatase protein                              | 0.79 ± 0.08 |
| <i>CMH133C</i> | Hypothetical protein                                                  | 0.79 ± 0.13 |
| <i>CMT072C</i> | Isovaleryl-CoA dehydrogenase                                          | 0.79 ± 0.03 |

|                |                                                        |      |   |      |
|----------------|--------------------------------------------------------|------|---|------|
| <i>CMM314C</i> | Alanine--tRNA ligase cytoplasmic (plus mito?)          | 0.79 | ± | 0.02 |
| <i>CME154C</i> | Hypothetical protein                                   | 0.79 | ± | 0.04 |
| <i>CMG177C</i> | Hypothetical protein                                   | 0.79 | ± | 0.05 |
| <i>CMJ306C</i> | Similar to ribonuclease PH                             | 0.79 | ± | 0.02 |
| <i>CMA023C</i> | MYB-related protein                                    | 0.79 | ± | 0.05 |
| <i>CMG119C</i> | Similar to histidine triad protein (HIT)               | 0.79 | ± | 0.02 |
| <i>CMJ005C</i> | Similar to cell surface glycoprotein                   | 0.79 | ± | 0.05 |
| <i>CMR306C</i> | Similar to calcium-transporting P-type ATPase          | 0.79 | ± | 0.02 |
| <i>CML068C</i> | Hypothetical protein                                   | 0.79 | ± | 0.04 |
| <i>CMA128C</i> | Hypothetical protein                                   | 0.79 | ± | 0.02 |
| <i>CMM094C</i> | Elongator protein Elp3p                                | 0.79 | ± | 0.06 |
| <i>CMG185C</i> | Hypothetical protein                                   | 0.79 | ± | 0.15 |
| <i>CMQ328C</i> | Hypothetical protein                                   | 0.79 | ± | 0.02 |
| <i>CMH192C</i> | Unknown zinc finger protein                            | 0.79 | ± | 0.14 |
| <i>CMP285C</i> | Glutamate-1-semialdehyde 2,1-aminomutase               | 0.79 | ± | 0.10 |
| <i>CME139C</i> | Similar to spindle checkpoint protein Xmad1            | 0.79 | ± | 0.05 |
| <i>CMR360C</i> | Hypothetical protein                                   | 0.79 | ± | 0.05 |
| <i>CMQ364C</i> | Hypothetical protein                                   | 0.79 | ± | 0.09 |
| <i>CMG148C</i> | 1-deoxy-D-xylulose 5-phosphate reductoisomerase        | 0.79 | ± | 0.10 |
| <i>CME194C</i> | Uroporphyrinogen decarboxylase                         | 0.79 | ± | 0.05 |
| <i>CMM193C</i> | Hypothetical protein                                   | 0.79 | ± | 0.03 |
| <i>CMP085C</i> | Similar to phosphoserine phosphatase                   | 0.79 | ± | 0.12 |
| <i>CMT231C</i> | Hypothetical protein                                   | 0.79 | ± | 0.15 |
| <i>CMC163C</i> | Hypothetical protein                                   | 0.79 | ± | 0.11 |
| <i>CMA022C</i> | Hypothetical protein                                   | 0.79 | ± | 0.05 |
| <i>CMR320C</i> | Hypothetical protein                                   | 0.79 | ± | 0.05 |
| <i>CMQ367C</i> | Similar to nucleosome/chromatin assembly factor C      | 0.79 | ± | 0.03 |
| <i>CMP028C</i> | ATP-binding cassette, sub-family D (PMP)               | 0.79 | ± | 0.09 |
| <i>CMP337C</i> | Similar to desmoplakin                                 | 0.79 | ± | 0.03 |
| <i>CMS495C</i> | Probable transcriptional adaptor ADA2                  | 0.79 | ± | 0.05 |
| <i>CMD105C</i> | Similar to peroxisomal membrane protein PEX2           | 0.79 | ± | 0.05 |
| <i>CMT579C</i> | Heat shock protein 70                                  | 0.79 | ± | 0.09 |
| <i>CME130C</i> | Hypothetical protein                                   | 0.79 | ± | 0.04 |
| <i>CMF095C</i> | TATA-box binding protein                               | 0.79 | ± | 0.05 |
| <i>CMQ376C</i> | Hypothetical protein                                   | 0.79 | ± | 0.10 |
| <i>CMC141C</i> | Bis(5'-adenosyl)-triphosphatase                        | 0.79 | ± | 0.02 |
| <i>CMQ039C</i> | MAP kinase                                             | 0.79 | ± | 0.09 |
| <i>CMS401C</i> | Unknown ABC transporter ATP-binding subunit            | 0.79 | ± | 0.04 |
| <i>CMT289C</i> | PGR5                                                   | 0.79 | ± | 0.09 |
| <i>CMC051C</i> | Similar to programmed cell death 6 interacting protein | 0.79 | ± | 0.06 |
| <i>CMQ065C</i> | Hypothetical protein                                   | 0.79 | ± | 0.07 |
| <i>CMO168C</i> | Hypothetical protein                                   | 0.79 | ± | 0.02 |
| <i>CMB136C</i> | Hypothetical protein                                   | 0.79 | ± | 0.03 |

|                |                                                                                                  |             |
|----------------|--------------------------------------------------------------------------------------------------|-------------|
| <i>CMK186C</i> | Hypothetical protein                                                                             | 0.79 ± 0.01 |
| <i>CMK064C</i> | Eukaryotic translation initiation factor eIF-2B alpha subunit                                    | 0.79 ± 0.08 |
| <i>CMQ351C</i> | Hypothetical protein                                                                             | 0.79 ± 0.02 |
| <i>CMK046C</i> | Uridine 5'-monophosphate synthase (UMP synthase)                                                 | 0.79 ± 0.02 |
| <i>CMR415C</i> | Similar to BTB domain and Ankaryin repeat containing protein                                     | 0.79 ± 0.02 |
| <i>CMG092C</i> | Similar to periplasmic protein p19                                                               | 0.79 ± 0.06 |
| <i>CMJ116C</i> | Hypothetical protein                                                                             | 0.79 ± 0.04 |
| <i>CMO236C</i> | Hypothetical protein                                                                             | 0.79 ± 0.01 |
| <i>CMG083C</i> | Hypothetical protein                                                                             | 0.79 ± 0.04 |
| <i>CMO241C</i> | Hypothetical protein                                                                             | 0.79 ± 0.01 |
| <i>CMR205C</i> | Asparagine--tRNA ligase, chloroplast precursor                                                   | 0.79 ± 0.04 |
| <i>CMI224C</i> | Glucose-6-phosphate 1-dehydrogenase                                                              | 0.79 ± 0.06 |
| <i>CMT501C</i> | Probable transcription elongation factor S-II (TFIIS)                                            | 0.79 ± 0.04 |
| <i>CMT420C</i> | Malonyl-CoA:Acyl carrier protein transacylase (MCT)                                              | 0.79 ± 0.02 |
| <i>CMT465C</i> | Similar to dual-specificity phosphatase laforin                                                  | 0.79 ± 0.05 |
| <i>CMO235C</i> | 26S proteasome component                                                                         | 0.79 ± 0.03 |
| <i>CMS060C</i> | Hypothetical protein                                                                             | 0.79 ± 0.07 |
| <i>CMF167C</i> | Hypothetical protein                                                                             | 0.79 ± 0.02 |
| <i>CMS059C</i> | Hypothetical protein                                                                             | 0.79 ± 0.07 |
| <i>CMI040C</i> | Chloroplast ADP,ATP carrier protein                                                              | 0.79 ± 0.06 |
| <i>CMS287C</i> | Hypothetical protein                                                                             | 0.79 ± 0.01 |
| <i>CMD029C</i> | Hypothetical protein                                                                             | 0.79 ± 0.08 |
| <i>CMQ139C</i> | Hypothetical protein                                                                             | 0.79 ± 0.06 |
| <i>CMG040C</i> | Hypothetical protein                                                                             | 0.79 ± 0.06 |
| <i>CML097C</i> | Similar to nucleotide excision repair complex subunit XPC                                        | 0.79 ± 0.03 |
| <i>CMK271C</i> | Hypothetical protein                                                                             | 0.79 ± 0.05 |
| <i>CMM091C</i> | Hypothetical protein                                                                             | 0.79 ± 0.04 |
| <i>CMI065C</i> | Similar to mitochondrial RNA splicing protein Mrs2p                                              | 0.79 ± 0.01 |
| <i>CMT500C</i> | Hypothetical protein                                                                             | 0.79 ± 0.05 |
| <i>CMK200C</i> | Hypothetical protein                                                                             | 0.79 ± 0.06 |
| <i>CMR076C</i> | Probable phosphotyrosyl phosphatase activator protein                                            | 0.79 ± 0.02 |
| <i>CMP003C</i> | Hypothetical protein                                                                             | 0.79 ± 0.12 |
| <i>CMM004C</i> | Hypothetical protein                                                                             | 0.79 ± 0.02 |
| <i>CMK131C</i> | Enolase                                                                                          | 0.79 ± 0.06 |
| <i>CMS390C</i> | Probable essential nucleolar protein required for biogenesis of the 60S ribosomal subunit; Brx1p | 0.79 ± 0.06 |
| <i>CMI211C</i> | Hypothetical protein                                                                             | 0.79 ± 0.00 |
| <i>CML110C</i> | Nucleoside-diphosphate kinase                                                                    | 0.79 ± 0.03 |
| <i>CMH249C</i> | Hypothetical protein                                                                             | 0.79 ± 0.07 |
| <i>CMT416C</i> | Similar to carbonic anhydrase precursor                                                          | 0.79 ± 0.07 |
| <i>CMS464C</i> | TBP-associated factor 172, similar to SWI2/SNF2 family                                           | 0.79 ± 0.07 |
| <i>CMB087C</i> | Hypothetical protein                                                                             | 0.79 ± 0.05 |
| <i>CMR168C</i> | Hypothetical protein                                                                             | 0.78 ± 0.11 |
| <i>CMQ127C</i> | Hypothetical protein                                                                             | 0.78 ± 0.05 |

|                |                                                                       |             |
|----------------|-----------------------------------------------------------------------|-------------|
| <i>CMN123C</i> | eIF-2alpha kinase GCN2                                                | 0.78 ± 0.04 |
| <i>CMG182C</i> | Hypothetical protein                                                  | 0.78 ± 0.03 |
| <i>CMT137C</i> | Hypothetical protein                                                  | 0.78 ± 0.06 |
| <i>CMQ464C</i> | Hypothetical protein                                                  | 0.78 ± 0.07 |
| <i>CML107C</i> | Hypothetical protein                                                  | 0.78 ± 0.06 |
| <i>CML257C</i> | Hypothetical protein                                                  | 0.78 ± 0.05 |
| <i>CMR225C</i> | Probable pyruvate dehydrogenase kinase                                | 0.78 ± 0.03 |
| <i>CMS159C</i> | UTP--glucose-1-phosphate uridylyltransferase                          | 0.78 ± 0.06 |
| <i>CMK037C</i> | RNA polymerase I largest subunit                                      | 0.78 ± 0.01 |
| <i>CMP230C</i> | Probable protein phosphatase methylesterase-1                         | 0.78 ± 0.03 |
| <i>CMT063C</i> | Chloroplast membrane protein ALBINO3 or ARTEMIS                       | 0.78 ± 0.06 |
| <i>CMJ300C</i> | Hypothetical protein                                                  | 0.78 ± 0.01 |
| <i>CMR388C</i> | ATP-binding subunit of unknown ABC transporter                        | 0.78 ± 0.11 |
| <i>CMP166C</i> | Phycocyanin-associated rod linker protein                             | 0.78 ± 0.10 |
| <i>CME037C</i> | Cysteine--tRNA ligase, chloroplast or mitochondrial                   | 0.78 ± 0.05 |
| <i>CMN116C</i> | Hypothetical protein                                                  | 0.78 ± 0.02 |
| <i>CMB108C</i> | Spindle checkpoint protein kinase MPS1                                | 0.78 ± 0.04 |
| <i>CMJ123C</i> | Hypothetical protein                                                  | 0.78 ± 0.08 |
| <i>CMC016C</i> | Similar to programmed cell death 2                                    | 0.78 ± 0.04 |
| <i>CMT353C</i> | Unknown snf2 family helicase                                          | 0.78 ± 0.04 |
| <i>CMO193C</i> | Hypothetical protein                                                  | 0.78 ± 0.04 |
| <i>CMM215C</i> | Hypothetical protein                                                  | 0.78 ± 0.06 |
| <i>CMR099C</i> | Probable pirin                                                        | 0.78 ± 0.11 |
| <i>CMG100C</i> | Hypothetical protein                                                  | 0.78 ± 0.07 |
| <i>CMO319C</i> | Hypothetical protein                                                  | 0.78 ± 0.06 |
| <i>CMR172C</i> | Similar to 26S proteasome subunit 4                                   | 0.78 ± 0.06 |
| <i>CMB006C</i> | Hypothetical protein                                                  | 0.78 ± 0.07 |
| <i>CMS403C</i> | Hypothetical protein                                                  | 0.78 ± 0.02 |
| <i>CMQ180C</i> | Hypothetical protein                                                  | 0.78 ± 0.07 |
| <i>CMO203C</i> | Hypothetical protein                                                  | 0.78 ± 0.05 |
| <i>CMR459C</i> | Similar to fructosamine 3 kinase                                      | 0.78 ± 0.05 |
| <i>CMT442C</i> | Hypothetical protein                                                  | 0.78 ± 0.05 |
| <i>CMT291C</i> | Hypothetical protein                                                  | 0.78 ± 0.05 |
| <i>CMA119C</i> | Similar to oxidant-induced cell-cycle arrest Oca1p                    | 0.78 ± 0.03 |
| <i>CMQ116C</i> | Similar to phytoene synthase                                          | 0.78 ± 0.04 |
| <i>CMQ012C</i> | Hypothetical protein                                                  | 0.78 ± 0.06 |
| <i>CME157C</i> | Hypothetical protein                                                  | 0.78 ± 0.05 |
| <i>CMQ169C</i> | Hypothetical protein                                                  | 0.78 ± 0.06 |
| <i>CMR331C</i> | Similar to proteasome (prosome, macropain) 26S subunit, non-ATPase, 9 | 0.78 ± 0.11 |
| <i>CME131C</i> | Hypothetical protein                                                  | 0.78 ± 0.03 |
| <i>CMT190C</i> | Riboflavin kinase/FMN adenylyltransferase                             | 0.78 ± 0.02 |
| <i>CMJ216C</i> | ATP-binding protein of ABC transporter                                | 0.78 ± 0.06 |
| <i>CMP176C</i> | Similar to TFIIF interacting component of CTD phosphatase Fcp1p       | 0.78 ± 0.06 |

|                |                                                                              |             |
|----------------|------------------------------------------------------------------------------|-------------|
| <i>CMM013C</i> | Queuine tRNA ribosyltransferase                                              | 0.78 ± 0.06 |
| <i>CML057C</i> | Unknown kinase with aarF domain                                              | 0.78 ± 0.01 |
| <i>CM1255C</i> | Importin beta-3 subunit (Karyopherin beta-3 subunit) (Ran-binding protein 5) | 0.78 ± 0.07 |
| <i>CMR203C</i> | Vesicle coat complex COPII, subunit Sec31                                    | 0.78 ± 0.03 |
| <i>CMI124C</i> | Hypothetical protein                                                         | 0.78 ± 0.05 |
| <i>CMQ096C</i> | Hypothetical protein                                                         | 0.78 ± 0.07 |
| <i>CMP198C</i> | Hypothetical protein                                                         | 0.78 ± 0.03 |
| <i>CML142C</i> | Similar to vacuolar protein sorting 13                                       | 0.78 ± 0.09 |
| <i>CMS179C</i> | Similar to protein phosphatase 2C                                            | 0.78 ± 0.05 |
| <i>CMT336C</i> | Hypothetical protein                                                         | 0.78 ± 0.06 |
| <i>CMR151C</i> | Similar to cytochrome b5                                                     | 0.78 ± 0.09 |
| <i>CMQ233C</i> | Hypothetical protein                                                         | 0.78 ± 0.16 |
| <i>CMJ198C</i> | Similar to protoporphyrinogen oxidase HemK                                   | 0.78 ± 0.08 |
| <i>CMT079C</i> | Hypothetical protein                                                         | 0.78 ± 0.05 |
| <i>CMF047C</i> | Probable mercaptopyruvate sulfurtransferase                                  | 0.78 ± 0.05 |
| <i>CMN306C</i> | Hypothetical protein                                                         | 0.78 ± 0.08 |
| <i>CMR402C</i> | Similar to rotamase/parvulin-type peptidyl-prolyl cis-trans isomerase        | 0.78 ± 0.02 |
| <i>CMI142C</i> | Dihydroxy-acid dehydratase                                                   | 0.78 ± 0.06 |
| <i>CME138C</i> | Hypothetical protein                                                         | 0.78 ± 0.12 |
| <i>CMS232C</i> | K efflux antiporter KEA1                                                     | 0.78 ± 0.16 |
| <i>CMM030C</i> | NADH dehydrogenase I (Complex I) beta subcomplex 9 (B22)                     | 0.78 ± 0.08 |
| <i>CMI086C</i> | Phosphoserine phosphatase (PSP) (O-phosphoserine phosphohydrolase)           | 0.78 ± 0.07 |
| <i>CMQ274C</i> | Similar to oxidoreductase                                                    | 0.78 ± 0.04 |
| <i>CMN132C</i> | Box H/ACA snoRNP component NHP2                                              | 0.78 ± 0.04 |
| <i>CMF141C</i> | Similar to prefoldin subunit3                                                | 0.78 ± 0.13 |
| <i>CMH066C</i> | Mitochondrial ribosomal protein S15 precursor                                | 0.78 ± 0.07 |
| <i>CMA106C</i> | Similar to alpha-glucosidase                                                 | 0.78 ± 0.04 |
| <i>CMR298C</i> | Heat shock protein DnaJ                                                      | 0.78 ± 0.06 |
| <i>CMT266C</i> | MYB-related protein                                                          | 0.78 ± 0.08 |
| <i>CMA118C</i> | Hypothetical protein                                                         | 0.78 ± 0.08 |
| <i>CMF026C</i> | Hypothetical protein                                                         | 0.78 ± 0.05 |
| <i>CMQ050C</i> | Hypothetical protein                                                         | 0.78 ± 0.10 |
| <i>CMS402C</i> | Hypothetical protein                                                         | 0.78 ± 0.05 |
| <i>CMQ142C</i> | Similar to light harvesting protein                                          | 0.78 ± 0.02 |
| <i>CMR197C</i> | RNA polymerase I, III common subunit                                         | 0.78 ± 0.08 |
| <i>CMT591C</i> | Hypothetical protein                                                         | 0.78 ± 0.06 |
| <i>CMT323C</i> | Hypothetical protein                                                         | 0.78 ± 0.07 |
| <i>CMR224C</i> | RNA polymerase II largest subunit                                            | 0.78 ± 0.05 |
| <i>CMT100C</i> | Hypothetical protein                                                         | 0.78 ± 0.07 |
| <i>CMR181C</i> | Unknown transporter                                                          | 0.77 ± 0.08 |
| <i>CMB089C</i> | Hypothetical protein                                                         | 0.77 ± 0.08 |
| <i>CMS086C</i> | Hypothetical protein                                                         | 0.77 ± 0.05 |
| <i>CMO058C</i> | Rub1-activating enzyme E1 N subunit                                          | 0.77 ± 0.05 |

|                |                                                                          |      |   |      |
|----------------|--------------------------------------------------------------------------|------|---|------|
| <i>CMQ386C</i> | Similar to V-type ATPase V1 subunit H                                    | 0.77 | ± | 0.09 |
| <i>CME087C</i> | Probable acetyl-CoA C-acetyltransferase                                  | 0.77 | ± | 0.08 |
| <i>CML179C</i> | Lipoic acid synthetase                                                   | 0.77 | ± | 0.03 |
| <i>CMS437C</i> | Hypothetical protein                                                     | 0.77 | ± | 0.07 |
| <i>CMT445C</i> | Acetoacetyl-CoA synthetase                                               | 0.77 | ± | 0.08 |
| <i>CMP210C</i> | Hypothetical protein                                                     | 0.77 | ± | 0.11 |
| <i>CMB140C</i> | Hypothetical protein                                                     | 0.77 | ± | 0.05 |
| <i>CMP158C</i> | Similar to dehydrogenase                                                 | 0.77 | ± | 0.06 |
| <i>CMJ253C</i> | Similar to mitochondrial presequence translocase subunit Tim44           | 0.77 | ± | 0.05 |
| <i>CMS227C</i> | Ubiquinone/menaquinone biosynthesis methyltransferase                    | 0.77 | ± | 0.06 |
| <i>CMS459C</i> | Similar to RNA export mediator                                           | 0.77 | ± | 0.09 |
| <i>CMJ148C</i> | Hypothetical protein                                                     | 0.77 | ± | 0.09 |
| <i>CMO226C</i> | Oligosaccharyl transferase STT3                                          | 0.77 | ± | 0.05 |
| <i>CMK115C</i> | Acyl-CoA oxidase ACX3                                                    | 0.77 | ± | 0.05 |
| <i>CMM081C</i> | Hypothetical protein                                                     | 0.77 | ± | 0.11 |
| <i>CMP273C</i> | Hypothetical protein                                                     | 0.77 | ± | 0.10 |
| <i>CMT302C</i> | Hypothetical protein                                                     | 0.77 | ± | 0.06 |
| <i>CMT617C</i> | Coatomer protein complex, subunit beta 2                                 | 0.77 | ± | 0.05 |
| <i>CMC177C</i> | Similar to calcium binding mitochondrial carrier ARALAR1                 | 0.77 | ± | 0.10 |
| <i>CMF075C</i> | Hypothetical protein                                                     | 0.77 | ± | 0.05 |
| <i>CMT314C</i> | Phosphomannomutase                                                       | 0.77 | ± | 0.08 |
| <i>CMG113C</i> | Protein phosphatase 2C, with protein kinase domain                       | 0.77 | ± | 0.06 |
| <i>CMC156C</i> | Similar to trefoil factor                                                | 0.77 | ± | 0.08 |
| <i>CMK242C</i> | Unknown RNA-binding protein                                              | 0.77 | ± | 0.04 |
| <i>CMC063C</i> | Probable ribosome biogenesis protein NEP1                                | 0.77 | ± | 0.17 |
| <i>CMA121C</i> | Unknown zinc finger protein                                              | 0.77 | ± | 0.08 |
| <i>CML287C</i> | Helicase-like protein                                                    | 0.77 | ± | 0.06 |
| <i>CMP205C</i> | Leucine--tRNA ligase                                                     | 0.77 | ± | 0.09 |
| <i>CMS469C</i> | Similar to Raf/ATN-like protein kinase, with ACT domain                  | 0.77 | ± | 0.03 |
| <i>CMS468C</i> | Similar to DRAP deaminase involved in riboflavin biosynthesis            | 0.77 | ± | 0.05 |
| <i>CMK188C</i> | Phosphoglycerate mutase                                                  | 0.77 | ± | 0.05 |
| <i>CMH034C</i> | Probable DNA repair endonuclease XPF                                     | 0.77 | ± | 0.05 |
| <i>CMN235C</i> | Similar to chlorophyll a/b-binding protein, CP24                         | 0.77 | ± | 0.07 |
| <i>CMF156C</i> | Cystathionine gamma-synthase                                             | 0.77 | ± | 0.06 |
| <i>CMO214C</i> | Hypothetical protein                                                     | 0.77 | ± | 0.04 |
| <i>CMK206C</i> | Hypothetical protein                                                     | 0.77 | ± | 0.02 |
| <i>CMQ184C</i> | Hypothetical protein                                                     | 0.77 | ± | 0.05 |
| <i>CMQ141C</i> | Hypothetical protein                                                     | 0.77 | ± | 0.06 |
| <i>CMN243C</i> | Propionyl-Coenzyme A carboxylase, alpha subunit, mitochondrial precursor | 0.77 | ± | 0.05 |
| <i>CMK221C</i> | Hypothetical protein                                                     | 0.77 | ± | 0.03 |
| <i>CMB036C</i> | Similar to DnaJ family molecular chaperone                               | 0.77 | ± | 0.05 |
| <i>CMQ158C</i> | Unknown deacetylase                                                      | 0.77 | ± | 0.11 |
| <i>CMH185C</i> | Hypothetical protein                                                     | 0.77 | ± | 0.13 |

|                |                                                                                         |             |
|----------------|-----------------------------------------------------------------------------------------|-------------|
| <i>CMT349C</i> | Hypothetical protein                                                                    | 0.77 ± 0.03 |
| <i>CME181C</i> | Similar to serine/threonine protein phosphatase                                         | 0.77 ± 0.09 |
| <i>CMP292C</i> | 2-dehydro-3-deoxyphosphogluconate aldolase, 4-hydroxy-2-oxoglutarate aldolase           | 0.77 ± 0.09 |
| <i>CMN280C</i> | Hypothetical protein                                                                    | 0.77 ± 0.02 |
| <i>CMJ275C</i> | Hypothetical protein                                                                    | 0.77 ± 0.04 |
| <i>CMK083C</i> | DEAD box protein                                                                        | 0.77 ± 0.23 |
| <i>CMR328C</i> | Hypothetical protein                                                                    | 0.77 ± 0.04 |
| <i>CMN215C</i> | Phosphatidate cytidylyltransferase                                                      | 0.77 ± 0.02 |
| <i>CMC031C</i> | Hypothetical protein                                                                    | 0.77 ± 0.02 |
| <i>CMO271C</i> | Cell cycle protein kinase CDC7                                                          | 0.77 ± 0.04 |
| <i>CMG186C</i> | Hypothetical protein                                                                    | 0.77 ± 0.04 |
| <i>CMK211C</i> | Hypothetical protein                                                                    | 0.77 ± 0.10 |
| <i>CML032C</i> | Sodium-dependent transporter                                                            | 0.77 ± 0.04 |
| <i>CMS476C</i> | Similar to regulator for ribosome biogenesis regulatory protein RRS1 of yeast           | 0.77 ± 0.06 |
| <i>CMJ172C</i> | Hypothetical protein                                                                    | 0.77 ± 0.13 |
| <i>CMK184C</i> | Hypothetical protein                                                                    | 0.77 ± 0.03 |
| <i>CMS155C</i> | Similar to Low-affinity zinc transport protein; Zrt2p                                   | 0.77 ± 0.07 |
| <i>CMK078C</i> | Hypothetical protein                                                                    | 0.77 ± 0.10 |
| <i>CML309C</i> | Hypothetical protein                                                                    | 0.77 ± 0.03 |
| <i>CMS494C</i> | Hypothetical protein                                                                    | 0.77 ± 0.09 |
| <i>CML243C</i> | IMP dehydrogenase                                                                       | 0.77 ± 0.03 |
| <i>CMJ191C</i> | Tryptophan synthase beta chain                                                          | 0.77 ± 0.04 |
| <i>CMT161C</i> | Chloroplast signal recognition particle component SRP43                                 | 0.77 ± 0.09 |
| <i>CMG174C</i> | Similar to glycogenin glucosyltransferase                                               | 0.77 ± 0.03 |
| <i>CMC062C</i> | Similar to Tat-interacting protein TIP30                                                | 0.77 ± 0.04 |
| <i>CMB027C</i> | Similar to oxidation resistance protein Oxr1                                            | 0.77 ± 0.08 |
| <i>CMD072C</i> | Hypothetical protein                                                                    | 0.77 ± 0.04 |
| <i>CML119C</i> | Probable transcription regulator SIR2                                                   | 0.77 ± 0.07 |
| <i>CMJ058C</i> | ATP-binding cassette, sub-family E (RLI), member 1                                      | 0.77 ± 0.02 |
| <i>CMS349C</i> | Hypothetical protein                                                                    | 0.77 ± 0.05 |
| <i>CMJ243C</i> | Plastid terminal oxidase                                                                | 0.77 ± 0.06 |
| <i>CMT277C</i> | Hypothetical protein                                                                    | 0.77 ± 0.06 |
| <i>CMN259C</i> | Similar to phospholipid scramblase                                                      | 0.77 ± 0.03 |
| <i>CME112C</i> | Hypothetical protein                                                                    | 0.77 ± 0.12 |
| <i>CMC119C</i> | Hypothetical protein                                                                    | 0.77 ± 0.08 |
| <i>CML156C</i> | Similar to ATP-dependent RNA helicase                                                   | 0.77 ± 0.06 |
| <i>CMD144C</i> | Hypothetical protein                                                                    | 0.77 ± 0.07 |
| <i>CMN137C</i> | Hypothetical protein                                                                    | 0.77 ± 0.03 |
| <i>CMJ189C</i> | Probable mRNA cap binding protein 80                                                    | 0.77 ± 0.04 |
| <i>CMF087C</i> | Hypothetical protein                                                                    | 0.77 ± 0.05 |
| <i>CMJ117C</i> | Sulfite reductase (ferredoxin)                                                          | 0.77 ± 0.08 |
| <i>CMQ278C</i> | 7,8-dihydropteroate synthase/2-amino-4-hydroxy-6-hydroxymethyldihydropteridine (fusion) | 0.77 ± 0.03 |
| <i>CMS219C</i> | Similar to dsRNA-specific ribonuclease                                                  | 0.77 ± 0.02 |



|                |                                                                     |             |
|----------------|---------------------------------------------------------------------|-------------|
| <i>CMT354C</i> | Probable GTPase activating protein                                  | 0.76 ± 0.03 |
| <i>CMD074C</i> | Hypothetical protein                                                | 0.76 ± 0.06 |
| <i>CMN042C</i> | Hypothetical protein                                                | 0.76 ± 0.03 |
| <i>CMR447C</i> | Deoxyribonuclease                                                   | 0.76 ± 0.06 |
| <i>CMJ240C</i> | Serine palmitoyltransferase                                         | 0.76 ± 0.12 |
| <i>CMP184C</i> | Hypothetical protein, Lactoylglutathione lyase                      | 0.76 ± 0.09 |
| <i>CMN111C</i> | Similar to protein disulfide isomerase-related protein P5 precursor | 0.76 ± 0.03 |
| <i>CMM177C</i> | Similar to D-amino acid oxidase                                     | 0.76 ± 0.04 |
| <i>CMJ143C</i> | Hypothetical protein                                                | 0.76 ± 0.02 |
| <i>CMR177C</i> | Similar to ferredoxin                                               | 0.76 ± 0.07 |
| <i>CMQ385C</i> | Probable pre-mRNA splicing factor ATP-dependent RNA helicase PRP16  | 0.76 ± 0.01 |
| <i>CMO275C</i> | Similar to cytidine deaminase                                       | 0.76 ± 0.06 |
| <i>CMG098C</i> | Similar to COP-coated vesicle membrane protein p24                  | 0.76 ± 0.02 |
| <i>CMR125C</i> | Similar to nucleoporin complex subunit                              | 0.76 ± 0.05 |
| <i>CMR079C</i> | Similar to thylakoid lumen rotamase                                 | 0.76 ± 0.03 |
| <i>CMN279C</i> | Similar to thioredoxin f                                            | 0.76 ± 0.10 |
| <i>CMQ330C</i> | Hypothetical protein                                                | 0.76 ± 0.08 |
| <i>CMC070C</i> | Similar to ubiquitin-specific processing protease Ubp2p             | 0.76 ± 0.06 |
| <i>CMK129C</i> | Nitrate ABC transporter ATP-binding protein                         | 0.76 ± 0.04 |
| <i>CMT069C</i> | Hypothetical protein                                                | 0.76 ± 0.07 |
| <i>CME090C</i> | Hypothetical protein                                                | 0.76 ± 0.06 |
| <i>CMR179C</i> | Mitochondrial ribosomal protein L12 precursor                       | 0.76 ± 0.12 |
| <i>CME115C</i> | Hypothetical protein                                                | 0.76 ± 0.03 |
| <i>CMR199C</i> | Similar to transitional endoplasmic reticulum ATPase                | 0.76 ± 0.04 |
| <i>CMQ086C</i> | Retromer component VPS26                                            | 0.76 ± 0.03 |
| <i>CMF162C</i> | Similar to general negative regulator of transcription cdc39        | 0.76 ± 0.04 |
| <i>CMF067C</i> | Hypothetical protein                                                | 0.76 ± 0.07 |
| <i>CMT127C</i> | Hypothetical protein                                                | 0.76 ± 0.06 |
| <i>CMJ303C</i> | Hypothetical protein                                                | 0.76 ± 0.05 |
| <i>CMI252C</i> | DNA topoisomerase I                                                 | 0.76 ± 0.05 |
| <i>CMS215C</i> | Similar to CDK7/cyclin H assembly factor MAT1/TFIIH subunit         | 0.76 ± 0.05 |
| <i>CML217C</i> | Hypothetical protein                                                | 0.76 ± 0.05 |
| <i>CMS183C</i> | Hypothetical protein                                                | 0.76 ± 0.04 |
| <i>CMT558C</i> | Chaperonin containing TCP1, subunit 7 (eta)                         | 0.76 ± 0.13 |
| <i>CMJ047C</i> | Histidine--tRNA ligase                                              | 0.76 ± 0.00 |
| <i>CMM188C</i> | Acetyl-CoA carboxylase, multifunctional enzyme, cytoplasmic         | 0.76 ± 0.04 |
| <i>CMR174C</i> | Hypothetical protein                                                | 0.76 ± 0.07 |
| <i>CMP206C</i> | Similar to U6 snRNA-associated Sm-like protein lsm7                 | 0.76 ± 0.05 |
| <i>CMM178C</i> | NADH dehydrogenase type II, chloroplast precursor                   | 0.76 ± 0.05 |
| <i>CMJ231C</i> | Ubiquinone/menaquinone biosynthesis methyltransferase               | 0.76 ± 0.08 |
| <i>CMJ092C</i> | Similar to protein-tyrosine phosphatase, CDC14 homolog              | 0.76 ± 0.05 |
| <i>CMS088C</i> | Hypothetical protein                                                | 0.76 ± 0.06 |
| <i>CMC029C</i> | Hypothetical protein                                                | 0.76 ± 0.02 |

|                |                                                                |             |
|----------------|----------------------------------------------------------------|-------------|
| <i>CMN017C</i> | Dihydrolipoamide S-acetyltransferase                           | 0.76 ± 0.07 |
| <i>CMS225C</i> | Similar to glycosyl transferase                                | 0.76 ± 0.09 |
| <i>CMR094C</i> | Hypothetical protein                                           | 0.76 ± 0.15 |
| <i>CML108C</i> | Hypothetical protein                                           | 0.76 ± 0.04 |
| <i>CMT398C</i> | Hypothetical protein                                           | 0.76 ± 0.09 |
| <i>CMT170C</i> | Hypothetical protein                                           | 0.76 ± 0.10 |
| <i>CMG139C</i> | Similar to flavin-containing monooxygenase FMO-1               | 0.76 ± 0.08 |
| <i>CMF070C</i> | Probable mannosyl-oligosaccharide glucosidase                  | 0.76 ± 0.04 |
| <i>CMK304C</i> | Similar to syntaxin                                            | 0.76 ± 0.02 |
| <i>CMQ150C</i> | Hypothetical protein                                           | 0.76 ± 0.04 |
| <i>CMT418C</i> | Similar to bifunctional aspartokinase/homoserine dehydrogenase | 0.76 ± 0.04 |
| <i>CMO091C</i> | Similar to myosin heavy chain                                  | 0.76 ± 0.05 |
| <i>CMG006C</i> | Hypothetical protein                                           | 0.76 ± 0.03 |
| <i>CML253C</i> | Hypothetical protein                                           | 0.76 ± 0.05 |
| <i>CMS475C</i> | Similar to tRNA isopentenyltransferase                         | 0.76 ± 0.08 |
| <i>CMG103C</i> | Similar to amino acid transporter protein                      | 0.76 ± 0.07 |
| <i>CMN316C</i> | Hypothetical protein                                           | 0.76 ± 0.03 |
| <i>CMK208C</i> | Similar to U5 snRNP-specific protein                           | 0.76 ± 0.03 |
| <i>CMT138C</i> | Hypothetical protein                                           | 0.76 ± 0.07 |
| <i>CMI122C</i> | Similar to RNA-binding protein with RRM                        | 0.76 ± 0.06 |
| <i>CMN323C</i> | Unknown transaminase                                           | 0.76 ± 0.10 |
| <i>CMQ317C</i> | Hypothetical protein                                           | 0.76 ± 0.02 |
| <i>CMK252C</i> | Hypothetical protein                                           | 0.76 ± 0.07 |
| <i>CMP068C</i> | Hypothetical protein                                           | 0.76 ± 0.06 |
| <i>CMM315C</i> | Hypothetical protein                                           | 0.76 ± 0.09 |
| <i>CMA063C</i> | Hypothetical protein                                           | 0.76 ± 0.10 |
| <i>CMK110C</i> | Hypothetical protein                                           | 0.76 ± 0.03 |
| <i>CMR169C</i> | Hypothetical protein                                           | 0.76 ± 0.07 |
| <i>CMO323C</i> | Hypothetical protein                                           | 0.75 ± 0.05 |
| <i>CMC171C</i> | Similar to ATP-dependent RNA helicase A                        | 0.75 ± 0.07 |
| <i>CMR461C</i> | Hypothetical protein                                           | 0.75 ± 0.03 |
| <i>CMD046C</i> | Hypothetical protein                                           | 0.75 ± 0.06 |
| <i>CMO228C</i> | Hypothetical protein                                           | 0.75 ± 0.05 |
| <i>CMO122C</i> | Hypothetical protein                                           | 0.75 ± 0.07 |
| <i>CMS120C</i> | Guanosine-3',5'-bis(diphosphate) 3'-pyrophosphohydrolase       | 0.75 ± 0.05 |
| <i>CML270C</i> | Hypothetical protein                                           | 0.75 ± 0.05 |
| <i>CMG011C</i> | Hypothetical protein                                           | 0.75 ± 0.06 |
| <i>CMB034C</i> | Hypothetical protein                                           | 0.75 ± 0.03 |
| <i>CMQ390C</i> | Hypothetical protein                                           | 0.75 ± 0.05 |
| <i>CMC124C</i> | Smt3-activating enzyme E1 N subunit                            | 0.75 ± 0.01 |
| <i>CMN105C</i> | ATP-binding cassette, sub-family B (ATM)                       | 0.75 ± 0.08 |
| <i>CMA031C</i> | Hypothetical protein                                           | 0.75 ± 0.04 |
| <i>CMQ294C</i> | Similar to ankyrin                                             | 0.75 ± 0.04 |

|                |                                                                                          |             |
|----------------|------------------------------------------------------------------------------------------|-------------|
| <i>CMJ010C</i> | Hypothetical protein                                                                     | 0.75 ± 0.05 |
| <i>CMJ263C</i> | Acyl-Coenzyme A thioesterase, mitochondrial precursor                                    | 0.75 ± 0.06 |
| <i>CMF082C</i> | Similar to oxygen regulated protein precursor                                            | 0.75 ± 0.08 |
| <i>CMF098C</i> | Similar to glycine cleavage system H protein                                             | 0.75 ± 0.08 |
| <i>CMJ098C</i> | Proline--tRNA ligase                                                                     | 0.75 ± 0.02 |
| <i>CMO270C</i> | Probable DNA polymerase (POL I)                                                          | 0.75 ± 0.03 |
| <i>CMN115C</i> | Similar to Na <sup>+</sup> -driven multidrug efflux pump                                 | 0.75 ± 0.03 |
| <i>CMD159C</i> | Similar to separin (cut1)                                                                | 0.75 ± 0.06 |
| <i>CMT236C</i> | Hypothetical protein                                                                     | 0.75 ± 0.08 |
| <i>CMR311C</i> | Probable Multidrug Resistance Associated Protein (MRP protein) (ATP/GTP-binding protein) | 0.75 ± 0.07 |
| <i>CMO257C</i> | Similar to zinc finger protein myoneurin                                                 | 0.75 ± 0.07 |
| <i>CMP036C</i> | Hypothetical protein                                                                     | 0.75 ± 0.07 |
| <i>CMM323C</i> | Ribonucleoside-diphosphate reductase alpha chain                                         | 0.75 ± 0.04 |
| <i>CMB031C</i> | UDP-glucose 6-dehydrogenase                                                              | 0.75 ± 0.02 |
| <i>CMJ029C</i> | Probable C-14 sterol reductase                                                           | 0.75 ± 0.03 |
| <i>CMN104C</i> | Hypothetical protein                                                                     | 0.75 ± 0.03 |
| <i>CME041C</i> | Hypothetical protein                                                                     | 0.75 ± 0.05 |
| <i>CMQ471C</i> | Vesicle coat complex COPII, subunit Sec24                                                | 0.75 ± 0.04 |
| <i>CMG102C</i> | Similar to ZIP Zinc transporter                                                          | 0.75 ± 0.02 |
| <i>CMN319C</i> | Hypothetical protein                                                                     | 0.75 ± 0.07 |
| <i>CMN113C</i> | Cullin 4                                                                                 | 0.75 ± 0.12 |
| <i>CMG108C</i> | Similar to Raf/ATN-like protein kinase                                                   | 0.75 ± 0.04 |
| <i>CMS447C</i> | Hypothetical protein                                                                     | 0.75 ± 0.07 |
| <i>CMQ093C</i> | Thioredoxin                                                                              | 0.75 ± 0.00 |
| <i>CMS220C</i> | Probable phosphate transporter                                                           | 0.75 ± 0.02 |
| <i>CMH061C</i> | Eukaryotic translation initiation factor eIF-2 beta subunit                              | 0.75 ± 0.03 |
| <i>CMQ214C</i> | Similar to aspartyl beta-hydroxylase                                                     | 0.75 ± 0.12 |
| <i>CMF158C</i> | Dihydroneopterin aldolase                                                                | 0.75 ± 0.06 |
| <i>CMH188C</i> | Hypothetical protein                                                                     | 0.75 ± 0.08 |
| <i>CMN050C</i> | Eukaryotic translation initiation factor eIF-4E                                          | 0.75 ± 0.04 |
| <i>CMN023C</i> | Manganese superoxide dismutase                                                           | 0.75 ± 0.04 |
| <i>CMH082C</i> | Similar to DNA polymerase epsilon small subunit                                          | 0.75 ± 0.06 |
| <i>CMP107C</i> | Probable glutamate decarboxylase                                                         | 0.75 ± 0.02 |
| <i>CMS343C</i> | Heat-shock protein (HSP110 family)                                                       | 0.75 ± 0.05 |
| <i>CME149C</i> | Hypothetical protein                                                                     | 0.75 ± 0.03 |
| <i>CMO219C</i> | Insulin degrading enzyme                                                                 | 0.75 ± 0.05 |
| <i>CMT377C</i> | Hypothetical protein                                                                     | 0.75 ± 0.05 |
| <i>CMP140C</i> | Probable mitochondrial ATP-dependent RNA helicase Suv3                                   | 0.75 ± 0.02 |
| <i>CMQ282C</i> | Similar to nuclear cap-binding protein; CBP20                                            | 0.75 ± 0.05 |
| <i>CMB019C</i> | Similar to U3 snoRNP component Mpp10                                                     | 0.75 ± 0.03 |
| <i>CMF138C</i> | Hypothetical protein                                                                     | 0.75 ± 0.07 |
| <i>CMT320C</i> | Hypothetical protein                                                                     | 0.75 ± 0.08 |
| <i>CMR304C</i> | Hypothetical protein                                                                     | 0.75 ± 0.02 |

|                |                                                                                                                     |             |
|----------------|---------------------------------------------------------------------------------------------------------------------|-------------|
| <i>CMQ213C</i> | Sigma subunit for chloroplast RNA polymerase                                                                        | 0.75 ± 0.07 |
| <i>CMC024C</i> | Ribosomal large subunit pseudouridine synthase D                                                                    | 0.75 ± 0.00 |
| <i>CMT370C</i> | Hypothetical protein                                                                                                | 0.75 ± 0.08 |
| <i>CMK285C</i> | Eukaryotic translation initiation factor eIF-3 subunit 9                                                            | 0.75 ± 0.05 |
| <i>CME172C</i> | P21-activated protein kinase                                                                                        | 0.75 ± 0.06 |
| <i>CMO209C</i> | Hypothetical protein                                                                                                | 0.75 ± 0.08 |
| <i>CMM006C</i> | Hypothetical protein                                                                                                | 0.75 ± 0.02 |
| <i>CMJ024C</i> | Similar to plant adhesion molecule 1 (PAM1)                                                                         | 0.75 ± 0.04 |
| <i>CMN207C</i> | Similar to ribulose-1,5 bisphosphate carboxylase/oxygenase large subunit N-methyltransferase, chloroplast precursor | 0.75 ± 0.06 |
| <i>CMT274C</i> | Similar to alpha/beta hydrolase                                                                                     | 0.75 ± 0.06 |
| <i>CMP189C</i> | Similar to selenophosphate synthetase                                                                               | 0.75 ± 0.05 |
| <i>CMP090C</i> | Cyclin G associated kinase                                                                                          | 0.75 ± 0.08 |
| <i>CMD101C</i> | Unknown GTP-binding protein                                                                                         | 0.74 ± 0.04 |
| <i>CMO220C</i> | Similar to UDP-galactose transporter                                                                                | 0.74 ± 0.05 |
| <i>CMR086C</i> | Hypothetical protein                                                                                                | 0.74 ± 0.08 |
| <i>CME165C</i> | Probable dimethyladenosine transferase                                                                              | 0.74 ± 0.05 |
| <i>CMJ089C</i> | 2-oxoglutarate dehydrogenase E2 component (dihydrolipoamide succinyltransferase)                                    | 0.74 ± 0.10 |
| <i>CMG200C</i> | 1-pyrroline-5-carboxylate dehydrogenase                                                                             | 0.74 ± 0.03 |
| <i>CMP124C</i> | Probable lactoylglutathione lyase                                                                                   | 0.74 ± 0.04 |
| <i>CMJ098C</i> | Similar to eukaryotic translation elongation factor 2 (eEF-2)                                                       | 0.74 ± 0.03 |
| <i>CMS027C</i> | Hypothetical protein                                                                                                | 0.74 ± 0.05 |
| <i>CMR132C</i> | Hypothetical protein                                                                                                | 0.74 ± 0.12 |
| <i>CMR463C</i> | Hypothetical protein                                                                                                | 0.74 ± 0.08 |
| <i>CMC152C</i> | Hypothetical protein                                                                                                | 0.74 ± 0.11 |
| <i>CMS317C</i> | Hypothetical protein                                                                                                | 0.74 ± 0.08 |
| <i>CMM293C</i> | Hypothetical protein                                                                                                | 0.74 ± 0.09 |
| <i>CMJ070C</i> | Similar to syntaxin binding protein                                                                                 | 0.74 ± 0.05 |
| <i>CMT347C</i> | Hypothetical protein                                                                                                | 0.74 ± 0.01 |
| <i>CMO100C</i> | Hypothetical protein                                                                                                | 0.74 ± 0.03 |
| <i>CMQ321C</i> | Hypothetical protein                                                                                                | 0.74 ± 0.06 |
| <i>CMR106C</i> | Hypothetical protein                                                                                                | 0.74 ± 0.02 |
| <i>CMT374C</i> | Zinc-finger protein                                                                                                 | 0.74 ± 0.02 |
| <i>CMO169C</i> | Similar to proliferation related acidic leucine rich protein PAL31                                                  | 0.74 ± 0.02 |
| <i>CMP130C</i> | Similar to microtubule-associated protein                                                                           | 0.74 ± 0.06 |
| <i>CMF097C</i> | D-ribulokinase, ribitol kinase                                                                                      | 0.74 ± 0.04 |
| <i>CMJ223C</i> | Similar to actin-related protein                                                                                    | 0.74 ± 0.10 |
| <i>CMH040C</i> | Similar to glutamine amidotransferase class I                                                                       | 0.74 ± 0.06 |
| <i>CMQ451C</i> | Hypothetical protein                                                                                                | 0.74 ± 0.02 |
| <i>CMO249C</i> | Similar to short-chain dehydrogenase                                                                                | 0.74 ± 0.05 |
| <i>CMP312C</i> | DBF2-related serine/threonine kinase Orb6                                                                           | 0.74 ± 0.03 |
| <i>CMR152C</i> | Homeobox protein                                                                                                    | 0.74 ± 0.05 |
| <i>CMR397C</i> | Eukaryotic translation initiation factor eIF-2B epsilon subunit                                                     | 0.74 ± 0.03 |
| <i>CMN254C</i> | Hypothetical protein                                                                                                | 0.74 ± 0.04 |

|                |                                                                                                                                             |             |
|----------------|---------------------------------------------------------------------------------------------------------------------------------------------|-------------|
| <i>CMJ132C</i> | Hypothetical protein                                                                                                                        | 0.74 ± 0.02 |
| <i>CME158C</i> | Similar to UGA suppressor tRNA-associated antigenic protein                                                                                 | 0.74 ± 0.05 |
| <i>CMF056C</i> | NADH dehydrogenase type II                                                                                                                  | 0.74 ± 0.09 |
| <i>CMO146C</i> | Similar to glutamine cyclotransferase                                                                                                       | 0.74 ± 0.11 |
| <i>CMF014C</i> | Hypothetical protein                                                                                                                        | 0.74 ± 0.05 |
| <i>CMT390C</i> | Hypothetical protein                                                                                                                        | 0.74 ± 0.06 |
| <i>CMT571C</i> | Probable adenylate kinase, chloroplast precursor                                                                                            | 0.74 ± 0.12 |
| <i>CMJ229C</i> | MutS family DNA mismatch repair protein MSH6                                                                                                | 0.74 ± 0.09 |
| <i>CMQ436C</i> | Glycolate oxidase, peroxysomal                                                                                                              | 0.74 ± 0.03 |
| <i>CMQ081C</i> | Hypothetical protein                                                                                                                        | 0.74 ± 0.02 |
| <i>CMT633C</i> | Ribulose-5-phosphate 3-epimerase                                                                                                            | 0.74 ± 0.03 |
| <i>CMS354C</i> | Eukaryotic translation initiation factor eIF-3 subunit 3                                                                                    | 0.74 ± 0.02 |
| <i>CMS467C</i> | ATP-binding cassette, sub-family G (WBC), member 2                                                                                          | 0.74 ± 0.03 |
| <i>CMR253C</i> | Hypothetical protein                                                                                                                        | 0.74 ± 0.02 |
| <i>CMT244C</i> | Vesicle-inducing protein in plastids 1 VIPP1                                                                                                | 0.74 ± 0.03 |
| <i>CML268C</i> | Hypothetical protein                                                                                                                        | 0.74 ± 0.04 |
| <i>CMK277C</i> | Hypothetical protein                                                                                                                        | 0.74 ± 0.13 |
| <i>CMK215C</i> | Hypothetical protein                                                                                                                        | 0.74 ± 0.06 |
| <i>CMT077C</i> | Similar to auxin-regulated protein                                                                                                          | 0.74 ± 0.03 |
| <i>CMP289C</i> | Similar to phytoene desaturase precursor                                                                                                    | 0.74 ± 0.02 |
| <i>CMJ220C</i> | Hypothetical protein                                                                                                                        | 0.74 ± 0.07 |
| <i>CMT318C</i> | Chaperonin containing TCP1, subunit 8 (theta)                                                                                               | 0.74 ± 0.04 |
| <i>CMT116C</i> | Hypothetical protein                                                                                                                        | 0.74 ± 0.02 |
| <i>CMP137C</i> | Similar to RAN binding protein                                                                                                              | 0.74 ± 0.07 |
| <i>CMN109C</i> | Similar to ahpc/TSA family protein                                                                                                          | 0.74 ± 0.04 |
| <i>CML292C</i> | Hypothetical protein                                                                                                                        | 0.74 ± 0.02 |
| <i>CMH282C</i> | Similar to trefoil factor                                                                                                                   | 0.74 ± 0.09 |
| <i>CML194C</i> | Phosphoribosylaminoimidazolecarboxamide formyltransferase (AICAR transformylase) / IMP cyclohydrolase (inosinicase) (IMP synthetase) (ATIC) | 0.74 ± 0.07 |
| <i>CME053C</i> | Unknown M20/M25/M40 family peptidase                                                                                                        | 0.74 ± 0.08 |
| <i>CMH056C</i> | Protein kinase YAK1                                                                                                                         | 0.74 ± 0.02 |
| <i>CMT351C</i> | Eukaryotic translation initiation factor eIF-6                                                                                              | 0.74 ± 0.02 |
| <i>CMQ459C</i> | UDP-glucose:glycoprotein glucosyltransferase, precursor                                                                                     | 0.74 ± 0.08 |
| <i>CMB128C</i> | ATP citrate lyase                                                                                                                           | 0.74 ± 0.09 |
| <i>CMJ196C</i> | Hypothetical protein                                                                                                                        | 0.74 ± 0.05 |
| <i>CMK194C</i> | Hypothetical protein                                                                                                                        | 0.74 ± 0.07 |
| <i>CMR384C</i> | Ubiquitin-specific protease                                                                                                                 | 0.73 ± 0.09 |
| <i>CMS212C</i> | Mitochondrial ribosomal protein S17 precursor                                                                                               | 0.73 ± 0.08 |
| <i>CMK268C</i> | Hypothetical protein                                                                                                                        | 0.73 ± 0.07 |
| <i>CMO056C</i> | Probable importin beta gene                                                                                                                 | 0.73 ± 0.05 |
| <i>CMS024C</i> | Prolyl-tRNA synthetase                                                                                                                      | 0.73 ± 0.04 |
| <i>CMQ391C</i> | Hypothetical protein                                                                                                                        | 0.73 ± 0.04 |
| <i>CMT512C</i> | Hypothetical protein                                                                                                                        | 0.73 ± 0.09 |
| <i>CMS168C</i> | Hypothetical protein                                                                                                                        | 0.73 ± 0.07 |

|                |                                                                       |             |
|----------------|-----------------------------------------------------------------------|-------------|
| <i>CMIO50C</i> | Catalase                                                              | 0.73 ± 0.04 |
| <i>CMT205C</i> | Hypothetical protein                                                  | 0.73 ± 0.11 |
| <i>CMQ406C</i> | Similar to splicing factor 3a, subunit 3                              | 0.73 ± 0.08 |
| <i>CMQ389C</i> | Hypothetical protein                                                  | 0.73 ± 0.15 |
| <i>CMK267C</i> | Hypothetical protein                                                  | 0.73 ± 0.01 |
| <i>CMO192C</i> | Hypothetical protein                                                  | 0.73 ± 0.07 |
| <i>CMP092C</i> | Hypothetical protein                                                  | 0.73 ± 0.08 |
| <i>CME123C</i> | Hypothetical protein                                                  | 0.73 ± 0.04 |
| <i>CMA010C</i> | Hypothetical protein                                                  | 0.73 ± 0.06 |
| <i>CMD079C</i> | Hypothetical protein                                                  | 0.73 ± 0.01 |
| <i>CMR092C</i> | Hypothetical protein                                                  | 0.73 ± 0.04 |
| <i>CMP354C</i> | Probable Na <sup>+</sup> -dependent inorganic phosphate cotransporter | 0.73 ± 0.08 |
| <i>CMIO21C</i> | Hypothetical protein                                                  | 0.73 ± 0.06 |
| <i>CMC017C</i> | Similar to avirulence induced gene (AIG) 2                            | 0.73 ± 0.03 |
| <i>CMS207C</i> | Similar to plant adhesion molecule 1, PAM1                            | 0.73 ± 0.07 |
| <i>CMS114C</i> | RNA polymerase I second largest subunit                               | 0.73 ± 0.05 |
| <i>CMII32C</i> | U3 snoRNP component Sof1p                                             | 0.73 ± 0.06 |
| <i>CMN063C</i> | Hypothetical protein                                                  | 0.73 ± 0.13 |
| <i>CMK019C</i> | Similar to low affinity potassium transport; Trk2p                    | 0.73 ± 0.03 |
| <i>CMN301C</i> | Similar to oxysterol-binding protein                                  | 0.73 ± 0.01 |
| <i>CMT625C</i> | Ppgpp synthetase/hydrolase Rel                                        | 0.73 ± 0.03 |
| <i>CMM076C</i> | Probable cryptochrome 1                                               | 0.73 ± 0.11 |
| <i>CMO185C</i> | Similar to hedgehog protein                                           | 0.73 ± 0.01 |
| <i>CMK133C</i> | Hypothetical protein                                                  | 0.73 ± 0.03 |
| <i>CMC040C</i> | Hypothetical protein                                                  | 0.73 ± 0.02 |
| <i>CMS264C</i> | Unknown dehydrogenase                                                 | 0.73 ± 0.13 |
| <i>CMQ171C</i> | Sm protein F                                                          | 0.73 ± 0.08 |
| <i>CMJ133C</i> | Similar to epsin                                                      | 0.73 ± 0.08 |
| <i>CMP013C</i> | Probable suppressor protein of mitochondrial histone mutant           | 0.73 ± 0.05 |
| <i>CMQ343C</i> | Hypothetical protein                                                  | 0.73 ± 0.09 |
| <i>CMQ155C</i> | Hypothetical protein                                                  | 0.73 ± 0.05 |
| <i>CMS166C</i> | Similar to tetracycline resistance protein TetA                       | 0.73 ± 0.06 |
| <i>CMQ396C</i> | Hypothetical protein                                                  | 0.73 ± 0.08 |
| <i>CMT213C</i> | Hypothetical protein                                                  | 0.73 ± 0.07 |
| <i>CMT435C</i> | 2C-methyl-D-erythritol 2,4-cyclodiphosphate synthase                  | 0.73 ± 0.07 |
| <i>CMS312C</i> | Hypothetical protein                                                  | 0.73 ± 0.09 |
| <i>CMR103C</i> | DNA polymerase zeta catalytic subunit                                 | 0.73 ± 0.08 |
| <i>CMR355C</i> | Hypothetical protein                                                  | 0.73 ± 0.04 |
| <i>CMT128C</i> | Hypothetical protein                                                  | 0.73 ± 0.06 |
| <i>CMIO80C</i> | Hypothetical protein                                                  | 0.73 ± 0.08 |
| <i>CMS010C</i> | Hypothetical protein                                                  | 0.72 ± 0.03 |
| <i>CMC111C</i> | Transcription-repair coupling factor                                  | 0.72 ± 0.03 |
| <i>CMQ324C</i> | Polyribonucleotide nucleotidyltransferase                             | 0.72 ± 0.03 |

|                |                                                                  |             |
|----------------|------------------------------------------------------------------|-------------|
| <i>CMO347C</i> | MYB-related protein                                              | 0.72 ± 0.10 |
| <i>CMB130C</i> | SnRNP core Sm-like protein SmX5                                  | 0.72 ± 0.06 |
| <i>CMS202C</i> | FAD synthetase (FMN adenyleltransferase) FAD1                    | 0.72 ± 0.03 |
| <i>CMF124C</i> | Hypothetical protein                                             | 0.72 ± 0.06 |
| <i>CMO208C</i> | 2-isopropylmalate synthase                                       | 0.72 ± 0.11 |
| <i>CMC033C</i> | Hypothetical protein                                             | 0.72 ± 0.08 |
| <i>CMI026C</i> | Similar to cyclin M2                                             | 0.72 ± 0.05 |
| <i>CMK010C</i> | Hypothetical protein                                             | 0.72 ± 0.01 |
| <i>CMT581C</i> | Hypothetical protein                                             | 0.72 ± 0.03 |
| <i>CMC144C</i> | Hypothetical protein                                             | 0.72 ± 0.07 |
| <i>CMT210C</i> | Hypothetical protein                                             | 0.72 ± 0.07 |
| <i>CMH060C</i> | Eukaryotic translation initiation factor eIF-3 subunit 10        | 0.72 ± 0.04 |
| <i>CMN336C</i> | Acetyl-CoA synthetase (ADP-forming)                              | 0.72 ± 0.03 |
| <i>CMQ456C</i> | Probable apyrase                                                 | 0.72 ± 0.03 |
| <i>CMM130C</i> | Hypothetical protein                                             | 0.72 ± 0.06 |
| <i>CMB097C</i> | Hypothetical protein                                             | 0.72 ± 0.05 |
| <i>CMS180C</i> | Hypothetical protein                                             | 0.72 ± 0.05 |
| <i>CMB080C</i> | Hypothetical protein                                             | 0.72 ± 0.05 |
| <i>CMI304C</i> | Mitochondrial ribosomal protein S1 precursor                     | 0.72 ± 0.06 |
| <i>CMI225C</i> | Similar to RNA polymerase II transcriptional coactivator         | 0.72 ± 0.08 |
| <i>CMQ369C</i> | Similar to submergence induced, nickel-binding protein           | 0.72 ± 0.10 |
| <i>CMR123C</i> | Similar to histidinol-phosphate aminotransferase                 | 0.72 ± 0.13 |
| <i>CMI216C</i> | Probable mitochondrial intermembrane space complex subunit Tim8  | 0.72 ± 0.08 |
| <i>CMP083C</i> | Uroporphyrinogen decarboxylase                                   | 0.72 ± 0.04 |
| <i>CMT605C</i> | Box C/D snoRNP component Nop58                                   | 0.72 ± 0.06 |
| <i>CML327C</i> | Hypothetical protein                                             | 0.72 ± 0.08 |
| <i>CMS084C</i> | Hypothetical protein                                             | 0.72 ± 0.07 |
| <i>CMH168C</i> | Pre-mRNA splicing factor PRP8                                    | 0.72 ± 0.00 |
| <i>CMQ173C</i> | Tousled-like kinase                                              | 0.72 ± 0.05 |
| <i>CMR245C</i> | LAMMER-like dual specificity kinase                              | 0.72 ± 0.05 |
| <i>CMH140C</i> | Hypothetical protein                                             | 0.72 ± 0.05 |
| <i>CMR066C</i> | Succinate-semialdehyde dehydrogenase (NADP <sup>+</sup> ) (SSDH) | 0.72 ± 0.08 |
| <i>CMT547C</i> | Probable starch associated protein R1                            | 0.72 ± 0.05 |
| <i>CMA130C</i> | Hypothetical protein                                             | 0.72 ± 0.02 |
| <i>CMI201C</i> | Hypothetical protein                                             | 0.72 ± 0.07 |
| <i>CMS028C</i> | Hypothetical protein                                             | 0.72 ± 0.05 |
| <i>CMC110C</i> | Similar to transcription elongation factor TFIIS.h               | 0.72 ± 0.03 |
| <i>CMR185C</i> | E3 ubiquitin ligase SCF complex F-box protein subunit            | 0.72 ± 0.06 |
| <i>CMJ053C</i> | Hypothetical protein                                             | 0.71 ± 0.10 |
| <i>CMB144C</i> | Similar to suppressor of Ty 6 Spt6                               | 0.71 ± 0.04 |
| <i>CMQ073C</i> | Hypothetical protein                                             | 0.71 ± 0.07 |
| <i>CML296C</i> | Hypothetical protein                                             | 0.71 ± 0.01 |
| <i>CMO223C</i> | Hypothetical protein                                             | 0.71 ± 0.07 |

|                |                                                                        |      |   |      |
|----------------|------------------------------------------------------------------------|------|---|------|
| <i>CMS440C</i> | ATP-dependent Clp protease proteolytic subunit                         | 0.71 | ± | 0.08 |
| <i>CMS078C</i> | 3-isopropylmalate dehydratase                                          | 0.71 | ± | 0.03 |
| <i>CMS489C</i> | Hypothetical protein                                                   | 0.71 | ± | 0.04 |
| <i>CMR019C</i> | Similar to ribosomal processing, RNA binding, nucleolar protein Nop77  | 0.71 | ± | 0.05 |
| <i>CMC181C</i> | Similar to translocon at the inner envelope membrane Tic22             | 0.71 | ± | 0.06 |
| <i>CML083C</i> | 2,3-dihydro-2,3-dihydroxybenzoate dehydrogenase                        | 0.71 | ± | 0.03 |
| <i>CMK189C</i> | Hypothetical protein                                                   | 0.71 | ± | 0.05 |
| <i>CMP267C</i> | Similar to phosphatidic acid-preferring phospholipase A1               | 0.71 | ± | 0.01 |
| <i>CMJ255C</i> | Similar to gamma-tubulin complex protein 2                             | 0.71 | ± | 0.02 |
| <i>CMS333C</i> | Hypothetical protein                                                   | 0.71 | ± | 0.03 |
| <i>CMQ429C</i> | Centromere protein E, CENP-E protein                                   | 0.71 | ± | 0.04 |
| <i>CMJ249C</i> | Similar to syntaxin                                                    | 0.71 | ± | 0.04 |
| <i>CMS089C</i> | Hypothetical protein                                                   | 0.71 | ± | 0.06 |
| <i>CMR272C</i> | Probable cyclophilin B; CYPB                                           | 0.71 | ± | 0.06 |
| <i>CMR423C</i> | Probable DNA helicase required for mitotic chromosome segregation CHL1 | 0.71 | ± | 0.01 |
| <i>CMD050C</i> | Protein phosphatase 2 regulatory subunit A                             | 0.71 | ± | 0.07 |
| <i>CMK170C</i> | Hypothetical protein                                                   | 0.71 | ± | 0.06 |
| <i>CMG196C</i> | Mitochondrial translation elongation factor G1 (EF-G1)                 | 0.71 | ± | 0.05 |
| <i>CMQ029C</i> | Arginine decarboxylase                                                 | 0.71 | ± | 0.08 |
| <i>CMK017C</i> | Similar to tuberin                                                     | 0.71 | ± | 0.08 |
| <i>CMN307C</i> | Hypothetical protein                                                   | 0.71 | ± | 0.07 |
| <i>CMT194C</i> | Nonsense-mediated mRNA decay protein 3                                 | 0.71 | ± | 0.05 |
| <i>CMM306C</i> | Hypothetical protein                                                   | 0.71 | ± | 0.10 |
| <i>CMD030C</i> | Hypothetical protein                                                   | 0.71 | ± | 0.09 |
| <i>CML190C</i> | Cell division cycle protein cdc23, TPR protein, APC8                   | 0.71 | ± | 0.04 |
| <i>CMK223C</i> | Similar to mitochondrial GTP binding protein trmE                      | 0.71 | ± | 0.03 |
| <i>CMO019C</i> | Unknown conserved AAA protein                                          | 0.71 | ± | 0.05 |
| <i>CMR233C</i> | Hypothetical protein                                                   | 0.71 | ± | 0.03 |
| <i>CMN250C</i> | Chloroplast signal recognition particle (SRP) receptor FtsY            | 0.71 | ± | 0.01 |
| <i>CME133C</i> | Hypothetical protein                                                   | 0.71 | ± | 0.05 |
| <i>CMJ286C</i> | Polyadenylate-binding protein                                          | 0.71 | ± | 0.09 |
| <i>CMB053C</i> | Probable xylulose kinase                                               | 0.71 | ± | 0.04 |
| <i>CMK141C</i> | Glycerate kinase, phosphoribulokinase/uridine kinase-like              | 0.71 | ± | 0.03 |
| <i>CMT333C</i> | Similar to inorganic phosphate transporter                             | 0.71 | ± | 0.05 |
| <i>CMF150C</i> | B regulatory subunit of protein phosphatase 2A                         | 0.71 | ± | 0.06 |
| <i>CMT427C</i> | Ruvb-like DNA/RNA helicase reptin                                      | 0.71 | ± | 0.04 |
| <i>CMO148C</i> | Transposon                                                             | 0.71 | ± | 0.12 |
| <i>CMB047C</i> | Hypothetical protein                                                   | 0.71 | ± | 0.04 |
| <i>CMP127C</i> | Hypothetical protein                                                   | 0.71 | ± | 0.06 |
| <i>CMP215C</i> | Copper-transporting P-type ATPase                                      | 0.71 | ± | 0.06 |
| <i>CMF117C</i> | Phosphoribulokinase                                                    | 0.71 | ± | 0.01 |
| <i>CMH129C</i> | Hypothetical protein                                                   | 0.71 | ± | 0.05 |
| <i>CMR221C</i> | Similar to dolichyl-phosphate-mannose--protein mannosyltransferase     | 0.71 | ± | 0.03 |



|                |                                                                                          |             |
|----------------|------------------------------------------------------------------------------------------|-------------|
| <i>CMB151C</i> | Adenylylsulfate kinase                                                                   | 0.71 ± 0.03 |
| <i>CMJ202C</i> | Similar to chloroplast import-associated channel Toc75                                   | 0.71 ± 0.04 |
| <i>CMS043C</i> | Probable transporter, Pfam sugar transporter                                             | 0.71 ± 0.04 |
| <i>CMP094C</i> | Hypothetical protein                                                                     | 0.71 ± 0.06 |
| <i>CMC113C</i> | Hypothetical protein                                                                     | 0.71 ± 0.09 |
| <i>CMP021C</i> | Probable two-component sensor histidine kinase                                           | 0.71 ± 0.03 |
| <i>CMB145C</i> | Hypothetical protein                                                                     | 0.71 ± 0.06 |
| <i>CMR052C</i> | Ferredoxin-NADP <sup>+</sup> reductase                                                   | 0.71 ± 0.02 |
| <i>CMG044C</i> | Pre-mRNA splicing factor ATP-dependent RNA helicase PRP22                                | 0.71 ± 0.08 |
| <i>CMC065C</i> | Hypothetical protein                                                                     | 0.71 ± 0.05 |
| <i>CME195C</i> | Hypothetical protein                                                                     | 0.71 ± 0.06 |
| <i>CMM179C</i> | Probable sulfur deprivation response regulator sac1                                      | 0.70 ± 0.05 |
| <i>CMH195C</i> | SWI/SNF complex compenent Snf2                                                           | 0.70 ± 0.09 |
| <i>CMT099C</i> | Hypothetical protein                                                                     | 0.70 ± 0.13 |
| <i>CMC037C</i> | Glycine--tRNA ligase, class II                                                           | 0.70 ± 0.06 |
| <i>CMF133C</i> | Ethanolaminephosphotransferase                                                           | 0.70 ± 0.04 |
| <i>CMQ146C</i> | Hypothetical protein                                                                     | 0.70 ± 0.09 |
| <i>CMT241C</i> | Calcium-transporting ATPase, endoplasimc reticulum type                                  | 0.70 ± 0.02 |
| <i>CMM239C</i> | Hypothetical protein                                                                     | 0.70 ± 0.03 |
| <i>CMD173C</i> | Hypothetical protein                                                                     | 0.70 ± 0.05 |
| <i>CMJ161C</i> | Hypothetical protein                                                                     | 0.70 ± 0.06 |
| <i>CMT431C</i> | Proteasome regulatory particle subunit                                                   | 0.70 ± 0.02 |
| <i>CMT480C</i> | Hypothetical protein                                                                     | 0.70 ± 0.09 |
| <i>CMS282C</i> | Probable DNA repair protein REV1, deoxycytidyl transferase                               | 0.70 ± 0.05 |
| <i>CMI147C</i> | Secreted protein (mpt70)                                                                 | 0.70 ± 0.06 |
| <i>CME033C</i> | Hypothetical protein                                                                     | 0.70 ± 0.03 |
| <i>CMI052C</i> | Probable sulfate permease                                                                | 0.70 ± 0.04 |
| <i>CMO046C</i> | Similar to PCAF histone acetylase complex subunit                                        | 0.70 ± 0.07 |
| <i>CMP106C</i> | Hypothetical protein                                                                     | 0.70 ± 0.04 |
| <i>CMC035C</i> | Hypothetical protein                                                                     | 0.70 ± 0.07 |
| <i>CMO023C</i> | Similar to rRNA biogenesis protein; rrp5 homolog; multiple S1 rna binding domain protein | 0.70 ± 0.05 |
| <i>CMH155C</i> | Similar to ATP-dependent DNA helicase RecQ                                               | 0.70 ± 0.05 |
| <i>CMK225C</i> | Hypothetical protein                                                                     | 0.70 ± 0.06 |
| <i>CMN139C</i> | CDK-activating kinase                                                                    | 0.70 ± 0.02 |
| <i>CMA054C</i> | Hypothetical protein                                                                     | 0.70 ± 0.10 |
| <i>CMR137C</i> | Similar to developmental gene, multi-sex-combs                                           | 0.70 ± 0.09 |
| <i>CMI144C</i> | Similar to ring finger protein                                                           | 0.70 ± 0.08 |
| <i>CMM068C</i> | Citrate synthase                                                                         | 0.70 ± 0.02 |
| <i>CMR004C</i> | Hypothetical protein                                                                     | 0.70 ± 0.07 |
| <i>CMD164C</i> | Similar to syntaxin binding protein Unc-18                                               | 0.70 ± 0.05 |
| <i>CMT107C</i> | Hypothetical protein                                                                     | 0.70 ± 0.09 |
| <i>CMC011C</i> | ATP-binding cassette, sub-family D (ALD), member 3                                       | 0.70 ± 0.11 |
| <i>CMT372C</i> | Hypothetical protein                                                                     | 0.70 ± 0.08 |

|                |                                                                       |             |
|----------------|-----------------------------------------------------------------------|-------------|
| <i>CMP323C</i> | Hypothetical protein                                                  | 0.70 ± 0.07 |
| <i>CML116C</i> | Hypothetical protein                                                  | 0.70 ± 0.05 |
| <i>CMJ107C</i> | Hypothetical protein                                                  | 0.70 ± 0.02 |
| <i>CME045C</i> | Hypothetical protein                                                  | 0.70 ± 0.02 |
| <i>CMS218C</i> | Similar to mitochondrial distribution and morphology; Mdm38p          | 0.70 ± 0.03 |
| <i>CMB121C</i> | Hypothetical protein                                                  | 0.70 ± 0.08 |
| <i>CMD070C</i> | Probable FKBP-type peptidyl-prolyl cis-trans isomerase                | 0.70 ± 0.04 |
| <i>CMO136C</i> | Coproporphyrinogen III oxidase                                        | 0.70 ± 0.17 |
| <i>CMN161C</i> | Similar to vegetatible incompatibility protein HET-E-1                | 0.70 ± 0.03 |
| <i>CMH174C</i> | Hypothetical protein                                                  | 0.70 ± 0.03 |
| <i>CMP283C</i> | Unknown zinc finger protein                                           | 0.70 ± 0.09 |
| <i>CMK258C</i> | Hypothetical protein                                                  | 0.69 ± 0.07 |
| <i>CMR246C</i> | Hypothetical protein                                                  | 0.69 ± 0.06 |
| <i>CMR078C</i> | Hypothetical protein                                                  | 0.69 ± 0.03 |
| <i>CMQ289C</i> | Glyoxylate reductase/hydroxypyruvate reductase                        | 0.69 ± 0.02 |
| <i>CML192C</i> | U5 small nuclear ribonucleoprotein 200 kDa helicase                   | 0.69 ± 0.01 |
| <i>CMN299C</i> | Similar to hedgehog protein                                           | 0.69 ± 0.07 |
| <i>CMK074C</i> | Similar to glutathione S-transferase                                  | 0.69 ± 0.07 |
| <i>CMT488C</i> | Glutamine-dependent NAD synthetase                                    | 0.69 ± 0.07 |
| <i>CMP088C</i> | Hypothetical protein                                                  | 0.69 ± 0.05 |
| <i>CMM019C</i> | Chloroplast ribosomal protein S1 precursor                            | 0.69 ± 0.19 |
| <i>CMT344C</i> | Hypothetical protein                                                  | 0.69 ± 0.07 |
| <i>CMR248C</i> | Probable PET127 (probable mitochondrial translation system component) | 0.69 ± 0.03 |
| <i>CMK293C</i> | AAA-type ATPase family protein                                        | 0.69 ± 0.05 |
| <i>CMK192C</i> | Sec61 alpha subunit                                                   | 0.69 ± 0.07 |
| <i>CMH236C</i> | Hypothetical protein                                                  | 0.69 ± 0.04 |
| <i>CMS184C</i> | Hypothetical protein                                                  | 0.69 ± 0.08 |
| <i>CMQ347C</i> | Probable D-lactate dehydrogenase (cytochrome)                         | 0.69 ± 0.03 |
| <i>CMM191C</i> | Hypothetical protein                                                  | 0.69 ± 0.04 |
| <i>CMR110C</i> | Similar to glutathione S-transferase                                  | 0.69 ± 0.07 |
| <i>CMS073C</i> | Eukaryotic translation initiation factor eIF-4G                       | 0.69 ± 0.10 |
| <i>CMO352C</i> | ATP-dependent RNA helicase                                            | 0.69 ± 0.06 |
| <i>CMS482C</i> | Probable N-acetyltransferase MAK3                                     | 0.69 ± 0.04 |
| <i>CMR212C</i> | Similar to vacuolar assembly protein Vps41                            | 0.69 ± 0.07 |
| <i>CMT167C</i> | Hypothetical protein                                                  | 0.69 ± 0.07 |
| <i>CMR219C</i> | Hypothetical protein                                                  | 0.69 ± 0.03 |
| <i>CMN193C</i> | Pepsin A precursor                                                    | 0.69 ± 0.05 |
| <i>CMK146C</i> | Hypothetical protein                                                  | 0.69 ± 0.01 |
| <i>CMT439C</i> | Probable histidinol-phosphate aminotransferase                        | 0.69 ± 0.04 |
| <i>CMS051C</i> | Hypothetical protein                                                  | 0.69 ± 0.06 |
| <i>CMD032C</i> | Hypothetical protein                                                  | 0.69 ± 0.06 |
| <i>CMT329C</i> | Unknown hydrolase                                                     | 0.69 ± 0.02 |
| <i>CMA024C</i> | Hypothetical protein                                                  | 0.69 ± 0.07 |

|                |                                                                                                      |             |
|----------------|------------------------------------------------------------------------------------------------------|-------------|
| <i>CMG159C</i> | Hypothetical protein                                                                                 | 0.69 ± 0.05 |
| <i>CMR441C</i> | Hypothetical protein                                                                                 | 0.69 ± 0.04 |
| <i>CMJ045C</i> | Hypothetical protein                                                                                 | 0.69 ± 0.07 |
| <i>CMH123C</i> | Hypothetical protein                                                                                 | 0.68 ± 0.08 |
| <i>CMB142C</i> | Similar to S2P metalloprotease                                                                       | 0.68 ± 0.06 |
| <i>CMD066C</i> | Hypothetical protein                                                                                 | 0.68 ± 0.04 |
| <i>CMD040C</i> | Similar to aospory-associated protein C                                                              | 0.68 ± 0.03 |
| <i>CMQ272C</i> | Hypothetical protein                                                                                 | 0.68 ± 0.05 |
| <i>CMF033C</i> | Nucleolar RNA helicase II/Gu                                                                         | 0.68 ± 0.10 |
| <i>CML121C</i> | Hypothetical protein                                                                                 | 0.68 ± 0.08 |
| <i>CMN308C</i> | Hypothetical protein                                                                                 | 0.68 ± 0.02 |
| <i>CMR173C</i> | Hypothetical protein                                                                                 | 0.68 ± 0.05 |
| <i>CMM162C</i> | Adenylosuccinate synthetase                                                                          | 0.68 ± 0.05 |
| <i>CMQ407C</i> | Hypothetical protein                                                                                 | 0.68 ± 0.05 |
| <i>CMQ352C</i> | Hypothetical protein                                                                                 | 0.68 ± 0.02 |
| <i>CMK030C</i> | Hypothetical protein                                                                                 | 0.68 ± 0.07 |
| <i>CMR337C</i> | Hypothetical protein                                                                                 | 0.68 ± 0.07 |
| <i>CMR409C</i> | Hypothetical protein                                                                                 | 0.68 ± 0.05 |
| <i>CMR167C</i> | Methylenetetrahydrofolate dehydrogenase (NADP <sup>+</sup> )/methenyltetrahydrofolate cyclohydrolase | 0.68 ± 0.11 |
| <i>CMK238C</i> | Hypothetical protein                                                                                 | 0.68 ± 0.04 |
| <i>CMT158C</i> | Hypothetical protein                                                                                 | 0.68 ± 0.03 |
| <i>CMQ067C</i> | Phosphomannomutase                                                                                   | 0.68 ± 0.05 |
| <i>CMS413C</i> | Hypothetical protein                                                                                 | 0.68 ± 0.08 |
| <i>CMQ054C</i> | Hypothetical protein                                                                                 | 0.68 ± 0.07 |
| <i>CMO043C</i> | Hypothetical protein                                                                                 | 0.68 ± 0.05 |
| <i>CMJ093C</i> | Similar to Na <sup>+</sup> /H <sup>+</sup> antiporter                                                | 0.68 ± 0.03 |
| <i>CMI226C</i> | Similar to ankyrin                                                                                   | 0.68 ± 0.03 |
| <i>CML205C</i> | Heat shock protein DnaK (HSP70)                                                                      | 0.68 ± 0.00 |
| <i>CMN153C</i> | Hypothetical protein                                                                                 | 0.68 ± 0.09 |
| <i>CMN129C</i> | Fusion protein of aspartate kinase and homoserine dehydrogenase                                      | 0.68 ± 0.11 |
| <i>CMR084C</i> | Hypothetical protein                                                                                 | 0.68 ± 0.04 |
| <i>CML228C</i> | Similar to serine/threonine kinase KIN82                                                             | 0.68 ± 0.04 |
| <i>CMS398C</i> | 1-aminocyclopropane-1-carboxylate synthase                                                           | 0.68 ± 0.06 |
| <i>CMT622C</i> | Hypothetical protein                                                                                 | 0.68 ± 0.00 |
| <i>CMH186C</i> | Hypothetical protein                                                                                 | 0.68 ± 0.06 |
| <i>CMT577C</i> | Hypothetical protein                                                                                 | 0.68 ± 0.03 |
| <i>CMJ134C</i> | CDP-diacylglycerol--glycerol-3-phosphate 3-phosphatidyltransferase                                   | 0.68 ± 0.06 |
| <i>CMA064C</i> | Unknown cyanobacterial protein                                                                       | 0.68 ± 0.10 |
| <i>CMM186C</i> | Hypothetical protein                                                                                 | 0.68 ± 0.06 |
| <i>CMT215C</i> | Hypothetical protein                                                                                 | 0.68 ± 0.05 |
| <i>CMI055C</i> | Mitochondrial ribosomal protein L24 precursor                                                        | 0.68 ± 0.10 |
| <i>CMB066C</i> | Hypothetical protein                                                                                 | 0.68 ± 0.06 |
| <i>CMG105C</i> | Probable WD-repeat membrane protein                                                                  | 0.68 ± 0.04 |

|                |                                                                              |             |
|----------------|------------------------------------------------------------------------------|-------------|
| <i>CMO008C</i> | Similar to ribonuclease P                                                    | 0.68 ± 0.02 |
| <i>CMC009C</i> | Similar to 3-hydroxyisobutyryl-Coenzyme A hydrolase                          | 0.68 ± 0.05 |
| <i>CMF182C</i> | Aminopeptidase N                                                             | 0.68 ± 0.06 |
| <i>CMJ034C</i> | bZIP transcription factor                                                    | 0.68 ± 0.06 |
| <i>CMK075C</i> | Hypothetical protein                                                         | 0.68 ± 0.03 |
| <i>CMG048C</i> | Coatomer protein complex, subunit beta                                       | 0.68 ± 0.08 |
| <i>CMH194C</i> | Similar to translational activator GCN1                                      | 0.67 ± 0.02 |
| <i>CMH117C</i> | RNA polymerase II second largest subunit                                     | 0.67 ± 0.06 |
| <i>CMN255C</i> | Hypothetical protein                                                         | 0.67 ± 0.05 |
| <i>CMS338C</i> | Hypothetical protein                                                         | 0.67 ± 0.06 |
| <i>CMR299C</i> | Stress-induced phosphoprotein STI1                                           | 0.67 ± 0.10 |
| <i>CMP278C</i> | Similar to acyl-coenzyme A-binding protein                                   | 0.67 ± 0.04 |
| <i>CMR240C</i> | Amidophoribosyltransferase                                                   | 0.67 ± 0.02 |
| <i>CMP064C</i> | Similar to solute carrier protein                                            | 0.67 ± 0.04 |
| <i>CMM189C</i> | 3-hydroxy-3-methylglutaryl-Coenzyme A synthase, cytoplasmic or mitochondrial | 0.67 ± 0.04 |
| <i>CMS177C</i> | Hypothetical protein                                                         | 0.67 ± 0.02 |
| <i>CMA013C</i> | Hypothetical protein                                                         | 0.67 ± 0.07 |
| <i>CMN318C</i> | Hypothetical protein                                                         | 0.67 ± 0.09 |
| <i>CMO107C</i> | ATP-dependent RNA helicase                                                   | 0.67 ± 0.07 |
| <i>CMT342C</i> | Hypothetical protein                                                         | 0.67 ± 0.09 |
| <i>CMR085C</i> | Similar to nuclear RNA binding protein                                       | 0.67 ± 0.06 |
| <i>CMR121C</i> | Ketol-acid reductoisomerase                                                  | 0.67 ± 0.08 |
| <i>CMT288C</i> | Hypothetical protein                                                         | 0.67 ± 0.03 |
| <i>CMQ426C</i> | Similar to DNA polymerase lambda                                             | 0.67 ± 0.04 |
| <i>CMT290C</i> | Similar to TFIIF subunit SSL1                                                | 0.67 ± 0.06 |
| <i>CMR119C</i> | Hypothetical protein                                                         | 0.67 ± 0.03 |
| <i>CMN110C</i> | Hypothetical protein                                                         | 0.67 ± 0.11 |
| <i>CMT281C</i> | Hypothetical protein                                                         | 0.67 ± 0.01 |
| <i>CMJ038C</i> | Similar to hydrolase                                                         | 0.67 ± 0.08 |
| <i>CMH161C</i> | Hypothetical protein                                                         | 0.67 ± 0.11 |
| <i>CMJ294C</i> | Hypothetical protein                                                         | 0.67 ± 0.04 |
| <i>CMI161C</i> | Hypothetical protein                                                         | 0.67 ± 0.10 |
| <i>CMI123C</i> | Probable ribokinase                                                          | 0.67 ± 0.08 |
| <i>CMT178C</i> | Hypothetical protein                                                         | 0.67 ± 0.05 |
| <i>CMI180C</i> | Similar to magnesium transporter Mrs2p                                       | 0.67 ± 0.07 |
| <i>CMF045C</i> | Probable alpha-1,2-mannosidase, endoplasmic reticulum                        | 0.67 ± 0.08 |
| <i>CMM310C</i> | Hypothetical protein                                                         | 0.67 ± 0.02 |
| <i>CMT114C</i> | Similar to ribonuclease PH                                                   | 0.67 ± 0.04 |
| <i>CMN227C</i> | S-adenosylmethionine synthetase                                              | 0.67 ± 0.11 |
| <i>CMT538C</i> | Hypothetical protein                                                         | 0.67 ± 0.08 |
| <i>CMT432C</i> | Similar to charged amino acid rich leucine zipper factor-1                   | 0.67 ± 0.16 |
| <i>CMD180C</i> | GATA transcription factor                                                    | 0.67 ± 0.05 |
| <i>CMN058C</i> | Hypothetical protein                                                         | 0.67 ± 0.09 |

|                |                                                                |             |
|----------------|----------------------------------------------------------------|-------------|
| <i>CMN257C</i> | Similar to DNMT1 associated protein 1                          | 0.66 ± 0.05 |
| <i>CMK289C</i> | 20S core proteasome subunit beta 2                             | 0.66 ± 0.09 |
| <i>CME144C</i> | Hypothetical protein                                           | 0.66 ± 0.01 |
| <i>CMQ120C</i> | 3-deoxy-7-phosphoheptulonate synthase                          | 0.66 ± 0.05 |
| <i>CMS243C</i> | DNA gyrase subunit A precursor                                 | 0.66 ± 0.04 |
| <i>CMQ136C</i> | Unknown PPR repeat protein                                     | 0.66 ± 0.04 |
| <i>CMM180C</i> | Hypothetical protein                                           | 0.66 ± 0.07 |
| <i>CMP341C</i> | Similar to phytoene dehydrogenase                              | 0.66 ± 0.11 |
| <i>CM1251C</i> | Heat shock protein ClpB                                        | 0.66 ± 0.05 |
| <i>CML183C</i> | Hypothetical protein                                           | 0.66 ± 0.07 |
| <i>CMQ423C</i> | Hypothetical protein                                           | 0.66 ± 0.02 |
| <i>CMP200C</i> | Similar to bestrophin                                          | 0.66 ± 0.02 |
| <i>CMJ043C</i> | Phycocyanobilin lyase alpha subunit                            | 0.66 ± 0.05 |
| <i>CMQ259C</i> | Hypothetical protein                                           | 0.66 ± 0.09 |
| <i>CML262C</i> | Integral membrane protein                                      | 0.66 ± 0.09 |
| <i>CMQ399C</i> | Hypothetical protein                                           | 0.66 ± 0.02 |
| <i>CME162C</i> | Rub1-conjugating enzyme E2                                     | 0.66 ± 0.07 |
| <i>CML088C</i> | Similar to chaperone grpE                                      | 0.66 ± 0.06 |
| <i>CMD092C</i> | Hypothetical protein                                           | 0.66 ± 0.04 |
| <i>CMQ087C</i> | Chloroplast F-type ATPase CF1 subunit gamma, precursor         | 0.66 ± 0.01 |
| <i>CMK011C</i> | 3-dehydroquinase synthase                                      | 0.66 ± 0.02 |
| <i>CME153C</i> | Phosphatidylinositol-4-phosphate 5-kinase                      | 0.66 ± 0.04 |
| <i>CMO244C</i> | Inner mitochondrial membrane protein Sco1p                     | 0.66 ± 0.10 |
| <i>CMR427C</i> | Hypothetical protein                                           | 0.66 ± 0.12 |
| <i>CMP143C</i> | Hypothetical protein                                           | 0.66 ± 0.03 |
| <i>CMJ016C</i> | Aspartate kinase                                               | 0.66 ± 0.05 |
| <i>CMP331C</i> | Hypothetical protein                                           | 0.66 ± 0.06 |
| <i>CML120C</i> | Hypothetical protein                                           | 0.66 ± 0.07 |
| <i>CMR493C</i> | GATA transcription factor                                      | 0.66 ± 0.04 |
| <i>CML204C</i> | Prephenate dehydratase PDT                                     | 0.66 ± 0.13 |
| <i>CMT028C</i> | Mn superoxide dismutase                                        | 0.66 ± 0.03 |
| <i>CMJ042C</i> | Glyceraldehyde-3-phosphate dehydrogenase                       | 0.65 ± 0.06 |
| <i>CMS127C</i> | Similar to nucleolar phosphoprotein                            | 0.65 ± 0.17 |
| <i>CMK191C</i> | Hypothetical protein                                           | 0.65 ± 0.02 |
| <i>CMP100C</i> | Hypothetical protein                                           | 0.65 ± 0.02 |
| <i>CMK308C</i> | Short chain dehydrogenase                                      | 0.65 ± 0.02 |
| <i>CMS074C</i> | Hypothetical protein                                           | 0.65 ± 0.06 |
| <i>CMM044C</i> | Box H/ACA snoRNP rRNA pseudouridine syntase component dyskerin | 0.65 ± 0.13 |
| <i>CMP058C</i> | Similar to ferredoxin-thioredoxin reductase, variable chain    | 0.65 ± 0.14 |
| <i>CMG199C</i> | Hypothetical protein                                           | 0.65 ± 0.05 |
| <i>CMP294C</i> | 26S proteasome ATP-dependent regulatory subunit                | 0.65 ± 0.03 |
| <i>CMM158C</i> | Chloroplast ascorbate hydrogen peroxidase, precursor           | 0.65 ± 0.06 |
| <i>CMO306C</i> | Probable myo-inositol dehydrogenase                            | 0.65 ± 0.06 |

|                |                                                                               |      |   |      |
|----------------|-------------------------------------------------------------------------------|------|---|------|
| <i>CMT211C</i> | Similar to U3 snoRNP component Utp11p                                         | 0.65 | ± | 0.11 |
| <i>CMA040C</i> | Citrate synthase                                                              | 0.65 | ± | 0.12 |
| <i>CMP134C</i> | Similar to transcriptional adaptor like protein                               | 0.65 | ± | 0.06 |
| <i>CMT615C</i> | Hypothetical protein                                                          | 0.65 | ± | 0.07 |
| <i>CMS209C</i> | Mitochondrial inner membrane insertion complex subunit Tim22                  | 0.65 | ± | 0.01 |
| <i>CMJ099C</i> | Formate--tetrahydrofolate ligase                                              | 0.65 | ± | 0.03 |
| <i>CMK034C</i> | Hypothetical protein                                                          | 0.65 | ± | 0.05 |
| <i>CMT018C</i> | Probable N-terminal acetyltransferase                                         | 0.65 | ± | 0.02 |
| <i>CMQ284C</i> | Similar to cation/proton antiporter                                           | 0.65 | ± | 0.06 |
| <i>CMO042C</i> | Hypothetical protein                                                          | 0.65 | ± | 0.05 |
| <i>CMO151C</i> | Hypothetical protein                                                          | 0.65 | ± | 0.05 |
| <i>CML256C</i> | Hypothetical protein                                                          | 0.64 | ± | 0.09 |
| <i>CMG041C</i> | Unknown permease                                                              | 0.64 | ± | 0.03 |
| <i>CMT089C</i> | Electron transfer flavoprotein-ubiquinone oxidoreductase                      | 0.64 | ± | 0.06 |
| <i>CML254C</i> | Hypothetical protein                                                          | 0.64 | ± | 0.06 |
| <i>CMC047C</i> | Hypothetical protein                                                          | 0.64 | ± | 0.02 |
| <i>CMT175C</i> | Similar to long chain fatty acid elongation enzyme Elo1p                      | 0.64 | ± | 0.11 |
| <i>CMR293C</i> | Hypothetical protein                                                          | 0.64 | ± | 0.09 |
| <i>CMO006C</i> | Hypothetical protein                                                          | 0.64 | ± | 0.02 |
| <i>CMO183C</i> | Hypothetical protein                                                          | 0.64 | ± | 0.09 |
| <i>CML273C</i> | 20S core proteasome subunit alpha 2                                           | 0.64 | ± | 0.04 |
| <i>CMQ383C</i> | Histidine biosynthesis bifunctional protein HisiE                             | 0.64 | ± | 0.06 |
| <i>CMG132C</i> | Similar to acetylpolyamine aminohydolase                                      | 0.64 | ± | 0.06 |
| <i>CME103C</i> | Hypothetical protein                                                          | 0.64 | ± | 0.14 |
| <i>CMQ089C</i> | Probable protease                                                             | 0.64 | ± | 0.07 |
| <i>CMM279C</i> | Similar to tellurium resistance protein TerC                                  | 0.64 | ± | 0.10 |
| <i>CMQ097C</i> | Probable ATP-dependent protease Lon                                           | 0.64 | ± | 0.09 |
| <i>CMT073C</i> | Methylcrotonoyl-Coenzyme A carboxylase 1 (alpha or biotin-containing subunit) | 0.64 | ± | 0.03 |
| <i>CMS430C</i> | Protein phosphatase 2A B55 regulatory subunit                                 | 0.64 | ± | 0.04 |
| <i>CMJ138C</i> | Similar to putative metal ion transporter                                     | 0.64 | ± | 0.06 |
| <i>CMK098C</i> | Acetyl-CoA synthetase                                                         | 0.64 | ± | 0.05 |
| <i>CMT214C</i> | Proliferating cell nuclear protein P120                                       | 0.64 | ± | 0.06 |
| <i>CMS147C</i> | Similar to SANT domain protein SMRTER                                         | 0.64 | ± | 0.11 |
| <i>CMT595C</i> | Hypothetical protein                                                          | 0.64 | ± | 0.07 |
| <i>CMT105C</i> | Nucleolar protein pescadillo                                                  | 0.64 | ± | 0.06 |
| <i>CME100C</i> | Acyl-coenzyme A:cholesterol acyltransferase; ACAT                             | 0.63 | ± | 0.03 |
| <i>CMB021C</i> | Chroloplast chaperonin CPN60, precursor                                       | 0.63 | ± | 0.02 |
| <i>CMN022C</i> | Hypothetical protein                                                          | 0.63 | ± | 0.11 |
| <i>CMQ203C</i> | Hypothetical protein                                                          | 0.63 | ± | 0.06 |
| <i>CMQ179C</i> | Hypothetical protein                                                          | 0.63 | ± | 0.10 |
| <i>CMM020C</i> | Hypothetical protein                                                          | 0.63 | ± | 0.05 |
| <i>CMO273C</i> | Hypothetical protein                                                          | 0.63 | ± | 0.01 |
| <i>CMG010C</i> | Similar to TFIIE large subunit                                                | 0.63 | ± | 0.09 |

|                |                                                                                                                         |             |
|----------------|-------------------------------------------------------------------------------------------------------------------------|-------------|
| <i>CML113C</i> | Hypothetical protein                                                                                                    | 0.63 ± 0.10 |
| <i>CMO267C</i> | Similar to ATP-dependent RNA helicase                                                                                   | 0.63 ± 0.07 |
| <i>CMS096C</i> | Sulfate adenylyltransferase                                                                                             | 0.63 ± 0.09 |
| <i>CML266C</i> | Hypothetical protein                                                                                                    | 0.63 ± 0.04 |
| <i>CMR008C</i> | Hypothetical protein                                                                                                    | 0.63 ± 0.04 |
| <i>CME151C</i> | GTP-binding protein of Nug1 family                                                                                      | 0.63 ± 0.03 |
| <i>CMQ114C</i> | Hypothetical protein                                                                                                    | 0.63 ± 0.09 |
| <i>CMQ021C</i> | Glutamate 5-kinase                                                                                                      | 0.63 ± 0.03 |
| <i>CME089C</i> | Similar to TBP-binding phosphoprotein DR1                                                                               | 0.63 ± 0.05 |
| <i>CMT604C</i> | Hypothetical protein                                                                                                    | 0.63 ± 0.04 |
| <i>CMT436C</i> | Hypothetical protein                                                                                                    | 0.63 ± 0.05 |
| <i>CMR073C</i> | Probable mitochondrial carrier proteins; Pet8p                                                                          | 0.63 ± 0.08 |
| <i>CMO044C</i> | Lysine--tRNA ligase class II, chloroplast or mitochondrial                                                              | 0.63 ± 0.04 |
| <i>CMT058C</i> | Phosphoribosylglycinamide formyltransferase (GAR transformylase, GART)<br>(5'-phosphoribosylglycinamide transformylase) | 0.63 ± 0.05 |
| <i>CMD154C</i> | Hypothetical protein                                                                                                    | 0.63 ± 0.06 |
| <i>CMJ081C</i> | Indole-3-glycerol phosphate synthase                                                                                    | 0.63 ± 0.10 |
| <i>CMT433C</i> | Transcription factor E2F                                                                                                | 0.63 ± 0.04 |
| <i>CMS289C</i> | Glutamine--tRNA ligase, chloroplast or mitochondrial?                                                                   | 0.63 ± 0.10 |
| <i>CMS431C</i> | Cytochrome c oxidase (Complex IV) assembly protein                                                                      | 0.63 ± 0.06 |
| <i>CMN230C</i> | Hypothetical protein                                                                                                    | 0.62 ± 0.05 |
| <i>CMQ244C</i> | Hypothetical protein                                                                                                    | 0.62 ± 0.05 |
| <i>CMT057C</i> | Hypothetical protein                                                                                                    | 0.62 ± 0.04 |
| <i>CML043C</i> | Hypothetical protein                                                                                                    | 0.62 ± 0.06 |
| <i>CMH144C</i> | 1,4-alpha-Glucan branching enzyme                                                                                       | 0.62 ± 0.11 |
| <i>CMF179C</i> | Hypothetical protein                                                                                                    | 0.62 ± 0.01 |
| <i>CMM184C</i> | Hypothetical protein                                                                                                    | 0.62 ± 0.03 |
| <i>CMO165C</i> | TATA-box binding protein-associated factor 9                                                                            | 0.62 ± 0.07 |
| <i>CMQ342C</i> | Similar to chloroplast inner membrane protein Tic110                                                                    | 0.62 ± 0.17 |
| <i>CMP304C</i> | Eukaryotic translation initiation factor eIF-2 gamma subunit                                                            | 0.62 ± 0.09 |
| <i>CMO212C</i> | Magnesium chelatase subunit H                                                                                           | 0.62 ± 0.04 |
| <i>CML127C</i> | Hypothetical protein                                                                                                    | 0.62 ± 0.07 |
| <i>CMJ142C</i> | Hypothetical protein                                                                                                    | 0.62 ± 0.04 |
| <i>CMQ270C</i> | Mitochondrial chaperonin Hsp60, precursor                                                                               | 0.62 ± 0.04 |
| <i>CMA061C</i> | Heat shock protein of Hsp90 family                                                                                      | 0.62 ± 0.09 |
| <i>CMP049C</i> | Hypothetical protein                                                                                                    | 0.62 ± 0.04 |
| <i>CMT183C</i> | Hypothetical protein                                                                                                    | 0.62 ± 0.06 |
| <i>CMA042C</i> | Acetyl-CoA acetyltransferase                                                                                            | 0.62 ± 0.10 |
| <i>CMQ031C</i> | Hypothetical protein                                                                                                    | 0.62 ± 0.02 |
| <i>CMF062C</i> | Mitochondrial general import pore subunit Tom40                                                                         | 0.62 ± 0.05 |
| <i>CMJ017C</i> | Hypothetical protein                                                                                                    | 0.62 ± 0.04 |
| <i>CMC066C</i> | Signal recognition particle SRP54 homolog ffh                                                                           | 0.61 ± 0.05 |
| <i>CMH162C</i> | Hypothetical protein                                                                                                    | 0.61 ± 0.03 |
| <i>CMR301C</i> | Hypothetical protein                                                                                                    | 0.61 ± 0.01 |

|                |                                                                                                                                                                 |             |
|----------------|-----------------------------------------------------------------------------------------------------------------------------------------------------------------|-------------|
| <i>CMT081C</i> | Plastid-lipid-associated protein PAP                                                                                                                            | 0.61 ± 0.10 |
| <i>CMP091C</i> | Similar to mRNA cap methyltransferase                                                                                                                           | 0.61 ± 0.05 |
| <i>CMT176C</i> | Hypothetical protein                                                                                                                                            | 0.61 ± 0.01 |
| <i>CMB048C</i> | 60S acidic ribosomal protein PO                                                                                                                                 | 0.61 ± 0.02 |
| <i>CMP174C</i> | Hypothetical protein                                                                                                                                            | 0.61 ± 0.03 |
| <i>CML178C</i> | Probable long chain fatty acid elongation enzyme Elo1p                                                                                                          | 0.61 ± 0.07 |
| <i>CMK157C</i> | Hypothetical protein                                                                                                                                            | 0.61 ± 0.04 |
| <i>CML202C</i> | Similar to SR family splicing factor SC35                                                                                                                       | 0.61 ± 0.04 |
| <i>CMN317C</i> | Hypothetical protein                                                                                                                                            | 0.61 ± 0.05 |
| <i>CMT246C</i> | Hypothetical protein                                                                                                                                            | 0.61 ± 0.07 |
| <i>CME146C</i> | Polo-like protein kinase                                                                                                                                        | 0.61 ± 0.01 |
| <i>CMQ336C</i> | Leucyl--tRNA ligase                                                                                                                                             | 0.60 ± 0.04 |
| <i>CMO259C</i> | Hypothetical protein                                                                                                                                            | 0.60 ± 0.01 |
| <i>CMK262C</i> | Hypothetical protein                                                                                                                                            | 0.60 ± 0.15 |
| <i>CMI185C</i> | Probable leucine aminopeptidase                                                                                                                                 | 0.60 ± 0.01 |
| <i>CMK028C</i> | Eukaryotic translation initiation factor eIF-4A                                                                                                                 | 0.60 ± 0.11 |
| <i>CMT056C</i> | Probable sodium-dependent transporter                                                                                                                           | 0.60 ± 0.05 |
| <i>CMN237C</i> | ATP-dependent Clp protease proteolytic subunit                                                                                                                  | 0.60 ± 0.01 |
| <i>CMQ281C</i> | Hypothetical protein                                                                                                                                            | 0.60 ± 0.01 |
| <i>CMS490C</i> | Probable malic acid transport protein, malate permease                                                                                                          | 0.60 ± 0.16 |
| <i>CMR368C</i> | Unknown amidotransferase                                                                                                                                        | 0.60 ± 0.05 |
| <i>CMH200C</i> | Similar to V-type ATPase V1 subunit G                                                                                                                           | 0.60 ± 0.01 |
| <i>CMQ040C</i> | Hypothetical protein                                                                                                                                            | 0.60 ± 0.10 |
| <i>CMT160C</i> | 60S ribosomal protein L24 homolog                                                                                                                               | 0.60 ± 0.03 |
| <i>CMO349C</i> | Similar to Machado-Joseph disease protein ataxin-3                                                                                                              | 0.60 ± 0.05 |
| <i>CMS105C</i> | Hypothetical protein                                                                                                                                            | 0.60 ± 0.08 |
| <i>CML030C</i> | DnaJ (Hsp40) homolog, subfamily A                                                                                                                               | 0.60 ± 0.09 |
| <i>CML234C</i> | Hypothetical protein                                                                                                                                            | 0.60 ± 0.02 |
| <i>CMP269C</i> | Hypothetical protein                                                                                                                                            | 0.60 ± 0.00 |
| <i>CMJ252C</i> | Probable rRNA methyltransferase pmt2                                                                                                                            | 0.60 ± 0.08 |
| <i>CMQ348C</i> | Eukaryotic translation initiation factor eIF-4F                                                                                                                 | 0.60 ± 0.10 |
| <i>CMT559C</i> | Similar to integrase interactor                                                                                                                                 | 0.59 ± 0.03 |
| <i>CMS203C</i> | Hypothetical protein                                                                                                                                            | 0.59 ± 0.07 |
| <i>CMJ135C</i> | Hypothetical protein                                                                                                                                            | 0.59 ± 0.00 |
| <i>CME023C</i> | Fusion protein of phosphoribosylaminoimidazole carboxylase and phosphoribosylaminoimidazole-succinocarboxamide synthase, chloroplast or mitochondrial precursor | 0.59 ± 0.11 |
| <i>CME188C</i> | GTP-binding protein of Obg family                                                                                                                               | 0.59 ± 0.04 |
| <i>CMD093C</i> | L-Galactono-1,4-lactone dehydrogenase                                                                                                                           | 0.59 ± 0.07 |
| <i>CMT181C</i> | Similar to ADP-ribosylation factor                                                                                                                              | 0.59 ± 0.01 |
| <i>CMH159C</i> | Eukaryotic translation initiation factor eIF-3 subunit 4                                                                                                        | 0.59 ± 0.06 |
| <i>CMT552C</i> | Hypothetical protein                                                                                                                                            | 0.59 ± 0.07 |
| <i>CMJ084C</i> | Phosphoribosylamine--glycine ligase (GARS) (glycinamide ribonucleotide synthetase) (phosphoribosylglycinamide synthetase)                                       | 0.59 ± 0.07 |
| <i>CMM200C</i> | Probable DNA binding protein                                                                                                                                    | 0.59 ± 0.07 |



|                |                                                                          |             |
|----------------|--------------------------------------------------------------------------|-------------|
| <i>CMC142C</i> | Hypothetical protein                                                     | 0.59 ± 0.05 |
| <i>CMG031C</i> | Hypothetical protein                                                     | 0.59 ± 0.03 |
| <i>CMT216C</i> | Isocitrate dehydrogenase, cytosolic                                      | 0.59 ± 0.02 |
| <i>CMK168C</i> | Hypothetical protein                                                     | 0.59 ± 0.05 |
| <i>CMH178C</i> | Similar to GTPase-activating protein                                     | 0.59 ± 0.05 |
| <i>CMM011C</i> | Hypothetical protein                                                     | 0.59 ± 0.06 |
| <i>CMT304C</i> | Hypothetical protein                                                     | 0.58 ± 0.06 |
| <i>CMR081C</i> | Similar to meiotic check point regulator                                 | 0.58 ± 0.05 |
| <i>CMG058C</i> | Unknown transmembrane protein                                            | 0.58 ± 0.02 |
| <i>CMR109C</i> | GTP-binding protein of tyra (tyrosine phosphorylated protein A) family   | 0.58 ± 0.04 |
| <i>CMK114C</i> | Similar to glucose-6-phosphate/phosphate-translocator precursor          | 0.58 ± 0.09 |
| <i>CMS291C</i> | Similar to FKBP-type peptidyl-prolyl cis-trans isomerase Mip             | 0.58 ± 0.08 |
| <i>CMN179C</i> | Mitochondrial presequence translocase subunit Tim50                      | 0.58 ± 0.03 |
| <i>CMQ277C</i> | Hypothetical protein                                                     | 0.58 ± 0.07 |
| <i>CME043C</i> | Hypothetical protein                                                     | 0.57 ± 0.02 |
| <i>CMK161C</i> | Hypothetical protein                                                     | 0.57 ± 0.01 |
| <i>CMQ033C</i> | Folypolyglutamate synthase/dihydrofolate synthase                        | 0.57 ± 0.03 |
| <i>CMR373C</i> | Short-chain dehydrogenases/reductases family (SDR),                      | 0.57 ± 0.03 |
| <i>CML047C</i> | Similar to mRNA-binding protein                                          | 0.57 ± 0.08 |
| <i>CMH207C</i> | Probable peptidylprolyl isomerase                                        | 0.57 ± 0.11 |
| <i>CMJ105C</i> | Similar to chloroplast inner membrane protein Tic22 (Guillardia theta)   | 0.57 ± 0.02 |
| <i>CMP203C</i> | Hypothetical protein                                                     | 0.57 ± 0.07 |
| <i>CMF187C</i> | Similar to ubiquitin-conjugating enzyme E2 variant                       | 0.57 ± 0.03 |
| <i>CMH230C</i> | Hypothetical protein                                                     | 0.57 ± 0.05 |
| <i>CMM066C</i> | Alanine aminotransferase                                                 | 0.57 ± 0.12 |
| <i>CMJ295C</i> | Hypothetical protein                                                     | 0.57 ± 0.01 |
| <i>CMG190C</i> | Unknown zinc finger protein                                              | 0.57 ± 0.08 |
| <i>CMC064C</i> | Eukaryotic translation initiation factor eIF-3 subunit 2                 | 0.57 ± 0.03 |
| <i>CMG099C</i> | Hypothetical protein                                                     | 0.57 ± 0.03 |
| <i>CMS294C</i> | Hypothetical protein                                                     | 0.57 ± 0.11 |
| <i>CMN019C</i> | Probable inorganic phosphate transporter protein                         | 0.57 ± 0.06 |
| <i>CMH145C</i> | Hypothetical protein                                                     | 0.57 ± 0.08 |
| <i>CMG123C</i> | Aspartate-semialdehyde dehydrogenase (AsA dehydrogenase)                 | 0.57 ± 0.09 |
| <i>CMT532C</i> | Hypothetical protein                                                     | 0.56 ± 0.06 |
| <i>CMB148C</i> | Probable mitochondrial intermembrane space complex subunit Tim13         | 0.56 ± 0.02 |
| <i>CMJ137C</i> | Hypothetical protein                                                     | 0.56 ± 0.02 |
| <i>CME183C</i> | Hypothetical protein                                                     | 0.56 ± 0.04 |
| <i>CMN204C</i> | Hypothetical protein                                                     | 0.56 ± 0.05 |
| <i>CMC118C</i> | Similar to oxidase (cytochrome c) assembly OXA1, mitochondrial precursor | 0.56 ± 0.06 |
| <i>CMR341C</i> | Similar to surfeit locus protein 4                                       | 0.56 ± 0.04 |
| <i>CMQ368C</i> | Unknown periplasmic-binding protein of ABC transporter                   | 0.56 ± 0.07 |
| <i>CMG023C</i> | Adenosylmethionine-8-amino-7-oxononanoate aminotransferase               | 0.56 ± 0.02 |
| <i>CMK187C</i> | Chloroplast translation elongation factor P (EF-P)                       | 0.55 ± 0.10 |

|                |                                                                           |             |
|----------------|---------------------------------------------------------------------------|-------------|
| <i>CMK024C</i> | Hypothetical protein                                                      | 0.55 ± 0.09 |
| <i>CML063C</i> | Hypothetical protein                                                      | 0.55 ± 0.00 |
| <i>CMQ113C</i> | Similar to translationally controlled tumor protein (TCTP) (p23)          | 0.55 ± 0.05 |
| <i>CMT520C</i> | Hypothetical protein                                                      | 0.55 ± 0.10 |
| <i>CME006C</i> | Hypothetical protein                                                      | 0.55 ± 0.02 |
| <i>CMJ218C</i> | Aspartate--tRNA ligase, cytoplasmic                                       | 0.55 ± 0.06 |
| <i>CMQ271C</i> | Similar to endonuclease                                                   | 0.54 ± 0.03 |
| <i>CMP010C</i> | Hypothetical protein                                                      | 0.54 ± 0.03 |
| <i>CMK043C</i> | MYB-related protein                                                       | 0.54 ± 0.05 |
| <i>CMF116C</i> | Unknown iron-sulfur protein                                               | 0.54 ± 0.03 |
| <i>CMC169C</i> | Hypothetical protein                                                      | 0.54 ± 0.06 |
| <i>CMR256C</i> | Spermine synthase                                                         | 0.54 ± 0.15 |
| <i>CMK035C</i> | Ribonucleoside-diphosphate reductase beta chain                           | 0.54 ± 0.00 |
| <i>CMK302C</i> | Hypothetical protein                                                      | 0.54 ± 0.01 |
| <i>CMI129C</i> | Hypothetical protein                                                      | 0.54 ± 0.09 |
| <i>CMS150C</i> | Hypothetical protein                                                      | 0.53 ± 0.06 |
| <i>CMQ279C</i> | Probable cytosolic purine 5' nucleotidase                                 | 0.53 ± 0.02 |
| <i>CMO345C</i> | Probable aldehyde dehydrogenase                                           | 0.53 ± 0.04 |
| <i>CMQ241C</i> | Probable plastid-specific ribosomal protein PSRP-1 precursor, chloroplast | 0.53 ± 0.01 |
| <i>CMH158C</i> | Hypothetical protein                                                      | 0.53 ± 0.03 |
| <i>CMJ234C</i> | Vitamine B12-independent methionine synthase                              | 0.52 ± 0.07 |
| <i>CMT192C</i> | Unknown mitochondrial carrier protein                                     | 0.52 ± 0.01 |
| <i>CMN310C</i> | Hypothetical protein                                                      | 0.52 ± 0.03 |
| <i>CMH224C</i> | Mitochondrial ribosomal protein L13 precursor                             | 0.52 ± 0.04 |
| <i>CMP340C</i> | 26S proteasome regulatory subunit                                         | 0.52 ± 0.02 |
| <i>CMI148C</i> | Probable trigger factor (proryl isomerase)                                | 0.52 ± 0.10 |
| <i>CMR237C</i> | Threonine 3-dehydrogenas                                                  | 0.51 ± 0.03 |
| <i>CMR353C</i> | Similar to respiratory burst oxidase protein                              | 0.51 ± 0.02 |
| <i>CMA048C</i> | 3-phosphoshikimate 1-carboxyvinyltransferase, chloroplast precursor       | 0.51 ± 0.03 |
| <i>CMC093C</i> | Hypothetical protein                                                      | 0.51 ± 0.06 |
| <i>CMG111C</i> | Alanine--tRNA ligase (chloroplast)                                        | 0.51 ± 0.07 |
| <i>CMJ288C</i> | Similar to DNA photolyase                                                 | 0.50 ± 0.03 |
| <i>CMS188C</i> | Probable chloroplast chaperonin CPN21, precursor                          | 0.50 ± 0.03 |
| <i>CMJ293C</i> | Citrate synthase                                                          | 0.50 ± 0.07 |
| <i>CMO071C</i> | Probable halotolerance protein HAL3                                       | 0.49 ± 0.01 |
| <i>CMT026C</i> | Hypothetical protein                                                      | 0.49 ± 0.01 |
| <i>CMS487C</i> | Hypothetical protein                                                      | 0.49 ± 0.12 |
| <i>CMA140C</i> | Mitotic control protein dis3                                              | 0.49 ± 0.04 |
| <i>CMP271C</i> | Similar to cyclophilin B                                                  | 0.49 ± 0.07 |
| <i>CMQ196C</i> | Hypothetical protein                                                      | 0.48 ± 0.01 |
| <i>CMJ130C</i> | Probable DNA photolyase (deoxyribodipyrimidine photolyase)                | 0.48 ± 0.07 |
| <i>CMK023C</i> | Hypothetical protein                                                      | 0.48 ± 0.08 |
| <i>CMI084C</i> | Ribulose-5-phosphate-3-epimerase precursor                                | 0.48 ± 0.01 |

|                |                                                                                 |             |
|----------------|---------------------------------------------------------------------------------|-------------|
| <i>CMP333C</i> | Similar to ubiquitin carboxyl-terminal hydrolase 10 (ubiquitin thioesterase 10) | 0.48 ± 0.04 |
| <i>CME120C</i> | Eukaryotic translation elongation factor 1 beta (eEF-1b)                        | 0.48 ± 0.09 |
| <i>CMB159C</i> | MYB-related protein                                                             | 0.47 ± 0.04 |
| <i>CMT424C</i> | Hypothetical protein                                                            | 0.47 ± 0.12 |
| <i>CMN177C</i> | Arginine--tRNA ligase                                                           | 0.46 ± 0.05 |
| <i>CMQ190C</i> | Hsp90 co-chaperone p23                                                          | 0.46 ± 0.01 |
| <i>CMR252C</i> | Hypothetical protein                                                            | 0.46 ± 0.03 |
| <i>CMQ088C</i> | Hypothetical protein                                                            | 0.45 ± 0.12 |
| <i>CMK150C</i> | Chloroplast translation elongation factor G (EF-G)                              | 0.44 ± 0.15 |
| <i>CMD051C</i> | Hypothetical protein                                                            | 0.43 ± 0.11 |
| <i>CMP252C</i> | Hypothetical protein                                                            | 0.43 ± 0.10 |
| <i>CMO245C</i> | Fructose-1,6-bisphosphatase precursor                                           | 0.42 ± 0.04 |
| <i>CMQ224C</i> | Heat shock protein of Hsp90 family                                              | 0.41 ± 0.03 |
| <i>CMR346C</i> | Probable LPS (Lipopolysaccharide) glycosyltransferase                           | 0.41 ± 0.08 |
| <i>CMJ206C</i> | Hypothetical protein                                                            | 0.37 ± 0.03 |
| <i>CMT423C</i> | Chloroplast molecular chaperone grpE                                            | 0.37 ± 0.01 |
| <i>CMT162C</i> | APS reductase                                                                   | 0.36 ± 0.02 |
| <i>CMN328C</i> | Probable phosphate/phosphoenolpyruvate translocator precursor                   | 0.36 ± 0.06 |

<sup>a</sup> Gene number and gene product in <http://merolae.biol.s.u-tokyo.ac.jp/>

<sup>b</sup> Values shown are means ± S.E. (*n*=4)
