# Supplementary material
Source: PubMed Central journal article supplement (PMC2718362)
Supplement: 0902790106_ST2_PDF.pdf [file 0902790106_ST2_PDF.pdf]

Table S2. Primers used for Northern blot analysis, confirmation of transformant, and cDNA synthesis

| Gene                             | Primer           | Sequence (5'-3')            |
|----------------------------------|------------------|-----------------------------|
| For Northern blot analysis       |                  |                             |
| <i>CmMYB1</i>                    | MYB(CMJ282C)-F   | GCTTGAGCGTCTCTCTGCTT        |
|                                  | MYB(CMJ282C)-R   | GTCTCCAGCGATGAGGAAAC        |
| <i>CmNRT</i>                     | NRT(CMG018C)-F   | GGTGCAGCAATACCCACTTT        |
|                                  | NRT(CMG018C)-R   | TCCAATGGTCGTCACITTTCA       |
| <i>CmNAR</i>                     | NR(CMG019C)-F    | TATTGGAGACACGGTGCAGGTCAAG   |
|                                  | NR(CMG019C)-R    | TGCACGCATCATCCTGAAATCCCGC   |
| <i>CmNIR</i>                     | NIR(CMG021C)-F   | ATCCGTTGACCGAGGTACTG        |
|                                  | NIR(CMG021C)-R   | TGCAGTCATCGGAGATGAAG        |
| <i>CmAMT</i>                     | AMT(CMT526C)-F   | TTTCGCTATGCTGACAGTGG        |
|                                  | AMT(CMT526C)-R   | AACCGATAAGCCGGAGAGAT        |
| <i>CmGS</i>                      | GS(CMI233C)-F    | ACGCTCCATCCTGACGTTAC        |
|                                  | GS(CMI233C)-R    | TCGCACATGACGAGAATGTT        |
| Histone H3<br>( <i>CMN176C</i> ) | CMN176_NT_F      | ATGGCGCGCACGAAACAAACTG      |
|                                  | CMN176_NT_R      | AGCCCGTTCACCACGGATG         |
| For confirmation of transformant |                  |                             |
| -                                | J282_TF_Check_F1 | ATCGCGCGGTATTGGCGCGAACTTA   |
| -                                | J282_TF_Check_R1 | TGCGTACTCTTGCCGACGAACCATA   |
| -                                | J282_TF_Check_F2 | GCTCTTCCAAGCTATCGAAGAAAAGG  |
| -                                | J282_TF_Check_R2 | AAGAGACCTGTGAGGCTCCTCTAAA   |
| -                                | URA_UP_R2        | CGCGCAATCATCCTCCCACTAGAAGAT |
| For cDNA synthesis               |                  |                             |
| <i>CmMYB1</i>                    | MYB1_RT_R1       | ACAGCAGTCCAAGCCTGAAT        |
| <i>CmNRT</i>                     | NRT_RT_R1        | ATGCGCATGAACACTGTACC        |
| <i>CmNIR</i>                     | NIR_RT_R1        | TTTATGGATGCCGTGGATTT        |
| <i>CmGS</i>                      | GS_RT_R1         | TTGGGCGACAGATCAATGT         |
