# Supplementary material
Source: PubMed Central journal article supplement (PMC2718362)
Supplement: 0902790106_ST3_PDF.pdf [file 0902790106_ST3_PDF.pdf]

Table S3. Primers used for QRT-PCR analysis

| Gene              | Primer       | Sequence (5'-3')          | Amplified region<br>(+1 as the TSS) |
|-------------------|--------------|---------------------------|-------------------------------------|
| For ChIP analysis |              |                           |                                     |
| <i>CmNRT</i>      |              |                           |                                     |
| #1                | NRT-ChIP-F2  | TTCACGGTGACAACGGAGT       | -516 to -386                        |
|                   | NRT-ChIP-R2  | CAAGCGTTTGGAGGGTTTT       |                                     |
| #2                | NRT-ChIP-F4  | GAATCTGTTGAGCCGTTCGT      | -254 to -112                        |
|                   | NRT-ChIP-R4  | CGTTGACCGTTGAACGAATA      |                                     |
| #3                | NRT-ChIP-F6  | GCGTTTCCCCGACATACATA      | +65 to +213                         |
|                   | NRT-ChIP-R6  | ATGAGTCGAGGGTGTCTGTCT     |                                     |
| #4                | NRT-ChIP-F7  | TTGCGCTTTCAGGTACAGTG      | +499 to +618                        |
|                   | NRT-ChIP-R7  | CGAACAGATACACCGGGATT      |                                     |
| <i>CmNIR</i>      |              |                           |                                     |
| #1                | SirB-ChIP-F2 | CGGCGAACGATAGAACGTAT      | -446 to -310                        |
|                   | SirB-ChIP-R2 | CACATGCCAGTGTCTCCAA       |                                     |
| #2                | SirB-ChIP-F4 | ACACGTGTCCGCTATGAGG       | -219 to -89                         |
|                   | SirB-ChIP-R4 | TCGCAGACCTGTCCAGTTAAG     |                                     |
| #3                | SirB-ChIP-F7 | ATCCGTTGACCGAGGTACTG      | +158 to +302                        |
|                   | SirB-ChIP-R7 | ATATGCTTCCGCGTTGTGAT      |                                     |
| #4                | SirB-ChIP-F8 | GGCAACGACCAGATCTTCAT      | +409 to +539                        |
|                   | SirB-ChIP-R8 | TTCAGACGGAGCATGAACTG      |                                     |
| <i>CmGS</i>       |              |                           |                                     |
| #1                | GS-CHIP-F1   | ATAGCTCGCTCACGAGTGCT      | -1028 to -820                       |
|                   | GS-CHIP-R1   | GCGAAATTGGATTCTTGCAAT     |                                     |
| #2                | GS-CHIP-F2   | GATGTCCGTTTCCGTTGAGT      | -146 to +20                         |
|                   | GS-CHIP-R2   | GGATTTGTCTGCTCCACGAT      |                                     |
| #3                | GS-CHIP-F3   | CAAAGGATCACAAGCCGATT      | +580 to +787                        |
|                   | GS-CHIP-R3   | CACAGTTGGTCGCCAGAGT       |                                     |
| <i>CmMYB1</i>     |              |                           |                                     |
| #1                | J282-ChIP-F1 | TTTATTCGGGAACGAGCCTA      | -798 to -652                        |
|                   | J282-ChIP-R1 | TACCCGGAAAACGTCAAAAAC     |                                     |
| #2                | J282-ChIP-F4 | ACTGCAAAAAGCAGCGGATCAGCG  | -210 to -101                        |
|                   | J282-ChIP-R4 | AAGGCTCTCTTGACATCGCACGAAA |                                     |
| #3                | J282-ChIP-F3 | TGGACGTTTCGAGGAGGAC       | +557 to +694                        |
|                   | J282-ChIP-R3 | CGGCGATGCATAGAACTGT       |                                     |

---

For QRT PCR  
with cDNA

|               |             |                      |              |
|---------------|-------------|----------------------|--------------|
| <i>CmMYB1</i> | MYB1_QRT_F1 | TTTGTCTTACGCCAGCTCCT | +258 to +384 |
|               | MYB1_QRT_R1 | GCGACACTCGGAGACTGACT |              |
| <i>CmNRT</i>  | NRT_QRT_F1  | ATTCGTACCGTTTGCCAGTC | +285 to +403 |
|               | NRT_QRT_R1  | AAACGCGATGAAAAAGGATG |              |
| <i>CmNIR</i>  | NIR_QRT_F1  | GGCAACGACCAGATCTTCAT | +408 to +538 |
|               | NIR_QRT_R1  | TTCAGACGGAGCATGAACTG |              |
| <i>CmGS</i>   | GS_QRT_F1   | CAAAGGATCACAAGCCGATT | +549 to +684 |
|               | GS_QRT_R1   | TACAGGCACGCCTTGTAGTG |              |

---
