# Supplementary material
Source: PubMed Central journal article supplement (PMC2718362)
Supplement: 0902790106_ST4_PDF.pdf [file 0902790106_ST4_PDF.pdf]

Table S4. Primers used for EMSA analysis

| Gene         | Primer           | Sequence (5'-3')                | Amplified region (+1 as the TSS) |
|--------------|------------------|---------------------------------|----------------------------------|
| <i>CmNRT</i> |                  |                                 |                                  |
| #1           | NRT-110bp-F6     | GTGACAACGGAGTGCTGGCG            | -510 to -401                     |
|              | NRT-110bp-R6     | TTTTTTAGAAATTGTGGAGTTTGCTAGTTGT |                                  |
| #2           | NRT-110bp-F7     | TTCTAAAAAACCTCCAAACGCTTGCAACT   | -410 to -301                     |
|              | NRT-110bp-R7     | TCCTAGTTCGCGTAAAAGGCAAACG       |                                  |
| #3           | NRT-110bp-F8     | CGAACTAGGAAACACGTTTCGCGAT       | -310 to -201                     |
|              | NRT-110bp-R8     | ATACGACGCCGCTACGCTCC            |                                  |
| #4           | NRT-110bp-F9     | GGCGTCGATTTTCGGGATCG            | -210 to -101                     |
|              | NRT-110bp-R9     | TGCAACCGAATCGTTGACCGTTGA        |                                  |
| #5           | NRT-110bp-F10    | TTCGGTTGCAGCGGCGCGCG            | -110 to +2                       |
|              | NRT-110bp-R10    | GCCAAACACGAATACAACGTGTGGC       |                                  |
| <i>CmNIR</i> |                  |                                 |                                  |
| #1           | SirB-GS-500bp-F2 | ACCGTGCTACGACCGCACCG            | -506 to -397                     |
|              | SirB-110bp-R1    | TTACCTCTTCTTGATATACTAGCCGC      |                                  |
| #2           | SirB-110bp-F2    | GAAGAGGTAAGGGTTATGGAACCTTGG     | -406 to -297                     |
|              | SirB-110bp-R2    | GGACAAGTCTTGACACATGCCAGTG       |                                  |
| #3           | SirB-110bp-F3    | AGACTTGTCCACTTAAAACAATTAACATGA  | -306 to -197                     |
|              | SirB-110bp-R3    | CCGGCCTCATAGCGGACAC             |                                  |
| #4           | SirB-110bp-F4    | ATGAGGCCGGATCGGCATCG            | -206 to -97                      |
|              | SirB-110bp-R4    | CTGTCCAGTTAAGTCTATAGTTGGCTCG    |                                  |
| #5           | SirB-110bp-F5    | AACTGGACAGGTCTGCGATGCTC         | -106 to +4                       |
|              | SirB-GS-500bp-R2 | AAACGAAGTAAGGCAAAAGCCATCCTGAAT  |                                  |
| <i>CmGS</i>  |                  |                                 |                                  |
| #1           | GS-110bp-F1      | GTAGGTCGATCTGCGTAGTTTGCAG       | -510 to -401                     |
|              | GS-110bp-R1      | CTCTGCTTTGCTATATCACTGAGGAC      |                                  |
| #2           | GS-110bp-F2      | CAAAGCAGAGCTGTTCCCGCG           | -410 to -301                     |
|              | GS-110bp-R2      | CGATAGAACGTATGAAGCAATCTGAATAC   |                                  |
| #3           | GS-110bp-F3      | ATCTGAATACCCGAGATTTTCGTACCTTTC  | -310 to -201                     |
|              | GS-110bp-R3      | GACGATGGACACCAGATTGCAG          |                                  |
| #4           | GS-110bp-F4      | GTCCATCGTCCACAGAAACGTC          | -210 to -101                     |
|              | GS-110bp-R4      | TGGACGGCAGCGCACGCT              |                                  |
| #5           | GS-110bp-F5      | CTGCCGTCCATTCGTCAGCG            | -110 to +2                       |
|              | GS-110bp-R5      | AAGCGCTGACACGTCAAGCTCG          |                                  |
